# Supplementary material for: Epigenetic Regulator Smchd1 Functions as a Tumor Suppressor
Source: Oxford University Press journal article supplement (doi:10.1158/0008-5472.can-12-3019), 2012-12-26
Supplement: 00085472can123019-sup-supplementary_tables_s3-s4_xlsx_file_-_576k.xlsx [file 00085472can123019-sup-supplementary_tables_s3-s4_xlsx_file_-_576k.xlsx]

## Sheet: Information
The C2 genesets are shown in the upper part of each sheet, for the cell type listed in the sheet label.
The highlighted genesets have been mentioned in the text, and have a reference given.
If more information is required, search for the geneset name in the Broad Institute's website.
http://www.broadinstitute.org/gsea/msigdb
The lower part of each sheet shows the list of differentially expressed genes for the cell type named in the sheet label. Either all those with an adjusted p < 0.05, or the top 100 genes are shown, whichever is larger.

## Sheet: Table S3 - Primary MEFs
Table S3
MSigDB C2 Curated Gene Sets	NGenes	Correlation	Down	Up	TwoSided	FDR	Direction
DIRMEIER_LMP1_RESPONSE_EARLY	66	-0.00281521	0.998423	0.00157704	0.00315407	0.967266	Up
HUPER_BREAST_BASAL_VS_LUMINAL_DN	58	-0.00853448	0.997778	0.00222193	0.00444385	0.967266	Up
LIANG_SILENCED_BY_METHYLATION_2	31	-0.00371881	0.997736	0.00226363	0.00452726	0.967266	Up
AMIT_EGF_RESPONSE_60_MCF10A	42	0.0126965	0.996796	0.00320424	0.00640848	0.967266	Up
AMIT_SERUM_RESPONSE_40_MCF10A	37	0.0175748	0.996748	0.00325247	0.00650493	0.967266	Up
CHASSOT_SKIN_WOUND	10	0.147502	0.996291	0.00370876	0.00741752	0.967266	Up
ZHANG_RESPONSE_TO_IKK_INHIBITOR_AND_TNF_UP	197	0.00423774	0.995425	0.00457478	0.00914956	0.967266	Up
AMIT_EGF_RESPONSE_40_MCF10A	24	-0.0219207	0.995174	0.00482577	0.00965154	0.967266	Up
RASHI_RESPONSE_TO_IONIZING_RADIATION_2	166	-0.00069848	0.995113	0.00488702	0.00977404	0.967266	Up
FARMER_BREAST_CANCER_APOCRINE VS LUMINAL	325	-0.00201554	0.995103	0.00489658	0.00979317	0.967266	Up
COLDREN_GEFITINIB_RESISTANCE_DN	181	0.0168678	0.993857	0.00614293	0.0122859	0.967266	Up
GENTILE_UV_HIGH_DOSE_DN	321	-0.00164751	0.993752	0.00624764	0.0124953	0.967266	Up
GEISS_RESPONSE_TO_DSRNA_UP	38	-0.0105257	0.99296	0.00703992	0.0140798	0.967266	Up
MUELLER_METHYLATED_IN_GLIOBLASTOMA	28	0.0135965	0.992654	0.00734608	0.0146922	0.967266	Up
YEMELYANOV_GR_TARGETS_DN	13	-0.0679534	0.992412	0.00758821	0.0151764	0.967266	Up
SEKI_INFLAMMATORY_RESPONSE_LPS_UP	87	0.0281981	0.992113	0.00788722	0.0157744	0.967266	Up
ZHU_CMV_8_HR_UP	29	0.00740118	0.9921	0.0079003	0.0158006	0.967266	Up
KEGG_ALLOGRAFT_REJECTION	15	-0.0183882	0.991608	0.00839152	0.016783	0.967266	Up
SESTO_RESPONSE_TO_UV_C0	113	0.0012827	0.991461	0.00853898	0.017078	0.967266	Up
WATTEL_AUTONOMOUS_THYROID_ADENOMA_DN	23	-0.0199738	0.991436	0.00856377	0.0171275	0.967266	Up
SENGUPTA_NASOPHARYNGEAL_CARCINOMA_WITH_LMP1_DN	93	0.00940968	0.990867	0.00913322	0.0182664	0.967266	Up
DAUER_STAT3_TARGETS_UP	40	0.0010066	0.990859	0.00914135	0.0182827	0.967266	Up
REACTOME_TIGHT_JUNCTION_INTERACTIONS	22	0.0130932	0.990629	0.00937087	0.0187417	0.967266	Up
BIERIE_INFLAMMATORY_RESPONSE_TGFB1	2	0.410419	0.99056	0.00944006	0.0188801	0.967266	Up
DAUER_STAT3_TARGETS_DN	26	0.0596854	0.990299	0.00970059	0.0194012	0.967266	Up
MAHAJAN_RESPONSE_TO_IL1A_UP	54	-0.00368138	0.990154	0.00984577	0.0196915	0.967266	Up
SANA_TNF_SIGNALING_UP	73	0.046463	0.990124	0.00987603	0.0197521	0.967266	Up
MISHRA_CARCINOMA_ASSOCIATED_FIBROBLAST_DN	27	-0.00924701	0.989829	0.0101714	0.0203427	0.967266	Up
GUTIERREZ_WALDENSTROEMS_MACROGLOBULINEMIA_1_DN	7	-0.0370604	0.989411	0.0105886	0.0211773	0.967266	Up
SASAKI_TARGETS_OF_TP73_AND_TP63	6	0.0730117	0.989234	0.0107662	0.0215324	0.967266	Up
YAO_TEMPORAL_RESPONSE_TO_PROGESTERONE_CLUSTER_8	53	-0.00480515	0.989125	0.0108753	0.0217507	0.967266	Up
APPIERTO_RESPONSE_TO_FENRETINIDE_UP	54	0.000271061	0.989106	0.0108938	0.0217875	0.967266	Up
GRAHAM_CML_QUIESCENT_VS_NORMAL_DIVIDING_UP	48	0.0131326	0.988809	0.0111913	0.0223827	0.967266	Up
TENEDINI_MEGAKARYOCYTE_MARKERS	62	-0.00169786	0.988739	0.0112609	0.0225218	0.967266	Up
GENTILE_UV_HIGH_DOSE_UP	13	0.0567244	0.988639	0.0113611	0.0227222	0.967266	Up
CHEN_LVAD_SUPPORT_OF_FAILING_HEART_UP	94	0.00430938	0.988283	0.0117168	0.0234336	0.967266	Up
DAZARD_UV_RESPONSE_CLUSTER_G2	20	0.0154209	0.988019	0.0119814	0.0239629	0.967266	Up
BROWNE_HCMV_INFECTION_6HR_DN	180	-0.00114133	0.987982	0.0120179	0.0240358	0.967266	Up
SIMBULAN_UV_RESPONSE_NORMAL_UP	9	-0.00815928	0.987513	0.0124871	0.0249743	0.967266	Up
MCBRYAN_PUBERTAL_BREAST_5_6WK_UP	108	-0.000325015	0.987471	0.0125286	0.0250572	0.967266	Up
RIGGINS_TAMOXIFEN_RESISTANCE_DN	225	0.00944243	0.98736	0.0126396	0.0252792	0.967266	Up
AIGNER_ZEB1_TARGETS	28	0.0124924	0.987271	0.012729	0.025458	0.967266	Up
KEGG_ASTHMA	9	-0.0303037	0.987185	0.0128148	0.0256297	0.967266	Up
TSAI_RESPONSE_TO_RADIATION_THERAPY	39	-0.0100968	0.98696	0.0130395	0.0260791	0.967266	Up
UEDA_CENTRAL_CLOCK	115	-0.00258656	0.986487	0.0135126	0.0270252	0.967266	Up
KEGG_AUTOIMMUNE_THYROID_DISEASE	14	-0.0218153	0.986436	0.0135639	0.0271278	0.967266	Up
AMIT_EGF_RESPONSE_20_HELA	9	-0.0271912	0.986182	0.0138181	0.0276362	0.967266	Up
KEGG_ANTIGEN_PROCESSING_AND_PRESENTATION	46	0.000102527	0.986145	0.0138555	0.027711	0.967266	Up
HELLER_SILENCED_BY_METHYLATION_UP	218	0.00556052	0.98609	0.0139096	0.0278193	0.967266	Up
TAKEDA_TARGETS_OF_NUP98_HOXA9_FUSION_8D_UP	125	0.00364477	0.985992	0.0140085	0.028017	0.967266	Up
KEGG_NOD_LIKE_RECEPTOR_SIGNALING_PATHWAY	64	-0.00759115	0.985955	0.0140445	0.0280891	0.967266	Up
KEGG_GRAFT_VERSUS_HOST_DISEASE	13	-0.0419976	0.985846	0.0141544	0.0283089	0.967266	Up
GERY_CEBP_TARGETS	142	-0.000674437	0.985537	0.0144634	0.0289268	0.967266	Up
BIOCARTA_GLEEVEC_PATHWAY	32	-0.000710167	0.985514	0.0144863	0.0289726	0.967266	Up
WONG_ENDMETRIUM_CANCER_UP	13	0.0378901	0.984974	0.0150257	0.0300515	0.967266	Up
AMIT_SERUM_RESPONSE_240_MCF10A	67	-0.0052005	0.984746	0.0152538	0.0305077	0.967266	Up
AMIT_SERUM_RESPONSE_60_MCF10A	64	0.00287963	0.984704	0.0152965	0.030593	0.967266	Up
NAGASHIMA_EGF_SIGNALING_UP	55	0.0928268	0.984685	0.0153151	0.0306303	0.967266	Up
UZONYI_RESPONSE_TO_LEUKOTRIENE_AND_THROMBIN	39	0.0655318	0.98463	0.0153702	0.0307404	0.967266	Up
MYLLYKANGAS_AMPLIFICATION_HOT_SPOT_7	8	-0.0703363	0.983652	0.0163476	0.0326951	0.967266	Up
ONDER_CDH1_TARGETS_3_DN	31	0.1067	0.98355	0.0164501	0.0329003	0.967266	Up
TSAI_RESPONSE_TO_IONIZING_RADIATION	128	-0.00300766	0.983213	0.0167865	0.033573	0.967266	Up
HAN_SATB1_TARGETS_DN	396	0.00172049	0.983196	0.0168036	0.0336072	0.967266	Up
KEGG_LEISHMANIA_INFECTION	67	-0.00205509	0.983127	0.0168731	0.0337462	0.967266	Up
GESERICK_TERT_TARGETS_DN	23	0.143128	0.98288	0.0171197	0.0342394	0.967266	Up
SANA_RESPONSE_TO_IFNG_UP	49	0.0556047	0.982878	0.0171221	0.0342441	0.967266	Up
TAKEDA_TARGETS_OF_NUP98_HOXA9_FUSION_3D_UP	147	0.0126977	0.982762	0.0172379	0.0344758	0.967266	Up
OSWALD_HEMATOPOIETIC_STEM_CELL_IN_COLLAGEN_GEL_UP	242	0.00241766	0.982318	0.017682	0.035364	0.967266	Up
OSWALD_HEMATOPOIETIC_STEM_CELL_IN_COLLAGEN_GEL_DN	242	0.00241766	0.982318	0.017682	0.035364	0.967266	Up
XU_HGF_TARGETS_REPRESSED_BY_AKT1_UP	6	-0.150588	0.982274	0.0177263	0.0354525	0.967266	Up
SMID_BREAST_CANCER_BASAL_UP	653	0.0018785	0.982246	0.017754	0.0355081	0.967266	Up
KIM_RESPONSE_TO_TSA_AND_DECITABINE_UP	110	0.00864275	0.981772	0.0182275	0.0364551	0.967266	Up	Kim et al, Cancer Res, 2006
BROWNE_HCMV_INFECTION_30MIN_UP	49	0.0055566	0.981554	0.0184456	0.0368912	0.967266	Up
SWEET_LUNG_CANCER_KRAS_UP	549	0.00155638	0.981322	0.0186784	0.0373568	0.967266	Up
WHITESIDE_CISPLATIN_RESISTANCE_DN	17	-0.0028166	0.981178	0.0188216	0.0376433	0.967266	Up
BIOCARTA_ASBCELL_PATHWAY	5	0.0121736	0.98097	0.0190298	0.0380597	0.967266	Up
NUYTTEN_NIPP1_TARGETS_UP	637	0.00291244	0.980593	0.0194072	0.0388143	0.967266	Up
WU_CELL_MIGRATION	199	0.00610209	0.980532	0.0194684	0.0389368	0.967266	Up
ONDER_CDH1_TARGETS_1_DN	178	0.0022485	0.980236	0.0197645	0.0395289	0.967266	Up
CAVARD_LIVER_CANCER_MALIGNANT_VS_BENIGN	26	0.00808743	0.980193	0.0198073	0.0396146	0.967266	Up
NUYTTEN_EZH2_TARGETS_UP	1038	0.00615909	0.979889	0.0201109	0.0402218	0.967266	Up
SESTO_RESPONSE_TO_UV_C3	28	-0.00731435	0.979553	0.0204467	0.0408935	0.967266	Up
BERENJENO_ROCK_SIGNALING_NOT_VIA_RHOA_UP	43	-0.0012434	0.979449	0.0205515	0.041103	0.967266	Up
BOYLAN_MULTIPLE_MYELOMA_C_D_DN	219	0.0120682	0.979208	0.0207919	0.0415838	0.967266	Up
BOYLAN_MULTIPLE_MYELOMA_C_CLUSTER_DN	31	0.0327397	0.979124	0.0208763	0.0417526	0.967266	Up
DACOSTA_LOW_DOSE_UV_RESPONSE_VIA_ERCC3_XPCS_UP	8	-0.0495865	0.978831	0.0211685	0.0423371	0.967266	Up
SOUCEK_MYC_TARGETS	8	0.488657	0.9786	0.0213997	0.0427993	0.967266	Up
WANG_BARRETTS_ESOPHAGUS_DN	25	0.0142046	0.978549	0.0214509	0.0429017	0.967266	Up
ZEMBUTSU_SENSITIVITY_TO_NIMUSTINE	3	-0.208424	0.978501	0.0214993	0.0429985	0.967266	Up
LI_AMPLIFIED_IN_LUNG_CANCER	180	-0.000551885	0.978456	0.0215444	0.0430888	0.967266	Up
LIANG_SILENCED_BY_METHYLATION_UP	28	0.00752754	0.978056	0.021944	0.043888	0.967266	Up
MURATA_VIRULENCE_OF_H_PILORI	18	-0.0533639	0.977947	0.0220526	0.0441052	0.967266	Up
SMID_BREAST_CANCER_LUMINAL_B_DN	472	0.00604411	0.977733	0.0222668	0.0445336	0.967266	Up
ABE_VEGFA_TARGETS_30MIN	21	0.0417056	0.977708	0.0222922	0.0445845	0.967266	Up
JIANG_TIP30_TARGETS_UP	44	-0.0167431	0.977634	0.0223655	0.0447311	0.967266	Up
AMIT_EGF_RESPONSE_60_HELA	57	0.00215905	0.977525	0.0224755	0.0449509	0.967266	Up
GRAHAM_CML_QUIESCENT_VS_CML_DIVIDING_UP	16	0.149715	0.977454	0.0225458	0.0450917	0.967266	Up
HU_ANGIOGENESIS_UP	27	-0.00429304	0.976971	0.0230288	0.0460575	0.967266	Up
GAURNIER_PSMD4_TARGETS	34	0.0263225	0.976712	0.0232875	0.0465751	0.967266	Up
TAVOR_CEBPA_TARGETS_UP	45	-0.0100666	0.976507	0.0234929	0.0469859	0.967266	Up
MISSIAGLIA_REGULATED_BY_METHYLATION_UP	107	0.0194283	0.97633	0.0236701	0.0473401	0.967266	Up
TURASHVILI_BREAST_LOBULAR_CARCINOMA_VS_DUCTAL_NORMAL_DN	91	-0.000823415	0.976319	0.0236813	0.0473625	0.967266	Up
RUGO_STRESS_RESPONSE_SUBSET_F	12	0.0164128	0.975956	0.0240437	0.0480874	0.967266	Up
KYNG_DNA_DAMAGE_BY_4NQO_OR_GAMMA_RADIATION	12	0.0164128	0.975956	0.0240437	0.0480874	0.967266	Up
HOSHIDA_LIVER_CANCER_LATE_RECURRENCE_UP	58	0.0144304	0.975933	0.0240669	0.0481339	0.967266	Up
SESTO_RESPONSE_TO_UV_C2	65	0.00628344	0.975916	0.0240841	0.0481683	0.967266	Up
MARTORIATI_MDM4_TARGETS_FETAL_LIVER_UP	128	0.00292717	0.975713	0.0242871	0.0485743	0.967266	Up
BROWNE_HCMV_INFECTION_2HR_UP	33	-0.0123337	0.975351	0.024649	0.049298	0.967266	Up
NAGASHIMA_NRG1_SIGNALING_UP	193	0.0447804	0.975097	0.0249034	0.0498067	0.967266	Up
CERVERA_SDHB_TARGETS_2	111	0.0100995	0.975069	0.0249307	0.0498613	0.967266	Up
BOYAULT_LIVER_CANCER_SUBCLASS_G6_DN	18	0.0423412	0.974556	0.0254439	0.0508878	0.967266	Up
BENNETT_SYSTEMIC_LUPUS_ERYTHEMATOSUS	18	0.267035	0.974513	0.0254873	0.0509747	0.967266	Up
ST_P38_MAPK_PATHWAY	46	-0.00479226	0.974467	0.0255335	0.051067	0.967266	Up
MORI_EMU_MYC_LYMPHOMA_BY_ONSET_TIME_DN	21	-0.00388434	0.973867	0.0261332	0.0522663	0.967266	Up
CHARAFE_BREAST_CANCER_LUMINAL_VS_BASAL_DN	501	0.00529333	0.973619	0.0263812	0.0527624	0.967266	Up
LANDIS_BREAST_CANCER_PROGRESSION_UP	48	0.00444288	0.973587	0.0264131	0.0528263	0.967266	Up
BIOCARTA_FEEDER_PATHWAY	11	0.0470047	0.973391	0.0266092	0.0532185	0.967266	Up
DORN_ADENOVIRUS_INFECTION_12HR_UP	24	0.0105846	0.973385	0.0266148	0.0532295	0.967266	Up
BROCKE_APOPTOSIS_REVERSED_BY_IL6	171	0.00222904	0.973055	0.0269447	0.0538893	0.967266	Up
TSUNODA_CISPLATIN_RESISTANCE_UP	11	0.0369667	0.972955	0.0270453	0.0540906	0.967266	Up
ONDER_CDH1_TARGETS_2_DN	401	0.043845	0.972693	0.0273073	0.0546146	0.967266	Up
BILBAN_B_CLL_LPL_DN	36	0.0230904	0.972618	0.0273817	0.0547634	0.967266	Up
JAEGER_METASTASIS_DN	254	0.110217	0.972501	0.0274993	0.0549986	0.967266	Up
VETTER_TARGETS_OF_PRKCA_AND_ETS1_DN	16	-0.0196473	0.972193	0.0278066	0.0556133	0.967266	Up
BOQUEST_STEM_CELL_CULTURED_VS_FRESH_UP	3	0.106574	0.97186	0.0281404	0.0562809	0.967266	Up
HAMAI_APOPTOSIS_VIA_TRAIL_UP	384	0.00879965	0.971691	0.0283089	0.0566177	0.967266	Up
BERTUCCI_MEDULLARY_VS_DUCTAL_BREAST_CANCER_UP	205	0.0049924	0.97151	0.0284904	0.0569808	0.967266	Up
MORI_SMALL_PRE_BII_LYMPHOCYTE_DN	78	-0.00678367	0.971384	0.0286161	0.0572322	0.967266	Up
WAMUNYOKOLI_OVARIAN_CANCER_LMP_DN	217	0.00134052	0.971332	0.0286678	0.0573356	0.967266	Up
SHAFFER_IRF4_TARGETS_IN_PLASMA_CELL_VS_MATURE_B_LYMPHOCYTE	66	0.0202461	0.971239	0.0287606	0.0575213	0.967266	Up
ST_DIFFERENTIATION_PATHWAY_IN_PC12_CELLS	61	0.00684832	0.971103	0.0288969	0.0577937	0.967266	Up
PICCALUGA_ANGIOIMMUNOBLASTIC_LYMPHOMA_DN	148	0.0559555	0.97109	0.0289102	0.0578203	0.967266	Up
GAUSSMANN_MLL_AF4_FUSION_TARGETS_E_DN	33	0.118824	0.971048	0.0289516	0.0579031	0.967266	Up
BIOCARTA_NTHI_PATHWAY	28	0.00871221	0.970931	0.0290689	0.0581379	0.967266	Up
VALK_AML_CLUSTER_1	31	0.0980855	0.970738	0.0292618	0.0585237	0.967266	Up
CONCANNON_APOPTOSIS_BY_EPOXOMICIN_UP	298	0.00690701	0.970406	0.0295936	0.0591872	0.967266	Up
CHANG_IMMORTALIZED_BY_HPV31_DN	35	0.0459308	0.97035	0.0296498	0.0592996	0.967266	Up
TESAR_ALK_TARGETS_HUMAN_ES_5D_DN	3	-0.187726	0.970234	0.0297663	0.0595326	0.967266	Up
LU_TUMOR_VASCULATURE_UP	33	-0.0200351	0.970171	0.0298293	0.0596585	0.967266	Up
CHARAFE_BREAST_CANCER_BASAL_VS_MESENCHYMAL_UP	105	0.106459	0.970086	0.0299142	0.0598283	0.967266	Up
TIAN_TNF_SIGNALING_NOT_VIA_NFKB	15	0.0887309	0.970064	0.0299364	0.0598728	0.967266	Up
DEBIASI_APOPTOSIS_BY_REOVIRUS_INFECTION_UP	287	0.0142839	0.969991	0.0300088	0.0600175	0.967266	Up
GENTILE_UV_RESPONSE_CLUSTER_D4	63	-0.00800145	0.969461	0.0305387	0.0610774	0.967266	Up
SENESE_HDAC1_TARGETS_UP	498	0.00849613	0.969282	0.0307182	0.0614364	0.967266	Up	Senese et al, Mol Cell Biol, 2007
NAKAMURA_TUMOR_ZONE_PERIPHERAL_VS_CENTRAL_DN	644	0.0071948	0.969165	0.0308345	0.061669	0.967266	Up
WALLACE_PROSTATE_CANCER_UP	21	-0.0350386	0.969087	0.0309125	0.061825	0.967266	Up
LEE_LIVER_CANCER_MYC_E2F1_UP	56	0.000636274	0.969054	0.0309461	0.0618922	0.967266	Up
KEGG_TYPE_I_DIABETES_MELLITUS	21	-0.0298953	0.968898	0.0311018	0.0622035	0.967266	Up
RICKMAN_TUMOR_DIFFERENTIATED_WELL_VS_POORLY_DN	406	0.00593386	0.968884	0.0311159	0.0622317	0.967266	Up
YAMASHITA_METHYLATED_IN_PROSTATE_CANCER	52	-0.00331393	0.968751	0.0312493	0.0624987	0.967266	Up
BUDHU_LIVER_CANCER_METASTASIS_DN	1	NA	0.968702	0.0312984	0.0625968	0.967266	Up
SEIKE_LUNG_CANCER_POOR_SURVIVAL	1	NA	0.968702	0.0312984	0.0625968	0.967266	Up
RODRIGUES_NTN1_AND_DCC_TARGETS	26	0.0407391	0.968572	0.0314282	0.0628564	0.967266	Up
TURJANSKI_MAPK7_TARGETS	8	0.32945	0.968531	0.0314688	0.0629376	0.967266	Up
YAO_TEMPORAL_RESPONSE_TO_PROGESTERONE_CLUSTER_9	80	0.00716781	0.96826	0.0317397	0.0634794	0.967266	Up
KRIGE_RESPONSE_TO_TOSEDOSTAT_6HR_UP	1014	0.00152935	0.968223	0.0317775	0.063555	0.967266	Up
MISHRA_CARCINOMA_ASSOCIATED_FIBROBLAST_UP	24	-0.0210855	0.967828	0.0321724	0.0643448	0.967266	Up
SMID_BREAST_CANCER_NORMAL_LIKE_DN	4	-0.107093	0.967719	0.0322806	0.0645613	0.967266	Up
REACTOME_APOPTOTIC_CLEAVAGE_OF_CELL_ADHESION_PROTEINS	9	0.0596796	0.967629	0.0323705	0.0647411	0.967266	Up
BIOCARTA_EGF_PATHWAY	46	0.0201886	0.967567	0.0324328	0.0648657	0.967266	Up
BROWNE_HCMV_INFECTION_4HR_UP	50	0.00618592	0.967417	0.0325829	0.0651658	0.967266	Up
GENTILE_UV_RESPONSE_CLUSTER_D2	36	0.0165506	0.967397	0.0326033	0.0652066	0.967266	Up
HAHTOLA_MYCOSIS_FUNGOIDES_CD4_UP	63	-0.0115556	0.967244	0.0327559	0.0655117	0.967266	Up
BIOCARTA_PPARA_PATHWAY	59	0.0246775	0.966986	0.0330136	0.0660273	0.967266	Up
GRUETZMANN_PANCREATIC_CANCER_DN	224	0.000252369	0.966767	0.0332327	0.0664654	0.967266	Up
HALMOS_CEBPA_TARGETS_UP	33	0.0217167	0.966655	0.0333451	0.0666903	0.967266	Up
ELVIDGE_HIF1A_TARGETS_DN	113	0.0385408	0.96649	0.0335102	0.0670204	0.967266	Up
BIOCARTA_RANKL_PATHWAY	18	0.0952403	0.966465	0.0335345	0.0670691	0.967266	Up
ZHOU_INFLAMMATORY_RESPONSE_LPS_UP	298	0.0113939	0.966056	0.0339442	0.0678885	0.967266	Up
DORSAM_HOXA9_TARGETS_DN	37	-0.00522204	0.965909	0.0340907	0.0681814	0.967266	Up
CHIARADONNA_NEOPLASTIC_TRANSFORMATION_KRAS_CDC25_DN	67	-0.00417058	0.965907	0.0340934	0.0681868	0.967266	Up
HUPER_BREAST_BASAL_VS_LUMINAL_UP	49	0.0923943	0.96583	0.0341696	0.0683393	0.967266	Up
ELVIDGE_HYPOXIA_UP	233	0.0214222	0.965473	0.0345268	0.0690535	0.967266	Up
DAZARD_RESPONSE_TO_UV_NHEK_UP	161	0.00737978	0.965171	0.0348292	0.0696584	0.967266	Up
ELVIDGE_HIF1A_AND_HIF2A_TARGETS_DN	138	0.0356518	0.965015	0.0349852	0.0699704	0.967266	Up
CROMER_METASTASIS_DN	91	0.0019702	0.964877	0.0351231	0.0702463	0.967266	Up
SENGUPTA_NASOPHARYNGEAL_CARCINOMA_WITH_LMP1_UP	400	0.0122765	0.964707	0.0352932	0.0705863	0.967266	Up
WU_HBX_TARGETS_1_UP	25	0.00373508	0.964589	0.0354112	0.0708223	0.967266	Up
PASQUALUCCI_LYMPHOMA_BY_GC_STAGE_UP	311	0.00459003	0.964312	0.0356882	0.0713765	0.967266	Up
AMIT_EGF_RESPONSE_40_HELA	50	0.0599984	0.96429	0.0357097	0.0714195	0.967266	Up
MCMURRAY_TP53_HRAS_COOPERATION_RESPONSE_UP	26	-0.0077232	0.96429	0.0357104	0.0714209	0.967266	Up
WAMUNYOKOLI_OVARIAN_CANCER_GRADES_1_2_UP	138	0.00699369	0.964204	0.035796	0.0715919	0.967266	Up
SPIRA_SMOKERS_LUNG_CANCER_UP	42	0.0138938	0.963997	0.0360029	0.0720058	0.967266	Up
CHEN_HOXA5_TARGETS_6HR_UP	5	0.105282	0.963993	0.0360074	0.0720148	0.967266	Up
ELVIDGE_HYPOXIA_BY_DMOG_UP	178	0.0362672	0.96386	0.0361401	0.0722801	0.967266	Up
KYNG_DNA_DAMAGE_DN	118	0.00795419	0.963626	0.0363741	0.0727482	0.967266	Up
MASRI_RESISTANCE_TO_TAMOXIFEN_AND_AROMATASE_INHIBITORS_DN	17	-0.0198201	0.963554	0.0364461	0.0728922	0.967266	Up
TESAR_ALK_TARGETS_HUMAN_ES_4D_DN	2	0.326277	0.963542	0.0364583	0.0729166	0.967266	Up
XU_HGF_SIGNALING_NOT_VIA_AKT1_6HR	31	-0.0214029	0.963386	0.0366142	0.0732284	0.967266	Up
BOYAULT_LIVER_CANCER_SUBCLASS_G23_DN	16	0.0443001	0.962673	0.0373272	0.0746545	0.967266	Up
DAZARD_UV_RESPONSE_CLUSTER_G1	33	-0.0141319	0.96245	0.0375504	0.0751007	0.967266	Up
GU_PDEF_TARGETS_DN	29	0.0425623	0.962177	0.0378233	0.0756467	0.967266	Up
LEE_NEURAL_CREST_STEM_CELL_DN	96	0.00168294	0.962099	0.0379007	0.0758015	0.967266	Up
REACTOME_ACTIVATION_OF_THE_AP1_FAMILY_OF_TRANSCRIPTION_FACTORS	18	0.0139098	0.96203	0.0379702	0.0759404	0.967266	Up
KANG_GIST_WITH_PDGFRA_UP	8	-0.00548265	0.961756	0.0382438	0.0764875	0.967266	Up
RICKMAN_HEAD_AND_NECK_CANCER_E	38	0.0129083	0.961716	0.0382842	0.0765683	0.967266	Up
FARMER_BREAST_CANCER_CLUSTER_7	21	0.00626385	0.961676	0.0383235	0.076647	0.967266	Up
IGARASHI_ATF4_TARGETS_DN	107	-0.00266599	0.961181	0.0388191	0.0776381	0.967266	Up
SEMBA_FHIT_TARGETS_UP	11	-0.0248727	0.961145	0.0388547	0.0777095	0.967266	Up
LEE_SP4_THYMOCYTE	12	-0.0192563	0.960984	0.0390163	0.0780326	0.967266	Up
YAO_TEMPORAL_RESPONSE_TO_PROGESTERONE_CLUSTER_1	88	0.0241099	0.960684	0.039316	0.078632	0.967266	Up
ENGELMANN_CANCER_PROGENITORS_DN	67	0.000937045	0.96047	0.03953	0.0790601	0.967266	Up
TRAYNOR_RETT_SYNDROM_UP	25	0.0189772	0.960286	0.0397144	0.0794287	0.967266	Up
HORIUCHI_WTAP_TARGETS_UP	263	0.00824067	0.959502	0.0404975	0.080995	0.967266	Up
AKL_HTLV1_INFECTION_DN	90	0.00742053	0.959431	0.0405688	0.0811375	0.967266	Up
PAL_PRMT5_TARGETS_DN	22	-0.000769555	0.959334	0.0406659	0.0813319	0.967266	Up
MCBRYAN_PUBERTAL_BREAST_4_5WK_UP	276	0.00683111	0.959144	0.0408555	0.0817111	0.967266	Up
MOSERLE_IFNA_RESPONSE	23	0.360749	0.958596	0.0414037	0.0828073	0.967266	Up
TURJANSKI_MAPK11_TARGETS	8	0.2531	0.958544	0.0414559	0.0829118	0.967266	Up
JIANG_HYPOXIA_NORMAL	294	-0.000884668	0.957972	0.042028	0.0840559	0.967266	Up
BIOCARTA_PDGF_PATHWAY	45	0.0154136	0.957886	0.0421138	0.0842276	0.967266	Up
BIOCARTA_CTL_PATHWAY	7	0.0153426	0.957472	0.0425277	0.0850553	0.967266	Up
CHUANG_OXIDATIVE_STRESS_RESPONSE_UP	30	0.0124981	0.956917	0.0430826	0.0861653	0.967266	Up
DORN_ADENOVIRUS_INFECTION_24HR_DN	44	0.000239501	0.956725	0.0432748	0.0865496	0.967266	Up
OUYANG_PROSTATE_CANCER_PROGRESSION_UP	23	0.0239339	0.95631	0.0436905	0.087381	0.967266	Up
KANG_FLUOROURACIL_RESISTANCE_DN	18	0.0802111	0.956233	0.0437674	0.0875348	0.967266	Up
KAPOSI_LIVER_CANCER_POOR_SURVIVAL_DN	7	0.0443775	0.956224	0.0437763	0.0875527	0.967266	Up
TRACEY_RESISTANCE_TO_IFNA2_DN	13	0.00497234	0.955823	0.0441769	0.0883538	0.967266	Up
LIEN_BREAST_CARCINOMA_METAPLASTIC_VS_DUCTAL_UP	79	0.0022264	0.955677	0.0443231	0.0886461	0.967266	Up
SESTO_RESPONSE_TO_UV_C1	72	0.00999702	0.955534	0.0444664	0.0889329	0.967266	Up
BILD_HRAS_ONCOGENIC_SIGNATURE	275	0.0141934	0.955431	0.0445688	0.0891377	0.967266	Up
ZUCCHI_METASTASIS_DN	23	0.0103075	0.95532	0.0446797	0.0893595	0.967266	Up
DORN_ADENOVIRUS_INFECTION_32HR_DN	37	0.00757401	0.955149	0.0448511	0.0897022	0.967266	Up
SCHUHMACHER_MYC_TARGETS_UP	91	0.00303133	0.954935	0.0450647	0.0901294	0.967266	Up
CUI_GLUCOSE_DEPRIVATION	46	-0.0070822	0.954896	0.0451042	0.0902085	0.967266	Up
KONDO_EZH2_TARGETS	128	0.00998439	0.954478	0.0455225	0.091045	0.967266	Up
YAMASHITA_LIVER_CANCER_WITH_EPCAM_UP	64	-0.000378797	0.95417	0.0458297	0.0916594	0.967266	Up
TURASHVILI_BREAST_LOBULAR_CARCINOMA_VS_LOBULAR_NORMAL_UP	99	0.00963484	0.953474	0.0465257	0.0930514	0.967266	Up
LEE_LIVER_CANCER_DENA_UP	60	-0.0021575	0.953415	0.0465848	0.0931695	0.967266	Up
WINTER_HYPOXIA_UP	107	0.00153647	0.952865	0.047135	0.0942699	0.967266	Up
BHATI_G2M_ARREST_BY_2METHOXYESTRADIOL_UP	119	-0.00480964	0.952645	0.0473547	0.0947095	0.967266	Up
RODRIGUES_THYROID_CARCINOMA_ANAPLASTIC_UP	816	0.00458968	0.952477	0.0475227	0.0950454	0.967266	Up
MAHADEVAN_RESPONSE_TO_MP470_UP	14	0.318438	0.952438	0.0475622	0.0951244	0.967266	Up
RIZ_ERYTHROID_DIFFERENTIATION_12HR	44	0.024716	0.95218	0.04782	0.09564	0.967266	Up
ST_GRANULE_CELL_SURVIVAL_PATHWAY	37	-0.0134383	0.951932	0.0480675	0.096135	0.967266	Up
KYNG_ENVIRONMENTAL_STRESS_RESPONSE_NOT_BY_4NQO_IN_WS	15	0.0190145	0.951672	0.0483285	0.096657	0.967266	Up
BROWNE_HCMV_INFECTION_2HR_DN	53	0.0122604	0.951223	0.0487768	0.0975536	0.967266	Up
KOBAYASHI_EGFR_SIGNALING_6HR_DN	21	0.0991037	0.950891	0.0491086	0.0982172	0.967266	Up
AMIT_SERUM_RESPONSE_120_MCF10A	74	-0.00957644	0.950818	0.0491821	0.0983642	0.967266	Up
DAZARD_RESPONSE_TO_UV_SCC_DN	132	-0.00605004	0.950222	0.0497779	0.0995558	0.967266	Up
FARMER_BREAST_CANCER_CLUSTER_1	16	0.137001	0.95007	0.0499298	0.0998596	0.967266	Up
BOWIE_RESPONSE_TO_TAMOXIFEN	17	0.352271	0.950033	0.0499675	0.099935	0.967266	Up
CASTELLANO_NRAS_TARGETS_DN	28	-0.0133275	0.00723413	0.992766	0.0144683	0.967266	Down
ST_WNT_BETA_CATENIN_PATHWAY	32	-0.013149	0.00891721	0.991083	0.0178344	0.967266	Down
REACTOME_CHOLESTEROL_BIOSYNTHESIS	25	0.015387	0.00943681	0.990563	0.0188736	0.967266	Down
REACTOME_STEROID_METABOLISM	49	-0.00253816	0.0102864	0.989714	0.0205728	0.967266	Down
WEST_ADRENOCORTICAL_TUMOR_UP	387	0.00235726	0.0110099	0.98899	0.0220199	0.967266	Down
BIOCARTA_RB_PATHWAY	21	0.0101445	0.0141248	0.985875	0.0282496	0.967266	Down
BANDRES_RESPONSE_TO_CARMUSTIN_MGMT_48HR_DN	124	-0.00410091	0.0145703	0.98543	0.0291407	0.967266	Down
DING_LUNG_CANCER_MUTATED_FREQUENTLY	13	0.0268972	0.0170194	0.982981	0.0340389	0.967266	Down
MAINA_VHL_TARGETS_UP	9	-0.0408244	0.018727	0.981273	0.0374539	0.967266	Down
REACTOME_TRANSFORMATION_OF_LANOSTEROL_TO_CHOLESTEROL	17	-0.000696591	0.0197068	0.980293	0.0394136	0.967266	Down
THEILGAARD_NEUTROPHIL_AT_SKIN_WOUND_DN	287	0.00389613	0.0210972	0.978903	0.0421945	0.967266	Down
KEGG_STEROID_BIOSYNTHESIS	20	-0.00364063	0.021292	0.978708	0.042584	0.967266	Down
REACTOME_SIGNALING_BY_NOTCH	14	-0.0650375	0.0223098	0.97769	0.0446196	0.967266	Down
BANDRES_RESPONSE_TO_CARMUSTIN_WITHOUT_MGMT_48HR_DN	25	-0.00504133	0.0223924	0.977608	0.0447849	0.967266	Down
CHESLER_BRAIN_QTL_CIS	84	-0.00341236	0.0225516	0.977448	0.0451032	0.967266	Down
REACTOME_INTEGRATION_OF_ENERGY_METABOLISM	247	0.0037348	0.0228541	0.977146	0.0457082	0.967266	Down
NGUYEN_NOTCH1_TARGETS_UP	25	-0.0280836	0.0242753	0.975725	0.0485505	0.967266	Down
LOPEZ_MESOTHELIOMA_SURVIVAL_WORST_VS_BEST_UP	21	-0.0141277	0.0245797	0.97542	0.0491594	0.967266	Down
NIKOLSKY_BREAST_CANCER_16Q24_AMPLICON	48	-0.00597854	0.0248688	0.975131	0.0497376	0.967266	Down
PENG_GLUTAMINE_DEPRIVATION_UP	14	0.00937267	0.0271752	0.972825	0.0543503	0.967266	Down
JAZAERI_BREAST_CANCER_BRCA1_VS_BRCA2_UP	60	0.00229101	0.028363	0.971637	0.056726	0.967266	Down
REACTOME_POST_CHAPERONIN_TUBULIN_FOLDING_PATHWAY	17	0.0280208	0.0297574	0.970243	0.0595148	0.967266	Down
REACTOME_E2F_MEDIATED_REGULATION_OF_DNA_REPLICATION	35	0.0291217	0.0331729	0.966827	0.0663458	0.967266	Down
REACTOME_PYRUVATE_METABOLISM_AND_TCA_CYCLE	41	0.0125224	0.0335901	0.96641	0.0671801	0.967266	Down
YAO_TEMPORAL_RESPONSE_TO_PROGESTERONE_CLUSTER_16	107	0.0128824	0.0341118	0.965888	0.0682235	0.967266	Down
BYSTRYKH_HEMATOPOIESIS_STEM_CELL_QTL_TRANS	973	0.000985865	0.0342229	0.965777	0.0684459	0.967266	Down
WAKASUGI_HAVE_ZNF143_BINDING_SITES	65	0.00716235	0.0355222	0.964478	0.0710444	0.967266	Down
REACTOME_REGULATION_OF_PYRUVATE_DEHYDROGENASE_COMPLEX	15	-0.0436692	0.0355586	0.964441	0.0711172	0.967266	Down
LI_WILMS_TUMOR_VS_FETAL_KIDNEY_1_DN	215	0.00934464	0.0377912	0.962209	0.0755824	0.967266	Down
NIKOLSKY_BREAST_CANCER_11Q12_Q14_AMPLICON	136	0.00435176	0.0378868	0.962113	0.0757735	0.967266	Down
JAEGER_METASTASIS_UP	52	0.010754	0.0384549	0.961545	0.0769099	0.967266	Down
KEGG_CARDIAC_MUSCLE_CONTRACTION	61	0.00587463	0.0394714	0.960529	0.0789428	0.967266	Down
REACTOME_TRANSCRIPTION_OF_THE_HIV_GENOME	76	-0.00637896	0.0402937	0.959706	0.0805874	0.967266	Down
MYLLYKANGAS_AMPLIFICATION_HOT_SPOT_11	6	0.168705	0.0408733	0.959127	0.0817467	0.967266	Down
GALLUZZI_PERMEABILIZE_MITOCHONDRIA	53	-0.00309687	0.0413456	0.958654	0.0826911	0.967266	Down
CHEN_LVAD_SUPPORT_OF_FAILING_HEART_DN	33	-0.021902	0.0426152	0.957385	0.0852305	0.967266	Down
KEGG_OOCYTE_MEIOSIS	137	0.00933115	0.0437301	0.95627	0.0874602	0.967266	Down
NIKOLSKY_BREAST_CANCER_20Q11_AMPLICON	48	-0.00263342	0.044185	0.955815	0.08837	0.967266	Down
BIOCARTA_CELL2CELL_PATHWAY	19	-0.0122735	0.0443637	0.955636	0.0887274	0.967266	Down
GOLUB_ALL_VS_AML_DN	16	-0.0334323	0.0453806	0.954619	0.0907611	0.967266	Down
LINDGREN_BLADDER_CANCER_WITH_LOH_IN_CHR9Q	137	-0.00375818	0.0467171	0.953283	0.0934341	0.967266	Down
REACTOME_PYRUVATE_METABOLISM	16	-0.0246828	0.0467396	0.95326	0.0934793	0.967266	Down
YAO_TEMPORAL_RESPONSE_TO_PROGESTERONE_CLUSTER_14	195	-0.000960747	0.0479799	0.95202	0.0959599	0.967266	Down
WU_ALZHEIMER_DISEASE_DN	23	-0.015411	0.0480034	0.951997	0.0960067	0.967266	Down
GRADE_COLON_CANCER_UP	877	1.73606e-06	0.0480161	0.951984	0.0960322	0.967266	Down
REACTOME_RNA_POLYMERASE_II_TRANSCRIPTION	107	-0.00401897	0.0496319	0.950368	0.0992638	0.967266	Down
IIZUKA_LIVER_CANCER_PROGRESSION_L0_L1_UP	14	-0.0402928	0.049925	0.950075	0.0998501	0.967266	Down
Differentially expressed genes
ProbeID	TargetID	Symbol	logFC	AveExpr	t	P.Value	adj.P.Val	B
4150612	SMCHD1	Smchd1	-2.49	8.02	-23.0396	1.89e-08	0.00035	3.89386
1070341	4933439C20RIK	Pisd-ps3	2.379	10.7862	20.0712	5.46e-08	0.00051	3.73627
6520392	CSPRS	Csprs	1.962	5.75629	9.49315	1.49e-05	0.04071	2.03254
6220725	C130026I21RIK	C130026I21Rik	1.555	5.47462	10.1318	9.3e-06	0.04071	2.24822
1980129	LOC236604	NA	1.441	7.84237	9.91393	1.09e-05	0.04071	2.17769
1030632	PCDHB22	Pcdhb22	1.272	8.59824	9.38063	1.63e-05	0.04071	1.99162
1990504	MKRN3	Mkrn3	1.204	8.02076	9.79531	1.19e-05	0.04071	2.13799
510368	FOS	Fos	1.035	12.2121	9.28857	1.75e-05	0.04071	1.95744
2340445	C130026I21RIK	C130026I21Rik	1.701	6.42873	8.2984	3.91e-05	0.08099	1.54619
7000398	LOC673578	NA	1.557	5.98079	7.83526	5.86e-05	0.10923	1.3229
2100538	MUP2	Mup2	0.893	10.1748	7.62264	7.1e-05	0.12033	1.21289
2340056	CLDN10	Cldn10	0.82	7.90598	6.61708	0.000187138	0.26989	0.619866
110360	SCL0001651.1_229	NA	-0.747	6.06352	-6.49269	0.000212572	0.26989	0.537291
4810450	ADIPOQ	Adipoq	-0.866	6.2139	-6.49237	0.000212643	0.26989	0.537074
2030088	DEFB19	Defb19	-1.057	5.21	-6.47216	0.000217126	0.26989	0.523454
6420520	FOSB	Fosb	1.465	8.6629	6.31889	0.000254758	0.2749	0.418192
2190446	PCDHB3	Pcdhb3	1.119	7.09328	6.21226	0.000285186	0.2749	0.342915
5890019	PCDHA7	Pcdha7	0.889	8.57707	6.16961	0.000298467	0.2749	0.31232
4200100	DUSP1	Dusp1	0.753	11.7143	6.05936	0.000336074	0.2749	0.231951
1940338	H2-M3	H2-M3	0.738	8.45623	6.34359	0.000248233	0.2749	0.435389
4220246	GPR123	Gpr123	0.697	5.45089	6.03829	0.000343843	0.2749	0.216372
3610082	CXCL1	Cxcl1	0.682	11.2247	6.0211	0.000350328	0.2749	0.203612
5390692	LTC4S	Ltc4s	-0.712	5.48222	-6.08777	0.000325905	0.2749	0.252842
4730674	FOLR1	Folr1	-0.916	5.63311	-6.0119	0.000353854	0.2749	0.196765
1010088	PCDHB19	Pcdhb19	1.115	5.69186	5.89991	0.000400062	0.29837	0.112345
240739	INHA	Inha	-0.778	6.46034	-5.76802	0.000463225	0.33219	0.0103236
160735	SMCHD1	Smchd1	-1.019	5.56	-5.67112	0.00051664	0.35677	-0.0664582
5270056	SFTPD	Sftpd	1.075	5.54408	5.58532	0.000569633	0.36623	-0.135749
3120639	PCDHA7	Pcdha7	0.661	9.32686	5.58537	0.000569599	0.36623	-0.135706
1500403	B230209E15RIK	B230209E15Rik	0.938	6.36057	5.45234	0.000663997	0.38923	-0.245631
6280575	PORCN	Porcn	-0.703	5.35631	-5.44937	0.000666288	0.38923	-0.248115
5720609	LYZ	Lyz1	-0.917	13.6129	-5.44713	0.000668029	0.38923	-0.249998
7100458	2210023G05RIK	Ces2g	1.342	7.43491	5.259	0.000833297	0.39203	-0.410873
3940242	SAMD9L	Samd9l	1.051	10.1755	5.40725	0.000699798	0.39203	-0.283583
5720767	4933421E11RIK	4933421E11Rik	0.854	5.89011	5.35514	0.000743831	0.39203	-0.327879
1510750	MMP3	Mmp3	0.813	6.70548	5.30618	0.000787998	0.39203	-0.36994
130598	OAS1G	Oas1g	0.794	8.06656	5.38371	0.000719323	0.39203	-0.303533
5960465	LOC382691	NA	0.629	8.93965	5.31498	0.000779854	0.39203	-0.36235
6100468	ARHGAP28	Arhgap28	-0.592	7.10764	-5.2551	0.000837167	0.39203	-0.414273
630471	NR1I3	Nr1i3	-0.649	5.45394	-5.25123	0.000841032	0.39203	-0.417655
580746	RASGRF1	Rasgrf1	0.568	7.89077	5.20004	0.000893975	0.40654	-0.462589
6840349	PCDHGB2	Pcdhgb2	0.894	5.64756	5.06416	0.00105311	0.41836	-0.584161
5820184	CDH1	Cdh1	0.831	7.28518	5.04118	0.00108297	0.41836	-0.605051
770451	RASGRF1	Rasgrf1	0.738	5.88977	5.02878	0.00109947	0.41836	-0.616364
5310682	DDEF2	Asap2	0.641	7.43429	5.10901	0.000997392	0.41836	-0.543662
5490546	LOC236371	NA	0.568	8.43308	5.06249	0.00105525	0.41836	-0.585677
1260348	9630013D22RIK	NA	0.507	5.38886	5.06477	0.00105233	0.41836	-0.583608
3440370	LOC382964	NA	-0.676	5.45856	-5.04539	0.00107744	0.41836	-0.601221
5560438	SEZ6L2	Sez6l2	-1.008	6.23	-5.06946	0.00104635	0.41836	-0.579352
4010048	ATP7A	Atp7a	0.835	7.13919	5.00588	0.00113067	0.42163	-0.637333

## Sheet: Table S3 - Transformed MEFs
Table S3
MsigDB C2 Curated Gene Sets	NGenes	Correlation	Down	Up	TwoSided	FDR	Direction
PUJANA_BRCA1_PCC_NETWORK	1824	-0.000187749	0.99999	1.04944e-05	2.09888e-05	0.0415732	Up	Pujana et al, Nat Genet, 2007
CAIRO_HEPATOBLASTOMA_CLASSES_UP	752	-0.00051198	0.999985	1.51604e-05	3.03208e-05	0.0415732	Up
PUJANA_CHEK2_PCC_NETWORK	890	0.000361161	0.999981	1.91346e-05	3.82693e-05	0.0415732	Up
PUJANA_BRCA2_PCC_NETWORK	488	-0.00089273	0.999961	3.85985e-05	7.71971e-05	0.0418776	Up	Pujana et al, Nat Genet, 2007
KOBAYASHI_EGFR_SIGNALING_24HR_DN	305	0.00117099	0.999961	3.93135e-05	7.86269e-05	0.0418776	Up
FOURNIER_ACINAR_DEVELOPMENT_LATE_2	357	1.97312e-05	0.999959	4.10999e-05	8.21997e-05	0.0418776	Up
SOTIRIOU_BREAST_CANCER_GRADE_1_VS_3_UP	162	0.00238437	0.999948	5.17046e-05	0.000103409	0.0418776	Up
GRAHAM_CML_DIVIDING_VS_NORMAL_QUIESCENT_UP	187	-0.00121887	0.999932	6.80565e-05	0.000136113	0.0418776	Up
TARTE_PLASMA_CELL_VS_PLASMABLAST_DN	399	-5.05533e-05	0.999926	7.3546e-05	0.000147092	0.0418776	Up
PUJANA_XPRSS_INT_NETWORK	235	0.000379338	0.999922	7.84805e-05	0.000156961	0.0418776	Up
WONG_EMBRYONIC_STEM_CELL_CORE	437	0.00130175	0.999905	9.50951e-05	0.00019019	0.0418776	Up
ZHANG_BREAST_CANCER_PROGENITORS_UP	443	-0.000162637	0.999877	0.000123175	0.00024635	0.0418776	Up
MANALO_HYPOXIA_DN	361	0.00288937	0.999875	0.00012484	0.000249679	0.0418776	Up
MUELLER_PLURINET	378	0.00218429	0.999865	0.000134682	0.000269365	0.0418776	Up
TIEN_INTESTINE_PROBIOTICS_24HR_UP	658	-0.000785471	0.999864	0.000135551	0.000271102	0.0418776	Up
WHITEFORD_PEDIATRIC_CANCER_MARKERS	121	0.00101587	0.999863	0.000136689	0.000273378	0.0418776	Up
KRIGE_RESPONSE_TO_TOSEDOSTAT_24HR_DN	1023	-0.00089312	0.999862	0.000138074	0.000276148	0.0418776	Up
LE_EGR2_TARGETS_UP	134	-0.000955646	0.999859	0.00014072	0.00028144	0.0418776	Up
HORIUCHI_WTAP_TARGETS_DN	358	0.00063537	0.999858	0.000141579	0.000283158	0.0418776	Up
BLUM_RESPONSE_TO_SALIRASIB_DN	417	0.000981699	0.999847	0.000152623	0.000305247	0.0418776	Up
KINSEY_TARGETS_OF_EWSR1_FLII_FUSION_UP	1398	0.00275	0.999847	0.000153495	0.000306991	0.0418776	Up
WINNEPENNINCKX_MELANOMA_METASTASIS_UP	179	0.0013819	0.999841	0.000159485	0.00031897	0.0418776	Up
LI_WILMS_TUMOR_VS_FETAL_KIDNEY_1_DN	200	0.00176784	0.99984	0.00016007	0.000320141	0.0418776	Up
KRIGE_RESPONSE_TO_TOSEDOSTAT_6HR_DN	928	-0.000835621	0.999834	0.000165612	0.000331225	0.0418776	Up
BIDUS_METASTASIS_UP	263	-0.00232126	0.999832	0.000168302	0.000336604	0.0418776	Up
PUJANA_BRCA_CENTERED_NETWORK	140	-0.00554523	0.999829	0.000171486	0.000342972	0.0418776	Up	Pujana et al, Nat Genet, 2007
DIAZ_CHRONIC_MEYLOGENOUS_LEUKEMIA_UP	1749	-0.000260494	0.999827	0.000173473	0.000346946	0.0418776	Up
SHEDDEN_LUNG_CANCER_POOR_SURVIVAL_A6	541	0.0030909	0.999793	0.00020735	0.0004147	0.0461233	Up
TOYOTA_TARGETS_OF_MIR34B_AND_MIR34C	519	-0.00169723	0.999788	0.000212289	0.000424578	0.0461233	Up
LINDGREN_BLADDER_CANCER_CLUSTER_3_UP	363	-0.000297005	0.999776	0.000224213	0.000448425	0.0461948	Up
SONG_TARGETS_OF_IE86_CMV_PROTEIN	68	-0.00324861	0.999767	0.000232537	0.000465073	0.0461948	Up
NUYTTEN_EZH2_TARGETS_DN	1004	0.000859653	0.999766	0.00023388	0.00046776	0.0461948	Up	Nuytten et al, Oncogene, 2008
DODD_NASOPHARYNGEAL_CARCINOMA_DN	1435	0.00189583	0.999741	0.000258961	0.000517922	0.0463773	Up
CROONQUIST_IL6_DEPRIVATION_DN	94	0.0116825	0.999741	0.000259237	0.000518475	0.0463773	Up
GRAHAM_NORMAL_QUIESCENT_VS_NORMAL_DIVIDING_DN	95	0.0066941	0.999737	0.000263125	0.00052625	0.0463773	Up
ZHAN_MULTIPLE_MYELOMA_PR_UP	46	0.00114778	0.999737	0.000263265	0.000526529	0.0463773	Up
LEE_EARLY_T_LYMPHOCYTE_UP	80	-0.00771835	0.999678	0.00032193	0.000643861	0.0507739	Up
RHEIN_ALL_GLUCOCORTICOID_THERAPY_DN	447	-0.00175468	0.999671	0.000328804	0.000657607	0.0507739	Up
FERREIRA_EWINGS_SARCOMA_UNSTABLE_VS_STABLE_UP	154	0.00107235	0.99967	0.000330373	0.000660745	0.0507739	Up
LY_AGING_OLD_DN	59	-0.00650603	0.999664	0.000335649	0.000671298	0.0507739	Up
CROONQUIST_NRAS_SIGNALING_DN	80	0.012548	0.999657	0.000343355	0.000686711	0.0507739	Up
RUIZ_TNC_TARGETS_DN	153	0.00308869	0.999651	0.000349072	0.000698143	0.0507739	Up
WEI_MYCN_TARGETS_WITH_E_BOX	908	0.00359813	0.99964	0.000360021	0.000720041	0.0507739	Up
BERENJENO_TRANSFORMED_BY_RHOA_UP	659	0.00812737	0.999631	0.000368864	0.000737728	0.0507739	Up
DANG_MYC_TARGETS_UP	174	-0.00215069	0.99962	0.00038008	0.00076016	0.0507739	Up	Zeller et al, Genome Biol, 2003
ODONNELL_TARGETS_OF_MYC_AND_TFRC_DN	54	0.00184443	0.999615	0.000384519	0.000769039	0.0507739	Up
MISSIAGLIA_REGULATED_BY_METHYLATION_DN	119	-0.00157219	0.999612	0.00038766	0.000775319	0.0507739	Up
REACTOME_CELL_CYCLE_MITOTIC	400	0.00544131	0.999611	0.00038949	0.00077898	0.0507739	Up
GARGALOVIC_RESPONSE_TO_OXIDIZED_PHOSPHOLIPIDS_TURQUOISE_DN	62	-0.00028713	0.999595	0.000404808	0.000809615	0.0513341	Up
MITSIADES_RESPONSE_TO_APLIDIN_DN	311	0.00406639	0.99959	0.000409539	0.000819077	0.0513341	Up
MARKEY_RB1_ACUTE_LOF_DN	255	0.00358842	0.999567	0.000433056	0.000866112	0.0514187	Up
PUJANA_BREAST_CANCER_WITH_BRCA1_MUTATED_UP	83	0.00992165	0.999554	0.000445971	0.000891941	0.0514187	Up
KAUFFMANN_MELANOMA_RELAPSE_UP	70	-0.00408941	0.99955	0.000449657	0.000899314	0.0514187	Up
REACTOME_G2_M_CHECKPOINTS	69	0.00222978	0.999512	0.000487999	0.000975997	0.0548409	Up
MORI_IMMATURE_B_LYMPHOCYTE_DN	63	0.00498259	0.999493	0.000506997	0.00101399	0.0560103	Up
REACTOME_ACTIVATION_OF_ATR_IN_RESPONSE_TO_REPLICATION_STRESS	60	-0.00303893	0.999448	0.000552063	0.00110413	0.0577732	Up
WEST_ADRENOCORTICAL_TUMOR_UP	385	-0.000402669	0.999435	0.000565163	0.00113033	0.0577732	Up
PUJANA_ATM_PCC_NETWORK	1383	0.000867883	0.999433	0.000567273	0.00113455	0.0577732	Up
VECCHI_GASTRIC_CANCER_EARLY_UP	418	0.00337929	0.9994	0.000600439	0.00120088	0.0581197	Up
REN_BOUND_BY_E2F	68	-0.0119304	0.999389	0.000610667	0.00122133	0.0581197	Up	Ren et al, Genes Dev, 2002
SHEPARD_CRUSH_AND_BURN_MUTANT_DN	144	-0.00168118	0.999379	0.000621136	0.00124227	0.0581197	Up
SCIAN_CELL_CYCLE_TARGETS_OF_TP53_AND_TP73_DN	36	-0.0150856	0.999376	0.000624176	0.00124835	0.0581197	Up
BENPORATH_CYCLING_GENES	743	0.00297641	0.999298	0.000701781	0.00140356	0.0635079	Up
GARCIA_TARGETS_OF_FLI1_AND_DAX1_DN	176	0.000316973	0.999268	0.000732369	0.00146474	0.0635079	Up
ROSTY_CERVICAL_CANCER_PROLIFERATION_CLUSTER	159	0.0214061	0.999267	0.000733131	0.00146626	0.0635079	Up
SCHUHMACHER_MYC_TARGETS_UP	89	-0.0074173	0.999247	0.000753024	0.00150605	0.0635079	Up	Schuhmacher et al, Nucleic Acids Res, 2001
SHEPARD_BMYB_TARGETS	63	-0.00950289	0.999246	0.000753837	0.00150767	0.0635079	Up
NAKAYAMA_SOFT_TISSUE_TUMORS_PCA2_UP	83	0.00539071	0.999246	0.00075394	0.00150788	0.0635079	Up
FARMER_BREAST_CANCER_CLUSTER_2	33	-0.0233829	0.99924	0.00075999	0.00151998	0.0635079	Up
KANG_DOXORUBICIN_RESISTANCE_UP	77	0.0256673	0.999217	0.000783288	0.00156658	0.0646262	Up
SHIPP_DLBCL_VS_FOLLICULAR_LYMPHOMA_UP	64	0.00178699	0.999144	0.000856485	0.00171297	0.0664591	Up
GARY_CD5_TARGETS_DN	518	0.00384027	0.999078	0.000921716	0.00184343	0.0687246	Up
VERNELL_RETINOBLASTOMA_PATHWAY_UP	59	-0.00971101	0.999066	0.000933922	0.00186784	0.0687246	Up
REACTOME_ACTIVATION_OF_THE_PRE_REPLICATIVE_COMPLEX	35	-0.00845683	0.999037	0.00096324	0.00192648	0.0687246	Up
CASORELLI_ACUTE_PROMYELOCYTIC_LEUKEMIA_DN	795	0.00335702	0.99903	0.000970032	0.00194006	0.0687246	Up
REACTOME_CELL_CYCLE_CHECKPOINTS	159	0.00531959	0.999002	0.000998368	0.00199674	0.0692273	Up
REACTOME_MITOTIC_PROMETAPHASE	128	0.016974	0.998931	0.00106937	0.00213874	0.0726058	Up
SMID_BREAST_CANCER_BASAL_UP	556	-0.000349405	0.998883	0.00111721	0.00223443	0.0731804	Up
BENPORATH_PROLIFERATION	171	0.0119285	0.998877	0.00112274	0.00224549	0.0731804	Up
LEE_LIVER_CANCER_SURVIVAL_DN	142	-0.00170613	0.998826	0.00117409	0.00234819	0.0734016	Up
ZHANG_RESPONSE_TO_CANTHARIDIN_DN	77	0.000149541	0.998787	0.00121333	0.00242667	0.0734016	Up
CHANG_CYCLING_GENES	63	0.0180856	0.998765	0.00123501	0.00247002	0.0734016	Up
GRAHAM_CML_QUIESCENT_VS_NORMAL_QUIESCENT_UP	79	-0.00150783	0.998747	0.00125319	0.00250638	0.0734016	Up
REACTOME_S_PHASE	148	0.00251605	0.998713	0.00128682	0.00257363	0.0737011	Up
FURUKAWA_DUSP6_TARGETS_PCI35_DN	78	-0.00722356	0.998636	0.00136409	0.00272818	0.0762692	Up
MORI_EMU_MYC_LYMPHOMA_BY_ONSET_TIME_UP	135	0.000972798	0.998621	0.00137939	0.00275877	0.0762692	Up
NAKAMURA_CANCER_MICROENVIRONMENT_DN	61	-0.00889696	0.998615	0.00138478	0.00276957	0.0762692	Up
ODONNELL_TFRC_TARGETS_DN	128	0.0114086	0.998597	0.00140268	0.00280536	0.0762692	Up
KEGG_CELL_CYCLE	162	0.00228205	0.998579	0.00142062	0.00284124	0.0762692	Up
REACTOME_MITOTIC_M_M_G1_PHASES	215	0.0155023	0.998576	0.00142385	0.0028477	0.0762692	Up
LOPEZ_MESOTELIOMA_SURVIVAL_TIME_UP	23	0.011937	0.99856	0.00144018	0.00288036	0.0763179	Up
FUJII_YBX1_TARGETS_DN	191	0.00697431	0.998516	0.00148403	0.00296805	0.0769201	Up
EGUCHI_CELL_CYCLE_RB1_TARGETS	20	0.0259998	0.998505	0.00149504	0.00299008	0.0769201	Up
PENG_GLUTAMINE_DEPRIVATION_DN	111	0.00245858	0.9985	0.00150002	0.00300005	0.0769201	Up
LY_AGING_MIDDLE_DN	21	0.0411335	0.998489	0.00151055	0.0030211	0.0769201	Up
NADERI_BREAST_CANCER_PROGNOSIS_UP	38	-0.00726723	0.998421	0.00157878	0.00315757	0.0780596	Up
RODRIGUES_THYROID_CARCINOMA_POORLY_DIFFERENTIATED_UP	769	0.00598426	0.998408	0.00159183	0.00318366	0.0780596	Up
WELCSH_BRCA1_TARGETS_1_DN	171	-0.00348174	0.998362	0.00163777	0.00327553	0.0790148	Up	Welcsh et al, PNAS, 2002
GRADE_COLON_CANCER_UP	852	-0.0010685	0.998351	0.00164867	0.00329733	0.0790148	Up
STEIN_ESRRA_TARGETS_RESPONSIVE_TO_ESTROGEN_DN	63	-0.0103877	0.998253	0.00174726	0.00349452	0.0830532	Up
SCHLOSSER_MYC_TARGETS_REPRESSED_BY_SERUM	199	0.00505236	0.998242	0.00175841	0.00351683	0.0830532	Up
BOYAULT_LIVER_CANCER_SUBCLASS_G3_UP	242	0.00617664	0.998175	0.00182511	0.00365023	0.0850056	Up
HOFFMANN_LARGE_TO_SMALL_PRE_BII_LYMPHOCYTE_UP	116	0.017706	0.998174	0.00182583	0.00365167	0.0850056	Up
PUJANA_BREAST_CANCER_LIT_INT_NETWORK	146	0.00104151	0.998079	0.00192079	0.00384158	0.0871941	Up
FINETTI_BREAST_CANCER_KINOME_RED	13	-0.0269283	0.998047	0.00195311	0.00390621	0.0871941	Up
FINETTI_BREAST_CANCER_BASAL_VS_LUMINAL	13	-0.0269283	0.998047	0.00195311	0.00390621	0.0871941	Up
RHODES_UNDIFFERENTIATED_CANCER	78	0.0152204	0.997994	0.0020061	0.0040122	0.0879275	Up
SCHLOSSER_MYC_TARGETS_AND_SERUM_RESPONSE_DN	53	0.00159822	0.997944	0.00205574	0.00411149	0.0879275	Up
KIM_WT1_TARGETS_DN	555	-0.000741201	0.997927	0.00207271	0.00414541	0.0879275	Up
LY_AGING_PREMATURE_DN	30	0.00293287	0.997916	0.00208408	0.00416815	0.0879275	Up
BHATTACHARYA_EMBRYONIC_STEM_CELL	87	-0.00892314	0.997908	0.00209245	0.00418491	0.0879275	Up
BOYAULT_LIVER_CANCER_SUBCLASS_G23_UP	64	0.00893716	0.997896	0.00210408	0.00420817	0.0879275	Up
REACTOME_SNRNP_ASSEMBLY	74	0.000641797	0.997837	0.00216308	0.00432616	0.0879275	Up
BENPORATH_ES_1	401	0.00689849	0.997822	0.00217763	0.00435527	0.0879275	Up
SMID_BREAST_CANCER_LUMINAL_A_DN	25	0.0541922	0.997822	0.00217799	0.00435599	0.0879275	Up
PENG_LEUCINE_DEPRIVATION_DN	71	0.00498859	0.9978	0.00219973	0.00439945	0.0879275	Up
REACTOME_REV_MEDIATED_NUCLEAR_EXPORT_OF_HIV1_RNA	41	-0.00775832	0.997779	0.00222088	0.00444176	0.0879275	Up
MOLENAAR_TARGETS_OF_CCND1_AND_CDK4_DN	54	0.0136875	0.997772	0.00222808	0.00445616	0.0879275	Up
REACTOME_G1_S_TRANSITION	132	0.00943656	0.997764	0.00223592	0.00447184	0.0879275	Up
CHIANG_LIVER_CANCER_SUBCLASS_PROLIFERATION_UP	147	0.00876995	0.997749	0.00225073	0.00450146	0.0879275	Up
STEIN_ESR1_TARGETS	85	-0.00130549	0.997732	0.00226751	0.00453502	0.0879275	Up
VANTVEER_BREAST_CANCER_METASTASIS_DN	117	0.00727358	0.997711	0.002289	0.00457799	0.0879275	Up
REACTOME_TRANSPORT_OF_MATURE_MRNA_DERIVED_FROM_AN_INTRON_CONTAINING_TRANSCRIPT	54	-0.00698858	0.997685	0.00231469	0.00462939	0.0882291	Up
REACTOME_HOST_INTERACTIONS_OF_HIV_FACTORS	154	0.0028304	0.99766	0.00233952	0.00467905	0.0886571	Up
REACTOME_DNA_STRAND_ELONGATION	46	0.0060545	0.997629	0.00237107	0.00474214	0.0888198	Up
MARTINEZ_RESPONSE_TO_TRABECTEDIN_DN	270	0.00163495	0.997604	0.00239576	0.00479152	0.0892318	Up
REACTOME_E2F_MEDIATED_REGULATION_OF_DNA_REPLICATION	35	0.00643262	0.997518	0.00248213	0.00496425	0.0916173	Up
CHIANG_LIVER_CANCER_SUBCLASS_UNANNOTATED_DN	198	0.00097384	0.997512	0.00248792	0.00497584	0.0916173	Up
BASAKI_YBX1_TARGETS_UP	351	0.016576	0.997498	0.00250204	0.00500409	0.0916198	Up
BIOCARTA_RANMS_PATHWAY	12	-0.0679474	0.997472	0.00252771	0.00505543	0.0920427	Up
MATTIOLI_MGUS_VS_PCL	125	-0.00472913	0.997445	0.00255545	0.00511089	0.092527	Up
BIOCARTA_SRCRPTP_PATHWAY	18	-0.0236831	0.997375	0.00262496	0.00524993	0.0940083	Up
BORCZUK_MALIGNANT_MESOTHELIOMA_UP	402	0.000913798	0.997273	0.00272738	0.00545476	0.0957418	Up
TANG_SENESCENCE_TP53_TARGETS_DN	46	0.00991076	0.997253	0.00274681	0.00549362	0.0957418	Up
AMUNDSON_GAMMA_RADIATION_RESPONSE	38	0.0217303	0.99715	0.00284959	0.00569918	0.098796	Up
FOURNIER_ACINAR_DEVELOPMENT_LATE_DN	31	-0.0183689	0.997103	0.00289694	0.00579388	0.0994976	Up
YAO_TEMPORAL_RESPONSE_TO_PROGESTERONE_CLUSTER_11	134	0.00507654	0.997069	0.00293089	0.00586178	0.0994976	Up
REACTOME_VPR_MEDIATED_NUCLEAR_IMPORT_OF_PICS	45	-0.00606865	0.997047	0.00295317	0.00590633	0.0997344	Up
KUMAMOTO_RESPONSE_TO_NUTLIN_3A_DN	13	0.0554851	0.996995	0.00300535	0.0060107	0.100974	Up
BASSO_B_LYMPHOCYTE_NETWORK	182	0.00213799	0.996963	0.00303706	0.00607412	0.101161	Up
VANTVEER_BREAST_CANCER_BRCA1_UP	40	-0.0158634	0.996943	0.00305748	0.00611495	0.101161	Up	van't Veer et al, Nature, 2002
MONTERO_THYROID_CANCER_POOR_SURVIVAL_UP	12	0.0505225	0.9969	0.00309983	0.00619967	0.101531	Up
KIM_WT1_TARGETS_12HR_DN	267	-0.00198845	0.996868	0.0031321	0.0062642	0.102075	Up
FRASOR_RESPONSE_TO_SERM_OR_FULVESTRANT_DN	57	0.0340138	0.996849	0.00315113	0.00630226	0.102184	Up
GAL_LEUKEMIC_STEM_CELL_DN	200	4.76847e-05	0.996786	0.00321423	0.00642846	0.102838	Up
SARRIO_EPITHELIAL_MESENCHYMAL_TRANSITION_UP	15	-0.0350707	0.996782	0.00321806	0.00643611	0.102838	Up
REACTOME_E2F_TRANSCRIPTIONAL_TARGETS_AT_G1_S	23	-0.0252416	0.996781	0.00321863	0.00643725	0.102838	Up
HESS_TARGETS_OF_HOXA9_AND_MEIS1_UP	76	0.000817225	0.996746	0.00325418	0.00650835	0.102965	Up
REACTOME_NUCLEAR_IMPORT_OF_REV_PROTEIN	39	-0.00361266	0.996706	0.00329386	0.00658773	0.103717	Up
MENSSEN_MYC_TARGETS	27	-0.0164431	0.996679	0.00332141	0.00664283	0.10397	Up	Menssen and Hermeking, PNAS, 2002
REACTOME_PROCESSING_OF_CAPPED_INTRON_CONTAINING_PRE_MRNA	180	0.0134308	0.996649	0.00335108	0.00670217	0.10397	Up
REACTOME_PURINE_RIBONUCLEOSIDE_MONOPHOSPHATE_BIOSYNTHESIS	17	-0.00951404	0.99663	0.00337042	0.00674084	0.10397	Up
REACTOME_METABOLISM_OF_RNA	143	0.00525662	0.996512	0.00348756	0.00697513	0.105855	Up
REACTOME_TRANSPORT_OF_RIBONUCLEOPROTEINS_INTO_THE_HOST_NUCLEUS	38	-0.00825551	0.996326	0.00367413	0.00734826	0.108362	Up
REACTOME_REGULATION_OF_APC_ACTIVATORS_BETWEEN_G1_S_AND_EARLY_ANAPHASE	94	0.0087743	0.996282	0.00371842	0.00743685	0.109174	Up
NAKAMURA_TUMOR_ZONE_PERIPHERAL_VS_CENTRAL_UP	330	0.00463669	0.99617	0.00383001	0.00766003	0.111946	Up
REACTOME_DNA_REPLICATION_PRE_INITIATION	98	0.0129851	0.996068	0.00393216	0.00786431	0.113519	Up
VANHARANTA_UTERINE_FIBROID_WITH_7Q_DELETION_UP	88	-0.00917053	0.996049	0.0039509	0.0079018	0.113519	Up
REACTOME_SYNTHESIS_OF_DNA	125	0.00975985	0.996013	0.00398663	0.00797326	0.113519	Up
REACTOME_CYCLIN_A1_ASSOCIATED_EVENTS_DURING_G2_M_TRANSITION	15	-0.0382028	0.996012	0.00398833	0.00797666	0.113519	Up
GRADE_COLON_AND_RECTAL_CANCER_UP	279	0.00937494	0.995977	0.00402303	0.00804606	0.114009	Up
REACTOME_NEP_NS2_INTERACTS_WITH_THE_CELLULAR_EXPORT_MACHINERY	37	-0.000770925	0.995958	0.00404151	0.00808302	0.114037	Up
REACTOME_GENE_EXPRESSION	512	0.00485134	0.995925	0.00407452	0.00814903	0.114473	Up
BENPORATH_ES_CORE_NINE_CORRELATED (breast cancer)	137	0.000729205	0.995778	0.00422194	0.00844388	0.114993	Up
REACTOME_INACTIVATION_OF_APC_VIA_DIRECT_INHIBITION_OF_THE_APCOMPLEX	20	-0.00476258	0.995764	0.00423629	0.00847258	0.114993	Up
DAIRKEE_CANCER_PRONE_RESPONSE_BPA_E2	125	-0.00583732	0.995751	0.0042494	0.0084988	0.114993	Up
REICHERT_G1S_REGULATORS_AS_PI3K_TARGETS	20	-0.0427837	0.995737	0.00426252	0.00852504	0.114993	Up
KEGG_PURINE_METABOLISM	166	0.00123171	0.995731	0.00426881	0.00853762	0.114993	Up
BILD_MYC_ONCOGENIC_SIGNATURE	214	-6.50075e-05	0.995713	0.0042871	0.0085742	0.114993	Up	Bild et al, Nature, 2006
REACTOME_TRANSPORT_OF_THE_SLBP_INDEPENDENT_MATURE_MRNA	43	0.00328401	0.995682	0.00431841	0.00863682	0.115358	Up
REACTOME_REGULATION_OF_GLUCOKINASE_BY_GLUCOKINASE_REGULATORY_PROTEIN	36	-0.00411833	0.995488	0.00451186	0.00902372	0.118106	Up
CHANG_CORE_SERUM_RESPONSE_UP	81	0.0168963	0.995409	0.00459149	0.00918299	0.11829	Up
BOYLAN_MULTIPLE_MYELOMA_C_CLUSTER_UP	47	-0.0183856	0.995409	0.00459149	0.00918299	0.11829	Up
KEGG_DNA_REPLICATION	53	0.0168654	0.995351	0.0046492	0.0092984	0.118912	Up
COLLER_MYC_TARGETS_UP	20	-0.0115541	0.995318	0.00468206	0.00936411	0.119157	Up	Coller et al, PNAS, 2000
REACTOME_GLUCOSE_TRANSPORT	39	-0.00678838	0.995243	0.00475721	0.00951442	0.119157	Up
REACTOME_EXTENSION_OF_TELOMERES	38	-0.0138863	0.995227	0.00477331	0.00954662	0.119157	Up
FERRANDO_T_ALL_WITH_MLL_ENL_FUSION_DN	90	0.00388664	0.995072	0.00492845	0.0098569	0.119731	Up
LINDGREN_BLADDER_CANCER_CLUSTER_1_DN	438	0.00129226	0.994919	0.00508143	0.0101629	0.121811	Up
MORI_LARGE_PRE_BII_LYMPHOCYTE_UP	67	0.0375972	0.994815	0.00518522	0.0103704	0.121823	Up
YU_MYC_TARGETS_UP	48	0.0544338	0.994791	0.00520916	0.0104183	0.121823	Up	Yu et al, Ann N Y Acad Sci, 2005
ELVIDGE_HYPOXIA_DN	190	-0.00387309	0.994709	0.00529142	0.0105828	0.123177	Up
SLEBOS_HEAD_AND_NECK_CANCER_WITH_HPV_UP	71	-0.00540213	0.994427	0.00557334	0.0111467	0.125266	Up
SCIBETTA_KDM5B_TARGETS_DN	99	-0.00254064	0.994286	0.00571435	0.0114287	0.126564	Up
WINTER_HYPOXIA_UP	104	-0.00507069	0.994272	0.00572818	0.0114564	0.126564	Up
PRAMOONJAGO_SOX4_TARGETS_DN	83	0.00598154	0.99421	0.00578997	0.0115799	0.126908	Up
YAO_TEMPORAL_RESPONSE_TO_PROGESTERONE_CLUSTER_14	192	0.013668	0.994095	0.00590473	0.0118095	0.126908	Up
KAUFFMANN_DNA_REPAIR_GENES	242	0.00531031	0.994089	0.0059107	0.0118214	0.126908	Up
DANG_REGULATED_BY_MYC_UP	89	0.00594318	0.994067	0.00593252	0.011865	0.126908	Up	Zeller et al, Genome Biol, 2003
ZHAN_VARIABLE_EARLY_DIFFERENTIATION_GENES_DN	38	-0.00901535	0.994062	0.00593846	0.0118769	0.126908	Up
BOYAULT_LIVER_CANCER_SUBCLASS_G123_UP	47	0.00728745	0.993986	0.00601383	0.0120277	0.127916	Up
BHATI_G2M_ARREST_BY_2METHOXYESTRADIOL_UP	119	0.00591198	0.993728	0.00627183	0.0125437	0.129961	Up
REACTOME_HIV_INFECTION	236	0.00908638	0.993719	0.00628074	0.0125615	0.129961	Up
VANTVEER_BREAST_CANCER_ESR1_DN	232	0.00408589	0.993671	0.00632946	0.0126589	0.130515	Up
LI_CYTIDINE_ANALOG_PATHWAY	15	-0.0454189	0.993622	0.00637773	0.0127555	0.130515	Up
RAMALHO_STEMNESS_UP	280	0.000883921	0.993612	0.00638761	0.0127752	0.130515	Up
MOREAUX_B_LYMPHOCYTE_MATURATION_BY_TACI_DN	51	-0.00557011	0.993434	0.00656561	0.0131312	0.132082	Up
RICKMAN_TUMOR_DIFFERENTIATED_MODERATELY_VS_POORLY_UP	40	0.0232154	0.993274	0.00672649	0.013453	0.133262	Up
RICKMAN_TUMOR_DIFFERENTIATED_MODERATELY_VS_POORLY_DN	40	0.0232154	0.993274	0.00672649	0.013453	0.133262	Up
BIOCARTA_AKAP95_PATHWAY	18	-0.00414107	0.993113	0.00688657	0.0137731	0.134795	Up
RHODES_CANCER_META_SIGNATURE	70	0.000749928	0.99302	0.00697988	0.0139598	0.135313	Up
PUIFFE_INVASION_INHIBITED_BY_ASCITES_UP	109	0.00346076	0.993004	0.00699607	0.0139921	0.135313	Up
REACTOME_MRNA_SPLICING	141	0.0207323	0.992395	0.0076051	0.0152102	0.13986	Up
DANG_BOUND_BY_MYC	1237	0.00199986	0.992383	0.00761744	0.0152349	0.13986	Up	Zeller et al, Genome Biol, 2003
KEGG_SPLICEOSOME	161	0.0201111	0.992247	0.00775338	0.0155068	0.140738	Up
REACTOME_CONVERSION_FROM_APC_CDC20_TO_APC_CDH1_IN_LATE_ANAPHASE	19	-0.0254103	0.992224	0.00777646	0.0155529	0.140738	Up
SEMBA_FHIT_TARGETS_DN	14	0.0368574	0.992127	0.00787345	0.0157469	0.1413	Up
CHEMNITZ_RESPONSE_TO_PROSTAGLANDIN_E2_UP	152	0.0154663	0.991941	0.0080591	0.0161182	0.141987	Up
CHIARETTI_T_ALL_RELAPSE_PROGNOSIS	15	0.0449842	0.991879	0.0081213	0.0162426	0.141987	Up
KEGG_ONE_CARBON_POOL_BY_FOLATE	24	-0.0104715	0.991876	0.00812404	0.0162481	0.141987	Up
ONDER_CDH1_TARGETS_1_DN	162	0.00562017	0.991814	0.00818565	0.0163713	0.141987	Up
REACTOME_PURINE_METABOLISM	35	0.00197218	0.991756	0.00824449	0.016489	0.141987	Up
GRAHAM_CML_QUIESCENT_VS_CML_DIVIDING_DN	5	-0.102333	0.991705	0.00829549	0.016591	0.141987	Up
GOLDRATH_ANTIGEN_RESPONSE	349	0.0113297	0.991666	0.00833418	0.0166684	0.141987	Up
MONNIER_POSTRADIATION_TUMOR_ESCAPE_UP	526	0.0031506	0.99165	0.00835045	0.0167009	0.141987	Up
MOOTHA_HUMAN_MITODB_6_2002	528	-0.000489514	0.991589	0.0084113	0.0168226	0.141987	Up
REACTOME_PREFOLDIN_MEDIATED_TRANSFER_OF_SUBSTRATE_TO_CCT_TRIC	35	-0.00841607	0.99158	0.00841996	0.0168399	0.141987	Up
PYEON_HPV_POSITIVE_TUMORS_UP	81	0.00468421	0.991576	0.00842361	0.0168472	0.141987	Up
REACTOME_CHAPERONIN_MEDIATED_PROTEIN_FOLDING	60	-0.00678652	0.991509	0.00849109	0.0169822	0.141987	Up
MOHANKUMAR_TLX1_TARGETS_UP	498	0.00331177	0.99143	0.00857033	0.0171407	0.141987	Up
REACTOME_HIV_LIFE_CYCLE	139	0.013007	0.991375	0.00862516	0.0172503	0.141987	Up
MANN_RESPONSE_TO_AMIFOSTINE_DN	13	-0.0075212	0.991373	0.0086271	0.0172542	0.141987	Up
GENTILE_UV_RESPONSE_CLUSTER_D4	65	0.000972673	0.991347	0.0086527	0.0173054	0.141987	Up
VANTVEER_BREAST_CANCER_POOR_PROGNOSIS	49	0.002454	0.991326	0.00867356	0.0173471	0.141987	Up
REACTOME_SCF_BETA_TRCP_MEDIATED_DEGRADATION_OF_EMI1	69	0.00545969	0.991288	0.00871235	0.0174247	0.141987	Up
KEGG_PYRIMIDINE_METABOLISM	122	0.00577634	0.991263	0.00873669	0.0174734	0.141987	Up
REACTOME_LATE_PHASE_OF_HIV_LIFE_CYCLE	119	0.00940881	0.991062	0.00893848	0.017877	0.143522	Up
BOYLAN_MULTIPLE_MYELOMA_C_UP	31	-0.0247222	0.990902	0.00909779	0.0181956	0.145294	Up
MORI_MATURE_B_LYMPHOCYTE_DN	66	-0.0133305	0.990883	0.00911712	0.0182342	0.145294	Up
KEGG_BASE_EXCISION_REPAIR	43	-0.0182754	0.990726	0.00927353	0.0185471	0.146711	Up
REACTOME_METABLISM_OF_NUCLEOTIDES	96	0.0251611	0.990569	0.00943067	0.0188613	0.148476	Up
MOREAUX_MULTIPLE_MYELOMA_BY_TACI_DN	135	0.0052321	0.990493	0.0095071	0.0190142	0.14901	Up
BROWNE_HCMV_INFECTION_14HR_UP	176	-3.15108e-05	0.99049	0.00951029	0.0190206	0.14901	Up
REACTOME_CDC20_PHOSPHO_APC_MEDIATED_DEGRADATION_OF_CYCLIN_A	80	0.0154163	0.990334	0.00966583	0.0193317	0.150362	Up
REACTOME_MRNA_3_END_PROCESSING	33	0.00210668	0.990103	0.0098967	0.0197934	0.152465	Up
REACTOME_LAGGING_STRAND_SYNTHESIS	30	-0.00673502	0.990069	0.00993143	0.0198629	0.152465	Up
BIOCARTA_PTC1_PATHWAY	14	0.0483024	0.989884	0.0101158	0.0202316	0.153493	Up
PAL_PRMT5_TARGETS_UP	235	0.00641148	0.989636	0.0103636	0.0207272	0.15381	Up
BIOCARTA_GLYCOLYSIS_PATHWAY	14	-0.0265056	0.989601	0.0103993	0.0207986	0.15381	Up
FERRANDO_HOX11_NEIGHBORS	15	-0.0320827	0.989546	0.0104538	0.0209076	0.15381	Up
BENPORATH_MYC_MAX_TARGETS	944	0.00244544	0.989485	0.0105153	0.0210305	0.154366	Up
BIOCARTA_SKP2E2F_PATHWAY	18	-0.0012226	0.989119	0.0108814	0.0217627	0.159024	Up
BROWNE_HCMV_INFECTION_18HR_UP	206	-0.0036808	0.988928	0.0110719	0.0221438	0.160015	Up
KEGG_MISMATCH_REPAIR	36	-0.00893226	0.988336	0.011664	0.0233281	0.16463	Up
SENGUPTA_NASOPHARYNGEAL_CARCINOMA_UP	291	0.00648807	0.988298	0.0117023	0.0234045	0.16463	Up
KALMA_E2F1_TARGETS	20	0.0587223	0.988213	0.0117872	0.0235744	0.16463	Up	Kalma et al, Oncogene, 2001
WAESCH_ANAPHASE_PROMOTING_COMPLEX	9	-0.0593657	0.988181	0.0118187	0.0236374	0.16463	Up
MMS_MOUSE_LYMPH_HIGH_4HRS_UP	36	0.000999386	0.988164	0.0118357	0.0236715	0.16463	Up
KEGG_RNA_DEGRADATION	71	0.0110995	0.988008	0.0119916	0.0239832	0.165948	Up
CHAUHAN_RESPONSE_TO_METHOXYESTRADIOL_UP	62	0.0121182	0.987942	0.0120582	0.0241165	0.166164	Up
OLSSON_E2F3_TARGETS_DN	29	-0.0127547	0.987806	0.012194	0.024388	0.1673	Up	Olsson et al, Oncogene, 2007
RODRIGUES_THYROID_CARCINOMA_ANAPLASTIC_UP	811	0.00886912	0.987757	0.0122434	0.0244867	0.1673	Up
CHOW_RASSF1_TARGETS_UP	39	-0.00169009	0.987656	0.0123435	0.0246871	0.168216	Up
RICKMAN_TUMOR_DIFFERENTIATED_WELL_VS_POORLY_UP	267	0.00386507	0.987633	0.0123668	0.0247336	0.168216	Up
NUYTTEN_NIPP1_TARGETS_DN	871	-0.000692342	0.98761	0.0123895	0.024779	0.168216	Up	Nuytten et al, Oncogene, 2008
REACTOME_UNWINDING_OF_DNA	16	0.110304	0.987586	0.0124136	0.0248273	0.168216	Up
BIOCARTA_PROTEASOME_PATHWAY	24	0.00426036	0.987191	0.0128092	0.0256184	0.170744	Up
GEORGES_CELL_CYCLE_MIR192_TARGETS	74	0.0133075	0.987138	0.0128621	0.0257243	0.170744	Up
MOOTHA_MITOCHONDRIA	531	-0.000273659	0.987016	0.0129845	0.0259689	0.171321	Up
SANA_RESPONSE_TO_IFNG_DN	99	0.00683661	0.986881	0.0131193	0.0262386	0.172336	Up
KORKOLA_EMBRYONAL_CARCINOMA_UP	41	-0.0177522	0.986842	0.0131577	0.0263155	0.172336	Up
YAO_TEMPORAL_RESPONSE_TO_PROGESTERONE_CLUSTER_10	64	-0.0038507	0.986576	0.0134244	0.0268489	0.175001	Up
REACTOME_FORMATION_AND_MATURATION_OF_MRNA_TRANSCRIPT	205	0.0208742	0.986489	0.0135105	0.027021	0.175771	Up
REACTOME_APCDC20_MEDIATED_DEGRADATION_OF_CYCLIN_B	20	0.0448943	0.986419	0.0135813	0.0271626	0.17599	Up
REACTOME_AUTODEGRADATION_OF_CDH1_BY_CDH1_APC	72	0.0056785	0.986255	0.0137445	0.0274891	0.1774	Up
NAKAMURA_LUNG_CANCER	4	-0.0203052	0.986064	0.0139364	0.0278727	0.177722	Up
NAKAMURA_LUNG_CANCER_MARKERS	4	-0.0203052	0.986064	0.0139364	0.0278727	0.177722	Up
SESTO_RESPONSE_TO_UV_C1	67	-0.0103714	0.985959	0.0140411	0.0280821	0.178054	Up
CHANDRAN_METASTASIS_TOP50_UP	16	-0.0423716	0.985875	0.0141255	0.0282509	0.178399	Up
REACTOME_SCF_SKP2_MEDIATED_DEGRADATION_OF_P27_P21	76	0.00648831	0.985822	0.0141778	0.0283556	0.178399	Up
RIZ_ERYTHROID_DIFFERENTIATION	88	0.0155656	0.985788	0.0142122	0.0284245	0.178462	Up
BIOCARTA_MCM_PATHWAY	24	0.0669929	0.985762	0.0142376	0.0284751	0.178462	Up
REACTOME_G2_M_TRANSITION	96	0.0346408	0.985695	0.0143045	0.028609	0.178957	Up
HELLER_HDAC_TARGETS_DN	275	0.00474783	0.985288	0.014712	0.0294241	0.181272	Up	Heller et al, Cancer Res, 2008
LEE_METASTASIS_AND_RNA_PROCESSING_UP	17	-0.0330121	0.985194	0.0148059	0.0296118	0.181309	Up
LIANG_SILENCED_BY_METHYLATION_DN	12	-0.0434588	0.985184	0.0148157	0.0296315	0.181309	Up
UDAYAKUMAR_MED1_TARGETS_UP	167	0.00573414	0.985146	0.0148541	0.0297083	0.181309	Up
CROONQUIST_NRAS_VS_STROMAL_STIMULATION_DN	99	0.0237083	0.984974	0.0150265	0.030053	0.182083	Up
WU_APOPTOSIS_BY_CDKN1A_VIA_TP53	44	0.0625886	0.98491	0.0150905	0.0301809	0.18242	Up
ENK_UV_RESPONSE_KERATINOCYTE_DN	567	0.00257835	0.984887	0.015113	0.0302261	0.18242	Up
KAUFFMANN_DNA_REPLICATION_GENES	171	0.0161634	0.984795	0.0152054	0.0304108	0.182426	Up
ALCALAY_AML_BY_NPM1_LOCALIZATION_DN	167	0.0056796	0.984737	0.0152631	0.0305262	0.182426	Up
FARMER_BREAST_CANCER_BASAL_VS_LULMINAL	308	-0.00176534	0.984596	0.015404	0.030808	0.183509	Up
REACTOME_FORMATION_OF_TUBULIN_FOLDING_INTERMEDIATES_BY_CCT_TRIC	24	0.0565278	0.984466	0.0155343	0.0310686	0.183571	Up
MILI_PSEUDOPODIA_HAPTOTAXIS_UP	551	0.00428197	0.984207	0.0157933	0.0315865	0.184625	Up
OUELLET_CULTURED_OVARIAN_CANCER_INVASIVE_VS_LMP_UP	82	-0.00322679	0.983687	0.0163126	0.0326252	0.187854	Up
REACTOME_EARLY_PHASE_OF_HIV_LIFE_CYCLE	20	0.0103172	0.983369	0.0166306	0.0332611	0.190746	Up
BIOCARTA_P27_PATHWAY	22	0.00701147	0.983349	0.0166515	0.033303	0.190746	Up
XU_HGF_SIGNALING_NOT_VIA_AKT1_48HR_DN	22	0.0121582	0.982925	0.017075	0.03415	0.194232	Up
REACTOME_ELONGATION_AND_PROCESSING_OF_CAPPED_TRANSCRIPTS	180	0.0275787	0.982869	0.0171312	0.0342623	0.194531	Up
BROWNE_HCMV_INFECTION_24HR_UP	163	-0.00269169	0.982765	0.0172354	0.0344708	0.194819	Up
HEIDENBLAD_AMPLICON_8Q24_UP	26	-0.0250516	0.982713	0.0172868	0.0345736	0.194819	Up
REACTOME_POLYMERASE_SWITCHING	21	-0.0399371	0.982694	0.0173059	0.0346119	0.194819	Up
WANG_CISPLATIN_RESPONSE_AND_XPC_UP	115	-0.000750704	0.982479	0.0175207	0.0350414	0.195378	Up
SU_TESTIS	48	0.055905	0.982468	0.0175322	0.0350645	0.195378	Up
COLDREN_GEFITINIB_RESISTANCE_UP	82	-0.00513767	0.982465	0.0175355	0.035071	0.195378	Up
GOLDRATH_HOMEOSTATIC_PROLIFERATION	183	0.000273957	0.982322	0.0176785	0.035357	0.196636	Up
XU_CREBBP_TARGETS_UP	31	-0.00836804	0.981979	0.0180213	0.0360426	0.198952	Up
REACTOME_PHOSPHORYLATION_OF_THE_APC	16	0.0300685	0.981605	0.0183951	0.0367903	0.200837	Up
POMEROY_MEDULLOBLASTOMA_PROGNOSIS_DN	50	0.0158357	0.9814	0.0185999	0.0371998	0.202733	Up
WANG_SMARCE1_TARGETS_DN	332	0.00184915	0.981151	0.0188493	0.0376985	0.204254	Up
SAKAI_TUMOR_INFILTRATING_MONOCYTES_DN	93	0.0162673	0.981135	0.0188648	0.0377296	0.204254	Up
REACTOME_M_G1_TRANSITION	81	0.0355002	0.980737	0.0192631	0.0385261	0.207338	Up
REACTOME_REPAIR_SYNTHESIS_OF_PATCH_27_30_BASES_LONG_BY_DNA_POLYMERASE	23	0.0013316	0.980604	0.019396	0.038792	0.207338	Up
WAKASUGI_HAVE_ZNF143_BINDING_SITES	63	0.0161533	0.98056	0.0194403	0.0388806	0.207338	Up
BIOCARTA_G2_PATHWAY	34	-0.00679312	0.980395	0.0196049	0.0392098	0.207338	Up
CHIARADONNA_NEOPLASTIC_TRANSFORMATION_KRAS_UP	160	0.0106984	0.980365	0.0196349	0.0392699	0.207338	Up
KORKOLA_YOLK_SAC_TUMOR_UP	26	-0.0272957	0.980277	0.0197233	0.0394466	0.207338	Up
NGO_MALIGNANT_GLIOMA_1P_LOH	9	-0.012356	0.980024	0.0199755	0.0399511	0.208182	Up
SESTO_RESPONSE_TO_UV_C7	79	0.000193215	0.980009	0.0199912	0.0399825	0.208182	Up
REACTOME_DNA_REPAIR	126	0.0186287	0.980006	0.0199941	0.0399883	0.208182	Up
XU_RESPONSE_TO_TRETINOIN_AND_NSC682994_DN	18	0.0331912	0.97969	0.0203101	0.0406202	0.209135	Up
BIOCARTA_RB_PATHWAY	20	0.00782272	0.979653	0.0203474	0.0406948	0.209187	Up
LI_LUNG_CANCER	38	2.1564e-05	0.979411	0.0205886	0.0411771	0.211333	Up
MCMURRAY_TP53_HRAS_COOPERATION_RESPONSE_UP	33	0.0478392	0.979334	0.0206658	0.0413316	0.211792	Up
REACTOME_BETACATENIN_PHOSPHORYLATION_CASCADE	20	0.00381966	0.979038	0.0209621	0.0419242	0.213153	Up
GRASEMANN_RETINOBLASTOMA_WITH_6P_AMPLIFICATION	13	0.00670947	0.978846	0.0211545	0.0423089	0.213652	Up
HU_ANGIOGENESIS_DN	37	-0.0226506	0.978825	0.0211751	0.0423502	0.213652	Up
REACTOME_ORC1_REMOVAL_FROM_CHROMATIN	88	0.030386	0.978764	0.0212357	0.0424715	0.213785	Up
GUTIERREZ_WALDENSTROEMS_MACROGLOBULINEMIA_2	2	-0.539527	0.978681	0.0213195	0.0426389	0.213785	Up
MAYBURD_RESPONSE_TO_L663536_DN	56	0.00763483	0.978309	0.0216911	0.0433823	0.215706	Up
SPIELMAN_LYMPHOBLAST_EUROPEAN_VS_ASIAN_UP	615	0.00361905	0.978157	0.0218429	0.0436857	0.215943	Up
SAKAI_CHRONIC_HEPATITIS_VS_LIVER_CANCER_UP	90	0.00442657	0.978068	0.0219323	0.0438645	0.215943	Up
KOKKINAKIS_METHIONINE_DEPRIVATION_96HR_DN	80	0.00929241	0.977943	0.0220572	0.0441144	0.21638	Up
REACTOME_METABOLISM_OF_AMINO_ACIDS	143	-0.000684034	0.977916	0.022084	0.044168	0.21638	Up
REACTOME_CYCLIN_E_ASSOCIATED_EVENTS_DURING_G1_S_TRANSITION_	83	0.0140364	0.977618	0.0223819	0.0447639	0.217495	Up
KEGG_OOCYTE_MEIOSIS	136	0.00620388	0.977311	0.0226893	0.0453785	0.218125	Up
LIU_SOX4_TARGETS_DN	412	-0.000840849	0.977078	0.0229221	0.0458442	0.219393	Up
PENG_RAPAMYCIN_RESPONSE_DN	93	0.00764894	0.976977	0.0230226	0.0460452	0.219709	Up
TIEN_INTESTINE_PROBIOTICS_2HR_UP	42	0.0116507	0.976731	0.0232688	0.0465377	0.221734	Up
CAFFAREL_RESPONSE_TO_THC_8HR_3_DN	16	0.0748081	0.976558	0.0234422	0.0468843	0.222129	Up
DOANE_BREAST_CANCER_CLASSES_DN	38	0.00416619	0.976538	0.0234624	0.0469248	0.222129	Up
KEGG_UBIQUITIN_MEDIATED_PROTEOLYSIS	184	-0.00208868	0.976002	0.023998	0.047996	0.223883	Up
OUELLET_OVARIAN_CANCER_INVASIVE_VS_LMP_UP	142	-0.00240487	0.9756	0.0244003	0.0488006	0.226232	Up
SMID_BREAST_CANCER_RELAPSE_IN_BONE_DN	251	-0.00222373	0.975054	0.0249455	0.049891	0.22926	Up
REACTOME_ASSOCIATION_OF_TRIC_CCT_WITH_TARGET_PROTEINS_DURING_BIOSYNTHESIS	34	0.00545111	0.974744	0.0252556	0.0505112	0.230554	Up
CAFFAREL_RESPONSE_TO_THC_24HR_5_DN	53	-0.00460958	0.9746	0.0253998	0.0507995	0.231223	Up
BLALOCK_ALZHEIMERS_DISEASE_DN	1368	0.00126503	0.974243	0.025757	0.0515139	0.233219	Up
REACTOME_P53_INDEPENDENT_DNA_DAMAGE_RESPONSE	60	0.0148269	0.973995	0.0260051	0.0520103	0.233795	Up
CHEOK_RESPONSE_TO_MERCAPTOPURINE_AND_LD_MTX_UP	13	-0.0587117	0.973878	0.0261222	0.0522444	0.233958	Up
FAELT_B_CLL_WITH_VH3_21_UP	66	0.00151266	0.973517	0.0264834	0.0529668	0.233958	Up
YAO_TEMPORAL_RESPONSE_TO_PROGESTERONE_CLUSTER_17	223	0.0100047	0.973071	0.0269293	0.0538586	0.236455	Up
SCHLOSSER_MYC_AND_SERUM_RESPONSE_SYNERGY	42	0.0285558	0.972998	0.0270023	0.0540046	0.236561	Up
MORI_SMALL_PRE_BII_LYMPHOCYTE_DN	77	-0.00893631	0.97285	0.0271496	0.0542992	0.236974	Up
REACTOME_BASE_EXCISION_REPAIR	26	-0.0169545	0.972841	0.0271585	0.054317	0.236974	Up
CAIRO_HEPATOBLASTOMA_UP	249	-0.00219565	0.972334	0.0276662	0.0553324	0.239764	Up
REACTOME_STABILIZATION_OF_P53	67	0.00631756	0.972301	0.027699	0.055398	0.239764	Up
BOHN_PRIMARY_IMMUNODEFICIENCY_SYNDROM_UP	35	-0.00534128	0.972121	0.0278787	0.0557574	0.240362	Up
WEST_ADRENOCORTICAL_TUMOR_MARKERS_UP	17	-0.00221006	0.971408	0.0285915	0.0571831	0.243893	Up
REACTOME_CDT1_ASSOCIATION_WITH_THE_CDC6_ORC_ORIGIN_COMPLEX	66	0.0197571	0.971405	0.0285954	0.0571907	0.243893	Up
REACTOME_CENTROSOME_MATURATION	86	0.0559439	0.971375	0.0286251	0.0572501	0.243893	Up
POOLA_INVASIVE_BREAST_CANCER_UP	188	-0.00423027	0.971303	0.028697	0.057394	0.244187	Up
TOOKER_GEMCITABINE_RESISTANCE_DN	160	-0.000271144	0.971091	0.0289086	0.0578173	0.244192	Up
TOOKER_RESPONSE_TO_BEXAROTENE_UP	160	-0.000271144	0.971091	0.0289086	0.0578173	0.244192	Up
WANG_RESPONSE_TO_ANDROGEN_UP	30	-0.00925007	0.971045	0.0289553	0.0579106	0.244192	Up
REACTOME_SIGNALING_BY_WNT	82	0.0219432	0.970869	0.0291308	0.0582617	0.244667	Up
GENTILE_RESPONSE_CLUSTER_D3	56	-0.00974585	0.970759	0.0292414	0.0584829	0.244667	Up
REACTOME_METABOLISM_OF_CARBOHYDRATES	114	0.00923999	0.970277	0.0297231	0.0594462	0.245857	Up
GEORGES_TARGETS_OF_MIR192_AND_MIR215	851	0.00527549	0.969831	0.0301688	0.0603377	0.247805	Up
REACTOME_P75NTR_RECRUITS_SIGNALLING_COMPLEXES	15	-0.0351069	0.969787	0.0302133	0.0604266	0.247805	Up
REACTOME_E2F_ENABLED_INHIBITION_OF_PRE_REPLICATION_COMPLEX_FORMATION	12	0.173339	0.969533	0.0304672	0.0609343	0.248542	Up
CHANDRAN_METASTASIS_UP	97	-0.00581322	0.969476	0.0305243	0.0610486	0.248633	Up
REACTOME_LOSS_OF_NLP_FROM_MITOTIC_CENTROSOMES	79	0.0525828	0.969355	0.0306447	0.0612893	0.248633	Up
GOLUB_ALL_VS_AML_UP	19	-0.036276	0.969082	0.0309179	0.0618359	0.249944	Up
PYEON_CANCER_HEAD_AND_NECK_VS_CERVICAL_UP	171	0.0156304	0.969051	0.030949	0.0618979	0.249944	Up
BOYLAN_MULTIPLE_MYELOMA_C_D_UP	131	0.00970508	0.968713	0.0312872	0.0625743	0.251067	Up
REACTOME_REGULATION_OF_ORNITHINE_DECARBOXYLASE	60	0.0106139	0.968602	0.0313979	0.0627957	0.251106	Up
REACTOME_RESOLUTION_OF_AP_SITES_VIA_THE_SINGLE_NUCLEOTIDE_REPLACEMENT_PATHWAY	16	-0.0268208	0.968007	0.0319927	0.0639853	0.25294	Up
REACTOME_RECRUITMENT_OF_NUMA_TO_MITOTIC_CENTROSOMES	10	0.120067	0.967994	0.0320058	0.0640115	0.25294	Up
REACTOME_VIF_MEDIATED_DEGRADATION_OF_APOBEC3G	64	0.0138913	0.967985	0.0320152	0.0640305	0.25294	Up
BYSTRYKH_HEMATOPOIESIS_STEM_CELL_AND_BRAIN_QTL_TRANS	164	-9.15566e-05	0.967155	0.032845	0.06569	0.256695	Up
SCHLOSSER_MYC_TARGETS_AND_SERUM_RESPONSE_UP	63	0.0223821	0.966747	0.0332527	0.0665055	0.25926	Up
MOOTHA_PGC	438	0.000312053	0.966182	0.0338183	0.0676367	0.262283	Up
BIOCARTA_SPPA_PATHWAY	27	-0.0214776	0.966027	0.0339727	0.0679455	0.262283	Up
KEGG_HOMOLOGOUS_RECOMBINATION	37	0.0708986	0.965952	0.0340482	0.0680964	0.262324	Up
REACTOME_PYRIMIDINE_METABOLISM	31	-0.00692442	0.965767	0.0342333	0.0684666	0.263128	Up
REACTOME_HOMOLOGOUS_RECOMBINATION_REPAIR	22	0.0624486	0.965718	0.0342816	0.0685632	0.263189	Up
LIANG_HEMATOPOIESIS_STEM_CELL_NUMBER_LARGE_VS_TINY_UP	42	-0.0145147	0.965416	0.0345845	0.069169	0.264248	Up
WALLACE_JAK2_TARGETS_UP	27	0.00702289	0.965378	0.0346223	0.0692446	0.264248	Up
WANG_RESPONSE_TO_FORSKOLIN_UP	24	-0.0101412	0.964737	0.0352629	0.0705258	0.266949	Up
KIM_MYC_AMPLIFICATION_TARGETS_UP	153	0.00577337	0.964478	0.0355222	0.0710444	0.267088	Up
WEIGEL_OXIDATIVE_STRESS_BY_HNE_AND_H2O2	42	0.00214905	0.964449	0.035551	0.0711019	0.267088	Up
RAMASWAMY_METASTASIS_UP	81	0.0134254	0.964418	0.0355819	0.0711638	0.267088	Up
WU_APOPTOSIS_BY_CDKN1A_NOT_VIA_TP53	13	-0.00797113	0.964404	0.0355962	0.0711925	0.267088	Up
REACTOME_FANCONI_ANEMIA_PATHWAY	13	-0.0646135	0.964309	0.0356906	0.0713813	0.267088	Up
HOFMANN_MYELODYSPLASTIC_SYNDROM_LOW_RISK_DN	27	-0.010361	0.964309	0.035691	0.071382	0.267088	Up
DAZARD_RESPONSE_TO_UV_NHEK_DN	309	0.00380064	0.964245	0.0357553	0.0715105	0.267262	Up
BIOCARTA_MTA3_PATHWAY	16	-0.0249623	0.96378	0.0362205	0.0724409	0.267974	Up
LIU_VAV3_PROSTATE_CARCINOGENESIS_DN	16	-0.0446662	0.963727	0.0362735	0.072547	0.268062	Up
CAFFAREL_RESPONSE_TO_THC_8HR_5_DN	13	-0.0415897	0.963322	0.0366777	0.0733553	0.26875	Up
BENPORATH_ES_2	33	0.021682	0.962889	0.0371114	0.0742228	0.270876	Up
WEST_ADRENOCORTICAL_CARCINOMA_VS_ADENOMA_UP	20	0.0512423	0.962449	0.037551	0.0751019	0.273472	Up
LIU_BREAST_CANCER	8	0.0330791	0.962343	0.0376568	0.0753136	0.273631	Up
WILCOX_PRESPONSE_TO_ROGESTERONE_UP	152	0.000225915	0.961851	0.038149	0.076298	0.275814	Up
REACTOME_SYNTHESIS_AND_INTERCONVERSION_OF_NUCLEOTIDE_DI_AND_TRIPHOSPHATES	30	0.0979377	0.961794	0.0382061	0.0764122	0.275814	Up
KUROKAWA_LIVER_CANCER_CHEMOTHERAPY_DN	15	0.00473987	0.961562	0.0384377	0.0768755	0.276226	Up
MATSUDA_NATURAL_KILLER_DIFFERENTIATION	477	0.00395078	0.961189	0.0388108	0.0776216	0.2786	Up
REACTOME_RNA_POLYMERASE_II_TRANSCRIPTION	111	0.0191024	0.961015	0.0389847	0.0779693	0.278926	Up
MATHEW_FANCONI_ANEMIA_GENES	10	-0.0442666	0.960863	0.0391369	0.0782738	0.279298	Up
REACTOME_FRS2_MEDIATED_ACTIVATION	27	-0.0217971	0.959963	0.0400369	0.0800739	0.283653	Up
REACTOME_MRNA_DECAY_BY_3_TO_5_EXORIBONUCLEASE	11	0.102021	0.959886	0.0401145	0.080229	0.283894	Up
HAHTOLA_MYCOSIS_FUNGOIDES_CD4_DN	146	0.000303006	0.959824	0.040176	0.0803519	0.284021	Up
BENPORATH_MYC_TARGETS_WITH_EBOX	276	-0.000125753	0.959646	0.0403545	0.080709	0.284974	Up
CHEN_LUNG_CANCER_SURVIVAL	27	-0.0235764	0.959446	0.0405537	0.0811073	0.28607	Up
ACEVEDO_LIVER_TUMOR_VS_NORMAL_ADJACENT_TISSUE_UP	953	0.0025278	0.959363	0.0406371	0.0812741	0.286091	Up
BIOCARTA_EIF2_PATHWAY	16	-0.000422847	0.958999	0.0410009	0.0820017	0.28705	Up
SASAKI_ADULT_T_CELL_LEUKEMIA	144	0.00575781	0.958907	0.0410928	0.0821855	0.287292	Up
HOLLMAN_APOPTOSIS_VIA_CD40_UP	207	-0.00197586	0.958482	0.0415185	0.083037	0.288813	Up
HOEGERKORP_CD44_TARGETS_DIRECT_DN	11	-0.0229587	0.958349	0.0416514	0.0833027	0.289428	Up
ZHAN_MULTIPLE_MYELOMA_SUBGROUPS	32	0.0143615	0.957892	0.0421077	0.0842153	0.290057	Up
TSAI_DNAJB4_TARGETS_DN	11	0.0647993	0.956762	0.0432381	0.0864763	0.295548	Up
BONOME_OVARIAN_CANCER_POOR_SURVIVAL_DN	37	0.0117771	0.956756	0.0432444	0.0864889	0.295548	Up
REACTOME_POST_CHAPERONIN_TUBULIN_FOLDING_PATHWAY	18	0.0475272	0.956248	0.0437519	0.0875037	0.297057	Up
YAMANAKA_GLIOBLASTOMA_SURVIVAL_UP	15	-0.0516184	0.955821	0.0441787	0.0883573	0.298401	Up
KUROKAWA_LIVER_CANCER_EARLY_RECURRENCE_UP	16	0.00258053	0.955676	0.0443241	0.0886482	0.298869	Up
MULLIGHAN_NPM1_MUTATED_SIGNATURE_1_UP	291	-0.00140691	0.955379	0.0446214	0.0892428	0.299837	Up
TIEN_INTESTINE_PROBIOTICS_6HR_UP	69	0.0242174	0.954901	0.0450991	0.0901982	0.301803	Up
CHUANG_OXIDATIVE_STRESS_RESPONSE_DN	7	-0.0104296	0.954563	0.0454368	0.0908735	0.302819	Up
ACEVEDO_LIVER_CANCER_WITH_H3K9ME3_DN	84	0.0118395	0.954458	0.0455419	0.0910839	0.30292	Up
REACTOME_METABOLISM_OF_MRNA	69	0.0220501	0.954209	0.0457907	0.0915814	0.303602	Up
ROYLANCE_BREAST_CANCER_16Q_COPY_NUMBER_UP	27	-0.0168936	0.95376	0.0462397	0.0924795	0.304215	Up
KEGG_GLYOXYLATE_AND_DICARBOXYLATE_METABOLISM	18	-0.0098779	0.9537	0.0462997	0.0925994	0.304215	Up
CHEN_HOXA5_TARGETS_9HR_DN	61	0.00334088	0.953572	0.0464283	0.0928566	0.304753	Up
TIEN_INTESTINE_PROBIOTICS_6HR_DN	198	0.00296104	0.953066	0.0469343	0.0938685	0.305747	Up
ENK_UV_RESPONSE_EPIDERMIS_UP	347	-0.000785104	0.952973	0.0470269	0.0940539	0.305747	Up
BIOCARTA_PYK2_PATHWAY	41	-0.00243367	0.95285	0.04715	0.0943	0.305747	Up
KORKOLA_SEMINOMA_UP	41	-0.00250994	0.952835	0.0471652	0.0943303	0.305747	Up
ZEMBUTSU_SENSITIVITY_TO_METHOTREXATE	2	0.430618	0.95279	0.0472102	0.0944204	0.305747	Up
WILLIAMS_ESR1_TARGETS_UP	24	0.0148642	0.952718	0.0472817	0.0945634	0.305747	Up
BUYTAERT_PHOTODYNAMIC_THERAPY_STRESS_DN	731	0.00279784	0.952607	0.047393	0.094786	0.305747	Up
REACTOME_TELOMERE_MAINTENANCE	81	0.0158592	0.952563	0.0474374	0.0948749	0.305747	Up
BIOCARTA_G1_PATHWAY	42	-0.0142057	0.952449	0.0475513	0.0951027	0.305962	Up
GENTILE_UV_RESPONSE_CLUSTER_D5	38	0.011012	0.951917	0.0480829	0.0961658	0.308042	Up
HATADA_METHYLATED_IN_LUNG_CANCER_DN	12	0.0049013	0.951628	0.0483718	0.0967436	0.308774	Up
REACTOME_DOUBLE_STRAND_BREAK_REPAIR	28	0.0652919	0.9515	0.0485005	0.097001	0.308774	Up
FLECHNER_PBL_KIDNEY_TRANSPLANT_REJECTED_VS_OK_DN	63	-0.000117985	0.951483	0.0485172	0.0970344	0.308774	Up
SMITH_TERT_TARGETS_UP	164	0.00344499	0.951149	0.0488507	0.0977014	0.308835	Up
BENPORATH_ES_CORE_NINE (breast cancer)	14	0.122698	0.951013	0.0489866	0.0979731	0.309001	Up
HONMA_DOCETAXEL_RESISTANCE	30	-0.0178549	0.950461	0.0495395	0.0990789	0.309372	Up
REACTOME_SIGNALLING_TO_P38_VIA_RIT_AND_RIN	23	-0.00076332	0.950358	0.0496422	0.0992844	0.309372	Up
BROWNE_HCMV_INFECTION_48HR_UP	151	-0.000380674	0.950337	0.0496626	0.0993252	0.309372	Up
JEON_SMAD6_TARGETS_DN	12	-0.0742897	0.950336	0.0496641	0.0993281	0.309372	Up
KUNINGER_IGF1_VS_PDGFB_TARGETS_DN	24	-0.0152646	0.950147	0.0498531	0.0997062	0.309508	Up
HWANG_PROSTATE_CANCER_MARKERS	23	-0.0023829	0.95008	0.0499202	0.0998404	0.309591	Up
RUIZ_TNC_TARGETS_UP	166	-0.00250911	0.000205643	0.999794	0.000411286	0.0461233	Down
SANA_RESPONSE_TO_IFNG_UP	49	-0.0131833	0.000314252	0.999686	0.000628504	0.0507739	Down
BOWIE_RESPONSE_TO_TAMOXIFEN	17	0.00526196	0.000421789	0.999578	0.000843578	0.0514187	Down
SANA_TNF_SIGNALING_UP	67	0.00331593	0.000448276	0.999552	0.000896551	0.0514187	Down
JISON_SICKLE_CELL_DISEASE_UP	197	-0.00237016	0.000522953	0.999477	0.00104591	0.0568102	Down
DER_IFN_ALPHA_RESPONSE_UP	76	-0.0030847	0.000554137	0.999446	0.00110827	0.0577732	Down
FULCHER_INFLAMMATORY_RESPONSE_LECTIN_VS_LPS_DN	350	0.000597041	0.000593012	0.999407	0.00118602	0.0581197	Down
BROWNE_INTERFERON_RESPONSIVE_GENES	68	0.00693362	0.000602822	0.999397	0.00120564	0.0581197	Down
KINSEY_TARGETS_OF_EWSR1_FLII_FUSION_DN	356	0.00379192	0.000680207	0.99932	0.00136041	0.0624449	Down
WALLACE_PROSTATE_CANCER_RACE_UP	152	-0.00285664	0.000794613	0.999205	0.00158923	0.0647411	Down
ZHANG_RESPONSE_TO_IKK_INHIBITOR_AND_TNF_UP	186	0.000710915	0.000813205	0.999187	0.00162641	0.0654379	Down
ZHOU_INFLAMMATORY_RESPONSE_LPS_UP	236	0.000248811	0.000835469	0.999165	0.00167094	0.0657667	Down
GOZGIT_ESR1_TARGETS_DN	564	0.000611996	0.000837471	0.999163	0.00167494	0.0657667	Down
DELYS_THYROID_CANCER_DN	190	0.00287778	0.000870836	0.999129	0.00174167	0.0667778	Down
LIU_VAV3_PROSTATE_CARCINOGENESIS_UP	75	-0.00414247	0.000909818	0.99909	0.00181964	0.0687246	Down
RODRIGUES_THYROID_CARCINOMA_POORLY_DIFFERENTIATED_DN	774	-0.000214491	0.000959702	0.99904	0.0019194	0.0687246	Down
BROWNE_HCMV_INFECTION_2HR_UP	30	-0.0288054	0.000963685	0.999036	0.00192737	0.0687246	Down
UROSEVIC_RESPONSE_TO_IMIQUIMOD	14	-0.0515286	0.000985743	0.999014	0.00197149	0.0690868	Down
TAKEDA_TARGETS_OF_NUP98_HOXA9_FUSION_3D_UP	135	0.0104194	0.00105795	0.998942	0.0021159	0.0725864	Down
CAIRO_HEPATOBLASTOMA_CLASSES_DN	204	0.00294875	0.00109067	0.998909	0.00218134	0.0731804	Down
BERENJENO_TRANSFORMED_BY_RHOA_DN	522	0.0113432	0.00110361	0.998896	0.00220723	0.0731804	Down
GRANDVAUX_IFN_RESPONSE_NOT_VIA_IRF3	16	0.0179523	0.00114412	0.998856	0.00228824	0.0733554	Down
HORIUCHI_WTAP_TARGETS_UP	244	0.00105572	0.00114794	0.998852	0.00229587	0.0733554	Down
MOSERLE_IFNA_RESPONSE	24	0.0716491	0.00117459	0.998825	0.00234918	0.0734016	Down
VECCHI_GASTRIC_CANCER_EARLY_DN	191	0.00208274	0.00120398	0.998796	0.00240796	0.0734016	Down
SABATES_COLORECTAL_ADENOMA_DN	134	0.00611664	0.00121961	0.99878	0.00243923	0.0734016	Down
SEITZ_NEOPLASTIC_TRANSFORMATION_BY_8P_DELETION_UP	56	-0.0054853	0.00123797	0.998762	0.00247594	0.0734016	Down
KOBAYASHI_EGFR_SIGNALING_24HR_UP	89	-0.000730269	0.00124785	0.998752	0.0024957	0.0734016	Down
TONKS_TARGETS_OF_RUNX1_RUNX1T1_FUSION_ERYTHROCYTE_UP	163	-0.00172321	0.00126127	0.998739	0.00252255	0.0734016	Down
EINAV_INTERFERON_SIGNATURE_IN_CANCER	31	0.0211428	0.00128903	0.998711	0.00257807	0.0737011	Down
NAKAYAMA_SOFT_TISSUE_TUMORS_PCA1_UP	45	-0.00750474	0.00138637	0.998614	0.00277274	0.0762692	Down
WU_SILENCED_BY_METHYLATION_IN_BLADDER_CANCER	33	-0.0160534	0.00142756	0.998572	0.00285512	0.0762692	Down
BENNETT_SYSTEMIC_LUPUS_ERYTHEMATOSUS	19	0.0540963	0.00149909	0.998501	0.00299818	0.0769201	Down
GAURNIER_PSMD4_TARGETS	24	-0.0151684	0.00152799	0.998472	0.00305597	0.0772048	Down
MARKEY_RB1_ACUTE_LOF_UP	226	0.00350535	0.00154938	0.998451	0.00309877	0.0776838	Down
BROWNE_HCMV_INFECTION_18HR_DN	183	-0.00128223	0.00159735	0.998403	0.0031947	0.0780596	Down
BROWNE_HCMV_INFECTION_30MIN_UP	39	-0.000730376	0.00160478	0.998395	0.00320957	0.0780596	Down
TARTE_PLASMA_CELL_VS_PLASMABLAST_UP	298	0.00219663	0.00187468	0.998125	0.00374935	0.0866606	Down
ZHU_CMV_8_HR_UP	30	-0.000827939	0.00190139	0.998099	0.00380278	0.0871941	Down
TSAI_DNAJB4_TARGETS_UP	17	0.0370751	0.00194573	0.998054	0.00389147	0.0871941	Down
MISSIAGLIA_REGULATED_BY_METHYLATION_UP	101	0.00220399	0.00196994	0.99803	0.00393988	0.0873474	Down
BOWIE_RESPONSE_TO_EXTRACELLULAR_MATRIX	11	0.131148	0.00204879	0.997951	0.00409759	0.0879275	Down
LEE_LIVER_CANCER_E2F1_UP	60	-0.00731427	0.00208343	0.997917	0.00416686	0.0879275	Down
WEST_ADRENOCORTICAL_TUMOR_DN	534	0.00506626	0.0021482	0.997852	0.0042964	0.0879275	Down
VERHAAK_AML_WITH_NPM1_MUTATED_DN	204	0.000317452	0.00225687	0.997743	0.00451373	0.0879275	Down
ZHANG_INTERFERON_RESPONSE	27	0.0505561	0.00228174	0.997718	0.00456349	0.0879275	Down
RODRIGUES_THYROID_CARCINOMA_ANAPLASTIC_DN	521	0.000412605	0.00228978	0.99771	0.00457957	0.0879275	Down
DER_IFN_GAMMA_RESPONSE_UP	81	-0.000308114	0.00229329	0.997707	0.00458658	0.0879275	Down
UDAYAKUMAR_MED1_TARGETS_DN	288	-0.000626748	0.00236246	0.997638	0.00472492	0.0888198	Down
LIANG_SILENCED_BY_METHYLATION_2	32	0.0510413	0.00256941	0.997431	0.00513881	0.092527	Down
DODD_NASOPHARYNGEAL_CARCINOMA_UP	1022	0.000718404	0.0026534	0.997347	0.00530679	0.0940965	Down
RADAEVA_RESPONSE_TO_IFNA1_UP	42	0.0107523	0.0026563	0.997344	0.0053126	0.0940965	Down
LEE_LIVER_CANCER_MYC_DN	44	0.0114717	0.00274527	0.997255	0.00549055	0.0957418	Down
LEE_LIVER_CANCER_SURVIVAL_UP	82	-0.00389683	0.0029118	0.997088	0.00582359	0.0994976	Down
YAMASHITA_METHYLATED_IN_PROSTATE_CANCER	45	-0.00825056	0.00292342	0.997077	0.00584684	0.0994976	Down
MARKEY_RB1_CHRONIC_LOF_DN	117	0.000490127	0.00304609	0.996954	0.00609218	0.101161	Down
BIOCARTA_ACE2_PATHWAY	8	0.013917	0.00307621	0.996924	0.00615242	0.101266	Down
PEREZ_TP53_AND_TP63_TARGETS	149	-0.0012857	0.00324066	0.996759	0.00648131	0.102965	Down
TSENG_ADIPOGENIC_POTENTIAL_DN	50	-0.00234649	0.00333826	0.996662	0.00667653	0.10397	Down
DANG_REGULATED_BY_MYC_DN	310	0.00181937	0.00339417	0.996606	0.00678835	0.10397	Down
REACTOME_GPCR_LIGAND_BINDING	129	-0.00228038	0.00339762	0.996602	0.00679524	0.10397	Down
SCHUETZ_BREAST_CANCER_DUCTAL_INVASIVE_UP	348	0.0109996	0.00349168	0.996508	0.00698337	0.105855	Down
JIANG_HYPOXIA_NORMAL	264	-0.00050315	0.00351156	0.996488	0.00702311	0.105964	Down
FARMER_BREAST_CANCER_CLUSTER_1	12	0.0159733	0.00358573	0.996414	0.00717146	0.107384	Down
RADMACHER_AML_PROGNOSIS	72	-0.00363156	0.0035995	0.9964	0.007199	0.107384	Down
DASU_IL6_SIGNALING_UP	66	0.010927	0.00361203	0.996388	0.00722405	0.107384	Down
TSENG_IRS1_TARGETS_DN	144	0.00217509	0.00362448	0.996376	0.00724897	0.107384	Down
LIU_PROSTATE_CANCER_DN	430	0.00155009	0.00386224	0.996138	0.00772447	0.112384	Down
TSAI_RESPONSE_TO_IONIZING_RADIATION	119	-0.000156757	0.00395943	0.996041	0.00791885	0.113519	Down
LEE_LIVER_CANCER_MYC_TGFA_UP	65	-0.00904093	0.00414744	0.995853	0.00829487	0.114993	Down
NIELSEN_MALIGNAT_FIBROUS_HISTIOCYTOMA_UP	11	-0.0339019	0.00418779	0.995812	0.00837558	0.114993	Down
MITSIADES_RESPONSE_TO_APLIDIN_UP	434	-0.00115018	0.00420839	0.995792	0.00841678	0.114993	Down
ROY_WOUND_BLOOD_VESSEL_UP	62	-0.00289786	0.00423479	0.995765	0.00846957	0.114993	Down
COULOUARN_TEMPORAL_TGFB1_SIGNATURE_DN	127	-0.00646906	0.00427853	0.995721	0.00855707	0.114993	Down
BENPORATH_SUZ12_TARGETS	524	0.00267603	0.00434671	0.995653	0.00869342	0.11564	Down
KRASNOSELSKAYA_ILF3_TARGETS_UP	21	0.111055	0.00439005	0.99561	0.00878011	0.116319	Down
NUYTTEN_EZH2_TARGETS_UP	989	0.00367015	0.00442889	0.995571	0.00885779	0.116873	Down
GRUETZMANN_PANCREATIC_CANCER_DN	207	0.000429007	0.0044733	0.995527	0.0089466	0.117568	Down
CASTELLANO_NRAS_TARGETS_UP	61	0.00126438	0.00457949	0.995421	0.00915898	0.11829	Down
SEKI_INFLAMMATORY_RESPONSE_LPS_DN	18	0.0434808	0.00458291	0.995417	0.00916582	0.11829	Down
SMID_BREAST_CANCER_BASAL_DN	507	0.00458348	0.00465214	0.995348	0.00930429	0.118912	Down
DAVICIONI_MOLECULAR_ARMS_VS_ERMS_DN	198	0.0113548	0.00470402	0.995296	0.00940804	0.119157	Down
BENPORATH_PRC2_TARGETS	274	0.0023908	0.00473934	0.995261	0.00947869	0.119157	Down
CHANDRAN_METASTASIS_DN	75	0.00910109	0.00474005	0.99526	0.0094801	0.119157	Down
LIEN_BREAST_CARCINOMA_METAPLASTIC	46	-0.0187452	0.00480309	0.995197	0.00960618	0.119157	Down
FLECHNER_BIOPSY_KIDNEY_TRANSPLANT_REJECTED_VS_OK_UP	66	0.00495371	0.0048314	0.995169	0.0096628	0.119157	Down
WANG_SMARCE1_TARGETS_UP	182	0.0152803	0.00483474	0.995165	0.00966947	0.119157	Down
KAYO_CALORIE_RESTRICTION_MUSCLE_UP	84	-0.00622552	0.00484452	0.995155	0.00968904	0.119157	Down
CHIANG_LIVER_CANCER_SUBCLASS_CTNNB1_DN	111	0.00753771	0.00487447	0.995126	0.00974894	0.119443	Down
SMID_BREAST_CANCER_NORMAL_LIKE_UP	242	0.0118307	0.00491113	0.995089	0.00982225	0.119731	Down
BENPORATH_ES_WITH_H3K27ME3	519	0.00256196	0.00494136	0.995059	0.00988271	0.119731	Down
WONG_ENDMETRIUM_CANCER_DN	43	0.0133445	0.00498737	0.995013	0.00997475	0.120399	Down
HESS_TARGETS_OF_HOXA9_AND_MEIS1_DN	66	0.0339788	0.00508662	0.994913	0.0101732	0.121811	Down
REACTOME_CLASS_A1_RHODOPSIN_LIKE_RECEPTORS	77	-0.00967885	0.00510194	0.994898	0.0102039	0.121811	Down
CREIGHTON_ENDOCRINE_THERAPY_RESISTANCE_5	438	0.000319564	0.0051301	0.99487	0.0102602	0.121823	Down
HAHTOLA_MYCOSIS_FUNGOIDES_CD4_UP	56	0.00360902	0.00520626	0.994794	0.0104125	0.121823	Down
ISHIKAWA_STING_SIGNALING	10	0.0386868	0.00521408	0.994786	0.0104282	0.121823	Down
BIDUS_METASTASIS_DN	158	0.00284612	0.00521457	0.994785	0.0104291	0.121823	Down
GAUSSMANN_MLL_AF4_FUSION_TARGETS_E_UP	80	0.0143949	0.00533908	0.994661	0.0106782	0.123844	Down
ACEVEDO_LIVER_CANCER_DN	496	0.000338761	0.00536744	0.994633	0.0107349	0.124045	Down
ZHU_CMV_8_HR_DN	40	0.00104393	0.00538582	0.994614	0.0107716	0.124045	Down
CHANG_IMMORTALIZED_BY_HPV31_DN	23	-0.018539	0.00543992	0.99456	0.0108798	0.124742	Down
LEE_LIVER_CANCER_MYC_E2F1_UP	46	-0.00926106	0.00545469	0.994545	0.0109094	0.124742	Down
SCHLESINGER_METHYLATED_DE_NOVO_IN_CANCER	74	-0.000460794	0.00547347	0.994527	0.0109469	0.124742	Down
SATO_SILENCED_BY_METHYLATION_IN_PANCREATIC_CANCER_1	296	0.00655478	0.00550904	0.994491	0.0110181	0.125001	Down
CROMER_TUMORIGENESIS_UP	65	0.00859744	0.00552378	0.994476	0.0110476	0.125001	Down
BROWNE_HCMV_INFECTION_24HR_DN	172	0.000664802	0.00554241	0.994458	0.0110848	0.125001	Down
BERTUCCI_INVASIVE_CARCINOMA_DUCTAL_VS_LOBULAR_DN	38	0.0379202	0.00560455	0.994395	0.0112091	0.125534	Down
KEGG_NEUROACTIVE_LIGAND_RECEPTOR_INTERACTION	74	-0.00878517	0.0056446	0.994355	0.0112892	0.125998	Down
MONNIER_POSTRADIATION_TUMOR_ESCAPE_DN	366	-0.00207223	0.00571096	0.994289	0.0114219	0.126564	Down
HELLER_SILENCED_BY_METHYLATION_UP	183	0.000132737	0.00576614	0.994234	0.0115323	0.126908	Down
HOSHIDA_LIVER_CANCER_SUBCLASS_S3	238	0.0115876	0.00586591	0.994134	0.0117318	0.126908	Down
FERREIRA_EWINGS_SARCOMA_UNSTABLE_VS_STABLE_DN	96	0.0102126	0.00588772	0.994112	0.0117754	0.126908	Down
HOFMANN_CELL_LYMPHOMA_DN	30	-0.0230501	0.00592624	0.994074	0.0118525	0.126908	Down
HUTTMANN_B_CLL_POOR_SURVIVAL_UP	234	0.000167229	0.00593409	0.994066	0.0118682	0.126908	Down
GOUYER_TATI_TARGETS_UP	8	-0.0984162	0.00603322	0.993967	0.0120664	0.127916	Down
KEGG_PRIMARY_BILE_ACID_BIOSYNTHESIS	13	-0.0367597	0.00604452	0.993955	0.012089	0.127916	Down
TAKEDA_TARGETS_OF_NUP98_HOXA9_FUSION_16D_DN	89	-0.00583345	0.00608497	0.993915	0.0121699	0.128356	Down
VERRECCHIA_RESPONSE_TO_TGFB1_C3	20	-0.00888024	0.00618568	0.993814	0.0123714	0.129961	Down
DING_LUNG_CANCER_BY_MUTATION_RATE	15	-0.00841655	0.00625284	0.993747	0.0125057	0.129961	Down
BERENJENO_TRANSFORMED_BY_RHOA_FOREVER_UP	30	-0.00174901	0.00627645	0.993724	0.0125529	0.129961	Down
VALK_AML_CLUSTER_13	31	0.0305601	0.00627673	0.993723	0.0125535	0.129961	Down
REACTOME_ETHANOL_OXIDATION	4	-0.0748025	0.0063538	0.993646	0.0127076	0.130515	Down
REACTOME_SYNTHESIS_OF_BILE_ACIDS_AND_BILE_SALTS	16	-0.0423121	0.006459	0.993541	0.012918	0.131132	Down
CHARAFE_BREAST_CANCER_LUMINAL_VS_BASAL_DN	476	0.000793482	0.00646234	0.993538	0.0129247	0.131132	Down
ICHIBA_GRAFT_VERSUS_HOST_DISEASE_D7_UP	87	0.0284094	0.00647814	0.993522	0.0129563	0.131132	Down
GARY_CD5_TARGETS_UP	540	-9.11333e-05	0.0065656	0.993434	0.0131312	0.132082	Down
KEGG_RENIN_ANGIOTENSIN_SYSTEM	15	0.0586689	0.0066049	0.993395	0.0132098	0.132464	Down
SMID_BREAST_CANCER_LUMINAL_B_DN	383	0.00327127	0.00664874	0.993351	0.0132975	0.132934	Down
GERY_CEBP_TARGETS	135	0.00479367	0.00667671	0.993323	0.0133534	0.133085	Down
REACTOME_METABOLISM_OF_BILE_ACIDS_AND_BILE_SALTS	17	-0.0389025	0.00683585	0.993164	0.0136717	0.134795	Down
ZHAN_MULTIPLE_MYELOMA_LB_DN	49	-0.00472285	0.00686688	0.993133	0.0137338	0.134795	Down
FARMER_BREAST_CANCER_CLUSTER_5	26	0.0537928	0.00687921	0.993121	0.0137584	0.134795	Down
WEINMANN_ADAPTATION_TO_HYPOXIA_DN	34	0.00621044	0.00694368	0.993056	0.0138874	0.135157	Down
YAO_TEMPORAL_RESPONSE_TO_PROGESTERONE_CLUSTER_1	78	0.00301175	0.00694656	0.993053	0.0138931	0.135157	Down
BORCZUK_MALIGNANT_MESOTHELIOMA_DN	70	-0.00732816	0.0070422	0.992958	0.0140844	0.135435	Down
PEREZ_TP63_TARGETS	249	0.00280225	0.00704393	0.992956	0.0140879	0.135435	Down
SWEET_LUNG_CANCER_KRAS_DN	390	0.00949708	0.00709853	0.992901	0.0141971	0.136083	Down
TURASHVILI_BREAST_LOBULAR_CARCINOMA_VS_LOBULAR_NORMAL_DN	65	0.00223581	0.00715428	0.992846	0.0143086	0.13675	Down
CHARAFE_BREAST_CANCER_LUMINAL_VS_MESENCHYMAL_UP	336	-0.00052371	0.00720952	0.99279	0.014419	0.137125	Down
LEE_LIVER_CANCER_CIPROFIBRATE_UP	52	0.000512882	0.00724402	0.992756	0.014488	0.137125	Down
IYENGAR_RESPONSE_TO_ADIPOCYTE_FACTORS	12	-0.0728806	0.00724878	0.992751	0.0144976	0.137125	Down
LINDGREN_BLADDER_CANCER_CLUSTER_2B	365	0.00979252	0.00728495	0.992715	0.0145699	0.137125	Down
ZHU_CMV_ALL_DN	88	0.00660667	0.00728983	0.99271	0.0145797	0.137125	Down
WHITESIDE_CISPLATIN_RESISTANCE_UP	15	-0.0253188	0.00730016	0.9927	0.0146003	0.137125	Down
DIRMEIER_LMP1_RESPONSE_EARLY	58	-0.00467182	0.00744486	0.992555	0.0148897	0.139151	Down
VALK_AML_WITH_FLT3_ITD	36	-0.000772072	0.00747374	0.992526	0.0149475	0.139151	Down
LEE_NEURAL_CREST_STEM_CELL_UP	120	-0.00316835	0.00747977	0.99252	0.0149595	0.139151	Down
PEREZ_TP53_TARGETS	839	0.00371299	0.00749342	0.992507	0.0149868	0.139151	Down
ROZANOV_MMP14_TARGETS_UP	249	0.00447224	0.00756648	0.992434	0.015133	0.13986	Down
CORRE_MULTIPLE_MYELOMA_DN	54	0.0151099	0.00759369	0.992406	0.0151874	0.13986	Down
GAUSSMANN_MLL_AF4_FUSION_TARGETS_F_DN	28	-0.0149361	0.00776574	0.992234	0.0155315	0.140738	Down
FURUKAWA_DUSP6_TARGETS_PCI35_UP	34	0.000352912	0.00779328	0.992207	0.0155866	0.140738	Down
REACTOME_G_ALPHA_I_SIGNALLING_EVENTS	62	-0.0132357	0.00780653	0.992193	0.0156131	0.140738	Down
CHIBA_RESPONSE_TO_TSA_UP	39	-0.0164406	0.00780807	0.992192	0.0156161	0.140738	Down
MARZEC_IL2_SIGNALING_DN	42	0.00713972	0.00781637	0.992184	0.0156327	0.140738	Down
FARMER_BREAST_CANCER_CLUSTER_4	21	0.0104696	0.00790838	0.992092	0.0158168	0.1413	Down
HINATA_NFKB_TARGETS_KERATINOCYTE_UP	79	0.0107756	0.00791265	0.992087	0.0158253	0.1413	Down
NAKAYAMA_SOFT_TISSUE_TUMORS_PCA2_DN	41	0.0605646	0.00795718	0.992043	0.0159144	0.141707	Down
SMIRNOV_CIRCULATING_ENDOTHELIOCYTES_IN_CANCER_UP	141	-0.001864	0.00802945	0.991971	0.0160589	0.141987	Down
YAO_TEMPORAL_RESPONSE_TO_PROGESTERONE_CLUSTER_0	68	0.0106453	0.00820455	0.991795	0.0164091	0.141987	Down
LEE_LIVER_CANCER_ACOX1_UP	56	-0.000362141	0.00823993	0.99176	0.0164799	0.141987	Down
VART_KSHV_INFECTION_ANGIOGENIC_MARKERS_UP	128	0.0120323	0.00826349	0.991737	0.016527	0.141987	Down
ONDER_CDH1_TARGETS_2_UP	291	0.00921263	0.00833594	0.991664	0.0166719	0.141987	Down
ODONNELL_TARGETS_OF_MYC_AND_TFRC_UP	61	0.00995569	0.00834472	0.991655	0.0166894	0.141987	Down
RUTELLA_RESPONSE_TO_HGF_UP	412	0.00141663	0.00839694	0.991603	0.0167939	0.141987	Down
ZHU_CMV_ALL_UP	56	-3.35617e-05	0.00842625	0.991574	0.0168525	0.141987	Down
LANDIS_ERBB2_BREAST_PRENEOPLASTIC_DN	63	-0.00205883	0.00842822	0.991572	0.0168564	0.141987	Down
BIOCARTA_IL10_PATHWAY	16	-0.0354593	0.00844867	0.991551	0.0168973	0.141987	Down
GAUSSMANN_MLL_AF4_FUSION_TARGETS_F_UP	148	0.0342831	0.00849258	0.991507	0.0169852	0.141987	Down
IIZUKA_LIVER_CANCER_PROGRESSION_G1_G2_UP	12	-0.0555631	0.00861611	0.991384	0.0172322	0.141987	Down
WANG_CISPLATIN_RESPONSE_AND_XPC_DN	162	-0.0015906	0.00865334	0.991347	0.0173067	0.141987	Down
ZHANG_ANTIVIRAL_RESPONSE_TO_RIBAVIRIN_UP	23	0.0270847	0.00866628	0.991334	0.0173326	0.141987	Down
ZHAN_V1_LATE_DIFFERENTIATION_GENES_UP	34	-0.00859374	0.0086704	0.99133	0.0173408	0.141987	Down
FARMER_BREAST_CANCER_CLUSTER_3	19	0.0128262	0.00873538	0.991265	0.0174708	0.141987	Down
BIOCARTA_LONGEVITY_PATHWAY	20	-0.0216609	0.00877081	0.991229	0.0175416	0.141987	Down
GARCIA_TARGETS_OF_FLI1_AND_DAX1_UP	47	0.00624071	0.00877888	0.991221	0.0175578	0.141987	Down
LINDSTEDT_DENDRITIC_CELL_MATURATION_D	52	-0.00200152	0.00887424	0.991126	0.0177485	0.143174	Down
BARRIER_COLON_CANCER_RECURRENCE_DN	34	0.000575018	0.00893988	0.99106	0.0178798	0.143522	Down
LANDIS_BREAST_CANCER_PROGRESSION_DN	79	0.0156841	0.00898911	0.991011	0.0179782	0.143958	Down
NAKAYAMA_SOFT_TISSUE_TUMORS_PCA1_DN	59	0.000528946	0.00920763	0.990792	0.0184153	0.146379	Down
ZIRN_TRETINOIN_RESPONSE_WT1_UP	18	-0.0315839	0.00926606	0.990734	0.0185321	0.146711	Down
DAUER_STAT3_TARGETS_DN	28	0.0860154	0.0093708	0.990629	0.0187416	0.147891	Down
KEGG_LYSOSOME	153	0.0308538	0.00957533	0.990425	0.0191507	0.149669	Down
REACTOME_SYNTHESIS_OF_BILE_ACIDS_AND_BILE_SALTS_VIA_7ALPHA_HYDROXYCHOLESTEROL	13	0.0165698	0.00962767	0.990372	0.0192553	0.150127	Down
BOYLAN_MULTIPLE_MYELOMA_C_D_DN	182	0.00188554	0.00978405	0.990216	0.0195681	0.151839	Down
CHEMNITZ_RESPONSE_TO_PROSTAGLANDIN_E2_DN	308	-0.00104922	0.00986703	0.990133	0.0197341	0.152465	Down
WOO_LIVER_CANCER_RECURRENCE_DN	66	-0.0132291	0.00989004	0.99011	0.0197801	0.152465	Down
PICCALUGA_ANGIOIMMUNOBLASTIC_LYMPHOMA_UP	230	0.0230696	0.00994135	0.990059	0.0198827	0.152465	Down
TAKEDA_TARGETS_OF_NUP98_HOXA9_FUSION_8D_DN	103	0.00616464	0.010047	0.989953	0.020094	0.153253	Down
BOYAULT_LIVER_CANCER_SUBCLASS_G5_DN	23	-0.00762556	0.0100525	0.989947	0.0201051	0.153253	Down
RIGGINS_TAMOXIFEN_RESISTANCE_DN	207	0.00130113	0.0100633	0.989937	0.0201265	0.153253	Down
RUTELLA_RESPONSE_TO_HGF_VS_CSF2RB_AND_IL4_UP	370	0.00461738	0.0101374	0.989863	0.0202747	0.153493	Down
SENESE_HDAC1_TARGETS_DN	239	-0.000241108	0.0101651	0.989835	0.0203302	0.153493	Down
LEE_LIVER_CANCER_MYC_TGFA_DN	47	0.0137694	0.0101869	0.989813	0.0203738	0.153493	Down
MAHADEVAN_RESPONSE_TO_MP470_DN	21	-0.000326518	0.0101967	0.989803	0.0203935	0.153493	Down
TAKEDA_TARGETS_OF_NUP98_HOXA9_FUSION_10D_UP	130	0.0107602	0.0103023	0.989698	0.0206045	0.15381	Down
PARENT_MTOR_SIGNALING_UP	694	-0.000214753	0.0103054	0.989695	0.0206107	0.15381	Down
MARTINEZ_RESPONSE_TO_TRABECTEDIN_UP	64	0.0125425	0.0103761	0.989624	0.0207522	0.15381	Down
HUANG_FOXA2_TARGETS_DN	45	-0.00350818	0.010393	0.989607	0.020786	0.15381	Down
BARRIER_CANCER_RELAPSE_NORMAL_SAMPLE_UP	21	-0.0174594	0.0104193	0.989581	0.0208386	0.15381	Down
KANG_IMMORTALIZED_BY_TERT_DN	76	0.0165446	0.0104315	0.989568	0.020863	0.15381	Down
POOLA_INVASIVE_BREAST_CANCER_DN	112	0.00803007	0.0104318	0.989568	0.0208635	0.15381	Down
RODWELL_AGING_KIDNEY_UP	318	0.00717559	0.0105494	0.989451	0.0210988	0.154519	Down
KEGG_CALCIUM_SIGNALING_PATHWAY	116	-0.00646453	0.0109989	0.989001	0.0219978	0.160015	Down
TAKADA_GASTRIC_CANCER_COPY_NUMBER_DN	20	0.00163472	0.0110266	0.988973	0.0220533	0.160015	Down
REACTOME_DOWNSTREAM_EVENTS_IN_GPCR_SIGNALING	213	0.00111577	0.0110485	0.988951	0.0220971	0.160015	Down
ST_G_ALPHA_I_PATHWAY	38	-0.000597584	0.0110611	0.988939	0.0221223	0.160015	Down
LEE_LIVER_CANCER_E2F1_DN	47	0.00538734	0.0111367	0.988863	0.0222735	0.160423	Down
BIOCARTA_HDAC_PATHWAY	37	-0.021908	0.0111494	0.988851	0.0222988	0.160423	Down
WOOD_EBV_EBNA1_TARGETS_DN	47	-0.00193171	0.0111941	0.988806	0.0223881	0.160711	Down
ROETH_TERT_TARGETS_UP	3	0.625396	0.0112496	0.98875	0.0224993	0.161154	Down
FOSTER_INFLAMMATORY_RESPONSE_LPS_DN	412	0.00179904	0.0113493	0.988651	0.0226986	0.162136	Down
TAKEDA_TARGETS_OF_NUP98_HOXA9_FUSION_8D_UP	105	0.0176109	0.011368	0.988632	0.0227359	0.162136	Down
KEGG_COMPLEMENT_AND_COAGULATION_CASCADES	24	0.0432643	0.0114187	0.988581	0.0228375	0.162505	Down
ROSS_AML_WITH_MLL_FUSIONS	88	0.00165092	0.0116974	0.988303	0.0233948	0.16463	Down
PATTERSON_DOCETAXEL_RESISTANCE	7	-0.126876	0.0117186	0.988281	0.0234371	0.16463	Down
BROWNE_HCMV_INFECTION_16HR_DN	97	-0.00423769	0.0117538	0.988246	0.0235077	0.16463	Down
REACTOME_REGULATION_OF_INSULIN_LIKE_GROWTH_FACTOR_ACTIVITY_BY_INSULIN_LIKE_GROWTH_FACTOR_BINDING_PROTEINS	20	0.176387	0.0117773	0.988223	0.0235545	0.16463	Down
LEE_LIVER_CANCER_MYC_E2F1_DN	50	0.0417712	0.0117821	0.988218	0.0235641	0.16463	Down
GAJATE_RESPONSE_TO_TRABECTEDIN_UP	55	0.00197433	0.0118459	0.988154	0.0236917	0.16463	Down
RICKMAN_TUMOR_DIFFERENTIATED_WELL_VS_MODERATELY_UP	107	0.00496229	0.0118753	0.988125	0.0237506	0.164688	Down
HOOI_ST7_TARGETS_DN	95	-0.00628481	0.0120207	0.987979	0.0240414	0.165997	Down
MCCOLLUM_GELDANAMYCIN_RESISTANCE_UP	10	0.0807028	0.0121716	0.987828	0.0243432	0.1673	Down
CHEN_LVAD_SUPPORT_OF_FAILING_HEART_DN	34	0.00695321	0.0122267	0.987773	0.0244534	0.1673	Down
VECCHI_GASTRIC_CANCER_ADVANCED_VS_EARLY_UP	173	0.00876968	0.012488	0.987512	0.0249761	0.168717	Down
SHEDDEN_LUNG_CANCER_GOOD_SURVIVAL_A4	169	-0.00252155	0.0125445	0.987456	0.0250889	0.168717	Down
KEGG_PANCREATIC_CANCER	97	-0.00434304	0.0125514	0.987449	0.0251029	0.168717	Down
ALONSO_METASTASIS_NEURAL_UP	16	-0.00174248	0.0125541	0.987446	0.0251083	0.168717	Down
HOLLMAN_APOPTOSIS_VIA_CD40_DN	282	0.00191102	0.0125822	0.987418	0.0251643	0.168746	Down
YAO_HOXA10_TARGETS_VIA_PROGESTERONE_UP	82	0.029622	0.0126874	0.987313	0.0253748	0.169808	Down
ZHOU_INFLAMMATORY_RESPONSE_FIMA_UP	326	0.00344543	0.0128502	0.98715	0.0257005	0.170744	Down
CHIARADONNA_NEOPLASTIC_TRANSFORMATION_CDC25_DN	223	0.00241227	0.0128534	0.987147	0.0257067	0.170744	Down
TONKS_TARGETS_OF_RUNX1_RUNX1T1_FUSION_HSC_UP	194	0.0174641	0.0129019	0.987098	0.0258037	0.170923	Down
SHI_SPARC_TARGETS_UP	26	-0.0111244	0.0129323	0.987068	0.0258645	0.170979	Down
LANDIS_ERBB2_BREAST_TUMORS_324_DN	164	0.016267	0.0131385	0.986862	0.026277	0.172336	Down
GOLDRATH_IMMUNE_MEMORY	64	-0.00730289	0.0131672	0.986833	0.0263343	0.172336	Down
KANG_GIST_WITH_PDGFRA_UP	8	0.0212955	0.0134043	0.986596	0.0268085	0.175001	Down
ALONSO_METASTASIS_EMT_UP	33	-0.00793078	0.0135377	0.986462	0.0270754	0.175774	Down
DER_IFN_BETA_RESPONSE_UP	108	0.00440522	0.013708	0.986292	0.0274159	0.177279	Down
NAKAMURA_CANCER_MICROENVIRONMENT_UP	15	-0.0366132	0.0137961	0.986204	0.0275921	0.177548	Down
REACTOME_PLATELET_ACTIVATION	149	0.00132082	0.0138105	0.986189	0.027621	0.177548	Down
IZADPANAH_STEM_CELL_ADIPOSE_VS_BONE_DN	127	0.0238887	0.0139164	0.986084	0.0278328	0.177722	Down
LEE_LIVER_CANCER_ACOX1_DN	45	-0.0016805	0.0139274	0.986073	0.0278547	0.177722	Down
TRAYNOR_RETT_SYNDROM_UP	22	0.0819567	0.0139603	0.98604	0.0279207	0.177722	Down
HOSHIDA_LIVER_CANCER_SUBCLASS_S1	262	-0.00188589	0.0139951	0.986005	0.0279902	0.177817	Down
ZHU_CMV_24_HR_DN	61	0.0141425	0.014097	0.985903	0.0281939	0.178399	Down
JAATINEN_HEMATOPOIETIC_STEM_CELL_DN	129	0.018364	0.0141706	0.985829	0.0283411	0.178399	Down
WANG_ESOPHAGUS_CANCER_VS_NORMAL_UP	121	0.0100272	0.0143941	0.985606	0.0287882	0.179112	Down
BONOME_OVARIAN_CANCER_POOR_SURVIVAL_UP	28	0.00444311	0.0144207	0.985579	0.0288413	0.179112	Down
ODONNELL_TFRC_TARGETS_UP	292	0.00559141	0.0144245	0.985575	0.028849	0.179112	Down
SMITH_TERT_TARGETS_DN	73	0.00855565	0.0144268	0.985573	0.0288536	0.179112	Down
LIANG_SILENCED_BY_METHYLATION_UP	24	0.0233469	0.0144748	0.985525	0.0289497	0.179367	Down
KANG_CISPLATIN_RESISTANCE_UP	17	-0.0222979	0.014607	0.985393	0.0292139	0.180661	Down
ABRAHAM_ALPC_VS_MULTIPLE_MYELOMA_UP	38	0.0182084	0.014662	0.985338	0.029324	0.180998	Down
MONTERO_THYROID_CANCER_POOR_SURVIVAL_DN	8	0.0720048	0.0147815	0.985218	0.029563	0.181309	Down
DER_IFN_ALPHA_RESPONSE_DN	6	0.022062	0.0148431	0.985157	0.0296861	0.181309	Down
TSAI_RESPONSE_TO_RADIATION_THERAPY	38	0.0519748	0.014977	0.985023	0.0299541	0.182083	Down
MISHRA_CARCINOMA_ASSOCIATED_FIBROBLAST_DN	25	0.0555928	0.0149816	0.985018	0.0299632	0.182083	Down
VANTVEER_BREAST_CANCER_ESR1_UP	139	0.00492115	0.0150292	0.984971	0.0300585	0.182083	Down
REACTOME_BOTULINUM_NEUROTOXICITY	20	-0.0227343	0.0152232	0.984777	0.0304463	0.182426	Down
REACTOME_PROTEOLYTIC_CLEAVAGE_OF_SNARE_COMPLEX_PROTEINS	20	-0.0227343	0.0152232	0.984777	0.0304463	0.182426	Down
DING_LUNG_CANCER_MUTATED_SIGNIFICANTLY	33	0.00529691	0.0152341	0.984766	0.0304682	0.182426	Down
ROSS_ACUTE_MYELOID_LEUKEMIA_CBF	80	-0.0052043	0.0152814	0.984719	0.0305629	0.182426	Down
MILICIC_FAMILIAL_ADENOMATOUS_POLYPOSIS_UP	4	-0.194748	0.0154285	0.984572	0.0308569	0.183509	Down
MOLENAAR_TARGETS_OF_CCND1_AND_CDK4_UP	57	0.0122372	0.0155201	0.98448	0.0310403	0.183571	Down
ST_INTERFERON_GAMMA_PATHWAY	8	0.0613523	0.0155381	0.984462	0.0310763	0.183571	Down
WONG_ENDMETRIUM_CANCER_UP	6	-0.0732919	0.0155799	0.98442	0.0311598	0.183571	Down
REACTOME_INITIAL_TRIGGERING_OF_COMPLEMENT	6	0.0908305	0.0155955	0.984405	0.0311909	0.183571	Down
BIOCARTA_IL22BP_PATHWAY	18	0.0130653	0.0156027	0.984397	0.0312053	0.183571	Down
GUTIERREZ_CHRONIC_LYMPHOCYTIC_LEUKEMIA_DN	48	0.00383403	0.0156493	0.984351	0.0312985	0.183787	Down
BLALOCK_ALZHEIMERS_DISEASE_UP	1899	-0.000197132	0.0157143	0.984286	0.0314285	0.184219	Down
KIM_WT1_TARGETS_12HR_UP	170	0.000670348	0.0158055	0.984194	0.0316111	0.184625	Down
NING_CHRONIC_OBSTRUCTIVE_PULMONARY_DISEASE_DN	71	-0.00070968	0.0159323	0.984068	0.0318645	0.185772	Down
KEGG_EPITHELIAL_CELL_SIGNALING_IN_HELICOBACTER_PYLORI_INFECTION	77	-0.00190156	0.0159726	0.984027	0.0319452	0.185909	Down
UZONYI_RESPONSE_TO_LEUKOTRIENE_AND_THROMBIN	40	0.0567381	0.0160961	0.983904	0.0321922	0.187013	Down
ACEVEDO_LIVER_CANCER_WITH_H3K9ME3_UP	60	-0.00650718	0.0161352	0.983865	0.0322703	0.187133	Down
APPEL_IMATINIB_RESPONSE	41	0.00319419	0.0162053	0.983795	0.0324105	0.187513	Down
HAEGERSTRAND_RESPONSE_TO_IMATINIB	10	0.0644095	0.0162254	0.983775	0.0324509	0.187513	Down
DACOSTA_ERCC3_ALLELE_XPCS_VS_TTD_UP	37	0.0500591	0.0162946	0.983705	0.0325892	0.187854	Down
ACEVEDO_LIVER_TUMOR_VS_NORMAL_ADJACENT_TISSUE_DN	226	-0.00374688	0.0165515	0.983449	0.0331029	0.190269	Down
SCHUETZ_BREAST_CANCER_DUCTAL_INVASIVE_DN	59	0.0032446	0.0166926	0.983307	0.0333852	0.190882	Down
PIEPOLI_LGI1_TARGETS_DN	11	-0.0753322	0.0168239	0.983176	0.0336478	0.192046	Down
NEWMAN_ERCC6_TARGETS_DN	26	-0.003578	0.0168607	0.983139	0.0337213	0.192129	Down
VERRECCHIA_EARLY_RESPONSE_TO_TGFB1	75	0.0242041	0.017235	0.982765	0.0344701	0.194819	Down
CAIRO_HEPATOBLASTOMA_DN	206	0.00321173	0.0172601	0.98274	0.0345202	0.194819	Down
KEGG_JAK_STAT_SIGNALING_PATHWAY	104	0.0145225	0.0173994	0.982601	0.0347988	0.195378	Down
BUYTAERT_PHOTODYNAMIC_THERAPY_STRESS_UP	927	0.00326085	0.0174306	0.982569	0.0348612	0.195378	Down
LEE_METASTASIS_AND_ALTERNATIVE_SPLICING_UP	77	-0.00552327	0.0174683	0.982532	0.0349366	0.195378	Down
GAUSSMANN_MLL_AF4_FUSION_TARGETS_E_DN	24	0.0318604	0.0177129	0.982287	0.0354258	0.196683	Down
LY_AGING_MIDDLE_UP	12	-0.0329514	0.0178665	0.982134	0.0357329	0.19805	Down
WAMUNYOKOLI_OVARIAN_CANCER_LMP_DN	198	0.00179242	0.0180064	0.981994	0.0360128	0.198952	Down
BIOCARTA_ASBCELL_PATHWAY	3	-0.261065	0.0180681	0.981932	0.0361361	0.198952	Down
CROONQUIST_STROMAL_STIMULATION_UP	58	0.00604195	0.0180699	0.98193	0.0361397	0.198952	Down
KEGG_GLYCOSPHINGOLIPID_BIOSYNTHESIS_GLOBO_SERIES	10	-0.014485	0.0182828	0.981717	0.0365657	0.200775	Down
DAUER_STAT3_TARGETS_UP	38	0.00729876	0.018333	0.981667	0.036666	0.200775	Down
LU_TUMOR_VASCULATURE_UP	23	0.03225	0.0183581	0.981642	0.0367161	0.200775	Down
SATO_SILENCED_BY_METHYLATION_IN_PANCREATIC_CANCER_2	33	-0.0287813	0.0183587	0.981641	0.0367174	0.200775	Down
TANG_SENESCENCE_TP53_TARGETS_UP	21	-0.0257966	0.018689	0.981311	0.037378	0.203364	Down
KEGG_SNARE_INTERACTIONS_IN_VESICULAR_TRANSPORT	56	-0.00360194	0.0188641	0.981136	0.0377281	0.204254	Down
SATO_SILENCED_BY_DEACETYLATION_IN_PANCREATIC_CANCER	34	0.0487357	0.0191086	0.980891	0.0382171	0.20655	Down
KEGG_CYTOKINE_CYTOKINE_RECEPTOR_INTERACTION	120	0.0308148	0.0192023	0.980798	0.0384046	0.20722	Down
SANCHEZ_MDM2_TARGETS	14	-0.0270684	0.019307	0.980693	0.038614	0.207338	Down
ZHANG_TARGETS_OF_EWSR1_FLI1_FUSION	108	0.00324653	0.0193336	0.980666	0.0386672	0.207338	Down
BIOCARTA_CTL_PATHWAY	6	0.0989246	0.0193929	0.980607	0.0387858	0.207338	Down
ZHOU_INFLAMMATORY_RESPONSE_LIVE_UP	320	0.00397966	0.0195616	0.980438	0.0391233	0.207338	Down
ZHAN_MULTIPLE_MYELOMA_CD1_DN	42	-0.0136175	0.0196237	0.980376	0.0392474	0.207338	Down
TAKEDA_TARGETS_OF_NUP98_HOXA9_FUSION_10D_DN	83	0.0514335	0.0196394	0.980361	0.0392789	0.207338	Down
KEGG_CYTOSOLIC_DNA_SENSING_PATHWAY	46	-0.0046637	0.0196441	0.980356	0.0392882	0.207338	Down
YAO_TEMPORAL_RESPONSE_TO_PROGESTERONE_CLUSTER_16	98	0.0167069	0.0196672	0.980333	0.0393344	0.207338	Down
DOUGLAS_BMI1_TARGETS_DN	347	0.00235468	0.0196745	0.980325	0.039349	0.207338	Down
BIOCARTA_PLATELETAPP_PATHWAY	9	0.063525	0.0196987	0.980301	0.0393974	0.207338	Down
HSIAO_LIVER_SPECIFIC_GENES	145	0.0271594	0.019754	0.980246	0.039508	0.207338	Down
MAHADEVAN_RESPONSE_TO_MP470_UP	15	-0.0262039	0.0198607	0.980139	0.0397213	0.208122	Down
REACTOME_FORMATION_OF_PLATELET_PLUG	166	0.00321709	0.0199698	0.98003	0.0399395	0.208182	Down
THUM_MIR21_TARGETS_HEART_DISEASE_UP	13	0.0277744	0.0200346	0.979965	0.0400691	0.20827	Down
COLDREN_GEFITINIB_RESISTANCE_DN	129	0.000572599	0.0200821	0.979918	0.0401643	0.208432	Down
KEGG_SPHINGOLIPID_METABOLISM	40	0.0773417	0.0201266	0.979873	0.0402531	0.208561	Down
FONTAINE_THYROID_TUMOR_UNCERTAIN_MALIGNANCY_DN	17	-0.0201666	0.0201819	0.979818	0.0403639	0.208803	Down
VERHAAK_AML_WITH_NPM1_MUTATED_UP	140	0.0105187	0.020253	0.979747	0.040506	0.209135	Down
SOTIRIOU_BREAST_CANCER_GRADE_1_VS_3_DN	45	0.0177885	0.0203103	0.97969	0.0406205	0.209135	Down
WEST_ADRENOCORTICAL_TUMOR_MARKERS_DN	21	0.225312	0.0207191	0.979281	0.0414381	0.211807	Down
FERRANDO_LYL1_NEIGHBORS	14	-0.0252225	0.020764	0.979236	0.041528	0.211807	Down
KEGG_BLADDER_CANCER	66	-0.00136515	0.0207648	0.979235	0.0415296	0.211807	Down
CUI_TCF21_TARGETS_UP	52	0.0473809	0.0208232	0.979177	0.0416463	0.212071	Down
VERRECCHIA_RESPONSE_TO_TGFB1_C2	31	-0.0058498	0.0210544	0.978946	0.0421089	0.213652	Down
GEISS_RESPONSE_TO_DSRNA_UP	37	0.0265351	0.0210964	0.978904	0.0421928	0.213652	Down
LI_WILMS_TUMOR_VS_FETAL_KIDNEY_1_UP	214	0.0113572	0.0211622	0.978838	0.0423244	0.213652	Down
SCHWAB_TARGETS_OF_BMYB_S427G_DN	13	-0.0126799	0.0212882	0.978712	0.0425765	0.213785	Down
SCHWAB_TARGETS_OF_BMYB_I624M_DN	13	-0.0126799	0.0212882	0.978712	0.0425765	0.213785	Down
BIOCARTA_AMI_PATHWAY	10	-0.00247068	0.0213827	0.978617	0.0427653	0.214089	Down
BASSO_HAIRY_CELL_LEUKEMIA_DN	90	0.0212267	0.0215009	0.978499	0.0430017	0.214943	Down
LU_TUMOR_ENDOTHELIAL_MARKERS_UP	19	0.0253459	0.0215706	0.978429	0.0431411	0.215309	Down
BARRIER_CANCER_RELAPSE_NORMAL_SAMPLE_DN	51	-0.0184194	0.0216395	0.978361	0.043279	0.215667	Down
REN_ALVEOLAR_RHABDOMYOSARCOMA_DN	591	0.0101879	0.0217096	0.97829	0.0434192	0.215706	Down
SEKI_INFLAMMATORY_RESPONSE_LPS_UP	81	0.0431629	0.0217585	0.978242	0.0435169	0.215863	Down
BIOCARTA_INTRINSIC_PATHWAY	12	0.0643932	0.0218341	0.978166	0.0436681	0.215943	Down
HELLEBREKERS_SILENCED_DURING_TUMOR_ANGIOGENESIS	60	0.0201294	0.021877	0.978123	0.0437539	0.215943	Down
RAY_ALZHEIMERS_DISEASE	4	-0.0149484	0.0219267	0.978073	0.0438535	0.215943	Down
KEGG_AUTOIMMUNE_THYROID_DISEASE	10	0.059646	0.0221094	0.977891	0.0442188	0.21638	Down
KEGG_ALLOGRAFT_REJECTION	10	0.059646	0.0221094	0.977891	0.0442188	0.21638	Down
MCLACHLAN_DENTAL_CARIES_DN	129	0.00122295	0.0221762	0.977824	0.0443525	0.216637	Down
NAKAMURA_TUMOR_ZONE_PERIPHERAL_VS_CENTRAL_DN	590	0.0060663	0.0222021	0.977798	0.0444043	0.216637	Down
XU_GH1_EXOGENOUS_TARGETS_UP	17	-0.0300559	0.0223889	0.977611	0.0447778	0.217495	Down
TONKS_TARGETS_OF_RUNX1_RUNX1T1_FUSION_SUSTAINDED_IN_ERYTHROCYTE_UP	44	-0.00671517	0.0224492	0.977551	0.0448984	0.217495	Down
BIOCARTA_TOB1_PATHWAY	12	0.0184936	0.0225082	0.977492	0.0450165	0.217495	Down
KEGG_INTESTINAL_IMMUNE_NETWORK_FOR_IGA_PRODUCTION	19	-0.039442	0.0225331	0.977467	0.0450662	0.217495	Down
MURATA_VIRULENCE_OF_H_PILORI	15	-0.0186452	0.0225398	0.97746	0.0450797	0.217495	Down
BAELDE_DIABETIC_NEPHROPATHY_UP	33	0.0192976	0.0225521	0.977448	0.0451041	0.217495	Down
GARGALOVIC_RESPONSE_TO_OXIDIZED_PHOSPHOLIPIDS_BLACK_UP	36	-0.0160311	0.0225597	0.97744	0.0451194	0.217495	Down
WANG_RECURRENT_LIVER_CANCER_DN	16	0.0295097	0.0225903	0.97741	0.0451807	0.217495	Down
VECCHI_GASTRIC_CANCER_ADVANCED_VS_EARLY_DN	58	-0.00463807	0.0227548	0.977245	0.0455096	0.218433	Down
PAPASPYRIDONOS_UNSTABLE_ATEROSCLEROTIC_PLAQUE_UP	46	0.000642259	0.022882	0.977118	0.0457639	0.21933	Down
ZUCCHI_METASTASIS_DN	23	-0.038062	0.0229614	0.977039	0.0459228	0.219446	Down
TONKS_TARGETS_OF_RUNX1_RUNX1T1_FUSION_GRANULOCYTE_DN	12	0.0269935	0.0234074	0.976593	0.0468148	0.222129	Down
BIOCARTA_BAD_PATHWAY	29	0.0374622	0.0234325	0.976567	0.0468651	0.222129	Down
BROWNE_HCMV_INFECTION_48HR_DN	506	0.0059667	0.0234806	0.976519	0.0469613	0.222129	Down
KEGG_ECM_RECEPTOR_INTERACTION	83	0.015522	0.0236141	0.976386	0.0472282	0.222676	Down
WANG_HCP_PROSTATE_CANCER	83	-0.00525067	0.0236237	0.976376	0.0472473	0.222676	Down
BOQUEST_STEM_CELL_CULTURED_VS_FRESH_DN	18	0.0985326	0.0236437	0.976356	0.0472874	0.222676	Down
TAVAZOIE_METASTASIS	58	0.00390742	0.0236751	0.976325	0.0473503	0.222676	Down
REACTOME_EICOSANOID_LIGAND_BINDING_RECEPTORS	4	-0.180845	0.0237525	0.976248	0.0475049	0.222981	Down
NATSUME_RESPONSE_TO_INTERFERON_BETA_UP	83	0.0114416	0.023776	0.976224	0.047552	0.222981	Down
VALK_AML_WITH_CEBPA	33	-0.0156901	0.0239029	0.976097	0.0478057	0.223849	Down
CASORELLI_APL_SECONDARY_VS_DE_NOVO_UP	33	0.00808121	0.0239684	0.976032	0.0479368	0.223883	Down
REACTOME_BIOLOGICAL_OXIDATIONS	69	0.00940299	0.0240117	0.975988	0.0480233	0.223883	Down
KUMAR_TARGETS_OF_MLL_AF9_FUSION	337	-0.000699373	0.0240439	0.975956	0.0480878	0.223883	Down
ZHAN_MULTIPLE_MYELOMA_CD2_UP	38	-0.00492313	0.0242367	0.975763	0.0484735	0.225357	Down
WHITE_NEUROBLASTOMA_WITH_1P36.3_DELETION	9	-0.0432315	0.0243619	0.975638	0.0487238	0.226198	Down
PASTURAL_RIZ1_TARGETS_DN	6	0.402508	0.0246018	0.975398	0.0492037	0.227777	Down
BIOCARTA_PML_PATHWAY	21	0.0189543	0.0246784	0.975322	0.0493568	0.227863	Down
REACTOME_METABOLISM_OF_LIPIDS_AND_LIPOPROTEINS	219	-0.00360464	0.0246811	0.975319	0.0493622	0.227863	Down
REACTOME_PLATELET_DEGRANULATION	78	0.00920968	0.0247417	0.975258	0.0494835	0.2281	Down
ROSS_LEUKEMIA_WITH_MLL_FUSIONS	85	0.000135285	0.0249482	0.975052	0.0498965	0.22926	Down
BREUHAHN_GROWTH_FACTOR_SIGNALING_IN_LIVER_CANCER	15	0.00243936	0.0249731	0.975027	0.0499461	0.22926	Down
LI_CISPLATIN_RESISTANCE_DN	26	0.0487095	0.0250352	0.974965	0.0500704	0.229507	Down
CHIANG_LIVER_CANCER_SUBCLASS_INTERFERON_DN	24	-0.00252316	0.0252013	0.974799	0.0504025	0.230511	Down
MASSARWEH_TAMOXIFEN_RESISTANCE_UP	534	0.00286663	0.0252155	0.974785	0.050431	0.230511	Down
BIOCARTA_COMP_PATHWAY	7	0.164467	0.0253051	0.974695	0.0506102	0.230683	Down
STEARMAN_TUMOR_FIELD_EFFECT_UP	23	0.0332081	0.0254617	0.974538	0.0509234	0.231464	Down
IVANOVA_HEMATOPOIESIS_STEM_CELL_LONG_TERM	65	-0.00112568	0.0255597	0.97444	0.0511194	0.232031	Down
LANDIS_ERBB2_BREAST_TUMORS_65_DN	52	0.0269162	0.0257935	0.974207	0.0515869	0.233219	Down
CONCANNON_APOPTOSIS_BY_EPOXOMICIN_UP	284	-0.00173198	0.0257979	0.974202	0.0515958	0.233219	Down
AMIT_SERUM_RESPONSE_40_MCF10A	37	0.0593338	0.0259278	0.974072	0.0518557	0.233655	Down
MAHAJAN_RESPONSE_TO_IL1A_UP	49	0.0192692	0.025947	0.974053	0.051894	0.233655	Down
GRANDVAUX_IRF3_TARGETS_UP	9	0.0717289	0.0259537	0.974046	0.0519073	0.233655	Down
ICHIBA_GRAFT_VERSUS_HOST_DISEASE_35D_UP	96	0.00412585	0.0261073	0.973893	0.0522146	0.233958	Down
IWANAGA_CARCINOGENESIS_BY_KRAS_PTEN_DN	305	0.00370272	0.0262177	0.973782	0.0524355	0.233958	Down
NADERI_BREAST_CANCER_PROGNOSIS_DN	24	0.082926	0.0262383	0.973762	0.0524766	0.233958	Down
MORI_PRE_BI_LYMPHOCYTE_DN	69	-0.00833696	0.0262452	0.973755	0.0524903	0.233958	Down
MCMURRAY_TP53_HRAS_COOPERATION_RESPONSE_DN	48	0.0225044	0.0263093	0.973691	0.0526186	0.233958	Down
VALK_AML_CLUSTER_11	46	0.0119078	0.0263751	0.973625	0.0527501	0.233958	Down
KIM_RESPONSE_TO_TSA_AND_DECITABINE_UP	91	0.0138404	0.0263903	0.97361	0.0527807	0.233958	Down
BERTUCCI_MEDULLARY_VS_DUCTAL_BREAST_CANCER_DN	182	0.00251978	0.0264422	0.973558	0.0528844	0.233958	Down
BOYAULT_LIVER_CANCER_SUBCLASS_G3_DN	48	0.0538864	0.0264712	0.973529	0.0529423	0.233958	Down
RICKMAN_HEAD_AND_NECK_CANCER_B	14	0.112048	0.0264852	0.973515	0.0529705	0.233958	Down
KEGG_STEROID_HORMONE_BIOSYNTHESIS	21	-0.0204489	0.0264968	0.973503	0.0529937	0.233958	Down
CAIRO_LIVER_DEVELOPMENT_DN	164	0.0133862	0.0265258	0.973474	0.0530516	0.233958	Down
SASSON_RESPONSE_TO_FORSKOLIN_UP	87	-0.00925769	0.0267466	0.973253	0.0534932	0.235587	Down
MILI_PSEUDOPODIA_CHEMOTAXIS_DN	641	0.00456034	0.0269126	0.973087	0.0538253	0.236455	Down
MORI_SMALL_PRE_BII_LYMPHOCYTE_UP	64	-0.0113948	0.0269539	0.973046	0.0539079	0.236455	Down
MULLIGHAN_MLL_SIGNATURE_2_UP	435	0.0023727	0.0271503	0.97285	0.0543005	0.236974	Down
REACTOME_CLASSICAL_ANTIBODY_MEDIATED_COMPLEMENT_ACTIVATION	2	0.407302	0.0272191	0.972781	0.0544382	0.237185	Down
NIKOLSKY_BREAST_CANCER_14Q22_AMPLICON	7	-0.0869805	0.0273046	0.972695	0.0546093	0.237612	Down
CHANG_CORE_SERUM_RESPONSE_DN	29	0.0312946	0.0275591	0.972441	0.0551183	0.239355	Down
HUANG_DASATINIB_RESISTANCE_UP	96	0.00430772	0.0275784	0.972422	0.0551567	0.239355	Down
TURASHVILI_BREAST_NORMAL_DUCTAL_VS_LOBULAR_DN	6	-0.0777844	0.0277366	0.972263	0.0554732	0.239771	Down
BENPORATH_EED_TARGETS	565	0.00337509	0.0277787	0.972221	0.0555574	0.239816	Down
FONTAINE_FOLLICULAR_THYROID_ADENOMA_DN	60	-0.0149006	0.0280484	0.971952	0.0560967	0.241073	Down
REACTOME_SYNTHESIS_OF_BILE_ACIDS_AND_BILE_SALTS_VIA_24_HYDROXYCHOLESTEROL	6	0.0207299	0.0280547	0.971945	0.0561095	0.241073	Down
COATES_MACROPHAGE_M1_VS_M2_DN	60	-0.00523629	0.0280721	0.971928	0.0561442	0.241073	Down
BASAKI_YBX1_TARGETS_DN	376	0.0101714	0.0282805	0.97172	0.056561	0.242367	Down
BOYLAN_MULTIPLE_MYELOMA_PCA1_DN	8	0.0935565	0.0282972	0.971703	0.0565944	0.242367	Down
SUNG_METASTASIS_STROMA_UP	122	0.00950491	0.0284398	0.97156	0.0568797	0.243269	Down
BIOCARTA_BLYMPHOCYTE_PATHWAY	2	-0.687225	0.0287934	0.971207	0.0575868	0.244192	Down
RODRIGUES_NTN1_AND_DCC_TARGETS	27	0.0248047	0.0289446	0.971055	0.0578892	0.244192	Down
KEGG_TYPE_II_DIABETES_MELLITUS	35	-0.0103139	0.0289569	0.971043	0.0579137	0.244192	Down
RODRIGUES_DCC_TARGETS_DN	145	0.0100141	0.0289599	0.97104	0.0579198	0.244192	Down
SMID_BREAST_CANCER_LUMINAL_A_UP	44	0.0860734	0.0290468	0.970953	0.0580935	0.244608	Down
SASSON_RESPONSE_TO_GONADOTROPHINS_UP	93	-0.00722296	0.0291646	0.970835	0.0583291	0.244667	Down
CHARAFE_BREAST_CANCER_BASAL_VS_MESENCHYMAL_UP	64	0.0050054	0.0291843	0.970816	0.0583686	0.244667	Down
VART_KSHV_INFECTION_ANGIOGENIC_MARKERS_DN	96	0.0124598	0.029211	0.970789	0.058422	0.244667	Down
KIM_LRRC3B_TARGETS	22	0.118052	0.0293301	0.97067	0.0586603	0.244676	Down
NOJIMA_SFRP2_TARGETS_DN	30	0.110806	0.0293486	0.970651	0.0586972	0.244676	Down
MORI_IMMATURE_B_LYMPHOCYTE_UP	41	0.0105225	0.0293551	0.970645	0.0587103	0.244676	Down
KEGG_MELANOMA	79	0.00190867	0.0294755	0.970524	0.0589511	0.245005	Down
TIAN_TNF_SIGNALING_VIA_NFKB	21	0.035999	0.0295315	0.970468	0.0590631	0.245005	Down
KEGG_HYPERTROPHIC_CARDIOMYOPATHY_HCM	78	-0.000717806	0.0295404	0.97046	0.0590809	0.245005	Down
GILMORE_CORE_NFKB_PATHWAY	11	-0.0637849	0.0295449	0.970455	0.0590899	0.245005	Down
YU_MYC_TARGETS_DN	37	0.00164411	0.0297137	0.970286	0.0594275	0.245857	Down
SHIPP_DLBCL_VS_FOLLICULAR_LYMPHOMA_DN	31	-0.0239006	0.0298001	0.9702	0.0596002	0.246181	Down
BIOCARTA_ERYTH_PATHWAY	8	-0.0406899	0.0298811	0.970119	0.0597623	0.246352	Down
YAGI_AML_WITH_T_8_21_TRANSLOCATION	366	0.00628195	0.0298964	0.970104	0.0597927	0.246352	Down
XU_RESPONSE_TO_TRETINOIN_UP	13	0.0606663	0.0301054	0.969895	0.0602107	0.247761	Down
ST_TYPE_I_INTERFERON_PATHWAY	8	0.0534663	0.0302248	0.969775	0.0604495	0.247805	Down
RUTELLA_RESPONSE_TO_CSF2RB_AND_IL4_DN	263	0.013602	0.03027	0.96973	0.06054	0.247864	Down
NAKAMURA_LUNG_CANCER_DIFFERENTIATION_MARKERS	5	0.0628711	0.030346	0.969654	0.0606921	0.248175	Down
FOSTER_INFLAMMATORY_RESPONSE_LPS_UP	127	-0.0018238	0.0304024	0.969598	0.0608048	0.248324	Down
BIOCARTA_GRANULOCYTES_PATHWAY	1	NA	0.0305839	0.969416	0.0611679	0.248633	Down
KOBAYASHI_EGFR_SIGNALING_6HR_UP	11	-0.0559865	0.0306973	0.969303	0.0613946	0.248633	Down
LEE_EARLY_T_LYMPHOCYTE_DN	38	-0.00645458	0.0307056	0.969294	0.0614113	0.248633	Down
ST_B_CELL_ANTIGEN_RECEPTOR	41	-0.00943676	0.0307072	0.969293	0.0614145	0.248633	Down
WELCSH_BRCA1_TARGETS_1_UP	230	0.00247157	0.0309841	0.969016	0.0619683	0.249944	Down
TONKS_TARGETS_OF_RUNX1_RUNX1T1_FUSION_SUSTAINED_IN_GRANULOCYTE_DN	9	-0.0906403	0.0310383	0.968962	0.0620765	0.250071	Down
REACTOME_G_ALPHA_Q_SIGNALLING_EVENTS	86	0.00777679	0.0311431	0.968857	0.0622862	0.250606	Down
CUI_TCF21_TARGETS_DN	28	-0.0319485	0.0311868	0.968813	0.0623736	0.250648	Down
INGA_TP53_TARGETS	25	0.0488718	0.031317	0.968683	0.062634	0.251067	Down
CHASSOT_SKIN_WOUND	10	0.402245	0.0313545	0.968646	0.0627089	0.251067	Down
BIOCARTA_CLASSIC_PATHWAY	6	0.470885	0.0315008	0.968499	0.0630017	0.251445	Down
FONTAINE_THYROID_TUMOR_UNCERTAIN_MALIGNANCY_UP	30	-0.0165648	0.0315367	0.968463	0.0630734	0.251445	Down
GRAHAM_CML_QUIESCENT_VS_CML_DIVIDING_UP	13	0.0137088	0.031556	0.968444	0.063112	0.251445	Down
ST_WNT_BETA_CATENIN_PATHWAY	30	-0.0179863	0.0316727	0.968327	0.0633454	0.252067	Down
YAMASHITA_LIVER_CANCER_STEM_CELL_UP	45	0.0404303	0.0319172	0.968083	0.0638344	0.25294	Down
ABE_INNER_EAR	20	-0.014015	0.0319554	0.968045	0.0639108	0.25294	Down
BROWNE_HCMV_INFECTION_6HR_UP	58	0.0180911	0.0320095	0.96799	0.0640191	0.25294	Down
REACTOME_CYTOCHROME_P450_ARRANGED_BY_SUBSTRATE_TYPE	16	0.0284732	0.0321609	0.967839	0.0643217	0.253783	Down
YANG_BREAST_CANCER_ESR1_LASER_UP	25	-0.0201249	0.0322793	0.967721	0.0645587	0.25395	Down
WOTTON_RUNX_TARGETS_UP	24	-0.0257043	0.0323117	0.967688	0.0646235	0.25395	Down
DIRMEIER_LMP1_RESPONSE_LATE_DN	31	-0.015301	0.0323205	0.96768	0.064641	0.25395	Down
CHIANG_LIVER_CANCER_SUBCLASS_INTERFERON_UP	18	-0.00387428	0.0323379	0.967662	0.0646758	0.25395	Down
TCGA_GLIOBLASTOMA_MUTATED	14	0.0449692	0.03253	0.96747	0.06506	0.255151	Down
NAKAMURA_ALVEOLAR_EPITHELIUM	4	-0.152453	0.0325731	0.967427	0.0651461	0.255182	Down
GENTILE_UV_HIGH_DOSE_UP	12	-0.0261178	0.0327989	0.967201	0.0655978	0.256643	Down
WIELAND_UP_BY_HBV_INFECTION	65	0.0280215	0.0332014	0.966799	0.0664028	0.25917	Down
KEGG_CHEMOKINE_SIGNALING_PATHWAY	145	0.0107549	0.0332927	0.966707	0.0665853	0.259261	Down
GAUSSMANN_MLL_AF4_FUSION_TARGETS_G_UP	139	0.0130664	0.0335054	0.966495	0.0670108	0.260606	Down
NIKOLSKY_BREAST_CANCER_19Q13.4_AMPLICON	7	-0.0936882	0.0337902	0.96621	0.0675805	0.262283	Down
AMIT_EGF_RESPONSE_20_HELA	11	0.0794451	0.033847	0.966153	0.067694	0.262283	Down
WILLIAMS_ESR2_TARGETS_UP	18	-0.0445092	0.0339195	0.966081	0.0678389	0.262283	Down
BROWNE_HCMV_INFECTION_14HR_DN	319	-0.00234063	0.0339352	0.966065	0.0678704	0.262283	Down
KAPOSI_LIVER_CANCER_POOR_SURVIVAL_DN	6	0.102202	0.0340027	0.965997	0.0680053	0.262283	Down
KOKKINAKIS_METHIONINE_DEPRIVATION_96HR_UP	138	0.0177994	0.0341849	0.965815	0.0683698	0.263066	Down
CHIARADONNA_NEOPLASTIC_TRANSFORMATION_KRAS_DN	189	0.0398485	0.0343758	0.965624	0.0687517	0.263602	Down
COWLING_MYCN_TARGETS	43	0.0320462	0.0345478	0.965452	0.0690956	0.264248	Down
KEGG_METABOLISM_OF_XENOBIOTICS_BY_CYTOCHROME_P450	33	0.0772134	0.0345765	0.965424	0.0691529	0.264248	Down
LEE_NEURAL_CREST_STEM_CELL_DN	83	-0.00565106	0.0347902	0.96521	0.0695805	0.26522	Down
CHEN_HOXA5_TARGETS_6HR_UP	5	-0.0897552	0.0348957	0.965104	0.0697914	0.265713	Down
KONDO_EZH2_TARGETS	113	0.0133828	0.0350704	0.96493	0.0701407	0.266589	Down
KIM_MYCN_AMPLIFICATION_TARGETS_DN	81	0.0106881	0.0350926	0.964907	0.0701852	0.266589	Down
KORKOLA_YOLK_SAC_TUMOR	29	0.102538	0.0351601	0.96484	0.0703203	0.266614	Down
TAKEDA_TARGETS_OF_NUP98_HOXA9_FUSION_16D_UP	111	0.0111646	0.0351776	0.964822	0.0703552	0.266614	Down
SOUCEK_MYC_TARGETS	8	0.200484	0.0354534	0.964547	0.0709067	0.267088	Down
IIZUKA_LIVER_CANCER_PROGRESSION_G2_G3_DN	7	0.0873578	0.0354558	0.964544	0.0709116	0.267088	Down
GAL_LEUKEMIC_STEM_CELL_UP	114	-0.00136772	0.0355175	0.964483	0.071035	0.267088	Down
ST_ADRENERGIC	37	-0.0195424	0.0356818	0.964318	0.0713637	0.267088	Down
REACTOME_PKA_ACTIVATION	14	-0.00310568	0.0358174	0.964183	0.0716347	0.26742	Down
SCHUHMACHER_MYC_TARGETS_DN	8	-0.106377	0.0358663	0.964134	0.0717325	0.267479	Down
MARKS_HDAC_TARGETS_UP	28	-0.00835859	0.0359547	0.964045	0.0719094	0.267832	Down
TARTE_PLASMA_CELL_VS_B_LYMPHOCYTE_DN	28	-0.0197504	0.0360147	0.963985	0.0720295	0.267973	Down
TOMLINS_PROSTATE_CANCER_DN	51	0.00513121	0.0360652	0.963935	0.0721304	0.267974	Down
SAGIV_CD24_TARGETS_DN	52	0.0242162	0.0361159	0.963884	0.0722319	0.267974	Down
TAVOR_CEBPA_TARGETS_UP	34	-0.0119045	0.0361667	0.963833	0.0723334	0.267974	Down
WONG_IFNA2_RESISTANCE_UP	6	0.00695486	0.0361899	0.96381	0.0723798	0.267974	Down
KEGG_OTHER_GLYCAN_DEGRADATION	14	0.212377	0.0364493	0.963551	0.0728986	0.26875	Down
DAZARD_UV_RESPONSE_CLUSTER_G4	14	0.0691345	0.0365935	0.963407	0.073187	0.26875	Down
ONDER_CDH1_TARGETS_1_UP	143	0.0223498	0.0366187	0.963381	0.0732373	0.26875	Down
RODRIGUES_NTN1_TARGETS_DN	161	0.00222849	0.0366917	0.963308	0.0733833	0.26875	Down
MOHANKUMAR_TLX1_TARGETS_DN	122	0.0114211	0.0366936	0.963306	0.0733871	0.26875	Down
NIELSEN_GIST_AND_SYNOVIAL_SARCOMA_UP	5	-0.0556722	0.0367016	0.963298	0.0734033	0.26875	Down
MCGARVEY_SILENCED_BY_METHYLATION_IN_COLON_CANCER	20	0.0314752	0.0367189	0.963281	0.0734378	0.26875	Down
TURASHVILI_BREAST_LOBULAR_CARCINOMA_VS_DUCTAL_NORMAL_UP	75	0.064257	0.0367377	0.963262	0.0734755	0.26875	Down
REACTOME_IMMUNOREGULATORY_INTERACTIONS_BETWEEN_A_LYMPHOID_AND_A_NON_LYMPHOID_CELL	29	-0.00438329	0.0370308	0.962969	0.0740615	0.27059	Down
CHEN_LVAD_SUPPORT_OF_FAILING_HEART_UP	93	0.0110014	0.0373827	0.962617	0.0747654	0.272551	Down
KHETCHOUMIAN_TRIM24_TARGETS_UP	48	0.0461161	0.0376016	0.962398	0.0752032	0.273535	Down
GOLUB_ALL_VS_AML_DN	11	-0.056576	0.0378443	0.962156	0.0756886	0.274687	Down
CHEBOTAEV_GR_TARGETS_UP	61	-0.00919095	0.037921	0.962079	0.075842	0.274938	Down
NIKOLSKY_BREAST_CANCER_17P11_AMPLICON	16	-0.00769576	0.038078	0.961922	0.0761559	0.275769	Down
AUJLA_IL22_AND_IL17A_SIGNALING	1	NA	0.0382856	0.961714	0.0765713	0.275814	Down
VALK_AML_CLUSTER_1	25	0.00137943	0.0382919	0.961708	0.0765837	0.275814	Down
REACTOME_CHEMOKINE_RECEPTORS_BIND_CHEMOKINES	20	0.149347	0.0382958	0.961704	0.0765916	0.275814	Down
RIGGI_EWING_SARCOMA_PROGENITOR_UP	306	0.015356	0.0383799	0.96162	0.0767598	0.276115	Down
SUZUKI_AMPLIFIED_IN_ORAL_CANCER	20	0.00904228	0.0388641	0.961136	0.0777283	0.278676	Down
REACTOME_SIGNALING_BY_PDGF	75	0.00873746	0.0389688	0.961031	0.0779376	0.278926	Down
KEGG_ABC_TRANSPORTERS	27	0.0150518	0.0391209	0.960879	0.0782417	0.279298	Down
FOURNIER_ACINAR_DEVELOPMENT_EARLY_UP	28	0.0111649	0.039186	0.960814	0.0783719	0.279298	Down
KEGG_DILATED_CARDIOMYOPATHY	88	-0.000697172	0.039208	0.960792	0.078416	0.279298	Down
ZEMBUTSU_SENSITIVITY_TO_CISPLATIN	5	0.02247	0.0393109	0.960689	0.0786218	0.279595	Down
GESERICK_TERT_TARGETS_DN	22	0.159753	0.0393354	0.960665	0.0786708	0.279595	Down
BERNARD_PPAPDC1B_TARGETS_DN	54	0.0229413	0.0400131	0.959987	0.0800261	0.283653	Down
MCLACHLAN_DENTAL_CARIES_UP	117	0.00576846	0.0400158	0.959984	0.0800317	0.283653	Down
GRUETZMANN_PANCREATIC_CANCER_UP	397	0.00268422	0.0407069	0.959293	0.0814138	0.286091	Down
BROWNE_HCMV_INFECTION_10HR_DN	67	-0.00615735	0.0407365	0.959264	0.081473	0.286091	Down
ACEVEDO_METHYLATED_IN_LIVER_CANCER_DN	428	0.00389468	0.0407398	0.95926	0.0814795	0.286091	Down
LEE_LIVER_CANCER_DENA_DN	42	0.0265554	0.0407761	0.959224	0.0815523	0.286091	Down
TAKEDA_TARGETS_OF_NUP98_HOXA9_FUSION_3D_DN	13	-0.0137397	0.0408797	0.95912	0.0817594	0.28651	Down
MOROSETTI_FACIOSCAPULOHUMERAL_MUSCULAR_DISTROPHY_DN	10	-0.0629173	0.0411236	0.958876	0.0822472	0.287292	Down
LOPES_METHYLATED_IN_COLON_CANCER_UP	16	-0.00445649	0.041224	0.958776	0.0824479	0.287685	Down
REACTOME_NCAM_SIGNALING_FOR_NEURITE_OUT_GROWTH	71	0.00443864	0.0413858	0.958614	0.0827717	0.288506	Down
BIOCARTA_TFF_PATHWAY	32	0.038761	0.0414742	0.958526	0.0829483	0.288813	Down
CREIGHTON_ENDOCRINE_THERAPY_RESISTANCE_3	643	0.00377504	0.0417426	0.958257	0.0834853	0.28948	Down
BIOCARTA_PGC1A_PATHWAY	28	0.00683965	0.0417476	0.958252	0.0834953	0.28948	Down
VARELA_ZMPSTE24_TARGETS_UP	49	-0.00133929	0.0418366	0.958163	0.0836732	0.289536	Down
HALMOS_CEBPA_TARGETS_UP	33	-0.00231892	0.041858	0.958142	0.083716	0.289536	Down
BIOCARTA_EGFR_SMRTE_PATHWAY	11	-0.0298109	0.04193	0.95807	0.0838599	0.289536	Down
REACTOME_AKT_PHOSPHORYLATES_TARGETS_IN_THE_CYTOSOL	18	-0.00890251	0.0419334	0.958067	0.0838668	0.289536	Down
KEGG_DRUG_METABOLISM_CYTOCHROME_P450	30	0.0575684	0.042118	0.957882	0.0842359	0.290057	Down
HOSHIDA_LIVER_CANCER_LATE_RECURRENCE_UP	48	0.00798302	0.0421423	0.957858	0.0842847	0.290057	Down
BROCKE_APOPTOSIS_REVERSED_BY_IL6	158	0.00679999	0.0422322	0.957768	0.0844643	0.290368	Down
CERVERA_SDHB_TARGETS_1_DN	19	0.0612158	0.0430004	0.957	0.0860007	0.295339	Down
CHANDRAN_METASTASIS_TOP50_DN	10	0.00367779	0.0431783	0.956822	0.0863566	0.295548	Down
MYLLYKANGAS_AMPLIFICATION_HOT_SPOT_29	11	0.0815664	0.0432784	0.956722	0.0865569	0.295548	Down
DAVICIONI_PAX_FOXO1_SIGNATURE_IN_ARMS_DN	22	-0.0121321	0.0432799	0.95672	0.0865597	0.295548	Down
BIOCARTA_IL2RB_PATHWAY	39	0.00336476	0.0433029	0.956697	0.0866059	0.295548	Down
BEGUM_TARGETS_OF_PAX3_FOXO1_FUSION_UP	50	0.0152801	0.0433649	0.956635	0.0867298	0.295661	Down
MAHADEVAN_IMATINIB_RESISTANCE_DN	9	0.0588184	0.0435933	0.956407	0.0871865	0.296908	Down
BIOCARTA_CTCF_PATHWAY	30	-0.00619381	0.043699	0.956301	0.087398	0.297057	Down
KEGG_TOLL_LIKE_RECEPTOR_SIGNALING_PATHWAY	102	-0.00709786	0.0437226	0.956277	0.0874452	0.297057	Down
SIG_CD40PATHWAYMAP	48	-0.0119764	0.043869	0.956131	0.087738	0.297417	Down
REACTOME_COMPLEMENT_CASCADE	8	0.230861	0.0438962	0.956104	0.0877924	0.297417	Down
VANHARANTA_UTERINE_FIBROID_UP	54	-0.00339123	0.0440157	0.955984	0.0880313	0.297917	Down
REACTOME_XENOBIOTICS	2	-0.0272665	0.0441614	0.955839	0.0883227	0.298401	Down
MILICIC_FAMILIAL_ADENOMATOUS_POLYPOSIS_DN	7	0.068263	0.0443683	0.955632	0.0887366	0.298869	Down
BIOCARTA_NTHI_PATHWAY	28	-0.0238417	0.0443856	0.955614	0.0887711	0.298869	Down
REACTOME_GLUCAGON_SIGNALING_IN_METABOLIC_REGULATION	31	-0.0232665	0.0445237	0.955476	0.0890474	0.29949	Down
REACTOME_ENDOGENOUS_STEROLS	9	0.0576635	0.0447342	0.955266	0.0894683	0.300286	Down
FRIDMAN_SENESCENCE_UP	112	0.0142284	0.0449455	0.955054	0.0898911	0.301134	Down
REACTOME_TRKA_SIGNALLING_FROM_THE_PLASMA_MEMBRANE	124	-0.00401252	0.044953	0.955047	0.0899061	0.301134	Down
AMUNDSON_POOR_SURVIVAL_AFTER_GAMMA_RADIATION_8G	102	-0.000136226	0.0452017	0.954798	0.0904033	0.302172	Down
KEGG_GRAFT_VERSUS_HOST_DISEASE	9	0.168355	0.045247	0.954753	0.0904939	0.302172	Down
SHARMA_PILOCYTIC_ASTROCYTOMA_LOCATION_DN	6	-0.115054	0.0454143	0.954586	0.0908285	0.302819	Down
VALK_AML_CLUSTER_9	37	-0.000441832	0.0455449	0.954455	0.0910899	0.30292	Down
KEGG_FOCAL_ADHESION	224	0.00163068	0.0457032	0.954297	0.0914065	0.303588	Down
FARMER_BREAST_CANCER_APOCRINE VS LUMINAL	297	0.00133032	0.0457384	0.954262	0.0914768	0.303588	Down
REACTOME_REGULATION_OF_INSULIN_SECRETION_BY_GLUCAGON_LIKE_PEPTIDE_1	50	-0.00727192	0.0458337	0.954166	0.0916673	0.303602	Down
KEGG_TAURINE_AND_HYPOTAURINE_METABOLISM	7	-0.0299708	0.0459345	0.954065	0.0918691	0.303708	Down
DELYS_THYROID_CANCER_UP	375	0.0132675	0.0459537	0.954046	0.0919074	0.303708	Down
REACTOME_G_BETA_GAMMA_SIGNALLING_THROUGH_PLC_BETA	17	-0.0427447	0.0460218	0.953978	0.0920435	0.303708	Down
REACTOME_NCAM1_INTERACTIONS	39	0.0627081	0.0460499	0.95395	0.0920999	0.303708	Down
JI_RESPONSE_TO_FSH_UP	68	-0.00717387	0.0460827	0.953917	0.0921654	0.303708	Down
MILI_PSEUDOPODIA_HAPTOTAXIS_DN	859	0.00279611	0.0462942	0.953706	0.0925884	0.304215	Down
REACTOME_FORMATION_OF_FIBRIN_CLOT_CLOTTING_CASCADE	11	0.0247837	0.0465045	0.953495	0.0930091	0.304946	Down
SCHLOSSER_SERUM_RESPONSE_UP	149	-0.00158088	0.0467423	0.953258	0.0934846	0.305747	Down
ZHAN_MULTIPLE_MYELOMA_DN	27	-0.0123179	0.0467829	0.953217	0.0935658	0.305747	Down
AMIT_EGF_RESPONSE_40_MCF10A	24	0.0472395	0.0467976	0.953202	0.0935952	0.305747	Down
HENDRICKS_SMARCA4_TARGETS_DN	35	-0.00437503	0.0469139	0.953086	0.0938278	0.305747	Down
TONKS_TARGETS_OF_RUNX1_RUNX1T1_FUSION_HSC_DN	143	0.0135971	0.0470152	0.952985	0.0940303	0.305747	Down
YAUCH_HEDGEHOG_SIGNALING_PARACRINE_UP	107	0.000121315	0.0470307	0.952969	0.0940614	0.305747	Down
GUTIERREZ_WALDENSTROEMS_MACROGLOBULINEMIA_1_DN	4	0.444373	0.0472923	0.952708	0.0945847	0.305747	Down
LEI_MYB_TARGETS	7	0.0152525	0.0474236	0.952576	0.0948472	0.305747	Down
DOANE_BREAST_CANCER_CLASSES_UP	49	0.018668	0.0474413	0.952559	0.0948825	0.305747	Down
SAKAI_CHRONIC_HEPATITIS_VS_LIVER_CANCER_DN	25	-0.0258677	0.047471	0.952529	0.0949421	0.305747	Down
KEGG_GLYCOSAMINOGLYCAN_DEGRADATION	22	0.0543563	0.0476708	0.952329	0.0953416	0.306428	Down
ELVIDGE_HYPOXIA_UP	220	0.00993081	0.0479736	0.952026	0.0959471	0.308042	Down
MANALO_HYPOXIA_UP	199	0.020147	0.0481022	0.951898	0.0962043	0.308042	Down
YAO_TEMPORAL_RESPONSE_TO_PROGESTERONE_CLUSTER_15	38	-0.00589419	0.048111	0.951889	0.0962219	0.308042	Down
HINATA_NFKB_TARGETS_FIBROBLAST_UP	69	0.00217447	0.0481965	0.951803	0.0963931	0.308288	Down
BONOME_OVARIAN_CANCER_SURVIVAL_SUBOPTIMAL_DEBULKING	543	0.000305848	0.0485313	0.951469	0.0970626	0.308774	Down
BIOCARTA_TCAPOPTOSIS_PATHWAY	2	0.915794	0.0485988	0.951401	0.0971976	0.308774	Down
WILCOX_PRESPONSE_TO_ROGESTERONE_DN	62	0.018712	0.0486874	0.951313	0.0973749	0.308774	Down
BIOCARTA_CYTOKINE_PATHWAY	4	0.151825	0.0487447	0.951255	0.0974894	0.308774	Down
XU_RESPONSE_TO_TRETINOIN_AND_NSC682994_UP	17	0.112208	0.0487537	0.951246	0.0975074	0.308774	Down
WANG_ESOPHAGUS_CANCER_VS_NORMAL_DN	95	-0.00763822	0.0487694	0.951231	0.0975388	0.308774	Down
REACTOME_SIGNALING_BY_TGF_BETA	17	-0.0310362	0.0487792	0.951221	0.0975584	0.308774	Down
BIOCARTA_AGR_PATHWAY	46	-0.00801056	0.0487937	0.951206	0.0975874	0.308774	Down
GARGALOVIC_RESPONSE_TO_OXIDIZED_PHOSPHOLIPIDS_GREY_UP	21	0.0731357	0.0490049	0.950995	0.0980098	0.309001	Down
DAZARD_UV_RESPONSE_CLUSTER_G3	14	-0.00337007	0.0490962	0.950904	0.0981925	0.309001	Down
BACOLOD_RESISTANCE_TO_ALKYLATING_AGENTS_UP	29	0.0400189	0.0491173	0.950883	0.0982345	0.309001	Down
CHIANG_LIVER_CANCER_SUBCLASS_PROLIFERATION_DN	95	0.00755234	0.0491177	0.950882	0.0982354	0.309001	Down
BIOCARTA_TID_PATHWAY	27	0.0652738	0.0491614	0.950839	0.0983228	0.309001	Down
MORI_LARGE_PRE_BII_LYMPHOCYTE_DN	39	-0.00357212	0.0493425	0.950657	0.0986851	0.309372	Down
SUH_COEXPRESSED_WITH_ID1_AND_ID2_UP	20	0.0747298	0.0493512	0.950649	0.0987024	0.309372	Down
BECKER_TAMOXIFEN_RESISTANCE_UP	35	0.00452138	0.0494489	0.950551	0.0988977	0.309372	Down
SCHLESINGER_METHYLATED_IN_COLON_CANCER	7	0.284869	0.0495125	0.950488	0.0990249	0.309372	Down
REACTOME_GS_ALPHA_MEDIATED_EVENTS_IN_GLUCAGON_SIGNALLING	25	-0.0265456	0.0495319	0.950468	0.0990637	0.309372	Down
REACTOME_ADENYLATE_CYCLASE_ACTIVATING_PATHWAY	9	0.0702711	0.0496951	0.950305	0.0993902	0.309372	Down
STREICHER_LSM1_TARGETS_DN	19	0.00740349	0.0497739	0.950226	0.0995478	0.309508	Down
GAZDA_DIAMOND_BLACKFAN_ANEMIA_ERYTHROID_DN	458	-0.00134429	0.0498594	0.950141	0.0997189	0.309508	Down
Differentially expressed genes
ProbeID	TargetID	Symbol	logFC	AveExpr	t	P.Value	adj.P.Val	B
2190162	LOC100040020	NA	3.606	7.56218	31.3566	1.17e-09	2e-05	10.7108
2630767	KLRA22	Klra22	2.21	6.23121	21.7645	2.11e-08	0.00014	9.15806
4150612	SMCHD1	Smchd1	-2.511	7.7456	-21.3221	2.48e-08	0.00014	9.05403
6660279	KLRA33	Klra33	2.971	9.20213	15.3969	3.16e-07	0.00081	7.19164
1470369	KLRA4	Klra4	2.82	7.79072	16.0151	2.33e-07	0.00081	7.43626
540398	E130012A19RIK	E130012A19Rik	2.018	7.19966	15.5434	2.94e-07	0.00081	7.25091
2320093	SPIN2	Spin2	1.881	6.5928	15.2563	3.4e-07	0.00081	7.13394
2570707	LOC100038894	NA	2.754	10.0296	13.9662	6.73e-07	0.0012	6.56628
1070341	4933439C20RIK	Pisd-ps3	1.351	10.6866	13.5248	8.62e-07	0.0012	6.35491
2000373	SERPING1	Serping1	-1.337	9.58721	-13.3023	9.79e-07	0.0012	6.24472
1110445	LOC380706	NA	-1.394	9.96882	-13.0134	1.16e-06	0.0012	6.09794
1940605	ACE	Ace	-1.44	5.99424	-13.1752	1.05e-06	0.0012	6.18069
460221	LOC100038882	NA	-1.471	11.5085	-12.8854	1.25e-06	0.0012	6.03148
2490452	LOC100048346	NA	-1.578	9.95577	-12.8698	1.26e-06	0.0012	6.02331
520278	MX2	Mx2	-1.745	7.82718	-13.7714	7.5e-07	0.0012	6.47414
7510020	IFIT3	Ifit3	-1.746	9.97218	-13.0441	1.14e-06	0.0012	6.11375
2490653	EG240327	Gm4951	-1.859	5.74279	-13.855	7.16e-07	0.0012	6.51391
4610139	USP18	Usp18	-1.885	8.89344	-12.8216	1.3e-06	0.0012	5.99803
3710673	KLRA16	Klra16	2.585	6.87546	12.1303	1.98e-06	0.00125	5.62121
6060433	GJB3	Gjb3	1.81	7.06738	12.3773	1.7e-06	0.00125	5.75899
3290747	BEX2	Bex2	1.496	8.68232	12.1575	1.95e-06	0.00125	5.63655
1400041	GBP2	Gbp2	-1.148	10.7232	-12.0924	2.03e-06	0.00125	5.59976
2230687	NOPE	Igdcc4	-1.376	8.35837	-12.5472	1.53e-06	0.00125	5.85171
2230386	IIGP2	Irgm2	-1.476	9.29074	-12.3406	1.74e-06	0.00125	5.73874
60553	GBP3	Gbp3	-1.602	8.91767	-12.117	2e-06	0.00125	5.61369
4900296	PRSS35	Prss35	-1.65	6.74637	-12.2669	1.82e-06	0.00125	5.69787
4830543	IFI27	Ifi27l2a	-2.152	9.88276	-12.3091	1.77e-06	0.00125	5.72131
5550437	CSF2RA	Csf2ra	1.85	7.11396	11.9624	2.21e-06	0.00131	5.52556
7320053	GPX3	Gpx3	-1.147	9.17528	-11.8563	2.36e-06	0.00131	5.46419
7160603	SEPP1	Sepp1	-1.188	7.4509	-11.7499	2.53e-06	0.00131	5.402
2970521	PARP14	Parp14	-1.379	8.60487	-11.6603	2.68e-06	0.00131	5.34902
7050014	OASL2	Oasl2	-1.554	6.5386	-11.7014	2.61e-06	0.00131	5.3734
1580528	USP18	Usp18	-1.613	10.6987	-11.8473	2.37e-06	0.00131	5.45893
2100139	BST2	Bst2	-1.697	9.97336	-11.7305	2.56e-06	0.00131	5.39056
1990307	C1QTNF2	C1qtnf2	-1.437	8.57991	-11.4534	3.07e-06	0.00146	5.22484
4640653	GABRB3	Gabrb3	1.289	5.46068	11.343	3.3e-06	0.00149	5.15745
1690475	GBP3	Gbp3	-1.567	9.36181	-11.3574	3.27e-06	0.00149	5.16628
1500347	CRISP1	Crisp1	2.018	5.73465	10.9734	4.24e-06	0.00181	4.92594
4810324	SERPING1	Serping1	-1.394	8.97003	-11.0016	4.16e-06	0.00181	4.9439
5360228	LOR	Lor	1.545	6.7174	10.5204	5.83e-06	0.00237	4.6291
1440543	H19	H19	-1.167	13.8363	-10.4858	5.98e-06	0.00237	4.60585
5360674	ACE	Ace	-1.413	10.8352	-10.4931	5.94e-06	0.00237	4.61076
3800300	LOC100041569	NA	1.222	7.5302	10.2954	6.86e-06	0.00246	4.47611
160463	LGALS3BP	Lgals3bp	-1.168	10.6064	-10.2871	6.9e-06	0.00246	4.47038
6290037	IGTP	Igtp	-1.374	8.79	-10.3661	6.51e-06	0.00246	4.5246
110458	ADH1	Adh1	-1.851	7.6055	-10.3211	6.73e-06	0.00246	4.49382
1400053	LOC100047583	NA	-1.97	10.9649	-10.2775	6.95e-06	0.00246	4.46379
7000398	LOC673578	NA	2.388	6.18236	10.2078	7.31e-06	0.00248	4.41551
6590653	IRF7	Irf7	-1.62	6.4599	-10.221	7.24e-06	0.00248	4.42467
5420170	GBP6	Gbp6	-1.434	6.10133	-10.1127	7.84e-06	0.00261	4.34909
6350114	UBE2L6	Ube2l6	-0.955	8.91919	-10.0437	8.25e-06	0.00269	4.30041
4830010	OASL2	Oasl2	-1.573	9.87635	-9.95309	8.83e-06	0.00282	4.2359
2810040	D14ERTD668E	D14Ertd668e	-1.129	7.62229	-9.86407	9.44e-06	0.00296	4.1719
4490367	NDN	Ndn	1.315	12.3448	9.75297	1.03e-05	0.00305	4.09112
6510500	CDCA7	Cdca7	0.956	10.6619	9.7477	1.03e-05	0.00305	4.08726
7000097	LOC100044257	NA	-0.969	7.53291	-9.73169	1.04e-05	0.00305	4.07553
520053	D14ERTD668E	D14Ertd668e	-1.275	7.06037	-9.76828	1.01e-05	0.00305	4.10231
1030632	PCDHB22	Pcdhb22	1.462	8.40879	9.33873	1.42e-05	0.00346	3.78079
5960465	LOC382691	NA	0.934	8.6443	9.26852	1.5e-05	0.00346	3.72672
1990021	ENSMUSG00000068790	NA	0.931	9.42588	9.44192	1.31e-05	0.00346	3.85948
1090438	ATF3	Atf3	-0.946	8.49368	-9.28125	1.48e-05	0.00346	3.73656
7050546	HIST2H2AA1	Hist2h2aa1	-0.947	10.1655	-9.46261	1.28e-05	0.00346	3.87513
6560431	LOC100046469	NA	-0.981	5.80348	-9.46069	1.29e-05	0.00346	3.87369
5900152	FBLN2	Fbln2	-1.011	7.40671	-9.32063	1.44e-05	0.00346	3.76689
1660687	PPAP2B	Ppap2b	-1.053	10.2555	-9.4231	1.33e-05	0.00346	3.8452
3890500	GPC3	Gpc3	-1.076	10.8402	-9.36728	1.38e-05	0.00346	3.80266
5670273	1110067I12RIK	Lrrn4cl	-1.103	8.32321	-9.48131	1.27e-05	0.00346	3.88926
4210129	SOCS2	Socs2	-1.173	9.1342	-9.37384	1.38e-05	0.00346	3.80767
4150193	ANPEP	Anpep	-1.283	6.24187	-9.29099	1.47e-05	0.00346	3.74408
6380427	MMP1A	Mmp1a	-1.443	8.85139	-9.28027	1.48e-05	0.00346	3.7358
1090139	IFI47	Ifi47	-1.716	6.02353	-9.2923	1.47e-05	0.00346	3.74509
6760474	ZCCHC5	Zcchc5	-2.311	6.93478	-9.29667	1.46e-05	0.00346	3.74845
940068	BEST1	Best1	-1.233	6.23146	-9.19992	1.58e-05	0.00356	3.67347
5870601	PTPRD	Ptprd	-1.235	5.9077	-9.21056	1.57e-05	0.00356	3.68176
630463	SGIP1	Sgip1	-0.943	5.44402	-9.12637	1.68e-05	0.00372	3.61591
6590630	GPR23	Lpar4	-0.995	9.65391	-9.08119	1.74e-05	0.00372	3.5803
2760577	RTP4	Rtp4	-1.016	5.7746	-9.08017	1.74e-05	0.00372	3.57949
4850521	ADH1	Adh1	-1.396	7.2571	-9.11021	1.7e-05	0.00372	3.60319
4120719	SRPX2	Srpx2	-0.878	9.03484	-9.0147	1.84e-05	0.00387	3.52756
1110162	BEX2	Bex2	1.523	7.60011	8.96632	1.91e-05	0.00388	3.48893
3120497	NPTX2	Nptx2	1.096	5.89016	8.98296	1.89e-05	0.00388	3.50225
510056	LOC382707	NA	1.01	8.83847	8.97179	1.9e-05	0.00388	3.49331
3390735	NASP	Nasp	0.951	9.81493	8.92363	1.98e-05	0.00388	3.45467
5050653	IGF2	Igf2	-0.975	14.628	-8.93145	1.97e-05	0.00388	3.46096
160735	SMCHD1	Smchd1	-0.983	5.4228	-8.93673	1.96e-05	0.00388	3.4652
5130066	UBE1L	Uba7	-1.231	9.54894	-8.90629	2.01e-05	0.00389	3.44069
4210470	C2	C2	-1.643	10.2111	-8.87539	2.06e-05	0.00394	3.41574
10592	3632451O06RIK	3632451O06Rik	1.401	5.7537	8.85018	2.1e-05	0.00398	3.3953
2070328	2610002D18RIK	2610002D18Rik	1.171	7.402	8.77913	2.23e-05	0.00413	3.3374
4610451	GHR	Ghr	-0.947	11.1023	-8.78643	2.22e-05	0.00413	3.34338
6040689	CYP2F2	Cyp2f2	-2.239	6.80159	-8.75802	2.27e-05	0.00415	3.3201
4250646	3110007F17RIK	3110007F17Rik	1.067	6.52958	8.71909	2.35e-05	0.00424	3.28809
4890626	LCN2	Lcn2	-1.602	6.53062	-8.6995	2.39e-05	0.00427	3.27193
240553	C130092E12	Setbp1	-0.898	7.93209	-8.68633	2.41e-05	0.00427	3.26104
5360300	LPL	Lpl	-1.004	10.6772	-8.63382	2.52e-05	0.00432	3.21747
3290523	GAS6	Gas6	-1.186	10.337	-8.62285	2.54e-05	0.00432	3.20833
1410554	TYKI	Cmpk2	-1.278	6.77044	-8.63873	2.51e-05	0.00432	3.22155
6960079	ELN	Eln	-1.672	7.83195	-8.63318	2.52e-05	0.00432	3.21693
1990504	MKRN3	Mkrn3	1.293	6.69726	8.54373	2.72e-05	0.00457	3.14207
1110670	HIST2H2AA2	Hist2h2aa2	-0.784	10.3029	-8.51597	2.79e-05	0.00464	3.11868
270717	DTX3L	Dtx3l	-0.917	8.63206	-8.47267	2.89e-05	0.00471	3.08204
780253	SLC10A6	Slc10a6	-0.991	6.28816	-8.47685	2.88e-05	0.00471	3.08558
3460504	LOC667370	NA	-1.624	7.19639	-8.46421	2.91e-05	0.00471	3.07486
5810021	CDON	Cdon	-0.983	8.54881	-8.34085	3.24e-05	0.00519	2.96932
7320739	GPR23	Lpar4	-0.818	11.1892	-8.29166	3.38e-05	0.00534	2.92681
6420687	MMP12	Mmp12	-0.959	5.31512	-8.27381	3.44e-05	0.00534	2.91132
6590167	FCGRT	Fcgrt	-1.033	11.269	-8.27826	3.42e-05	0.00534	2.91518
4280047	SHCBP1	Shcbp1	0.843	7.74991	8.2593	3.48e-05	0.00536	2.89871
3840523	KIF23	Kif23	1.146	8.12296	8.21917	3.6e-05	0.00541	2.86371
870619	LRP11	Lrp11	1.043	8.35989	8.20507	3.65e-05	0.00541	2.85137
360187	CYP7B1	Cyp7b1	-0.917	8.9818	-8.20593	3.65e-05	0.00541	2.85212
1470605	RNF213	Rnf213	-0.937	11.3386	-8.22847	3.58e-05	0.00541	2.87183
6290592	AI607873	AI607873	-1.299	7.71575	-8.18872	3.7e-05	0.00541	2.83704
130598	OAS1G	Oas1g	-1.477	7.77265	-8.1945	3.68e-05	0.00541	2.8421
10170	CLEC4D	Clec4d	1.571	5.6473	8.14624	3.84e-05	0.00543	2.79967
4760066	RSPH1	Rsph1	1.276	5.69613	8.15969	3.8e-05	0.00543	2.81152
2360022	C1S	C1s	-1.293	7.13453	-8.14374	3.85e-05	0.00543	2.79746
670670	IFIT3	Ifit3	-1.365	7.30511	-8.14783	3.84e-05	0.00543	2.80107
3120484	DDX21	Ddx21	0.915	8.92047	8.11028	3.97e-05	0.00555	2.76789
2360189	KIF11	Kif11	0.744	8.21547	8.08627	4.06e-05	0.00558	2.74659
6420520	FOSB	Fosb	-1.104	10.8323	-8.08631	4.05e-05	0.00558	2.74662
3060477	MYBL2	Mybl2	1.036	7.7856	8.05175	4.18e-05	0.00566	2.71586
3370136	GPC3	Gpc3	-0.996	11.0513	-8.0535	4.18e-05	0.00566	2.71742
5820608	IRGM	Irgm1	-1.015	9.38922	-7.95276	4.57e-05	0.00613	2.62704
7570563	ADAMTS2	Adamts2	-1.127	9.75734	-7.93787	4.63e-05	0.00617	2.61359
6060367	RARRES2	Rarres2	-1.581	7.52483	-7.92044	4.71e-05	0.00622	2.59781
4480753	2410018L13RIK	2410018L13Rik	0.902	6.95084	7.85466	5e-05	0.00652	2.53797
610184	TRIM34	Trim34a	-1.204	5.95008	-7.85009	5.02e-05	0.00652	2.5338
6900112	LOC219106	NA	0.788	8.28623	7.80729	5.22e-05	0.00661	2.49459
1820274	CDCA2	Cdca2	0.782	9.92205	7.82743	5.12e-05	0.00661	2.51306
1500722	PLD3	Pld3	-0.88	9.67828	-7.80292	5.24e-05	0.00661	2.49057
3170711	EYA1	Eya1	-1.457	5.8952	-7.81197	5.2e-05	0.00661	2.49888
2970332	KLF2	Klf2	-1.033	10.0163	-7.78061	5.35e-05	0.00669	2.47004
4540477	C920004C08RIK	Ctse	0.828	10.6102	7.74058	5.55e-05	0.00684	2.43306
2000647	IGF1	Igf1	-1.068	8.37141	-7.74441	5.53e-05	0.00684	2.43661
1300246	ELAVL2	Elavl2	1.867	6.64181	7.70471	5.74e-05	0.00687	2.39978
7560376	LPIN1	Lpin1	-0.763	6.21783	-7.71008	5.71e-05	0.00687	2.40477
5390131	LGALS9	Lgals9	-0.992	8.52118	-7.70563	5.73e-05	0.00687	2.40063
4610504	1500015O10RIK	1500015O10Rik	-1.737	6.37452	-7.71994	5.66e-05	0.00687	2.41392
3130246	SNURF	Snurf	0.965	9.04306	7.68638	5.83e-05	0.00689	2.38271
240725	STAT1	Stat1	-1.016	9.48185	-7.68802	5.83e-05	0.00689	2.38423
1470553	CPXM1	Cpxm1	-0.933	10.7143	-7.6728	5.91e-05	0.00692	2.37004
7320239	RECK	Reck	-0.953	7.6543	-7.64166	6.08e-05	0.00708	2.34092
4490750	TBXA2R	Tbxa2r	-0.872	6.064	-7.62725	6.16e-05	0.00712	2.3274
4040209	D130017D19RIK	NA	1.191	6.40578	7.61741	6.22e-05	0.00714	2.31815
5670398	TRIM21	Trim21	-0.82	8.25379	-7.60294	6.31e-05	0.00719	2.30454
6550672	PTPRD	Ptprd	-1.16	7.31483	-7.59393	6.36e-05	0.0072	2.29606
4920300	MSLN	Msln	1.637	5.94044	7.57651	6.46e-05	0.00727	2.27962
4180475	LUM	Lum	-1.593	11.2273	-7.55249	6.61e-05	0.00738	2.2569
2120520	GHR	Ghr	-0.995	6.91627	-7.52824	6.77e-05	0.00751	2.23389
1500246	LOC626578	NA	-0.993	5.7029	-7.51733	6.84e-05	0.00753	2.22351
4040167	SPIN2	Spin2	1.478	6.31736	7.48613	7.04e-05	0.00771	2.19377
6980315	CLSPN	Clspn	0.988	7.67996	7.43448	7.39e-05	0.00804	2.14429
3180019	GNG2	Gng2	-0.735	7.82864	-7.42554	7.46e-05	0.00806	2.1357
6180379	LOC545013	NA	1.638	6.84281	7.39708	7.66e-05	0.00816	2.10827
6420196	RRP1B	Rrp1b	0.685	10.1001	7.39238	7.7e-05	0.00816	2.10374
3290301	PODN	Podn	-1.805	7.85222	-7.40418	7.61e-05	0.00816	2.11512
3310674	ELMO3	Elmo3	-0.93	6.93186	-7.3266	8.2e-05	0.00864	2.03993
1240504	LOC100044221	NA	0.896	5.87455	7.30938	8.34e-05	0.00867	2.02315
2710703	E130306D19RIK	E130306D19Rik	0.829	8.08473	7.29391	8.46e-05	0.00867	2.00804
4220041	LOC100046844	NA	-0.727	5.7643	-7.302	8.4e-05	0.00867	2.01594
150022	NFKBIA	Nfkbia	-0.81	11.381	-7.30686	8.36e-05	0.00867	2.02069
4050136	ITGA11	Itga11	-1.048	8.69271	-7.29027	8.49e-05	0.00867	2.00448
1400605	USP1	Usp1	0.685	7.71553	7.27721	8.6e-05	0.00867	1.99169
430132	LGALS9	Lgals9	-1.113	8.52273	-7.28107	8.57e-05	0.00867	1.99547
5910452	CTSF	Ctsf	-0.954	7.06566	-7.26109	8.74e-05	0.00876	1.97589
1030519	ID2	Id2	-0.869	8.58396	-7.25419	8.79e-05	0.00876	1.96911
520692	LYPD6	Lypd6	1.303	5.75259	7.24766	8.85e-05	0.00877	1.9627
6510255	2810405F04RIK	NA	1.909	6.44212	7.21605	9.13e-05	0.00881	1.93156
4780360	TROAP	Troap	0.68	9.63752	7.21272	9.16e-05	0.00881	1.92827
2650754	UBE2L6	Ube2l6	-0.864	9.26565	-7.22972	9.01e-05	0.00881	1.94504
5220475	B230373P09RIK	Dnahc1	-0.992	6.95182	-7.21835	9.11e-05	0.00881	1.93382
3520082	SRPX2	Srpx2	-1.047	7.31885	-7.22175	9.08e-05	0.00881	1.93718
5890221	FAS	Fas	-0.705	7.85414	-7.20147	9.26e-05	0.00885	1.91715
4390538	ITM2A	Itm2a	-1.212	10.6954	-7.18877	9.37e-05	0.00891	1.90459
2490475	KLHDC1	Klhdc1	-0.792	6.2593	-7.16591	9.59e-05	0.00906	1.88191
4900168	OSR2	Osr2	-1.3	10.92	-7.13382	9.89e-05	0.0093	1.84999
4850079	KIF23	Kif23	0.741	9.66035	7.1245	9.98e-05	0.00933	1.84068
4890706	ACE	Ace	-1.235	5.77277	-7.11749	0.000100526	0.00935	1.83369
70601	WFDC2	Wfdc2	2.146	10.2562	7.10426	0.000101846	0.00936	1.82046
1230142	GDNF	Gdnf	-0.939	7.81283	-7.10749	0.000101522	0.00936	1.82369
3850324	LOC100046469	NA	-0.937	6.31838	-7.07792	0.000104531	0.00956	1.79406
1240348	MYLK	Mylk	-0.761	6.09847	-7.05829	0.000106583	0.00969	1.77433
1500446	CDCA8	Cdca8	0.808	9.40621	7.03889	0.000108655	0.00977	1.75479
5870093	TAP1	Tap1	-0.995	7.32973	-7.04095	0.000108433	0.00977	1.75686
3800242	TERA-PENDING	NA	0.974	6.88371	7.03011	0.000109608	0.00979	1.74592
610743	NASP	Nasp	0.691	9.93232	7.02674	0.000109976	0.00979	1.74251
6760692	LOC100046056	NA	-0.657	10.1988	-7.01163	0.000111642	0.00983	1.72724
2570280	ACPP	Acpp	-0.934	8.63971	-7.01196	0.000111606	0.00983	1.72757
4390553	6330505N24RIK	Fhdc1	0.747	9.59055	6.98812	0.000114293	0.00987	1.70341
6200397	LHFPL2	Lhfpl2	-0.743	10.2616	-6.99501	0.000113508	0.00987	1.7104
5570379	ACAD10	Acad10	-0.868	6.2822	-6.98658	0.000114468	0.00987	1.70185
3170047	NRAP	Nrap	-1.037	5.679	-6.98967	0.000114116	0.00987	1.70498
4010019	IFITM1	Ifitm1	-0.934	9.44846	-6.95788	0.000117803	0.0101	1.67266
1740653	F2RL1	F2rl1	1.022	8.769	6.94241	0.000119645	0.01021	1.65688
2350095	BUB1B	Bub1b	0.655	9.90257	6.93341	0.000120731	0.01025	1.64769
2760148	ADAMTS2	Adamts2	-1.291	7.47486	-6.92463	0.000121801	0.01029	1.63872
6350132	CTSL	Ctsl	-0.817	8.33241	-6.91041	0.000123558	0.01033	1.62415
1450095	ICAM1	Icam1	-1.104	8.4549	-6.91255	0.000123291	0.01033	1.62635
4810554	ARHGAP20	Arhgap20	-1.205	6.18461	-6.90403	0.000124355	0.01035	1.61761
3710136	2310033F14RIK	2310033F14Rik	-0.671	11.7416	-6.8967	0.000125277	0.01037	1.61009
3830129	CRMP1	Crmp1	1.255	7.16712	6.85663	0.000130456	0.01075	1.56886
6330114	KIF15	Kif15	0.794	8.80276	6.83748	0.000133015	0.0109	1.54907
5270670	MMP3	Mmp3	-1.21	14.2014	-6.81993	0.000135409	0.01097	1.53091
6650021	LUM	Lum	-1.488	9.02058	-6.82513	0.000134694	0.01097	1.53629
2940577	E430002G05RIK	Pamr1	-1.898	7.16647	-6.81728	0.000135773	0.01097	1.52817
1580626	SGOL1	Sgol1	0.706	9.18001	6.8113	0.000136603	0.01098	1.52196
2360703	ITGA3	Itga3	0.862	9.27377	6.78893	0.000139753	0.01105	1.49872
3180438	2010317E24RIK	2010317E24Rik	0.814	8.11951	6.78655	0.000140093	0.01105	1.49625
6290239	4632401N01RIK	NA	-0.691	9.56688	-6.78738	0.000139975	0.01105	1.49711
990687	QPCT	Qpct	-1.123	8.0231	-6.79475	0.000138926	0.01105	1.50477
7550156	CCNB1	Ccnb1	0.636	9.75629	6.77316	0.000142023	0.01115	1.4823
130603	RUNX1T1	Runx1t1	-0.938	8.53676	-6.76789	0.000142791	0.01116	1.4768
1940402	BASP1	Basp1	0.919	6.91178	6.72027	0.000149937	0.01144	1.42699
520427	PLK1	Plk1	0.685	11.0649	6.73473	0.000147726	0.01144	1.44215
5420309	1200009O22RIK	Tril	-0.755	9.61409	-6.71641	0.000150534	0.01144	1.42294
1230240	IGFBP2	Igfbp2	-0.895	7.56353	-6.72733	0.000148853	0.01144	1.4344
5560400	ISLR	Islr	-1.229	6.36041	-6.71618	0.00015057	0.01144	1.4227
3890328	OAS1G	Oas1g	-1.259	6.44003	-6.72754	0.00014882	0.01144	1.43462
2360519	TEK	Tek	-1.189	6.37761	-6.70599	0.000152156	0.01151	1.412
670500	FIGNL1	Fignl1	0.692	9.03852	6.6868	0.000155198	0.01158	1.3918
3990228	TMEM44	Tmem44	-0.73	6.61145	-6.69532	0.000153838	0.01158	1.40078
4670372	PROS1	Pros1	-0.735	12.1165	-6.68904	0.000154838	0.01158	1.39417
4040674	VSTM2B	Vstm2b	1.42	6.11365	6.67195	0.000157597	0.01171	1.37614
2760465	RRAGB	Rragb	1.165	6.09785	6.6658	0.0001586	0.01171	1.36966
4280086	CMYA5	Cmya5	-0.697	5.57721	-6.66335	0.000159003	0.01171	1.36707
6040242	SEMA3F	Sema3f	-1.196	9.73944	-6.63339	0.000164018	0.01202	1.33535
6330692	GBP6	Gbp6	-1.161	7.00014	-6.62356	0.000165701	0.01209	1.32492
6060026	GPRC5A	Gprc5a	1.214	6.90341	6.58515	0.000172463	0.01232	1.28405
160471	CENTA1	Adap1	0.663	7.56912	6.59633	0.000170464	0.01232	1.29596
150646	2600005C20RIK	Rrp1b	0.634	10.174	6.59596	0.00017053	0.01232	1.29557
1440113	CALCOCO1	Calcoco1	-0.696	6.76352	-6.59048	0.000171508	0.01232	1.28972
2710068	GHR	Ghr	-0.752	7.44897	-6.58507	0.000172478	0.01232	1.28396
3850358	C79407	Mis18bp1	0.811	7.09332	6.56851	0.000175487	0.01248	1.26627
1300377	MAGEH1	Mageh1	0.695	8.39132	6.5461	0.000179653	0.01268	1.24228
2000551	PPAP2B	Ppap2b	-0.883	13.4214	-6.54493	0.000179872	0.01268	1.24103
1410411	LAS1L	Las1l	0.725	7.70561	6.54068	0.000180675	0.01269	1.23647
4260709	GSN	Gsn	-0.888	8.37998	-6.53468	0.000181817	0.01271	1.23003
1980129	LOC236604	NA	0.997	7.50325	6.52299	0.000184063	0.01281	1.21747
3400070	A630095E13RIK	A630095E13Rik	0.796	5.47367	6.50835	0.000186919	0.01281	1.20171
6520133	IRF9	Irf9	-0.66	8.66855	-6.50705	0.000187173	0.01281	1.20032
6250193	TXNIP	Txnip	-0.948	9.95314	-6.50384	0.000187807	0.01281	1.19686
1470138	ZCCHC6	Zcchc6	-0.988	6.62078	-6.51552	0.000185513	0.01281	1.20944
630014	BC037594	Frem1	-1.037	5.40932	-6.50356	0.000187863	0.01281	1.19656
1820341	PDE1A	Pde1a	0.785	6.41609	6.49216	0.000190134	0.01291	1.18426
3060482	IRF9	Irf9	-0.825	10.2915	-6.48367	0.000191843	0.01298	1.1751
6220594	STAT2	Stat2	-0.93	7.65917	-6.47571	0.000193463	0.01303	1.16649
3870072	MMP2	Mmp2	-0.695	13.2338	-6.46447	0.000195774	0.01314	1.15433
3140064	PTPRD	Ptprd	-1.034	6.99532	-6.45929	0.000196849	0.01316	1.14872
1780719	GTSE1	Gtse1	0.717	8.19318	6.44939	0.000198924	0.01321	1.13799
6060356	SLCO3A1	Slco3a1	-0.691	7.52931	-6.44757	0.000199309	0.01321	1.13601
4040475	PRKG2	Prkg2	0.784	11.6965	6.43719	0.000201513	0.01325	1.12474
3610619	NT5E	Nt5e	-0.884	8.01237	-6.43846	0.000201241	0.01325	1.12612
3060400	PRODH	Prodh	0.993	5.4185	6.43264	0.000202489	0.01326	1.11979
5870142	HSP90AA1	Hsp90aa1	0.854	10.2558	6.42903	0.000203266	0.01326	1.11587
5560328	MYD116	Ppp1r15a	-0.629	10.8384	-6.4117	0.000207044	0.01346	1.097
6960397	ITGA11	Itga11	-0.938	10.5532	-6.37937	0.000214301	0.01388	1.06169
6980129	NOL5A	Nop56	0.612	10.7716	6.37495	0.000215315	0.01389	1.05685
2970088	LOC229810	NA	0.651	9.98286	6.36913	0.000216658	0.01392	1.05048
4490239	ZNFX1	Znfx1	-0.649	8.78071	-6.36009	0.000218763	0.014	1.04056
7100301	2810417H13RIK	2810417H13Rik	0.827	7.90893	6.32362	0.000227484	0.01418	1.00047
6110646	CENPI	Cenpi	0.74	8.63128	6.32384	0.000227432	0.01418	1.00071
3170592	NLGN2	Nlgn2	-0.679	10.0513	-6.33831	0.000223925	0.01418	1.01664
450706	BC006779	BC006779	-0.709	8.24585	-6.33173	0.000225513	0.01418	1.0094
1440671	MAPK13	Mapk13	-0.859	8.39399	-6.33549	0.000224606	0.01418	1.01353
10491	E230025L24RIK	NA	-1.18	5.78342	-6.34139	0.000223187	0.01418	1.02003
6330592	DHX58	Dhx58	-1.295	7.22588	-6.32511	0.000227122	0.01418	1.00211
4200017	CISH	Cish	-0.68	9.61503	-6.31333	0.000230016	0.01428	0.989116
5960577	IFITM1	Ifitm1	-0.664	14.0454	-6.30831	0.000231261	0.01431	0.983574
2470730	2810417K24RIK	NA	0.814	8.31205	6.28529	0.000237069	0.01451	0.958123
2190280	C330008K14RIK	Prelid2	0.643	8.33566	6.29003	0.000235858	0.01451	0.963378
1030025	CXCL12	Cxcl12	-0.849	8.25778	-6.28491	0.000237166	0.01451	0.957703
6980397	KIFC1	Kifc1	0.611	9.03455	6.2803	0.000238347	0.01453	0.952605
4280139	DCN	Dcn	-0.922	12.051	-6.27459	0.000239821	0.01457	0.946277
5820537	MFAP2	Mfap2	-0.744	12.2307	-6.26672	0.00024187	0.01464	0.93754
3060458	INHBA	Inhba	0.891	10.8973	6.26053	0.000243495	0.01468	0.930669
1070014	CACNA1G	Cacna1g	-0.859	5.91991	-6.25421	0.000245166	0.01468	0.923648
5560474	RSAD2	Rsad2	-0.964	7.81406	-6.25624	0.000244628	0.01468	0.925902
1580327	SMARCA2	Smarca2	-0.771	6.35722	-6.24338	0.00024806	0.0148	0.911598
450632	IGF1	Igf1	-1.087	8.82301	-6.2352	0.00025027	0.01487	0.902489
630286	ACSL6	Acsl6	0.921	7.64471	6.22035	0.000254336	0.01501	0.885935
7100259	MME	Mme	-1.583	6.42909	-6.2206	0.000254268	0.01501	0.886208
4480735	IL15	Il15	-0.833	5.66063	-6.21308	0.000256353	0.01507	0.87782
7320537	KLRA18	Klra18	1.286	5.7024	6.20069	0.000259835	0.01519	0.86396
5220324	TNFRSF11B	Tnfrsf11b	-0.721	8.89033	-6.19945	0.000260186	0.01519	0.862573
2490253	SOAT2	Soat2	0.678	5.369	6.18014	0.000265722	0.01535	0.840937
830762	EIF2AK2	Eif2ak2	-0.583	11.5179	-6.18083	0.000265521	0.01535	0.841716
3190240	RORA	Rora	-1.01	8.35234	-6.18627	0.00026395	0.01535	0.847815
4640673	C79407	Mis18bp1	0.866	7.03465	6.15041	0.000274502	0.01541	0.807526
60360	BC021395	NA	0.716	6.18907	6.15477	0.000273193	0.01541	0.812438
6330601	IL18BP	Il18bp	0.648	6.24804	6.14843	0.000275096	0.01541	0.805302
6940402	IL15	Il15	-0.598	7.15556	-6.15283	0.000273774	0.01541	0.810254
3190411	ANTXR1	Antxr1	-0.609	8.74496	-6.15087	0.000274363	0.01541	0.808047
6110204	CTSK	Ctsk	-0.683	12.2957	-6.15801	0.000272228	0.01541	0.816077
4250154	ADAMTS12	Adamts12	-0.744	9.14286	-6.1504	0.000274504	0.01541	0.807519
990221	2300002D11RIK	Trnp1	-0.804	7.94002	-6.17308	0.000267778	0.01541	0.833019
3190553	AGTR1A	Agtr1a	-0.888	6.72447	-6.15992	0.000271658	0.01541	0.818232
4490017	TAP2	Tap2	-0.723	10.0626	-6.14379	0.000276499	0.01544	0.800074
6420170	BC006779	BC006779	-0.689	8.35203	-6.12864	0.000281132	0.01565	0.782989
5420021	1810062O18RIK	1810062O18Rik	-0.982	6.56921	-6.11767	0.00028454	0.01578	0.770597
780427	EGLN1	Egln1	0.664	6.54443	6.07473	0.000298328	0.01629	0.721918
1470341	HIST1H2AH	Hist1h2ah	0.658	13.3668	6.0663	0.000301121	0.01629	0.712331
1710070	BOK	Bok	0.61	7.21751	6.06172	0.000302649	0.01629	0.707121
6110037	PLD3	Pld3	-0.626	11.0203	-6.07702	0.000297575	0.01629	0.724518
2710403	ZDHHC20	Zdhhc20	-0.631	5.99788	-6.07099	0.000299562	0.01629	0.717669
510722	TGFBR3	Tgfbr3	-0.71	11.3717	-6.08062	0.000296392	0.01629	0.728617
6130044	PEAR1	Pear1	-0.712	7.53183	-6.06439	0.000301756	0.01629	0.710162
6940156	E130102H24RIK	E130102H24Rik	-0.738	7.61726	-6.06552	0.000301378	0.01629	0.71145
2190128	FAP	Fap	-0.869	5.64109	-6.06892	0.000300249	0.01629	0.715313
4540497	SLC4A3	Slc4a3	-0.924	7.57867	-6.05848	0.000303734	0.01629	0.703437
3170603	E430002G05RIK	Pamr1	-1.409	7.31137	-6.05616	0.000304515	0.01629	0.700795
6130286	DIRAS2	Diras2	0.737	5.62894	6.05077	0.000306339	0.01633	0.694649
6370593	METAP2	Metap2	0.59	7.57622	6.04857	0.000307086	0.01633	0.692141
940546	EPHA2	Epha2	0.792	7.53904	6.03137	0.000312998	0.01659	0.672512
6290390	AURKB	Aurkb	0.711	9.06032	6.0229	0.000315958	0.01669	0.662822
1510132	6030408C04RIK	G2e3	0.665	6.52163	6.01672	0.000318136	0.01675	0.655752
520164	PDLIM2	Pdlim2	-0.624	8.8946	-6.01338	0.00031932	0.01676	0.651927
2570095	PSMB8	Psmb8	-0.775	10.7217	-6.01054	0.000320329	0.01676	0.648676
580364	IGFBP2	Igfbp2	-1.007	7.09663	-6.00029	0.000324005	0.0169	0.636926
3610082	CXCL1	Cxcl1	-0.654	13.2663	-5.99701	0.000325193	0.01691	0.63316
7550463	SLC25A30	Slc25a30	0.602	8.05325	5.99169	0.000327126	0.01696	0.627054
1780450	ADCY4	Adcy4	-0.859	8.1641	-5.98891	0.000328141	0.01696	0.623866
150544	ANKRD1	Ankrd1	0.96	10.5827	5.977	0.000332531	0.01701	0.610178
6940176	NGFB	Ngf	0.939	8.44998	5.97728	0.000332427	0.01701	0.610499
5550671	LY6C1	Ly6c1	0.775	10.3488	5.96799	0.000335896	0.01701	0.599805
7550554	GNL3	Gnl3	0.689	8.05774	5.97093	0.000334793	0.01701	0.603192
5900402	SCL0004166.1_8	NA	0.657	6.79106	5.96716	0.000336209	0.01701	0.598845
5870048	LOC672441	NA	-0.577	5.96716	-5.98184	0.000330741	0.01701	0.615737
7160370	B230342M21RIK	N4bp2l1	-1.05	6.94625	-5.97506	0.000333251	0.01701	0.607948
6510382	1810032O08RIK	1810032O08Rik	0.644	6.29301	5.96338	0.000337633	0.01703	0.594493
6660050	KIF4	Kif4	0.704	9.60295	5.96046	0.000338737	0.01703	0.591127
6130064	CEND1	Cend1	-0.954	5.46491	-5.95653	0.000340229	0.01705	0.5866
5870703	MMP28	Mmp28	0.612	6.63068	5.95229	0.00034185	0.01708	0.581704
5700537	SPCS3	Spcs3	0.625	8.35377	5.94827	0.000343391	0.01711	0.577068
520753	GGT7	Ggt7	-0.909	6.3822	-5.94338	0.000345277	0.01715	0.571424
1940113	PDCD4	Pdcd4	-0.608	10.3425	-5.93875	0.000347076	0.01716	0.566071
10682	MOBKL2C	Mob3c	-0.759	5.47975	-5.93352	0.000349117	0.01716	0.560027
2940047	C630024B01RIK	NA	-0.772	5.75793	-5.93226	0.000349612	0.01716	0.558566
5860243	PLAC8	Plac8	-1.2	9.97308	-5.93443	0.00034876	0.01716	0.561081
3180402	KLRA22	Klra22	1.392	5.69036	5.92658	0.000351851	0.01717	0.551988
6290014	PHLDA2	Phlda2	0.796	8.32595	5.92754	0.000351469	0.01717	0.553107
7320242	LOC668183	NA	0.916	6.33569	5.90387	0.000360951	0.01731	0.525668
3850255	NBL1	Nbl1	-0.606	10.8234	-5.90627	0.000359979	0.01731	0.52845
4890563	SEMA3A	Sema3a	-0.732	9.86357	-5.91184	0.000357729	0.01731	0.534911
6520273	ADAMTS2	Adamts2	-1.033	11.0122	-5.91096	0.000358083	0.01731	0.533892
4070561	OSR2	Osr2	-1.148	11.3585	-5.90758	0.000359447	0.01731	0.529973
2630553	ANGPTL1	Angptl1	-2.031	8.78729	-5.90788	0.000359325	0.01731	0.530325
7150356	HIST2H2AA1	Hist2h2aa1	-0.646	8.41123	-5.89763	0.000363499	0.01733	0.518418
4730367	IFI30	Ifi30	-0.697	8.37304	-5.89927	0.000362827	0.01733	0.520326
4040270	AGRN	Agrn	-0.707	11.4791	-5.89047	0.000366442	0.01742	0.510106
6180544	MMP3	Mmp3	-1.051	14.4952	-5.88521	0.000368623	0.01748	0.503988
3130240	H2-Q5	H2-Q5	-0.666	8.29427	-5.88153	0.000370159	0.0175	0.499698
4220743	MCPH1	Mcph1	0.591	8.30771	5.87849	0.00037143	0.01751	0.496164
770307	GLCE	Glce	-0.564	9.19315	-5.86104	0.00037883	0.01781	0.475822
1470392	LOC100046518	NA	1.066	7.10683	5.85385	0.000381926	0.01785	0.467427
6330546	IRAK1	Irak1	0.825	6.2027	5.85163	0.000382886	0.01785	0.464837
2570544	D230004N01RIK	NA	0.595	7.83404	5.85194	0.000382754	0.01785	0.465195
7040438	LOC384593	NA	0.756	6.73079	5.83175	0.000391618	0.01813	0.441579
2940615	PDLIM4	Pdlim4	0.75	9.55497	5.82874	0.00039296	0.01813	0.438049
2350669	2810046L04RIK	2810046L04Rik	0.62	5.41091	5.82808	0.000393254	0.01813	0.437277
6100286	TMPO	Tmpo	0.593	8.77742	5.83062	0.000392121	0.01813	0.440253
2810450	ANKRD1	Ankrd1	1.269	8.1261	5.82006	0.000396856	0.01819	0.427872
3830328	CDC25C	Cdc25c	0.783	8.12521	5.82019	0.000396795	0.01819	0.42803
6280681	D030034I04RIK	NA	0.595	7.65466	5.81591	0.000398732	0.01823	0.423005
1010131	LOC238943	NA	0.6	10.937	5.78902	0.000411135	0.01864	0.391396
1470725	GPR88	Gpr88	-0.613	5.76142	-5.79255	0.000409481	0.01864	0.395556
4230360	RAB3IL1	Rab3il1	-0.672	7.36723	-5.79016	0.000410601	0.01864	0.392737
3830608	HOXD10	Hoxd10	1.154	6.46172	5.77797	0.000416354	0.01872	0.378376
6450327	2310031L18RIK	Zwilch	0.717	7.56551	5.76926	0.000420515	0.01872	0.368112
6760500	SCL0003955.1_3	NA	0.588	7.44289	5.7748	0.000417863	0.01872	0.374643
3130609	HIST1H2AK	Hist1h2ak	0.544	13.5967	5.76895	0.000420667	0.01872	0.36774
3710402	TPP1	Tpp1	-0.694	9.72542	-5.78078	0.000415019	0.01872	0.381691
7400725	MGP	Mgp	-0.838	12.5755	-5.7691	0.000420593	0.01872	0.367922
7510008	HVCN1	Hvcn1	-1.212	6.80127	-5.77456	0.000417977	0.01872	0.37436
6250767	2310033K02RIK	Fam65c	-1.038	5.93692	-5.76435	0.000422885	0.01872	0.362312
3060450	OAS2	Oas2	-1.07	5.69716	-5.76425	0.000422934	0.01872	0.362193
1050170	CDCA3	Cdca3	0.583	11.0462	5.75858	0.000425688	0.01879	0.355492
4290709	IFI30	Ifi30	-0.542	9.80991	-5.75531	0.000427284	0.01881	0.351628
4860711	FOXG1	Foxg1	0.831	9.76854	5.75193	0.00042894	0.01883	0.347635
3800491	SRR	Srr	-0.698	8.30442	-5.74455	0.000432583	0.01892	0.338903
6250128	ACOT11	Acot11	-0.974	6.09653	-5.74359	0.000433064	0.01892	0.337756
70546	HIST1H2AG	Hist1h2ag	0.687	10.3718	5.73038	0.000439679	0.01896	0.322103
1940768	DDX27	Ddx27	0.612	10.4306	5.7356	0.00043705	0.01896	0.328296
5340224	PRPS1	Prps1	0.6	10.5902	5.73777	0.000435961	0.01896	0.330872
5720397	DHX58	Dhx58	-1.122	7.08704	-5.7334	0.000438155	0.01896	0.325689
7610767	TCEAL5	Tceal5	-1.719	7.35557	-5.73095	0.000439392	0.01896	0.322779
1170553	NUDT11	Nudt11	1.025	7.4333	5.72573	0.000442032	0.01896	0.316591
5860154	LST1	Lst1	-0.761	7.54254	-5.72636	0.000441713	0.01896	0.317338
6980343	LOC668631	NA	0.639	9.10034	5.71309	0.000448501	0.01919	0.301587
2970121	PEAR1	Pear1	-0.692	7.07985	-5.70622	0.000452064	0.01929	0.293416
1690553	1190007F08RIK	1190007F08Rik	-0.696	9.29794	-5.704	0.000453222	0.01929	0.290774
1940255	PLCG2	Plcg2	0.947	7.27408	5.69756	0.000456599	0.01931	0.283106
1780543	KIF2C	Kif2c	0.559	10.0493	5.6943	0.000458318	0.01931	0.279225
990468	ATP8B1	Atp8b1	-0.551	8.72978	-5.69413	0.000458405	0.01931	0.279027
2480296	LOC100048554	NA	-1.05	8.90817	-5.69783	0.000456456	0.01931	0.283429
6200112	CP	Cp	-0.699	7.65085	-5.69174	0.000459673	0.01932	0.276174
1450026	G430008M12RIK	NA	1.058	5.94578	5.67605	0.000468077	0.01948	0.257459
1570754	CDC20	Cdc20	0.604	9.19778	5.68172	0.000465019	0.01948	0.264231
5690019	HBP1	Hbp1	-0.566	11.2696	-5.67744	0.000467326	0.01948	0.259117
5860753	PLEKHA4	Plekha4	-1.067	8.541	-5.67577	0.000468225	0.01948	0.257132
3060307	EG545886	Gm5886	1.64	6.38242	5.671	0.000470818	0.01951	0.251427
7570014	MCM3	Mcm3	0.693	8.72523	5.66314	0.000475116	0.01951	0.242038
4390148	RHOX5	Rhox5	0.608	5.53144	5.65938	0.00047719	0.01951	0.237538
240523	NAGA	Naga	-0.579	6.79527	-5.66999	0.000471366	0.01951	0.250224
540307	IGSF10	Igsf10	-0.651	10.1346	-5.66554	0.000473801	0.01951	0.244902
4590619	LRRN3	Lrrn3	-1.022	7.98373	-5.66012	0.000476779	0.01951	0.238427
5670477	CAR11	Car11	-1.274	7.02159	-5.66078	0.000476416	0.01951	0.239215
3940242	SAMD9L	Samd9l	-0.571	10.7968	-5.64407	0.000485733	0.01976	0.2192
3290411	ACOX2	Acox2	-0.656	5.74751	-5.64494	0.00048524	0.01976	0.220251
2320470	SLC27A6	Slc27a6	-1.194	7.21714	-5.64072	0.000487624	0.01979	0.215187
2450064	PSMB9	Psmb9	-0.931	8.64883	-5.63612	0.000490233	0.01985	0.209672
2760528	1110046J11RIK	Klhl24	-0.639	8.9968	-5.63249	0.000492304	0.01988	0.205313
2680010	3000004C01RIK	Kif18b	0.715	8.61105	5.62629	0.000495861	0.01996	0.197873
5910528	BUB1B	Bub1b	0.606	9.33859	5.62525	0.00049646	0.01996	0.196627
2190139	SRPX2	Srpx2	-1.085	7.6813	-5.62215	0.000498253	0.01998	0.192899
4780193	ASPM	Aspm	0.792	5.95491	5.60896	0.000505962	0.02005	0.17703
1470082	TMEM121	Tmem121	0.777	7.39734	5.60928	0.000505773	0.02005	0.177415
4880575	LOC664956	NA	0.774	6.00664	5.61079	0.000504881	0.02005	0.179239
620209	SNURF	Snurf	0.67	8.25498	5.61313	0.00050351	0.02005	0.182052
5690377	WBSCR27	Wbscr27	-0.748	5.81429	-5.61623	0.000501697	0.02005	0.18578
360373	1810015C04RIK	Fam134b	1.077	7.05035	5.59086	0.000516752	0.02028	0.155215
6130561	PLAU	Plau	-0.746	12.1354	-5.59373	0.000515021	0.02028	0.158684
5310133	TCN2	Tcn2	-0.748	7.98399	-5.59154	0.000516338	0.02028	0.156043
4260528	STAT1	Stat1	-0.921	8.00053	-5.59631	0.000513474	0.02028	0.161793
380463	SDK1	Sdk1	-0.878	8.72445	-5.58701	0.000519079	0.02032	0.15057
1510750	MMP3	Mmp3	-0.933	13.5243	-5.58448	0.000520609	0.02034	0.147526
3120392	STMN1	Stmn1	0.725	6.54366	5.5752	0.000526285	0.02051	0.136315
2650768	GPR137B	Gpr137b	0.737	8.46171	5.56673	0.000531528	0.02058	0.126065
1170300	9030611O19RIK	Fam110c	0.606	8.90995	5.5674	0.00053111	0.02058	0.126877
6200753	SAT2	Sat2	-0.616	7.45627	-5.56647	0.000531691	0.02058	0.125748
1050224	PRKCB	Prkcb	1.219	6.25267	5.56319	0.000533734	0.0206	0.121782
4200707	LOC329750	NA	0.561	11.8058	5.56054	0.000535393	0.0206	0.118572
3780300	TCEA3	Tcea3	-0.853	8.49269	-5.55947	0.000536062	0.0206	0.117281
1740612	IQGAP3	Iqgap3	0.768	5.63441	5.54578	0.000544733	0.02076	0.100686
3460446	NT5DC2	Nt5dc2	0.614	10.9023	5.54492	0.000545283	0.02076	0.0996432
5290736	LOC100042970	NA	0.582	9.63647	5.54266	0.000546732	0.02076	0.096898
6900047	ZFP710	Zfp710	0.526	5.31731	5.54969	0.000542245	0.02076	0.105421
1110494	BC029214	BC029214	-0.52	7.41499	-5.54111	0.000547724	0.02076	0.0950219
4850082	ENPP5	Enpp5	-0.73	10.1918	-5.54719	0.000543834	0.02076	0.102394
670739	HIST1H2AH	Hist1h2ah	0.597	13.2724	5.53529	0.000551479	0.02086	0.0879552
6220270	MCM5	Mcm5	0.519	11.6304	5.52743	0.000556599	0.021	0.0783973
270341	EMB	Emb	-0.596	11.4628	-5.52204	0.00056014	0.021	0.0718371
6480458	TMEM49	Vmp1	-0.656	7.60619	-5.51984	0.000561589	0.021	0.0691651
2120554	D9ERTD392E	Ccpg1	-0.673	11.1646	-5.51864	0.000562385	0.021	0.0676995
2490142	DDX58	Ddx58	-0.985	7.87481	-5.51807	0.000562756	0.021	0.0670171
2360142	ARHGAP20	Arhgap20	-1	6.08274	-5.5188	0.000562278	0.021	0.0678958
3840048	LRRC20	Lrrc20	0.599	6.5665	5.51443	0.000565178	0.02104	0.062574
4570088	CDC20	Cdc20	0.781	10.3809	5.50516	0.000571382	0.02121	0.0512794
130338	WWC1	Wwc1	0.562	7.21289	5.50371	0.000572354	0.02121	0.0495208
1410348	F2RL1	F2rl1	0.987	6.86852	5.49199	0.000580326	0.02137	0.0352095
3180598	RNF167	Rnf167	-0.609	8.29329	-5.4954	0.000577995	0.02137	0.0393737
430300	LOC223653	NA	-0.621	6.37454	-5.49192	0.000580369	0.02137	0.0351335
770193	KLRA20	Klra20	1.29	6.17684	5.48669	0.000583967	0.02145	0.0287379
6100240	GTPBP10	Gtpbp10	0.574	7.51285	5.48471	0.000585332	0.02145	0.0263227
1340209	UCHL5	Uchl5	0.516	10.313	5.47938	0.000589033	0.02154	0.0198005
6370561	EEF1D	Eef1d	0.554	8.81873	5.47564	0.000591643	0.02155	0.015225
2570435	4631426J05RIK	Chst15	-0.67	8.13982	-5.4753	0.000591878	0.02155	0.0148144
20196	DLEU2	Dleu2	-0.781	7.30052	-5.47245	0.000593879	0.02158	0.0113219
630292	SVEP1	Svep1	-1	7.82285	-5.4668	0.000597857	0.02168	0.00441364
10577	MRGPRF	Mrgprf	-0.593	9.09945	-5.46496	0.000599163	0.02168	0.00215488
1090327	H2AFX	H2afx	0.531	10.4452	5.45878	0.000603568	0.02177	-0.00542609
4390228	CDC20	Cdc20	0.524	11.0042	5.45761	0.000604399	0.02177	-0.00684896
4540411	GPR137B	Gpr137b	0.545	8.14983	5.44629	0.000612568	0.02199	-0.0207454
2190064	SPAG5	Spag5	0.535	9.41673	5.44536	0.000613244	0.02199	-0.0218866
6590215	H2-T10	H2-T10	-0.788	8.29994	-5.44124	0.000616247	0.02205	-0.0269429
5870241	TXN1	Txn1	0.556	9.05062	5.43409	0.000621503	0.02211	-0.035733
1940482	HPRT1	Hprt	0.543	11.6555	5.43161	0.000623339	0.02211	-0.038787
6940577	TSPAN6	Tspan6	-0.519	9.97064	-5.43021	0.000624374	0.02211	-0.0405047
7570181	CLEC2D	Clec2d	-0.597	11.3709	-5.434	0.000621573	0.02211	-0.03585
2650092	KLF4	Klf4	-0.703	8.03584	-5.43291	0.000622378	0.02211	-0.037189
6200743	ARSA	Arsa	-0.504	10.7176	-5.42555	0.000627845	0.02214	-0.046243
4560681	EGR4	Egr4	-0.827	7.04691	-5.42536	0.000627989	0.02214	-0.0464802
4040189	EDNRA	Ednra	-0.642	10.8261	-5.42157	0.000630825	0.02219	-0.0511455
380520	AURKA	Aurka	0.548	10.5892	5.41923	0.000632582	0.02221	-0.0540244
5810458	WBSCR17	Wbscr17	-0.796	5.92822	-5.41749	0.000633893	0.02221	-0.0561681
4230446	SFRP2	Sfrp2	-0.797	7.41433	-5.40635	0.000642365	0.02246	-0.0699122
7380673	RRP1B	Rrp1b	0.57	8.77245	5.39844	0.000648448	0.02262	-0.0796709
780221	LOC100044190	NA	-0.638	10.4494	-5.39153	0.000653823	0.02268	-0.0882183
3170689	AXUD1	Csrnp1	-0.643	8.85332	-5.39197	0.000653479	0.02268	-0.0876738
4040435	NDG2	Chchd10	-0.894	9.09212	-5.39122	0.000654065	0.02268	-0.0886015
2450681	TMEM132C	Tmem132c	1.313	6.00688	5.3844	0.000659408	0.02271	-0.0970254
290110	PFKP	Pfkp	0.776	8.90128	5.38579	0.000658317	0.02271	-0.0953106
4120437	2310031L18RIK	Zwilch	0.649	7.25763	5.38014	0.000662774	0.02271	-0.102297
460497	NCL	Ncl	0.556	8.92077	5.384	0.000659726	0.02271	-0.0975251
6940593	8030451K01RIK	Nhlrc3	-0.521	7.46908	-5.37951	0.000663276	0.02271	-0.103081
1780673	ADCY4	Adcy4	-1.057	6.23468	-5.38113	0.000661995	0.02271	-0.101081
7570133	1810031K17RIK	1810031K17Rik	-0.597	6.08963	-5.37676	0.000665463	0.02274	-0.106491
3440100	CDC25A	Cdc25a	0.638	8.18517	5.37343	0.000668114	0.02274	-0.110607
110048	FBN1	Fbn1	-0.587	10.3866	-5.37312	0.000668365	0.02274	-0.110997
4540373	UMPS	Umps	0.533	9.78284	5.36877	0.000671853	0.02282	-0.116387
2810612	BIRC5	Birc5	0.723	10.1672	5.36406	0.000675651	0.0229	-0.122226
1300035	EZH2	Ezh2	0.753	9.95735	5.35701	0.000681382	0.02299	-0.130972
7570204	GSDMDC1	Gsdmd	-0.633	9.24836	-5.35578	0.000682387	0.02299	-0.132498
3440019	EG434078	NA	-0.841	5.96694	-5.35878	0.00067994	0.02299	-0.128778
2450021	SLC29A2	Slc29a2	0.661	6.12978	5.3515	0.0006859	0.02305	-0.137817
870445	LAMC2	Lamc2	0.647	5.62049	5.34356	0.000692467	0.02305	-0.147686
540438	LOC667005	NA	0.637	9.08499	5.34358	0.000692451	0.02305	-0.147662
6060379	CDC2A	Cdk1	0.581	11.0027	5.34477	0.000691463	0.02305	-0.146183
4850133	PPS	Inpp5k	-0.52	10.1489	-5.34605	0.000690397	0.02305	-0.144586
5340692	COL3A1	Col3a1	-0.691	7.51698	-5.34388	0.000692201	0.02305	-0.147288
4570376	BC056923	NA	1.144	5.987	5.31163	0.000719574	0.02322	-0.187462
5720767	4933421E11RIK	4933421E11Rik	1.023	5.80617	5.30333	0.000726812	0.02322	-0.197831
2630402	PROKR2	Prokr2	0.919	8.01061	5.29223	0.000736613	0.02322	-0.21171
1170762	DEK	Dek	0.71	8.66688	5.33551	0.000699197	0.02322	-0.157704
2450474	SCL0001978.1_6	NA	0.628	8.16209	5.30084	0.000728992	0.02322	-0.200934
7150451	LOC637353	NA	0.62	8.72159	5.29783	0.000731648	0.02322	-0.204703
1710368	3000004C01RIK	Kif18b	0.619	7.85075	5.32434	0.000708649	0.02322	-0.171615
10181	TMPO	Tmpo	0.602	9.51669	5.32196	0.000710678	0.02322	-0.174576
2340243	RRM1	Rrm1	0.598	9.45094	5.32491	0.000708162	0.02322	-0.170901
1500491	NUSAP1	Nusap1	0.589	9.76559	5.29639	0.000732916	0.02322	-0.206497
3170669	MCPH1	Mcph1	0.581	6.64163	5.31011	0.000720894	0.02322	-0.189361
1500102	ACSL5	Acsl5	0.534	11.4271	5.29634	0.000732967	0.02322	-0.206568
2000669	PPA1	Ppa1	0.517	12.5882	5.29338	0.000735587	0.02322	-0.210266
3520717	HIST1H2AD	Hist1h2ad	0.515	13.6071	5.30492	0.00072542	0.02322	-0.195845
6350474	SRPX	Srpx	-0.533953	9.48188	-5.31258	0.000718753	0.0232159	-0.18628
4850008	PFKFB2	Pfkfb2	-0.534521	7.46654	-5.30346	0.000726699	0.0232159	-0.19767
3710563	SYTL2	Sytl2	-0.536912	7.97947	-5.31792	0.000714145	0.0232159	-0.179617
6370189	BCKDHA	Bckdha	-0.583224	9.7262	-5.30366	0.000726522	0.0232159	-0.197417
650619	BC031353	BC031353	-0.671012	8.97628	-5.32083	0.000711644	0.0232159	-0.175982
5820192	SCL0003799.1_2	NA	-0.676718	9.63741	-5.30479	0.000725531	0.0232159	-0.196004
5090403	UNC93B1	Unc93b1	-0.679711	6.59935	-5.32762	0.000705856	0.0232159	-0.167523
4070201	VLDLR	Vldlr	-0.682316	10.6377	-5.30337	0.000726778	0.0232159	-0.197783
5900020	PLEKHG5	Plekhg5	-0.682559	5.77047	-5.32166	0.000710933	0.0232159	-0.174947
3610768	NAGLU	Naglu	-0.74571	7.91741	-5.31677	0.000715131	0.0232159	-0.181046
1770292	EGFR	Egfr	-0.753274	6.24393	-5.31174	0.000719476	0.0232159	-0.187322
6760243	CRIM2	Kcp	-0.800813	8.32222	-5.29609	0.000733185	0.0232159	-0.206877
6400719	SAA3	Saa3	-1.27457	7.3179	-5.29424	0.000734823	0.0232159	-0.209188
1690019	MEST	Mest	-1.88889	8.94937	-5.29852	0.000731037	0.0232159	-0.203837
6330678	IRAK1	Irak1	0.525	8.28165	5.29033	0.000738303	0.02323	-0.214084
4220468	HNRNPA2B1	Hnrnpa2b1	0.506	12.0866	5.28715	0.000741141	0.02324	-0.218058
380215	LOC100047963	NA	-0.626319	8.14217	-5.28527	0.000742826	0.0232356	-0.220412
4590102	5730593F17RIK	Fam117a	-0.995705	8.24302	-5.28621	0.000741983	0.0232356	-0.219235
2630408	ADA	Ada	0.818	5.90018	5.2763	0.000750935	0.02343	-0.231662
1410091	CALU	Calu	0.778	7.34547	5.27075	0.000755989	0.02343	-0.238613
630088	NCL	Ncl	0.506	10.0487	5.27474	0.000752352	0.02343	-0.233616
1240682	ZFP521	Zfp521	-0.560007	10.3075	-5.27108	0.000755685	0.0234272	-0.238196
5720484	SLC39A3	Slc39a3	-0.67057	6.13703	-5.27168	0.000755142	0.0234272	-0.237451
510575	PRMT7	Prmt7	0.699	8.54223	5.26913	0.000757478	0.02343	-0.240652
510368	FOS	Fos	-0.691354	13.0185	-5.26749	0.000758978	0.0234326	-0.242701
6940132	A230050P20RIK	A230050P20Rik	-0.568862	10.5557	-5.26348	0.000762678	0.0235032	-0.247741
6370379	HEXA	Hexa	-0.504043	11.178	-5.25874	0.000767066	0.0235615	-0.253687
20088	CXCL12	Cxcl12	-0.732944	7.97338	-5.25838	0.000767402	0.0235615	-0.25414
5260201	TRP53INP1	Trp53inp1	-0.638882	8.7226	-5.24502	0.000779945	0.0238314	-0.270942
290564	CERCAM	Cercam	-0.667045	10.2788	-5.24445	0.000780488	0.0238314	-0.271663
1010327	LOC100047963	NA	-0.760677	8.29465	-5.24562	0.000779379	0.0238314	-0.27019
4490010	MCF2L	Mcf2l	-1.01365	5.82971	-5.23656	0.000787997	0.0240166	-0.281587
4250328	TCF7L2	Tcf7l2	-0.503068	9.03733	-5.23191	0.000792467	0.0241087	-0.287451
3450367	1200015N20RIK	Fam13c	-0.65769	8.52745	-5.22795	0.000796294	0.0241368	-0.292444
5860315	MMP11	Mmp11	-0.666839	7.80897	-5.22849	0.000795767	0.0241368	-0.291757
4200291	RARRES2	Rarres2	-0.588944	6.45202	-5.22253	0.000801565	0.0242525	-0.299282
3780358	MFAP2	Mfap2	-0.914794	10.6898	-5.22079	0.000803265	0.0242598	-0.301477
4210246	KIF22	Kif22	0.535	10.6289	5.21419	0.000809743	0.02437	-0.309803
7050180	SGSM2	Sgsm2	-0.662251	5.62963	-5.21424	0.000809694	0.024367	-0.309741
6560487	SEMA3F	Sema3f	-1.09149	10.2904	-5.2085	0.000815379	0.0244923	-0.316994
7000754	6330403K07RIK	6330403K07Rik	-0.978062	8.11597	-5.20152	0.000822352	0.0246572	-0.325821
1850170	SLC6A15	Slc6a15	0.933	6.73857	5.19985	0.000824029	0.02466	-0.327933
2940681	GATA2	Gata2	0.658	8.6645	5.19163	0.000832344	0.02487	-0.338341
3870070	SEC61A2	Sec61a2	0.498	7.91877	5.18886	0.000835159	0.02491	-0.341842
2450523	9030024J15RIK	Egfr	-0.764707	7.81189	-5.18587	0.000838222	0.0249087	-0.345637
7050047	FCGRT	Fcgrt	-1.03001	9.92146	-5.18692	0.000837145	0.0249087	-0.344303
2450288	LOC100042970	NA	0.723	7.2052	5.18347	0.000840681	0.02494	-0.348673
5720743	6720475J19RIK	6720475J19Rik	1.49	6.49636	5.17929	0.000844988	0.02499	-0.353972
2260471	CRIP2	Crip2	0.692	11.4081	5.17565	0.000848767	0.02499	-0.358598
3120639	PCDHA7	Pcdha7	0.597	7.63057	5.17456	0.0008499	0.02499	-0.359981
4150008	IGF2R	Igf2r	-0.484188	11.1109	-5.17443	0.000850029	0.0249918	-0.360138
2570735	2410006H16RIK	2410006H16Rik	-0.548809	11.2018	-5.1781	0.000846225	0.0249918	-0.355488
2490397	RPS6KB1	Rps6kb1	0.605	6.74664	5.16728	0.00085751	0.02517	-0.369223
2190164	CCNB1	Ccnb1	0.605	10.5312	5.16323	0.00086177	0.02525	-0.374362
4010224	EGFR	Egfr	-0.944465	8.61185	-5.15726	0.000868098	0.0253884	-0.381948
160246	2010204K13RIK	2010204K13Rik	0.863	5.86314	5.14913	0.000876809	0.0256	-0.392301
5290112	RANGAP1	Rangap1	0.659	7.74051	5.14683	0.000879284	0.02561	-0.395224
2650279	LOC547150	NA	0.536	7.81596	5.14572	0.000880483	0.02561	-0.396637
4290424	FOXRED2	Foxred2	-0.72933	5.96619	-5.14463	0.000881664	0.0256052	-0.398026
5720398	HOXD3	Hoxd3	-0.897123	6.13236	-5.13648	0.000890537	0.0258178	-0.40841
2630066	CKAP2	Ckap2	0.715	9.03131	5.13163	0.000895866	0.02588	-0.414597
4640411	PA2G4	Pa2g4	0.572	10.5058	5.12885	0.000898927	0.02588	-0.418134
1450079	USP1	Usp1	0.559	8.6822	5.13251	0.000894889	0.02588	-0.413465
5890056	MAN2B1	Man2b1	-0.663645	11.178	-5.1297	0.000897994	0.0258807	-0.417057
520678	CPSF3	Cpsf3	0.732	5.72427	5.11937	0.000909482	0.02596	-0.43024
3440367	SYT13	Syt13	0.676	6.9135	5.1218	0.00090677	0.02596	-0.427142
2710541	RCL1	Rcl1	0.615	7.04218	5.12072	0.000907969	0.02596	-0.428513
3130554	B430216N15RIK	NA	-0.711534	6.34802	-5.12049	0.000908226	0.02596	-0.428807
3190408	MEST	Mest	-1.7304	7.97676	-5.11958	0.000909249	0.02596	-0.429975
6370270	ABHD4	Abhd4	-0.519929	10.1342	-5.11158	0.000918252	0.0260814	-0.440193
6370142	EG330602	Gm5115	-0.626403	5.75537	-5.11417	0.000915329	0.0260814	-0.436886
2120292	MFAP2	Mfap2	-0.777226	10.4741	-5.11142	0.000918438	0.0260814	-0.440402
6290326	HIST2H2AC	Hist2h2ac	-0.723454	7.61068	-5.10961	0.000920487	0.0260951	-0.442713
4200692	ATAD2	Atad2	0.823	7.37966	5.10231	0.000928818	0.02629	-0.452058
2710324	AARD	Aard	-1.08567	6.38415	-5.10015	0.000931291	0.0263117	-0.454817
1430600	ACOT2	Acot2	-0.684856	6.20585	-5.0984	0.000933311	0.0263241	-0.457063
1230575	PCOLCE2	Pcolce2	0.71	7.09158	5.0893	0.000943862	0.02636	-0.468723
5560646	RRM2	Rrm2	0.531	9.61664	5.0898	0.000943277	0.02636	-0.468079
1190041	FBLN1	Fbln1	-0.505152	9.42841	-5.0923	0.000940367	0.0263561	-0.464875
7650689	E130308J18RIK	NA	-0.678811	5.58086	-5.08922	0.000943949	0.0263561	-0.468819
6840487	NTN2L	Ntn3	-0.728582	8.25557	-5.09006	0.000942976	0.0263561	-0.467749
4590064	HSD17B1	Hsd17b1	-0.76787	6.88346	-5.09516	0.000937056	0.0263561	-0.461217
4040450	AHNAK2	Ahnak2	-0.536696	10.7872	-5.08683	0.000946749	0.02639	-0.471891
2370408	2310061J03RIK	2310061J03Rik	-0.63344	7.78386	-5.08374	0.000950369	0.0264466	-0.475849
6350240	PCNA	Pcna	0.688	6.06024	5.08238	0.000951974	0.02645	-0.477599
460593	BICC1	Bicc1	-0.54609	10.9847	-5.07949	0.000955378	0.0264533	-0.481302
6370025	SLC35B3	Slc35b3	-0.574556	7.80452	-5.08045	0.000954253	0.0264533	-0.480079
3360411	AW049604	NA	0.994	6.66814	5.07617	0.000959311	0.02652	-0.485563
2570372	TUBA1A	Tuba1a	0.559	10.1691	5.07338	0.000962638	0.02652	-0.489154
20075	MFAP4	Mfap4	-0.793751	10.9502	-5.07378	0.000962156	0.0265219	-0.488635
6650414	TUBB1	Tubb1	0.698	5.44358	5.0703	0.000966316	0.02655	-0.49311
6380730	LOC245892	NA	0.486	9.28577	5.06981	0.000966904	0.02655	-0.493741
6510608	STX8	Stx8	-0.688869	7.02872	-5.06237	0.000975851	0.0267531	-0.503295
6550246	A630034E16RIK	NA	0.69	5.60552	5.0594	0.000979458	0.02677	-0.507122
5340348	CRLS1	Crls1	0.567	7.22471	5.05786	0.000981326	0.02677	-0.509099
150240	BICC1	Bicc1	-0.603564	11.9704	-5.0586	0.00098043	0.0267709	-0.508151
4230368	LOC100047579	NA	0.885	5.94176	5.05339	0.000986792	0.02688	-0.514861
1940215	2700046G09RIK	2700046G09Rik	-0.594149	7.01279	-5.05107	0.000989632	0.0269092	-0.517842
2100026	TYMS	Tyms	0.548	10.5258	5.0491	0.000992056	0.02693	-0.52038
730463	ACSL5	Acsl5	0.489	9.42784	5.04662	0.000995119	0.02693	-0.523578
6350189	TREX1	Trex1	-0.513701	8.6602	-5.04721	0.000994385	0.0269265	-0.522813
4640278	CHST7	Chst7	1.317	6.32418	5.03701	0.00100707	0.02698	-0.535959
6270603	1700034H14RIK	1700034H14Rik	1.064	8.27833	5.0392	0.00100434	0.02698	-0.533144
4860050	CYP39A1	Cyp39a1	0.711	5.50729	5.03435	0.00101041	0.02698	-0.539394
7510255	LOC100041681	NA	0.64	5.68945	5.04142	0.00100156	0.02698	-0.530274
3830139	XRCC2	Xrcc2	0.623	6.84166	5.03742	0.00100655	0.02698	-0.53543
3990040	LOC100047155	NA	0.536	10.7972	5.0334	0.00101161	0.02698	-0.540628
510338	1810015A11RIK	Ydjc	0.527	8.54846	5.03646	0.00100776	0.02698	-0.536676
360097	SNORA65	Snora65	0.489	9.24263	5.03848	0.00100523	0.02698	-0.534064
4120014	IFI35	Ifi35	-0.651032	9.02024	-5.0341	0.00101072	0.0269779	-0.539714
3940286	ADAM23	Adam23	-0.815499	10.0318	-5.03139	0.00101413	0.0270018	-0.543211
430564	GSTT1	Gstt1	-0.847484	7.09751	-5.029	0.00101716	0.0270393	-0.546308
5720022	GALM	Galm	-0.585785	8.47597	-5.02748	0.00101909	0.0270472	-0.548269
3180681	LIMS2	Lims2	0.645	6.00086	5.01962	0.00102911	0.02721	-0.558425
3440195	SH3BGRL3	Sh3bgrl3	-0.639784	13.3704	-5.0176	0.00103171	0.0272086	-0.561037
2360592	1700052O22RIK	Man2a2	-0.679674	10.71	-5.01762	0.00103168	0.0272086	-0.561012
1170750	KLF4	Klf4	-0.71539	8.89558	-5.02053	0.00102794	0.0272086	-0.557242
3520114	BRRN1	Ncaph	0.633	9.80084	5.01621	0.00103349	0.02721	-0.56283
1410768	LAMA5	Lama5	0.808	5.62068	5.01309	0.00103752	0.02724	-0.566871
1170431	1700027N10RIK	Rsph9	-0.482054	8.72054	-5.01298	0.00103766	0.0272361	-0.567008
2900661	BC026585	BC026585	-0.549092	5.62677	-5.01011	0.00104137	0.0272681	-0.570714
5390193	CD59B	Cd59b	-0.615064	7.58527	-5.00951	0.00104215	0.0272681	-0.571492
2070161	GEMIN6	Gemin6	0.503	9.02767	5.00641	0.00104619	0.02731	-0.575504
6250131	ZHX1	Zhx1	-0.468473	7.72544	-5.00462	0.00104853	0.0273121	-0.577825
2350131	UGT1A10	Ugt1a10	-0.630819	10.8149	-5.00445	0.00104876	0.0273121	-0.578051
520608	CTSA	Ctsa	-0.468711	10.7777	-5.00093	0.00105338	0.0273592	-0.582604
6020161	TRAF5	Traf5	-0.560261	6.67828	-4.99904	0.00105587	0.0273592	-0.585058
5130138	APPL2	Appl2	-0.576949	9.59435	-4.99807	0.00105714	0.0273592	-0.58631
2570279	IL1RL2	Il1rl2	-0.709154	5.52633	-4.99872	0.00105628	0.0273592	-0.585465
2030131	LOC100043822	NA	-0.461743	8.85247	-4.9919	0.00106532	0.0274853	-0.594305
6100687	ARHGAP20	Arhgap20	-1.11438	6.51034	-4.99202	0.00106517	0.0274853	-0.59416
2000288	GNG8	Gng8	-0.500621	10.1414	-4.98857	0.00106978	0.0275575	-0.598636
7330307	DNM	Dnm1	-0.949887	6.53005	-4.9863	0.00107281	0.0275929	-0.601571
6480044	ARL4C	Arl4c	0.756	9.37796	4.97767	0.00108446	0.02775	-0.612786
4220259	SIAH1B	Siah1b	0.612	6.6909	4.97958	0.00108187	0.02775	-0.610297
4150133	PDGFA	Pdgfa	0.586	9.87564	4.97684	0.00108558	0.02775	-0.613856
4590300	LHX8	Lhx8	-0.569172	7.00785	-4.97807	0.00108392	0.0277499	-0.612266
6760735	LOC665506	LOC665506	1.039	8.70463	4.97311	0.00109067	0.02781	-0.618706
1850246	LUC7L2	Luc7l2	0.788	5.53247	4.97154	0.00109282	0.02781	-0.620746
430025	CCK	Cck	0.631	9.21231	4.97019	0.00109466	0.02781	-0.622499
6450598	D11LGP2E	Dhx58	-0.810179	6.54039	-4.97058	0.00109413	0.0278111	-0.621995
2630189	NET1	Net1	0.581	8.3965	4.96745	0.00109843	0.02786	-0.62606
2000292	PTPN12	Ptpn12	0.78	6.93454	4.96197	0.00110601	0.02796	-0.633199
4250711	HIST1H2AF	Hist1h2af	0.492	13.7091	4.9609	0.00110748	0.02796	-0.634581
580519	MAB21L2	Mab21l2	-0.562108	7.21443	-4.95996	0.00110879	0.0279567	-0.635806
70341	TXNIP	Txnip	-0.756102	10.9715	-4.96298	0.0011046	0.0279567	-0.631877
240433	BDH2	Bdh2	-0.553388	9.04333	-4.95396	0.00111718	0.0281255	-0.643623
5490181	4930547N16RIK	4930547N16Rik	0.616	7.9337	4.95117	0.00112109	0.02814	-0.647253
4290446	2310007F04RIK	Lce3b	-0.626099	5.68903	-4.95226	0.00111957	0.0281389	-0.645845
3610228	CSDA	Csda	0.654	8.81899	4.9493	0.00112374	0.02815	-0.6497
2070253	RANGAP1	Rangap1	0.518	12.5862	4.94856	0.00112477	0.02815	-0.650657
3780736	H2-K1	H2-K1	-0.735853	9.76757	-4.94625	0.00112804	0.0281858	-0.653667
1990500	9930105H17RIK	9930105H17Rik	1.04	8.7685	4.94099	0.00113553	0.02829	-0.66053
3290209	COL7A1	Col7a1	0.616	8.8209	4.94118	0.00113525	0.02829	-0.660281
4220189	APOB48R	Apobr	-0.908015	8.53875	-4.9343	0.00114512	0.0284842	-0.669263
3450300	CLDN1	Cldn1	-0.553215	9.09787	-4.93152	0.00114913	0.0285414	-0.672895
2350259	TMEM25	Tmem25	-0.83131	6.44152	-4.92978	0.00115166	0.0285614	-0.67517
1770168	KIF4	Kif4	0.644	8.14123	4.92634	0.00115665	0.02858	-0.679659
4220326	MCM10	Mcm10	0.517	10.0683	4.92792	0.00115435	0.02858	-0.677596
6860564	CCDC28A	Ccdc28a	-0.511088	6.15425	-4.92565	0.00115766	0.0285825	-0.680565
2000398	HBA-A1	Hba-a1	1.145	5.63055	4.92364	0.00116059	0.02861	-0.683186
870487	A730023M06RIK	Rpap1	0.585	6.01711	4.91766	0.00116937	0.02879	-0.691008
3450600	PLK4	Plk4	0.82	6.92636	4.91642	0.0011712	0.02879	-0.692635
7650240	6720458F09RIK	Trmt61a	0.521	9.7964	4.91269	0.00117672	0.02887	-0.697519
5890477	ADAM33	Adam33	-0.692859	8.34597	-4.91194	0.00117783	0.0288664	-0.698494
3390546	HNRPH1	Hnrnph1	0.7	8.58118	4.90586	0.0011869	0.029	-0.706453
6110671	LOC223672	NA	-0.79305	7.32119	-4.90675	0.00118558	0.0290032	-0.705299
4060626	TNIK	Tnik	-0.481048	8.9329	-4.90356	0.00119035	0.029045	-0.709471
2320730	AMIGO3	Amigo3	-0.785489	6.89052	-4.90158	0.00119333	0.0290751	-0.712066
5820270	SLCO4A1	Slco4a1	1.198	6.99162	4.89676	0.00120063	0.02921	-0.718392
6510184	DYRK3	Dyrk3	0.6	8.57945	4.89313	0.00120615	0.02922	-0.723152
4060398	SFRP1	Sfrp1	-0.914794	11.0508	-4.89307	0.00120624	0.0292184	-0.723229
5310471	CCDC3	Ccdc3	-1.13105	9.90065	-4.89326	0.00120594	0.0292184	-0.722976
7100722	GBA	Gba	-0.482161	11.9433	-4.88754	0.0012147	0.0293806	-0.730488
160392	CXCR4	Cxcr4	0.967	5.62313	4.8859	0.00121723	0.0294	-0.732642
2450528	SAMD10	Samd10	0.673	5.63257	4.88425	0.00121976	0.02942	-0.734799
1260022	CHTF18	Chtf18	0.472	8.82832	4.8765	0.00123179	0.02966	-0.744986
5490278	EBNA1BP2	Ebna1bp2	0.629	11.307	4.86594	0.00124839	0.03002	-0.758884
4120671	HSPD1	Hspd1	0.484	12.535	4.85789	0.00126119	0.0302	-0.769473
3140689	SMARCA1	Smarca1	-0.541271	9.10248	-4.85838	0.00126041	0.0301979	-0.768832
6560497	NNMT	Nnmt	-0.615436	9.17532	-4.85949	0.00125865	0.0301979	-0.767374
2470242	HSD3B7	Hsd3b7	-0.507635	10.8756	-4.85111	0.00127211	0.0303718	-0.778418
4850433	MMP1A	Mmp1a	-0.830526	6.40701	-4.85182	0.00127095	0.0303718	-0.777472
5820609	IRF1	Irf1	-0.662781	8.12915	-4.84948	0.00127474	0.0303909	-0.78056
6350348	4833421E05RIK	Iah1	-0.484858	9.11821	-4.84183	0.0012872	0.0306441	-0.790657
4390129	TGFBR3	Tgfbr3	-0.52291	8.25092	-4.8404	0.00128954	0.0306561	-0.792547
2600019	CLSPN	Clspn	0.535	8.74943	4.83757	0.00129419	0.03072	-0.796283
670754	IGF2R	Igf2r	-0.689647	10.8995	-4.83611	0.0012966	0.030736	-0.798211
10167	EG630499	H2-K2	-0.549479	13.3624	-4.82899	0.0013084	0.0309716	-0.807615
4050762	SERPINB2	Serpinb2	1.191	6.24587	4.82563	0.00131401	0.03097	-0.812056
1400402	PCOLCE2	Pcolce2	0.845	8.72049	4.82582	0.00131368	0.03097	-0.811802
6250019	FREQ	Ncs1	0.627	6.90875	4.82692	0.00131185	0.03097	-0.810352
1450021	ADAMTS10	Adamts10	-0.526224	5.47845	-4.82215	0.00131985	0.0310659	-0.816662
7650068	SERINC2	Serinc2	0.946	6.03384	4.81352	0.00133444	0.03132	-0.828077
5270064	CCDC25	Ccdc25	0.691	5.63158	4.81437	0.001333	0.03132	-0.826959
5670017	DNASE2A	Dnase2a	0.51	6.96416	4.81092	0.00133888	0.03138	-0.831525
2360646	4930579G24RIK	4930579G24Rik	0.523	8.38259	4.809	0.00134216	0.03141	-0.834065
650070	CNRIP1	Cnrip1	-0.713779	9.83402	-4.80573	0.00134778	0.0315006	-0.838404
450372	BOK	Bok	0.596	10.3224	4.80354	0.00135155	0.03154	-0.841303
1430564	2310040A13RIK	Wdr20a	-0.638397	6.59174	-4.80132	0.0013554	0.0315898	-0.844252
2760070	LOC100047645	NA	-0.530529	6.90335	-4.7986	0.0013601	0.031611	-0.847849
4120167	SLCO2A1	Slco2a1	-0.594162	8.21725	-4.79925	0.00135898	0.031611	-0.846995
2810603	HS3ST3B1	Hs3st3b1	-0.998569	6.72993	-4.79717	0.0013626	0.0316249	-0.849756
5690609	RNF144A	Rnf144a	-1.20344	6.46213	-4.79602	0.00136461	0.0316273	-0.851281
3370706	LOC384315	NA	0.577	7.43486	4.79308	0.00136973	0.0317	-0.855176
6770273	CHIC2	Chic2	-0.520144	8.97412	-4.7886	0.0013776	0.0318398	-0.861122
2070019	NCDN	Ncdn	-0.47114	7.08817	-4.78451	0.00138484	0.0319213	-0.866563
2650044	LOC271697	NA	-0.821921	5.90192	-4.78444	0.00138496	0.0319213	-0.866654
6980612	LRRC1	Lrrc1	0.574	7.26126	4.78	0.00139286	0.03201	-0.872555
7100678	D15ERTD528E	Senp1	0.445	6.66004	4.78038	0.00139218	0.03201	-0.872053
5900577	VLDLR	Vldlr	-0.569423	10.9574	-4.77834	0.00139581	0.0320381	-0.874753
4070332	ZC3H15	Zc3h15	0.48	8.9778	4.772	0.00140719	0.03223	-0.883186
4490333	ZFP26	Zfp26	-0.620603	6.26321	-4.77159	0.00140794	0.0322278	-0.88374
4040458	E430024F02RIK	NA	0.696	6.54048	4.76928	0.00141212	0.03228	-0.886816
630634	INCENP	Incenp	0.624	9.16779	4.76525	0.00141943	0.03236	-0.892177
3060274	MEOX2	Meox2	-1.38308	6.83678	-4.76611	0.00141786	0.0323572	-0.891027
7200100	H2-T23	H2-T23	-0.716436	8.86983	-4.76366	0.00142232	0.0323787	-0.894287
2000131	TLR2	Tlr2	-0.752587	8.587	-4.76132	0.0014266	0.0324318	-0.897409
770372	RWDD2B	Rwdd2b	0.506	5.66002	4.75614	0.00143612	0.0326	-0.90431
3180750	DBP	Dbp	-1.09241	9.75623	-4.75486	0.00143849	0.032613	-0.906024
5270504	SLC45A3	Slc45a3	0.574	5.79594	4.75058	0.00144641	0.03266	-0.911721
6760100	4732458O05RIK	NA	-0.435687	10.5559	-4.74992	0.00144765	0.0326597	-0.912612
5270358	LAMP2	Lamp2	-0.49512	12.0227	-4.74866	0.00144998	0.0326597	-0.914282
4480639	VLDLR	Vldlr	-0.663257	10.6943	-4.74752	0.00145211	0.0326597	-0.915811
6840162	2310014F06RIK	2310014F06Rik	-0.693906	6.84345	-4.7474	0.00145233	0.0326597	-0.915964
6620053	CSAD	Csad	-0.740845	8.29721	-4.74893	0.00144949	0.0326597	-0.913931
4610348	6720406L13RIK	Trmt1	0.506	6.97521	4.74177	0.00146289	0.03285	-0.923486
6770551	IFNZ	Ifnz	-0.443224	5.47433	-4.73677	0.00147232	0.03302	-0.930156
6280209	HSPB8	Hspb8	0.646	9.14148	4.73487	0.00147592	0.03306	-0.932693
5820193	D2ERTD750E	D2Ertd750e	0.666	7.70937	4.73353	0.00147849	0.03307	-0.934496
1240427	3000003G13RIK	Ndufaf4	0.553	8.33892	4.72996	0.00148528	0.03318	-0.939257
6420215	GSG2	Gsg2	0.553	8.06173	4.72808	0.00148889	0.03321	-0.941778
5420368	BMI1	Bmi1	0.543	8.08636	4.7239	0.00149693	0.0333	-0.94737
6770553	NIPA1	Nipa1	-0.5435	9.45784	-4.72416	0.00149642	0.0333027	-0.947015
4850754	CALML4	Calml4	-0.550846	7.21618	-4.72284	0.00149897	0.0333036	-0.948785
650168	IVNS1ABP	Ivns1abp	0.613	8.64883	4.71828	0.00150781	0.03339	-0.954886
60647	VBP1	Vbp1	0.546	7.86124	4.71672	0.00151085	0.03339	-0.956975
520750	CPT1C	Cpt1c	-0.708333	6.87255	-4.71745	0.00150943	0.0333891	-0.955999
5720594	CENTD2	Arap1	-0.743759	6.56092	-4.71783	0.00150868	0.0333891	-0.955486
2850470	9030420J04RIK	Arhgap42	0.597	6.22356	4.71368	0.00151678	0.03341	-0.961048
6100092	CPNE8	Cpne8	-0.494146	8.49862	-4.71208	0.00151992	0.0334121	-0.963191
7650020	3110021A11RIK	3110021A11Rik	-0.554025	5.85021	-4.71254	0.00151903	0.0334121	-0.962581
3440538	COMP	Comp	-1.2173	5.66	-4.71358	0.00151698	0.0334121	-0.961183
6480497	ACP2	Acp2	-0.452619	8.80837	-4.70818	0.0015276	0.0335048	-0.968423
1070670	SFRP1	Sfrp1	-0.933027	11.1219	-4.70687	0.00153017	0.0335048	-0.970175
1770086	THSD4	Thsd4	-0.981914	6.64971	-4.70763	0.00152867	0.0335048	-0.969153
2230626	WDR9	Brwd1	-0.552486	7.70552	-4.7045	0.00153487	0.0335635	-0.973357
3930195	AYTL2	Lpcat1	0.774	5.54089	4.69686	0.00155009	0.03358	-0.983597
1340707	UCHL5	Uchl5	0.678	8.66666	4.70136	0.0015411	0.03358	-0.977564
6290064	EG627022	Gm6728	0.664	6.86914	4.69883	0.00154615	0.03358	-0.980958
2450088	MBOAT1	Mboat1	0.537	9.99641	4.70169	0.00154044	0.03358	-0.977118
3830735	TYMS-PS	Tyms-ps	0.466	10.3224	4.69904	0.00154574	0.03358	-0.980681
7650202	CACNA2D1	Cacna2d1	-0.473938	7.40955	-4.69597	0.00155188	0.0335823	-0.984797
380672	TBC1D10C	Tbc1d10c	-0.510094	6.15783	-4.69669	0.00155042	0.0335823	-0.983824
4830685	MCC	Mcc	-0.510168	9.34262	-4.69708	0.00154964	0.0335823	-0.9833
2070148	XRCC1	Xrcc1	0.488	9.15976	4.69261	0.00155863	0.03368	-0.989307
2320678	CDC25C	Cdc25c	0.476	8.28721	4.69081	0.00156227	0.03372	-0.991728
1990270	LOC640739	NA	0.515	10.6031	4.6822	0.00157976	0.03392	-1.00328
6980209	BC024537	NA	0.489	7.79399	4.6844	0.00157528	0.03392	-1.00034
6370364	1810013B01RIK	Abhd14b	-0.499387	7.39131	-4.68221	0.00157974	0.0339209	-1.00327
7150309	COX6B2	Cox6b2	-0.515669	8.22414	-4.68225	0.00157967	0.0339209	-1.00323
5390215	RFESD	Rfesd	-0.470535	7.51146	-4.68018	0.00158389	0.0339293	-1.006
130348	C4A	C4a	-0.769655	5.57399	-4.68002	0.00158422	0.0339293	-1.00621
7400392	SEPW1	Sepw1	-0.46338	10.905	-4.67849	0.00158737	0.0339529	-1.00827
4390241	ANK2	Ank2	-0.496603	6.70535	-4.67002	0.0016049	0.0342838	-1.01968
4200672	MYST4	Myst4	-0.510567	10.2876	-4.66759	0.00160996	0.034348	-1.02295
1570369	BDNF	Bdnf	1.106	6.39643	4.66585	0.0016136	0.03438	-1.02529
6280088	MNS1	Mns1	0.472	8.28851	4.66376	0.00161797	0.03443	-1.0281
5560059	ENTPD6	Entpd6	0.836	5.53673	4.64481	0.00165828	0.03486	-1.05365
3140707	TPX2	Tpx2	0.725	8.03663	4.64446	0.00165904	0.03486	-1.05412
1580307	EXOSC2	Exosc2	0.674	10.1993	4.64439	0.00165919	0.03486	-1.05422
3180204	LOC277856	NA	0.565	11.7642	4.65075	0.00164553	0.03486	-1.04564
840673	LMNB1	Lmnb1	0.558	11.2013	4.64578	0.0016562	0.03486	-1.05235
1260768	LOC381700	NA	0.548	5.45746	4.65146	0.00164402	0.03486	-1.04468
3830564	ATIC	Atic	0.538	8.07858	4.65303	0.00164068	0.03486	-1.04257
1710327	LOC224532	NA	-0.501076	11.2002	-4.64802	0.00165139	0.0348619	-1.04933
1510025	TLE2	Tle2	-0.520712	8.65653	-4.64765	0.00165219	0.0348619	-1.04983
670661	NBL1	Nbl1	-0.746606	7.20431	-4.64791	0.00165162	0.0348619	-1.04947
4610129	HIST1H2AN	Hist1h2an	0.585	12.9623	4.64263	0.001663	0.03487	-1.0566
4390047	EIF4EBP2	Eif4ebp2	0.501	9.73428	4.64223	0.00166387	0.03487	-1.05714
3390273	NDC80	Ndc80	0.585	8.93101	4.63882	0.00167127	0.0349	-1.06175
3190041	CUGBP1	Celf1	0.545	8.92616	4.64032	0.00166801	0.0349	-1.05973
1030010	ENTPD6	Entpd6	0.482	7.14887	4.63861	0.00167171	0.0349	-1.06203
6980164	XRCC2	Xrcc2	0.506	6.42605	4.6315	0.00168726	0.03514	-1.07164
3190575	5530401N12RIK	5530401N12Rik	-0.618803	5.80449	-4.63231	0.00168548	0.0351411	-1.07054
5270382	MCM4	Mcm4	0.752	6.19902	4.62741	0.00169628	0.03524	-1.07717
6770427	COL24A1	Col24a1	-0.600329	7.28651	-4.6281	0.00169476	0.0352406	-1.07624
780475	PRC1	Prc1	0.427672	12.1944	4.62488	0.00170186	0.0353126	-1.08059
6290546	FUSIP1	Srsf10	0.509	6.38642	4.61408	0.00172601	0.03574	-1.09521
6840608	MDM1	Mdm1	0.491	6.04235	4.61377	0.00172671	0.03574	-1.09564
1050400	ESPL1	Espl1	0.692	7.38738	4.60902	0.00173745	0.03589	-1.10207
7050717	LOH11CR2A	Vwa5a	-0.420197	10.7824	-4.6087	0.00173817	0.0358869	-1.1025
4480070	NCAPD2	Ncapd2	0.51	9.14301	4.60618	0.0017439	0.03596	-1.10592
4640692	SFI1	Sfi1	0.575	7.93591	4.60097	0.00175582	0.03616	-1.11299
1770349	ZFP276	Zfp276	0.836	6.27627	4.59972	0.00175867	0.03618	-1.11468
4830201	LOC432730	NA	0.609	6.89577	4.59676	0.0017655	0.03625	-1.1187
3990152	FSD1	Fsd1	-0.489139	7.46887	-4.59635	0.00176643	0.0362457	-1.11925
2470280	B430109P06RIK	NA	0.646	5.56289	4.59341	0.00177325	0.03634	-1.12325
50519	PORCN	Porcn	-0.508539	9.036	-4.58921	0.00178301	0.036461	-1.12895
3130292	IDB2	Id2	-0.704283	9.55306	-4.589	0.0017835	0.036461	-1.12924
6290411	PANK1	Pank1	0.482	8.06432	4.58351	0.00179637	0.03659	-1.1367
5670075	BC013529	BC013529	-0.429775	10.2302	-4.58391	0.00179542	0.0365893	-1.13615
1230543	VAMP4	Vamp4	-0.445368	9.28088	-4.58385	0.00179556	0.0365893	-1.13623
2450500	PLXDC1	Plxdc1	-0.747902	7.98701	-4.57884	0.00180737	0.0367683	-1.14304
160201	4930533K18RIK	4930533K18Rik	-0.549092	10.6308	-4.57785	0.00180973	0.0367714	-1.14439
6100487	LYAR	Lyar	0.568	7.94664	4.56869	0.00183158	0.03712	-1.15685
270379	MCM6	Mcm6	0.488	10.2238	4.569	0.00183085	0.03712	-1.15644
4480364	AEBP1	Aebp1	-0.50173	12.7599	-4.56412	0.00184261	0.0373027	-1.16309
5310682	DDEF2	Asap2	0.767	7.67864	4.55423	0.00186668	0.03738	-1.17656
50500	PRMT7	Prmt7	0.712	6.85874	4.55463	0.00186569	0.03738	-1.17601
3870441	ASH2L	Ash2l	0.472	5.42487	4.55499	0.00186483	0.03738	-1.17553
5090678	SETD1B	Setd1b	-0.448858	9.54188	-4.56033	0.0018518	0.0373807	-1.16825
5360689	HBP1	Hbp1	-0.537959	11.7888	-4.56122	0.00184962	0.0373807	-1.16703
4670463	BCL2L1	Bcl2l1	-0.583092	6.69259	-4.5551	0.00186456	0.0373807	-1.17538
2940487	PPM2C	Pdp1	-0.610798	8.38146	-4.55543	0.00186373	0.0373807	-1.17492
2510747	ARHGAP10	Arhgap10	-0.636721	6.10295	-4.55449	0.00186605	0.0373807	-1.17621
6770356	MEST	Mest	-1.92193	8.37912	-4.55495	0.00186492	0.0373807	-1.17558
1050358	ISL1	Isl1	0.876	6.0068	4.55077	0.00187518	0.03751	-1.18128
870241	2410004L22RIK	Haus8	0.486	8.94315	4.54817	0.0018816	0.03759	-1.18483
290603	HIST2H3C1	Hist2h3c1	-0.649365	6.56435	-4.54578	0.00188752	0.037662	-1.18809
6420551	PARP1	Parp1	0.602	7.11894	4.54317	0.00189401	0.03773	-1.19165
4060441	POLE	Pole	0.471	7.19862	4.5418	0.00189744	0.03773	-1.19353
1510561	1810020D17RIK	1810020D17Rik	-0.490043	9.18183	-4.54175	0.00189755	0.0377265	-1.19359
4250400	UCHL5	Uchl5	0.45	8.75709	4.5401	0.00190168	0.03774	-1.19585
3360368	MKIAA0282	Trim9	-1.48225	7.86571	-4.53959	0.00190294	0.0377436	-1.19654
430152	CHST1	Chst1	0.912	8.89778	4.5361	0.00191172	0.03787	-1.20132
1090142	ANP32A	Anp32a	0.42022	10.6249	4.5258	0.00193782	0.038344	-1.21539
6560743	ARL4C	Arl4c	0.532	8.85835	4.52449	0.00194118	0.03836	-1.21719
7570056	E430003D02RIK	NA	0.931	8.03307	4.51973	0.00195339	0.03856	-1.2237
3800671	SCIN	Scin	-1.18817	8.22361	-4.51818	0.00195739	0.0385935	-1.22583
4490356	ZFP69	Zfp69	0.807	5.67492	4.51221	0.00197286	0.0386	-1.234
3450435	SKP2	Skp2	0.623	5.39204	4.5101	0.00197835	0.0386	-1.23689
3170131	2810410P22RIK	Arl5a	0.55	6.78719	4.51414	0.00196785	0.0386	-1.23136
2470601	WWC2	Wwc2	0.521	9.01229	4.51063	0.00197698	0.0386	-1.23616
130634	DDIT4	Ddit4	0.492	9.16216	4.51364	0.00196915	0.0386	-1.23205
2070747	GNS	Gns	-0.42366	11.3028	-4.51599	0.00196306	0.0385953	-1.22883
5290521	PDGFRA	Pdgfra	-0.462634	12.6969	-4.51687	0.00196076	0.0385953	-1.22761
380717	ZFP703	Zfp703	-0.468002	9.0415	-4.51125	0.00197536	0.0385953	-1.23531
240301	FAS	Fas	-0.595264	6.42576	-4.51254	0.00197199	0.0385953	-1.23354
6590445	RBBP7	Rbbp7	0.487	11.7519	4.50509	0.0019915	0.03881	-1.24376
4010095	LOC100047009	NA	0.775	8.21503	4.50361	0.0019954	0.03884	-1.24579
7040100	SLCO2A1	Slco2a1	-0.563463	9.67881	-4.5017	0.00200043	0.0388892	-1.24841
6840615	1110054H05RIK	Foxk2	0.59	7.57259	4.50004	0.00200482	0.03893	-1.25068
6330672	DLK2	Dlk2	0.815	7.63434	4.49385	0.00202131	0.03916	-1.25919
3830544	SCAPER	Scaper	-0.473833	7.18006	-4.4939	0.00202117	0.0391578	-1.25911
4060767	CD47	Cd47	-0.419432	10.4701	-4.49281	0.00202409	0.0391661	-1.26061
3940129	MELA	Mela	0.891	10.4333	4.48281	0.00205104	0.03924	-1.27435
5700593	SLC7A6	Slc7a6	0.766	6.42177	4.48141	0.00205485	0.03924	-1.27627
730739	CEP78	Cep78	0.606	8.36923	4.48541	0.00204398	0.03924	-1.27077
6100180	UBQLN1	Ubqln1	0.573	8.42574	4.49001	0.00203159	0.03924	-1.26445
7400626	TARSL2	Tarsl2	0.522	6.7378	4.48789	0.0020373	0.03924	-1.26737
3990523	EXOSC2	Exosc2	0.466	7.91664	4.48091	0.00205621	0.03924	-1.27696
1260180	NDE1	Nde1	0.412504	9.63594	4.48481	0.00204562	0.0392402	-1.2716
5820341	NUCB1	Nucb1	-0.41195	12.3964	-4.4855	0.00204375	0.0392402	-1.27065
7160086	EG434402	Gm5617	-0.444602	9.97277	-4.48837	0.002036	0.0392402	-1.2667
290112	HMG20A	Hmg20a	-0.448543	6.61675	-4.48311	0.00205022	0.0392402	-1.27393
5390719	4933439M10RIK	NA	-0.467412	7.62937	-4.48244	0.00205204	0.0392402	-1.27485
5690424	TOX	Tox	-0.662706	6.47059	-4.48189	0.00205354	0.0392402	-1.27561
1240446	BIRC5	Birc5	0.527	11.0468	4.47945	0.00206019	0.03927	-1.27897
5360091	TTLL5	Ttll5	0.862	6.10708	4.47428	0.00207435	0.03931	-1.28608
2340068	MED14	Med14	0.602	8.99557	4.47207	0.00208043	0.03931	-1.28912
5900435	UBE2Q2	Ube2q2	0.547	6.5283	4.47153	0.00208191	0.03931	-1.28985
4220187	RPS6KA4	Rps6ka4	0.474	8.83927	4.47589	0.00206993	0.03931	-1.28386
3830309	EG433923	Gm5560	0.468	12.0152	4.47545	0.00207113	0.03931	-1.28447
110452	LOC671878	NA	0.466	11.6957	4.4738	0.00207567	0.03931	-1.28674
6350563	OLFR1219	Olfr1219	0.443	5.62505	4.46759	0.00209281	0.03931	-1.29528
2100082	1700013A01RIK	Aven	0.424474	9.77122	4.46827	0.00209094	0.0393076	-1.29435
450615	BBC3	Bbc3	-0.474306	9.70687	-4.4688	0.00208946	0.0393076	-1.29361
2470021	PCDH9	Pcdh9	-0.54566	8.34982	-4.47078	0.00208399	0.0393076	-1.29089
160753	STAG3	Stag3	-0.629637	7.91981	-4.47267	0.00207879	0.0393076	-1.2883
4250605	A730040I05RIK	NA	-0.731977	8.4386	-4.46988	0.00208648	0.0393076	-1.29213
5960487	RASSF2	Rassf2	-0.81536	5.71792	-4.47442	0.00207396	0.0393076	-1.28588
7400142	TK1	Tk1	0.583	10.3646	4.46172	0.00210919	0.03946	-1.30337
1090228	5430432M24RIK	Fam110a	0.441	8.68908	4.4613	0.00211036	0.03946	-1.30394
2070152	TIMP2	Timp2	-0.422667	13.1248	-4.46249	0.00210705	0.0394589	-1.30231
5560711	SLC46A3	Slc46a3	-0.782549	5.78015	-4.46344	0.00210438	0.0394589	-1.301
5270768	ELAVL2	Elavl2	1.235	5.68506	4.45893	0.00211701	0.03953	-1.30721
6100646	PHF6	Phf6	0.465	9.41873	4.45826	0.00211889	0.03953	-1.30813
150523	NGFB	Ngf	0.694	9.10297	4.4541	0.00213063	0.03966	-1.31387
1410070	KNTC1	Kntc1	0.475	9.32522	4.45439	0.00212982	0.03966	-1.31347
620372	SPHK1	Sphk1	-0.499352	8.66619	-4.45143	0.00213821	0.0396677	-1.31755
3890678	ANK2	Ank2	-0.532881	7.98883	-4.45158	0.00213779	0.0396677	-1.31735
6380128	HIST1H2BE	Hist1h2be	-0.588863	6.81025	-4.45294	0.00213391	0.0396677	-1.31547
3840082	EG432637	Gm5433	0.729	6.03407	4.45002	0.00214222	0.0397	-1.3195
3180730	ABHD14B	Abhd14b	-0.408785	10.4882	-4.44853	0.00214647	0.0397023	-1.32156
3120341	P2RX4	P2rx4	-0.457411	7.7623	-4.44826	0.00214723	0.0397023	-1.32192
5820598	2610028A01RIK	Pinx1	0.725	7.78466	4.4474	0.0021497	0.0397	-1.32312
3120601	HTATSF1	Htatsf1	0.471	11.1595	4.44618	0.00215318	0.03972	-1.32479
620736	EPHA3	Epha3	-0.652102	8.80724	-4.4451	0.00215628	0.0397372	-1.32629
3140110	LOC100044779	NA	0.528	9.8241	4.44284	0.00216276	0.03977	-1.3294
6860148	MYBBP1A	Mybbp1a	0.494	7.65361	4.44205	0.00216503	0.03977	-1.33049
4010154	H2-T23	H2-T23	-0.662642	9.46661	-4.44201	0.00216516	0.0397686	-1.33055
5490719	DCXR	Dcxr	-0.593139	8.09134	-4.44059	0.00216925	0.0397998	-1.33251
6450634	CDCA8	Cdca8	0.495	11.346	4.43727	0.00217884	0.03988	-1.33709
4480093	LOC225897	NA	-0.427538	9.59815	-4.43782	0.00217726	0.039877	-1.33634
4260292	MR1	Mr1	-0.847222	5.96293	-4.43665	0.00218064	0.039877	-1.33795
4760224	CTGF	Ctgf	1.193	9.59414	4.43026	0.00219927	0.04013	-1.34678
2900138	KIF20B	Kif20b	0.5	8.2192	4.43088	0.00219745	0.04013	-1.34592
1580309	HAP1	Hap1	-0.948016	6.15148	-4.42462	0.00221587	0.040388	-1.35459
3310437	PKP4	Pkp4	0.56	9.63773	4.42155	0.00222495	0.04051	-1.35883
7400300	LBCL1	Arhgef2	-0.494742	8.12054	-4.42077	0.00222725	0.0405068	-1.35991
770451	RASGRF1	Rasgrf1	0.965	8.95964	4.41601	0.00224144	0.04063	-1.3665
3190669	LOC383897	NA	0.564	9.99597	4.41625	0.00224072	0.04063	-1.36616
3360553	CCRN4L	Ccrn4l	0.497	6.30208	4.41758	0.00223676	0.04063	-1.36433
1990019	LLGL2	Llgl2	0.546	7.27405	4.41399	0.0022475	0.04066	-1.3693
1110367	2310037I24RIK	2310037I24Rik	0.461	8.73676	4.41275	0.00225122	0.04066	-1.37101
2690253	ANGPTL6	Angptl6	-0.481514	7.58248	-4.4126	0.00225166	0.0406592	-1.37122
380438	TSHZ3	Tshz3	-0.536371	9.86164	-4.41224	0.00225274	0.0406592	-1.37171
2750326	EGLN3	Egln3	1.334	8.02979	4.40953	0.00226091	0.04072	-1.37547
4290128	TRIM34	Trim34a	-0.714036	5.96263	-4.40989	0.00225982	0.0407185	-1.37497
770474	STX4A	Stx4a	-0.440837	9.53504	-4.40537	0.0022735	0.040883	-1.38124
1470091	SORT1	Sort1	-0.621998	8.75729	-4.40489	0.00227496	0.040883	-1.3819
6620184	SPC25	Spc25	0.508	8.34757	4.40161	0.00228496	0.04102	-1.38645
2970519	ACTL6A	Actl6a	0.523	9.05606	4.40042	0.00228859	0.04104	-1.3881
5130612	SFRS2	Srsf2	0.403386	13.2003	4.39671	0.00229997	0.0411546	-1.39325
4490452	AIFM2	Aifm2	-0.516165	9.57428	-4.39719	0.00229848	0.0411546	-1.39258
1780524	TFRC	Tfrc	0.529	10.3907	4.39193	0.00231471	0.04133	-1.39988
3930176	DBF4	Dbf4	0.44	10.5358	4.39217	0.00231396	0.04133	-1.39954
3450154	CRLS1	Crls1	0.63	6.78528	4.38953	0.00232215	0.04142	-1.40321
6100685	TPRGL	Tprgl	-0.402588	10.7781	-4.38877	0.00232451	0.0414155	-1.40427
7320202	PTGIR	Ptgir	-0.448357	6.97215	-4.3877	0.00232784	0.0414306	-1.40576
10402	TRIM25	Trim25	-0.52841	10.3883	-4.38667	0.00233106	0.0414437	-1.40719
1940598	MMP16	Mmp16	-0.601547	6.31409	-4.38248	0.00234416	0.041632	-1.41301
7380026	DYNC2H1	Dync2h1	-0.429875	7.47816	-4.38046	0.00235051	0.0417003	-1.41581
1710221	RABGGTB	Rabggtb	0.486	8.21354	4.37773	0.00235912	0.04181	-1.41961
4590730	CDC14B	Cdc14b	0.623	6.85347	4.37246	0.00237584	0.04186	-1.42694
160487	LOC381105	NA	0.528	5.98506	4.37389	0.00237128	0.04186	-1.42494
6290544	TEAD4	Tead4	0.477	7.89996	4.37551	0.00236615	0.04186	-1.42269
450131	2210015D19RIK	2210015D19Rik	-0.522085	7.61894	-4.37212	0.00237692	0.0418565	-1.42741
4260239	STXBP5	Stxbp5	-0.567871	5.47735	-4.37239	0.00237606	0.0418565	-1.42703
1980138	MDK	Mdk	-0.675456	10.0084	-4.3751	0.00236745	0.0418565	-1.42327
[truncated: 199 more rows]

## Sheet: Table S3 - Tumours
Table S3
MSigDB C2 Curated Gene Sets	NGenes	Correlation	Down	Up	TwoSided	FDR	Direction
MCMURRAY_TP53_HRAS_COOPERATION_RESPONSE_DN	71	0.0059227	0.999779	0.00022085	0.0004417	0.721517	Up
DOANE_BREAST_CANCER_ESR1_DN	45	0.0122226	0.999639	0.00036099	0.000721979	0.786235	Up
KEGG_TAURINE_AND_HYPOTAURINE_METABOLISM	10	0.0287259	0.999292	0.000708082	0.00141616	0.882307	Up
SMID_BREAST_CANCER_RELAPSE_IN_LUNG_UP	22	0.0256584	0.998894	0.00110571	0.00221141	0.882307	Up
WONG_ENDOMETRIAL_CANCER_LATE	4	-0.0478197	0.998505	0.00149508	0.00299017	0.882307	Up
GAUSSMANN_MLL_AF4_FUSION_TARGETS_E_DN	32	0.0411401	0.998135	0.00186542	0.00373084	0.882307	Up
KEGG_BETA_ALANINE_METABOLISM	19	-0.00666722	0.997828	0.0021724	0.00434481	0.882307	Up
MARTIN_INTERACT_WITH_HDAC	12	-0.00555713	0.997538	0.00246218	0.00492436	0.882307	Up	Martin et al, Oncogene, 2007
CHIANG_LIVER_CANCER_SUBCLASS_INTERFERON_DN	29	0.00822617	0.997095	0.00290531	0.00581061	0.882307	Up
DAZARD_UV_RESPONSE_CLUSTER_G3	15	0.0122747	0.996529	0.00347139	0.00694278	0.882307	Up
ZAIDI_OSTEOBLAST_TRANSCRIPTION_FACTORS	5	-0.0086391	0.996133	0.0038675	0.007735	0.882307	Up
NEBEN_AML_WITH_FLT3_OR_NRAS_UP	11	-0.0162593	0.995538	0.00446173	0.00892346	0.882307	Up
RODRIGUES_NTN1_TARGETS_DN	199	0.00528129	0.994919	0.00508146	0.0101629	0.882307	Up
LE_SKI_TARGETS_DN	5	-0.0288189	0.994817	0.00518301	0.010366	0.882307	Up
NAKAMURA_METASTASIS	54	0.014521	0.994714	0.00528626	0.0105725	0.882307	Up
TIAN_TNF_SIGNALING_NOT_VIA_NFKB	16	-0.0371595	0.994571	0.00542879	0.0108576	0.882307	Up
REN_ALVEOLAR_RHABDOMYOSARCOMA_UP	122	0.0826054	0.99397	0.00603003	0.0120601	0.882307	Up
GESERICK_TERT_TARGETS_DN	25	0.00225129	0.993582	0.00641787	0.0128357	0.882307	Up
BIOCARTA_CACAM_PATHWAY	23	-0.0178735	0.993455	0.00654498	0.01309	0.882307	Up
YU_MYC_TARGETS_DN	56	0.0388368	0.993362	0.00663797	0.0132759	0.882307	Up	Yu et al, Ann N Y Acad Sci, 2005
TESAR_ALK_TARGETS_HUMAN_ES_5D_UP	3	0.551409	0.993115	0.00688536	0.0137707	0.882307	Up
REACTOME_IONOTROPIC_ACTIVITY_OF_KAINATE_RECEPTORS	9	-0.0373021	0.992917	0.00708306	0.0141661	0.882307	Up
KUNINGER_IGF1_VS_PDGFB_TARGETS_UP	44	0.0976423	0.992546	0.00745387	0.0149077	0.882307	Up
KEGG_PROXIMAL_TUBULE_BICARBONATE_RECLAMATION	17	0.0592907	0.992147	0.00785282	0.0157056	0.882307	Up
HANN_RESISTANCE_TO_BCL2_INHIBITOR_DN	33	0.0303007	0.991879	0.00812132	0.0162426	0.882307	Up
KANG_FLUOROURACIL_RESISTANCE_DN	19	-0.0062328	0.991734	0.00826574	0.0165315	0.882307	Up
LOPEZ_EPITHELIOID_MESOTHELIOMA	15	0.0659776	0.991727	0.00827342	0.0165468	0.882307	Up
BIOCARTA_NEUROTRANSMITTERS_PATHWAY	6	0.208439	0.991206	0.00879425	0.0175885	0.882307	Up
GAUSSMANN_MLL_AF4_FUSION_TARGETS_D_UP	27	0.0865097	0.991169	0.00883076	0.0176615	0.882307	Up
RICKMAN_HEAD_AND_NECK_CANCER_F	45	0.126778	0.990787	0.00921315	0.0184263	0.882307	Up
HOFMANN_MYELODYSPLASTIC_SYNDROM_LOW_RISK_UP	34	-0.00990885	0.990685	0.00931503	0.0186301	0.882307	Up
BRUNEAU_HEART_GREAT_VESSELS_AND_VALVULOGENESIS	7	0.140972	0.990438	0.00956161	0.0191232	0.882307	Up
HU_ANGIOGENESIS_UP	32	0.0303644	0.989534	0.0104661	0.0209322	0.882307	Up
HEIDENBLAD_AMPLICON_8Q24_DN	50	-0.00280206	0.988956	0.011044	0.022088	0.882307	Up
SAKAI_TUMOR_INFILTRATING_MONOCYTES_UP	31	-0.00919719	0.988432	0.0115685	0.0231369	0.882307	Up
REACTOME_MYOGENESSIS	47	0.0135162	0.987294	0.012706	0.025412	0.882307	Up
BROWNE_HCMV_INFECTION_12HR_UP	135	0.00685678	0.986344	0.0136556	0.0273113	0.882307	Up
REACTOME_DEPOLARIZATION_OF_THE_PRESYNAPTIC_TERMINAL_TRIGGERS_THE_OPENING_OF_CALCIUM_CHANNELS	14	0.013872	0.986271	0.013729	0.0274581	0.882307	Up
DAVICIONI_TARGETS_OF_PAX_FOXO1_FUSIONS_DN	84	0.0383674	0.986149	0.0138508	0.0277016	0.882307	Up
LAIHO_COLORECTAL_CANCER_SERRATED_DN	102	0.0123177	0.986077	0.0139227	0.0278454	0.882307	Up
REACTOME_XENOBIOTICS	3	0.0445307	0.985839	0.0141612	0.0283223	0.882307	Up
DAVICIONI_PAX_FOXO1_SIGNATURE_IN_ARMS_DN	27	0.0643244	0.984893	0.0151072	0.0302144	0.882307	Up
IGARASHI_ATF4_TARGETS_UP	5	0.165016	0.984684	0.0153161	0.0306323	0.882307	Up
REACTOME_NUCLEAR_RECEPTOR_TRANSCRIPTION_PATHWAY	42	0.041574	0.983852	0.0161478	0.0322955	0.882307	Up
TRAYNOR_RETT_SYNDROM_DN	8	0.228067	0.983551	0.0164491	0.0328982	0.882307	Up
REACTOME_CREB_PHOSPHORYLATION_THROUGH_THE_ACTIVATION_OF_CAMKII	22	-0.0293358	0.982563	0.0174373	0.0348746	0.882307	Up
BEIER_GLIOMA_STEM_CELL_UP	34	0.0144238	0.9825	0.0175001	0.0350003	0.882307	Up
HO_LIVER_CANCER_VASCULAR_INVASION	16	0.0252726	0.981927	0.0180734	0.0361468	0.882307	Up
TURASHVILI_BREAST_CARCINOMA_DUCTAL_VS_LOBULAR_DN	4	-0.157152	0.981912	0.0180884	0.0361768	0.882307	Up
YAMASHITA_LIVER_CANCER_WITH_EPCAM_DN	9	0.0566363	0.981117	0.0188828	0.0377656	0.882307	Up
CHESLER_BRAIN_D6MIT150_QTL_TRANS	13	0.12227	0.980997	0.0190029	0.0380058	0.882307	Up
CAIRO_HEPATOBLASTOMA_POOR_SURVIVAL	13	-0.0378297	0.980751	0.0192491	0.0384982	0.882307	Up
CHEBOTAEV_GR_TARGETS_DN	142	-0.000290042	0.97981	0.0201896	0.0403792	0.882307	Up
ZHAN_MULTIPLE_MYELOMA_CD1_VS_CD2_DN	53	0.0120553	0.979484	0.0205163	0.0410326	0.882307	Up
SMID_BREAST_CANCER_LUMINAL_B_UP	134	0.0214739	0.978676	0.0213241	0.0426482	0.882307	Up
YAO_TEMPORAL_RESPONSE_TO_PROGESTERONE_CLUSTER_6	72	0.00699125	0.978611	0.0213894	0.0427788	0.882307	Up
RODRIGUES_NTN1_AND_DCC_TARGETS	37	0.00844796	0.978541	0.0214593	0.0429185	0.882307	Up
LEE_NEURAL_CREST_STEM_CELL_UP	155	0.00202396	0.977757	0.0222435	0.0444869	0.882307	Up
FOURNIER_ACINAR_DEVELOPMENT_EARLY_DN	13	0.00179779	0.977601	0.0223994	0.0447988	0.882307	Up
PALOMERO_GSI_SENSITIVITY_UP	13	-0.0230348	0.976985	0.023015	0.0460301	0.882307	Up
FONTAINE_FOLLICULAR_THYROID_ADENOMA_UP	65	0.00399958	0.976714	0.0232864	0.0465727	0.882307	Up
VALK_AML_CLUSTER_10	37	0.00223293	0.976333	0.0236666	0.0473332	0.882307	Up
KEGG_GLYCEROPHOSPHOLIPID_METABOLISM	100	0.00896531	0.975998	0.0240015	0.048003	0.882307	Up
ZHANG_RESPONSE_TO_IKK_INHIBITOR_AND_TNF_DN	128	0.0196723	0.975955	0.0240452	0.0480904	0.882307	Up
BROWNE_HCMV_INFECTION_20HR_UP	294	0.00789294	0.975706	0.0242938	0.0485875	0.882307	Up
HOFFMANN_LARGE_TO_SMALL_PRE_BII_LYMPHOCYTE_DN	43	-0.00540026	0.973133	0.0268667	0.0537335	0.882307	Up
WATANABE_COLON_CANCER_MSI_VS_MSS_UP	35	0.0297209	0.972437	0.0275626	0.0551252	0.882307	Up
REACTOME_STRIATED_MUSCLE_CONTRACTION	32	0.155953	0.972396	0.0276038	0.0552076	0.882307	Up
CHIARETTI_ACUTE_LYMPHOBLASTIC_LEUKEMIA_ZAP70	82	0.00479053	0.972314	0.0276859	0.0553719	0.882307	Up
SILIGAN_BOUND_BY_EWS_FLT1_FUSION	40	0.0498009	0.970713	0.0292872	0.0585743	0.882307	Up
HADDAD_B_LYMPHOCYTE_PROGENITOR	316	0.000911073	0.970438	0.0295619	0.0591239	0.882307	Up
RUGO_STRESS_RESPONSE_SUBSET_F	10	0.139637	0.968453	0.0315471	0.0630941	0.882307	Up
KYNG_DNA_DAMAGE_BY_4NQO_OR_GAMMA_RADIATION	10	0.139637	0.968453	0.0315471	0.0630941	0.882307	Up
KEGG_ABC_TRANSPORTERS	34	0.17803	0.968255	0.0317454	0.0634907	0.882307	Up
CHIANG_LIVER_CANCER_SUBCLASS_UNANNOTATED_UP	15	-0.00902527	0.967957	0.0320432	0.0640864	0.882307	Up
SCHURINGA_STAT5A_TARGETS_UP	13	0.00210413	0.967838	0.0321619	0.0643238	0.882307	Up
VERRECCHIA_RESPONSE_TO_TGFB1_C6	13	0.1987	0.9677	0.0323004	0.0646007	0.882307	Up
MCCLUNG_DELTA_FOSB_TARGETS_2WK	54	-0.000245114	0.96757	0.0324298	0.0648597	0.882307	Up
GINESTIER_BREAST_CANCER_20Q13_AMPLIFICATION_DN	233	0.0406174	0.967374	0.0326256	0.0652511	0.882307	Up
DAVICIONI_RHABDOMYOSARCOMA_PAX_FOXO1_FUSION_DN	19	0.0249603	0.965704	0.0342957	0.0685915	0.882307	Up
HOEBEKE_LYMPHOID_STEM_CELL_UP	117	0.0113398	0.964941	0.0350594	0.0701189	0.882307	Up
WANG_ESOPHAGUS_CANCER_PROGRESSION_UP	6	0.0535588	0.964189	0.0358111	0.0716222	0.882307	Up
KONDO_HYPOXIA	4	0.317379	0.963689	0.0363107	0.0726214	0.882307	Up
NGUYEN_NOTCH1_TARGETS_UP	29	0.0772343	0.963651	0.036349	0.072698	0.882307	Up
NIKOLSKY_BREAST_CANCER_19Q13.1_AMPLICON	10	0.261244	0.962001	0.0379992	0.0759984	0.882307	Up
LU_AGING_BRAIN_UP	228	0.000472978	0.961968	0.0380318	0.0760636	0.882307	Up
WANG_CLIM2_TARGETS_UP	266	0.0180137	0.961888	0.0381118	0.0762236	0.882307	Up
NIKOLSKY_BREAST_CANCER_12Q24_AMPLICON	24	0.0660553	0.961146	0.0388545	0.0777089	0.882307	Up
LOPES_METHYLATED_IN_COLON_CANCER_UP	21	0.0126653	0.95891	0.0410904	0.0821808	0.882307	Up
CAMPS_COLON_CANCER_COPY_NUMBER_UP	83	0.00370868	0.958235	0.0417653	0.0835305	0.882307	Up
NAGASHIMA_NRG1_SIGNALING_UP	225	0.0135575	0.956442	0.0435578	0.0871156	0.882307	Up
BIOCARTA_CBL_PATHWAY	24	0.0488277	0.956095	0.0439048	0.0878096	0.882307	Up
BIOCARTA_EGFR_SMRTE_PATHWAY	13	0.0121152	0.956094	0.0439058	0.0878115	0.882307	Up
HATADA_METHYLATED_IN_LUNG_CANCER_DN	17	0.100181	0.955982	0.044018	0.088036	0.882307	Up
VALK_AML_CLUSTER_7	25	0.0534247	0.95519	0.0448099	0.0896197	0.882307	Up
EHRLICH_ICF_SYNDROM_UP	19	-0.000244541	0.953905	0.0460951	0.0921901	0.882307	Up
BENPORATH_PRC2_TARGETS	398	0.0147021	0.95386	0.0461399	0.0922797	0.882307	Up	Ben-Porath et al, Nat Genet, 2008
ELVIDGE_HIF1A_TARGETS_DN	124	0.0662148	0.953522	0.0464784	0.0929568	0.882307	Up
WEBER_METHYLATED_HCP_IN_FIBROBLAST_DN	16	-0.016302	0.953244	0.0467558	0.0935116	0.882307	Up
RIZ_ERYTHROID_DIFFERENTIATION_12HR	46	0.00802801	0.952921	0.0470788	0.0941576	0.882307	Up
KEGG_LYSINE_DEGRADATION	64	0.0344046	0.951395	0.0486047	0.0972094	0.882307	Up
NIKOLSKY_BREAST_CANCER_22Q13_AMPLICON	18	0.0547586	0.951172	0.0488275	0.097655	0.882307	Up
BUCKANOVICH_T_LYMPHOCYTE_HOMING_ON_TUMOR_UP	10	-0.0718953	0.950903	0.049097	0.0981941	0.882307	Up
AMIT_EGF_RESPONSE_120_HELA	88	0.0134788	0.950409	0.0495909	0.0991819	0.882307	Up
KOMMAGANI_TP63_GAMMA_TARGETS	14	0.15305	0.950084	0.0499156	0.0998312	0.882307	Up
REACTOME_RAS_ACTIVATION_UOPN_CA2+_INFUX_THROUGH_NMDA_RECEPTOR	29	-0.0136521	0.950047	0.0499531	0.0999061	0.882307	Up
GINESTIER_BREAST_CANCER_ZNF217_AMPLIFIED_DN	419	0.0910926	0.950039	0.0499606	0.0999213	0.882307	Up
BIOCARTA_SET_PATHWAY	14	-0.00350082	0.000199417	0.999801	0.000398834	0.721517	Down
BOYAULT_LIVER_CANCER_SUBCLASS_G56_UP	13	0.0289978	0.00114371	0.998856	0.00228742	0.882307	Down
REACTOME_APOPTOTIC_EXECUTION_PHASE	73	0.00393201	0.00117211	0.998828	0.00234421	0.882307	Down
BIOCARTA_ASBCELL_PATHWAY	9	0.0663801	0.00224774	0.997752	0.00449547	0.882307	Down
MARKS_HDAC_TARGETS_UP	30	0.0120898	0.00369378	0.996306	0.00738756	0.882307	Down
BIOCARTA_DC_PATHWAY	16	0.0354847	0.00396577	0.996034	0.00793154	0.882307	Down
BIOCARTA_BCELLSURVIVAL_PATHWAY	24	0.0119623	0.00445515	0.995545	0.00891029	0.882307	Down
BHATI_G2M_ARREST_BY_2METHOXYESTRADIOL_UP	136	0.0116091	0.00491337	0.995087	0.00982674	0.882307	Down
REACTOME_GENES_INVOLVED_IN_APOPTOTIC_CLEAVAGE_OF_CELLULAR_PROTEINS	63	0.000739837	0.00497901	0.995021	0.00995801	0.882307	Down
BIOCARTA_NFAT_PATHWAY	69	0.00377724	0.00511963	0.99488	0.0102393	0.882307	Down
NAKAMURA_ALVEOLAR_EPITHELIUM	7	-0.00849634	0.00540437	0.994596	0.0108087	0.882307	Down
TCGA_GLIOBLASTOMA_COPY_NUMBER_DN	29	-0.00279315	0.00598957	0.99401	0.0119791	0.882307	Down
BIOCARTA_D4GDI_PATHWAY	20	-0.00662159	0.00605147	0.993949	0.0121029	0.882307	Down
LOPEZ_MESOTELIOMA_SURVIVAL_TIME_UP	28	0.0287092	0.00611581	0.993884	0.0122316	0.882307	Down
BIOCARTA_NGF_PATHWAY	26	0.0142092	0.00626893	0.993731	0.0125379	0.882307	Down
OLSSON_E2F3_TARGETS_DN	32	0.00676968	0.00666218	0.993338	0.0133244	0.882307	Down
VALK_AML_CLUSTER_3	34	0.00189598	0.00694571	0.993054	0.0138914	0.882307	Down
DER_IFN_BETA_RESPONSE_UP	123	0.000571137	0.00703957	0.99296	0.0140791	0.882307	Down
MYLLYKANGAS_AMPLIFICATION_HOT_SPOT_9	7	0.00252108	0.00707337	0.992927	0.0141467	0.882307	Down
WAESCH_ANAPHASE_PROMOTING_COMPLEX	12	-0.0140908	0.00713122	0.992869	0.0142624	0.882307	Down
BIOCARTA_CSK_PATHWAY	18	0.0160126	0.00713575	0.992864	0.0142715	0.882307	Down
KIM_MYCL1_AMPLIFICATION_TARGETS_DN	18	0.0254602	0.0075052	0.992495	0.0150104	0.882307	Down
AMUNDSON_POOR_SURVIVAL_AFTER_GAMMA_RADIATION_2G	220	0.00796383	0.00792088	0.992079	0.0158418	0.882307	Down
HUMMEL_BURKITTS_LYMPHOMA_UP	54	0.0235236	0.00800413	0.991996	0.0160083	0.882307	Down
BIOCARTA_STEM_PATHWAY	4	-0.130507	0.00802401	0.991976	0.016048	0.882307	Down
BIOCARTA_TH1TH2_PATHWAY	17	0.0586535	0.00841013	0.99159	0.0168203	0.882307	Down
REACTOME_APOPTOSIS	199	0.0280792	0.00843364	0.991566	0.0168673	0.882307	Down
YAO_TEMPORAL_RESPONSE_TO_PROGESTERONE_CLUSTER_9	75	0.0398246	0.00860303	0.991397	0.0172061	0.882307	Down
YANG_BREAST_CANCER_ESR1_BULK_UP	16	-0.00996057	0.00867055	0.991329	0.0173411	0.882307	Down
NIKOLSKY_BREAST_CANCER_5P15_AMPLICON	20	0.0761677	0.00920929	0.990791	0.0184186	0.882307	Down
BIOCARTA_CERAMIDE_PATHWAY	44	0.00492355	0.00933155	0.990668	0.0186631	0.882307	Down
FERRANDO_LYL1_NEIGHBORS	16	0.0420224	0.0094028	0.990597	0.0188056	0.882307	Down
PELLICCIOTTA_HDAC_IN_ANTIGEN_PRESENTATION_DN	59	0.0529924	0.00963598	0.990364	0.019272	0.882307	Down
BIOCARTA_BLYMPHOCYTE_PATHWAY	12	0.255054	0.0096363	0.990364	0.0192726	0.882307	Down
CHEMNITZ_RESPONSE_TO_PROSTAGLANDIN_E2_UP	179	0.0188428	0.00994228	0.990058	0.0198846	0.882307	Down
BIOCARTA_PTEN_PATHWAY	24	0.0245498	0.0102099	0.98979	0.0204198	0.882307	Down
SANA_RESPONSE_TO_IFNG_UP	63	0.055537	0.011209	0.988791	0.0224181	0.882307	Down
LEE_LIVER_CANCER_MYC_UP	59	0.0109086	0.0118455	0.988155	0.023691	0.882307	Down
DACOSTA_ERCC3_ALLELE_XPCS_VS_TTD_DN	34	0.0269178	0.0120281	0.987972	0.0240562	0.882307	Down
CHESLER_BRAIN_HIGHEST_GENETIC_VARIANCE	37	-0.0044298	0.0120444	0.987956	0.0240888	0.882307	Down
MILI_PSEUDOPODIA	59	-0.00479804	0.0121364	0.987864	0.0242727	0.882307	Down
BIOCARTA_ERK5_PATHWAY	27	0.0535928	0.012147	0.987853	0.024294	0.882307	Down
GRAHAM_CML_DIVIDING_VS_NORMAL_QUIESCENT_UP	220	0.0413957	0.0126466	0.987353	0.0252932	0.882307	Down
BIOCARTA_INFLAM_PATHWAY	17	-0.00239296	0.0131903	0.98681	0.0263805	0.882307	Down
MUELLER_X_LINKED_COPY_NUMBER_DN	4	0.0663986	0.0134605	0.98654	0.0269209	0.882307	Down
KEGG_GLYCOSPHINGOLIPID_BIOSYNTHESIS_GLOBO_SERIES	12	0.096581	0.013641	0.986359	0.027282	0.882307	Down
POOLA_INVASIVE_BREAST_CANCER_UP	302	0.0345579	0.0139144	0.986086	0.0278287	0.882307	Down
HOFMANN_MYELODYSPLASTIC_SYNDROM_RISK_DN	18	0.0140093	0.0140542	0.985946	0.0281084	0.882307	Down
RAY_ALZHEIMERS_DISEASE	5	0.163299	0.014113	0.985887	0.0282259	0.882307	Down
DITTMER_PTHLH_TARGETS_UP	166	0.019514	0.0151109	0.984889	0.0302217	0.882307	Down
KORKOLA_CHORIOCARCINOMA	1	NA	0.0154116	0.984588	0.0308232	0.882307	Down
CHIARETTI_T_ALL_RELAPSE_PROGNOSIS	20	0.0166761	0.015483	0.984517	0.0309659	0.882307	Down
SEMBA_FHIT_TARGETS_DN	16	0.0811541	0.0158336	0.984166	0.0316673	0.882307	Down
ACEVEDO_LIVER_CANCER_UP	1180	0.0146336	0.0160954	0.983905	0.0321909	0.882307	Down
XU_RESPONSE_TO_TRETINOIN_UP	15	0.00323174	0.0163148	0.983685	0.0326295	0.882307	Down
NAKAMURA_TUMOR_ZONE_PERIPHERAL_VS_CENTRAL_UP	371	0.0136683	0.0167327	0.983267	0.0334654	0.882307	Down
GRAHAM_CML_QUIESCENT_VS_NORMAL_QUIESCENT_UP	98	0.025661	0.0172437	0.982756	0.0344875	0.882307	Down
BIOCARTA_IGF1_PATHWAY	35	0.0138922	0.0173358	0.982664	0.0346717	0.882307	Down
BIOCARTA_BAD_PATHWAY	36	0.0633556	0.0177376	0.982262	0.0354752	0.882307	Down
MARZEC_IL2_SIGNALING_DN	53	0.0233969	0.0180504	0.98195	0.0361008	0.882307	Down
KEGG_ASTHMA	21	0.18595	0.0182977	0.981702	0.0365954	0.882307	Down
REACTOME_SYNTHESIS_AND_INTERCONVERSION_OF_NUCLEOTIDE_DI_AND_TRIPHOSPHATES	31	0.0617847	0.018556	0.981444	0.0371121	0.882307	Down
KEGG_GLUTATHIONE_METABOLISM	57	0.0386135	0.0186769	0.981323	0.0373539	0.882307	Down
REACTOME_SMOOTH_MUSCLE_CONTRACTION	41	0.0359362	0.0187244	0.981276	0.0374488	0.882307	Down
BIOCARTA_IGF1R_PATHWAY	31	0.0248117	0.0187983	0.981202	0.0375966	0.882307	Down
REACTOME_TIE2_SIGNALING	25	0.0138186	0.019061	0.980939	0.038122	0.882307	Down
MORI_LARGE_PRE_BII_LYMPHOCYTE_UP	78	0.051839	0.0191697	0.98083	0.0383394	0.882307	Down
BIOCARTA_ERYTH_PATHWAY	10	0.0520018	0.0192063	0.980794	0.0384126	0.882307	Down
ZHAN_MULTIPLE_MYELOMA_LB_DN	52	0.00845866	0.0192924	0.980708	0.0385848	0.882307	Down
YAO_TEMPORAL_RESPONSE_TO_PROGESTERONE_CLUSTER_15	44	-0.00310989	0.0194485	0.980552	0.038897	0.882307	Down
RUGO_STRESS_RESPONSE_SUBSET_H	63	-0.000960767	0.0195113	0.980489	0.0390226	0.882307	Down
KYNG_DNA_DAMAGE_BY_GAMMA_AND_UV_RADIATION	63	-0.000960767	0.0195113	0.980489	0.0390226	0.882307	Down
XU_HGF_TARGETS_INDUCED_BY_AKT1_48HR_UP	14	0.0573182	0.0196509	0.980349	0.0393017	0.882307	Down
REACTOME_SEMA4D_IN_SEMAPHORIN_SIGNALING	33	0.0419671	0.0199831	0.980017	0.0399663	0.882307	Down
KRISHNAN_FURIN_TARGETS_UP	11	0.0372778	0.0201494	0.979851	0.0402988	0.882307	Down
MAYBURD_RESPONSE_TO_L663536_DN	71	-0.00209565	0.0202029	0.979797	0.0404058	0.882307	Down
JEON_SMAD6_TARGETS_UP	28	0.0425199	0.0203226	0.979677	0.0406453	0.882307	Down
GUTIERREZ_CHRONIC_LYMPHOCYTIC_LEUKEMIA_UP	10	-0.0335307	0.0203919	0.979608	0.0407837	0.882307	Down
BROWNE_INTERFERON_RESPONSIVE_GENES	77	0.0822605	0.0205604	0.97944	0.0411208	0.882307	Down
REACTOME_CLASS_C3_METABOTROPIC_GLUTAMATE_PHEROMONE_RECEPTORS	5	-0.0397871	0.0212509	0.978749	0.0425018	0.882307	Down
REACTOME_CELL_SURFACE_INTERACTIONS_AT_THE_VASCULAR_WALL	113	0.0256654	0.0217221	0.978278	0.0434442	0.882307	Down
HENDRICKS_SMARCA4_TARGETS_DN	44	0.0186337	0.0218957	0.978104	0.0437913	0.882307	Down
SATO_SILENCED_EPIGENETICALLY_IN_PANCREATIC_CANCER	29	0.0181297	0.0219237	0.978076	0.0438473	0.882307	Down
CHIARETTI_T_ALL_REFRACTORY_TO_THERAPY	38	0.0053754	0.0220904	0.97791	0.0441807	0.882307	Down
NAKAMURA_LUNG_CANCER	9	-0.0036707	0.0222596	0.97774	0.0445191	0.882307	Down
NAKAMURA_LUNG_CANCER_MARKERS	9	-0.0036707	0.0222596	0.97774	0.0445191	0.882307	Down
IVANOVA_HEMATOPOIESIS_INTERMEDIATE_PROGENITOR	56	0.0350577	0.0223568	0.977643	0.0447137	0.882307	Down
KENNY_CTNNB1_TARGETS_DN	58	0.0192867	0.0226115	0.977389	0.045223	0.882307	Down
REACTOME_APOPTOSIS_INDUCED_DNA_FRAGMENTATION	10	0.0393038	0.0230979	0.976902	0.0461957	0.882307	Down
BIOCARTA_AHSP_PATHWAY	10	0.0173507	0.0232337	0.976766	0.0464673	0.882307	Down
SA_FAS_SIGNALING	12	0.0474795	0.0232347	0.976765	0.0464693	0.882307	Down
RUGO_RESPONSE_TO_4NQO	26	0.00469271	0.0233244	0.976676	0.0466489	0.882307	Down
KYNG_DNA_DAMAGE_BY_4NQO	26	0.00469271	0.0233244	0.976676	0.0466489	0.882307	Down
GRUETZMANN_PANCREATIC_CANCER_UP	480	0.0185896	0.0233547	0.976645	0.0467095	0.882307	Down
KEGG_AUTOIMMUNE_THYROID_DISEASE	28	0.246161	0.0233723	0.976628	0.0467446	0.882307	Down
CHANG_CYCLING_GENES	67	0.0653288	0.0235659	0.976434	0.0471318	0.882307	Down
TURASHVILI_BREAST_LOBULAR_CARCINOMA_VS_DUCTAL_NORMAL_UP	96	0.0392133	0.023802	0.976198	0.047604	0.882307	Down
LASTOWSKA_NEUROBLASTOMA_COPY_NUMBER_DN	975	0.00532794	0.0238274	0.976173	0.0476549	0.882307	Down
SCIAN_CELL_CYCLE_TARGETS_OF_TP53_AND_TP73_DN	38	0.0860597	0.0241007	0.975899	0.0482013	0.882307	Down
KUMAMOTO_RESPONSE_TO_NUTLIN_3A_DN	14	0.121095	0.0242428	0.975757	0.0484857	0.882307	Down
KALMA_E2F1_TARGETS	25	0.0404452	0.0242978	0.975702	0.0485955	0.882307	Down
WEI_MIR34A_TARGETS	198	0.00587167	0.0246408	0.975359	0.0492816	0.882307	Down
REACTOME_CDC20_PHOSPHO_APC_MEDIATED_DEGRADATION_OF_CYCLIN_A	88	0.0778595	0.0250017	0.974998	0.0500034	0.882307	Down
DER_IFN_GAMMA_RESPONSE_UP	91	0.00420149	0.0252155	0.974785	0.050431	0.882307	Down
ICHIBA_GRAFT_VERSUS_HOST_DISEASE_D7_UP	116	0.058864	0.0255652	0.974435	0.0511304	0.882307	Down
HAHTOLA_SEZARY_SYNDROM_UP	110	0.027938	0.0257836	0.974216	0.0515672	0.882307	Down
MILI_PSEUDOPODIA_CHEMOTAXIS_UP	89	0.0172543	0.0257901	0.97421	0.0515802	0.882307	Down
REACTOME_SEMA4D_INDUCED_CELL_MIGRATION_AND_GROWTH_CONE_COLLAPSE	29	0.0517822	0.0262079	0.973792	0.0524159	0.882307	Down
IIZUKA_LIVER_CANCER_PROGRESSION_G2_G3_DN	10	0.0254197	0.0265582	0.973442	0.0531163	0.882307	Down
MONTERO_THYROID_CANCER_POOR_SURVIVAL_UP	13	0.138424	0.0267562	0.973244	0.0535123	0.882307	Down
BACOLOD_RESISTANCE_TO_ALKYLATING_AGENTS_UP	33	0.051767	0.0268822	0.973118	0.0537643	0.882307	Down
RHODES_UNDIFFERENTIATED_CANCER	88	0.0665593	0.027146	0.972854	0.054292	0.882307	Down
BIDUS_METASTASIS_DN	200	0.032724	0.02774	0.97226	0.05548	0.882307	Down
GRAHAM_NORMAL_QUIESCENT_VS_NORMAL_DIVIDING_DN	106	0.0966974	0.0285203	0.97148	0.0570407	0.882307	Down
FUNG_IL2_TARGETS_WITH_STAT5_BINDING_SITES_T1	7	0.0422479	0.0285383	0.971462	0.0570766	0.882307	Down
PIEPOLI_LGI1_TARGETS_UP	13	0.0882196	0.0286338	0.971366	0.0572677	0.882307	Down
FERRANDO_TAL1_NEIGHBORS	16	0.0191132	0.0288326	0.971167	0.0576652	0.882307	Down
REACTOME_CELL_CYCLE_CHECKPOINTS	170	0.0468578	0.028941	0.971059	0.057882	0.882307	Down
REACTOME_BRANCHED_CHAIN_AMINO_ACID_CATABOLISM	17	0.0406541	0.0290034	0.970997	0.0580068	0.882307	Down
NADERI_BREAST_CANCER_PROGNOSIS_DN	27	0.0627621	0.029078	0.970922	0.0581559	0.882307	Down
MORI_IMMATURE_B_LYMPHOCYTE_DN	72	0.060343	0.0291864	0.970814	0.0583728	0.882307	Down
SIG_BCR_SIGNALING_PATHWAY	60	0.0328268	0.0292227	0.970777	0.0584455	0.882307	Down
LIANG_HEMATOPOIESIS_STEM_CELL_NUMBER_LARGE_VS_TINY_UP	46	-0.00317387	0.0293081	0.970692	0.0586162	0.882307	Down
CHEOK_RESPONSE_TO_MERCAPTOPURINE_DN	24	0.0016131	0.0293119	0.970688	0.0586239	0.882307	Down
WILLIAMS_ESR2_TARGETS_UP	23	0.00450219	0.0294066	0.970593	0.0588132	0.882307	Down
NIELSEN_SCHWANNOMA_DN	3	0.0157871	0.030051	0.969949	0.0601019	0.882307	Down
GOLDRATH_ANTIGEN_RESPONSE	419	0.0373284	0.0303067	0.969693	0.0606135	0.882307	Down
AMUNDSON_POOR_SURVIVAL_AFTER_GAMMA_RADIATION_8G	138	0.0193399	0.0304128	0.969587	0.0608255	0.882307	Down
BUYTAERT_PHOTODYNAMIC_THERAPY_STRESS_DN	808	0.0135497	0.0308939	0.969106	0.0617878	0.882307	Down
BIOCARTA_CASPASE_PATHWAY	42	0.00722071	0.0315118	0.968488	0.0630235	0.882307	Down
TESAR_ALK_TARGETS_HUMAN_ES_4D_DN	2	-0.47992	0.031548	0.968452	0.0630959	0.882307	Down
SANA_TNF_SIGNALING_UP	85	0.0379218	0.0316669	0.968333	0.0633337	0.882307	Down
BIOCARTA_DNAFRAGMENT_PATHWAY	10	-0.0687686	0.0317909	0.968209	0.0635818	0.882307	Down
ZHAN_MULTIPLE_MYELOMA_HP_DN	58	0.0559216	0.0318567	0.968143	0.0637134	0.882307	Down
BIOCARTA_SODD_PATHWAY	16	0.0686987	0.0323431	0.967657	0.0646861	0.882307	Down
REACTOME_STEROID_METABOLISM	53	0.0733045	0.03263	0.96737	0.0652599	0.882307	Down
REACTOME_UNWINDING_OF_DNA	15	0.408384	0.0327898	0.96721	0.0655796	0.882307	Down
LOPEZ_MESOTHELIOMA_SURVIVAL_OVERALL_UP	6	0.0193175	0.0328019	0.967198	0.0656038	0.882307	Down
DER_IFN_ALPHA_RESPONSE_DN	6	0.0847253	0.0330316	0.966968	0.0660632	0.882307	Down
KEGG_ALLOGRAFT_REJECTION	30	0.264065	0.0332516	0.966748	0.0665031	0.882307	Down
ALONSO_METASTASIS_EMT_UP	43	0.0559198	0.033328	0.966672	0.0666559	0.882307	Down
BIOCARTA_GLEEVEC_PATHWAY	35	0.0253251	0.0335503	0.96645	0.0671007	0.882307	Down
NING_CHRONIC_OBSTRUCTIVE_PULMONARY_DISEASE_DN	85	0.0371657	0.0337544	0.966246	0.0675089	0.882307	Down
REACTOME_CASPASE_MEDIATED_CLEAVAGE_OF_CYTOSKELETAL_PROTEINS	25	0.0206557	0.0338279	0.966172	0.0676559	0.882307	Down
REACTOME_POST_CHAPERONIN_TUBULIN_FOLDING_PATHWAY	21	0.0115651	0.0340034	0.965997	0.0680067	0.882307	Down
GAL_LEUKEMIC_STEM_CELL_DN	273	0.0179357	0.0345285	0.965472	0.069057	0.882307	Down
LIANG_HEMATOPOIESIS_STEM_CELL_NUMBER_SMALL_VS_HUGE_DN	41	-0.000828746	0.0350592	0.964941	0.0701184	0.882307	Down
REACTOME_STABILIZATION_OF_P53	72	0.0799459	0.0351021	0.964898	0.0702042	0.882307	Down
LINDSTEDT_DENDRITIC_CELL_MATURATION_D	74	0.0445605	0.0354333	0.964567	0.0708666	0.882307	Down
KIM_RESPONSE_TO_TSA_AND_DECITABINE_DN	13	0.132619	0.0354992	0.964501	0.0709983	0.882307	Down
IVANOVA_HEMATOPOIESIS_LATE_PROGENITOR	154	0.0454835	0.0358088	0.964191	0.0716176	0.882307	Down
SMITH_TERT_TARGETS_DN	88	0.0334517	0.0359168	0.964083	0.0718337	0.882307	Down
SANA_RESPONSE_TO_IFNG_DN	112	0.0249405	0.0360997	0.9639	0.0721994	0.882307	Down
NAGY_PCAF_COMPONENTS_HUMAN	9	0.16546	0.0362776	0.963722	0.0725552	0.882307	Down
HORIUCHI_WTAP_TARGETS_DN	396	0.0287779	0.0363422	0.963658	0.0726845	0.882307	Down
TAKADA_GASTRIC_CANCER_COPY_NUMBER_UP	10	-0.014336	0.0368372	0.963163	0.0736744	0.882307	Down
REACTOME_INACTIVATION_OF_APC_VIA_DIRECT_INHIBITION_OF_THE_APCOMPLEX	24	0.0160516	0.0371555	0.962844	0.0743111	0.882307	Down
LINDGREN_BLADDER_CANCER_CLUSTER_3_UP	406	0.0271168	0.0372382	0.962762	0.0744763	0.882307	Down
KOKKINAKIS_METHIONINE_DEPRIVATION_48HR_UP	165	0.00566443	0.0372445	0.962756	0.0744889	0.882307	Down
YAGUE_PRETUMOR_DRUG_RESISTANCE_DN	14	0.11522	0.0376536	0.962346	0.0753072	0.882307	Down
FUJII_YBX1_TARGETS_DN	215	0.0393995	0.0378779	0.962122	0.0757558	0.882307	Down
LOPEZ_MESOTHELIOMA_SURVIVAL_WORST_VS_BEST_DN	6	0.210448	0.0379059	0.962094	0.0758117	0.882307	Down
GOLDRATH_HOMEOSTATIC_PROLIFERATION	206	0.0450089	0.0379568	0.962043	0.0759135	0.882307	Down
VALK_AML_CLUSTER_5	42	0.180848	0.0379851	0.962015	0.0759702	0.882307	Down
BIOCARTA_LYM_PATHWAY	11	0.12161	0.0380193	0.961981	0.0760385	0.882307	Down
REACTOME_DNA_STRAND_ELONGATION	46	0.0973092	0.0383031	0.961697	0.0766061	0.882307	Down
REACTOME_P53_INDEPENDENT_DNA_DAMAGE_RESPONSE	64	0.123854	0.0384592	0.961541	0.0769183	0.882307	Down
WIELAND_UP_BY_HBV_INFECTION	101	0.139656	0.0386695	0.961331	0.077339	0.882307	Down
DER_IFN_ALPHA_RESPONSE_UP	88	0.0143405	0.0386909	0.961309	0.0773818	0.882307	Down
BIOCARTA_PROTEASOME_PATHWAY	25	0.137612	0.0390657	0.960934	0.0781314	0.882307	Down
PENG_RAPAMYCIN_RESPONSE_UP	51	0.00581029	0.0393414	0.960659	0.0786828	0.882307	Down
TAKAYAMA_BOUND_BY_AR	8	-0.036795	0.0394223	0.960578	0.0788446	0.882307	Down
TESAR_ALK_TARGETS_HUMAN_ES_5D_DN	3	-0.216092	0.0397471	0.960253	0.0794941	0.882307	Down
BIOCARTA_FIBRINOLYSIS_PATHWAY	7	0.0422768	0.0399692	0.960031	0.0799384	0.882307	Down
CROONQUIST_IL6_DEPRIVATION_UP	19	0.112801	0.0401178	0.959882	0.0802357	0.882307	Down
WELCSH_BRCA1_TARGETS_1_UP	260	0.0305722	0.0407432	0.959257	0.0814864	0.882307	Down
BIOCARTA_NKCELLS_PATHWAY	20	0.101069	0.0410295	0.958971	0.0820589	0.882307	Down
KEGG_VIRAL_MYOCARDITIS	76	0.0416482	0.0412332	0.958767	0.0824665	0.882307	Down
YU_MYC_TARGETS_UP	52	0.0392237	0.0414425	0.958557	0.0828851	0.882307	Down
CROONQUIST_NRAS_VS_STROMAL_STIMULATION_DN	110	0.0201336	0.0414945	0.958505	0.0829891	0.882307	Down
REACTOME_PYRIMIDINE_METABOLISM	36	0.10628	0.0415721	0.958428	0.0831441	0.882307	Down
KEGG_PORPHYRIN_AND_CHLOROPHYLL_METABOLISM	36	0.0246412	0.0418658	0.958134	0.0837316	0.882307	Down
CROMER_METASTASIS_UP	83	0.00803014	0.042024	0.957976	0.084048	0.882307	Down
FERRANDO_T_ALL_WITH_MLL_ENL_FUSION_DN	107	0.0253317	0.0421367	0.957863	0.0842734	0.882307	Down
SESTO_RESPONSE_TO_UV_C7	89	0.0366272	0.0421386	0.957861	0.0842771	0.882307	Down
REACTOME_APCDC20_MEDIATED_DEGRADATION_OF_CYCLIN_B	22	0.0204071	0.0423669	0.957633	0.0847339	0.882307	Down
TANG_SENESCENCE_TP53_TARGETS_DN	52	0.0514292	0.0425764	0.957424	0.0851529	0.882307	Down
KEGG_INTESTINAL_IMMUNE_NETWORK_FOR_IGA_PRODUCTION	40	0.12893	0.0426968	0.957303	0.0853936	0.882307	Down
ICHIBA_GRAFT_VERSUS_HOST_DISEASE_35D_UP	138	0.0873725	0.0428032	0.957197	0.0856064	0.882307	Down
REACTOME_AUTODEGRADATION_OF_CDH1_BY_CDH1_APC	78	0.0800493	0.0428152	0.957185	0.0856304	0.882307	Down
BIOCARTA_GRANULOCYTES_PATHWAY	13	0.181138	0.0428644	0.957136	0.0857288	0.882307	Down
BIOCARTA_HER2_PATHWAY	35	0.0177067	0.043003	0.956997	0.0860061	0.882307	Down
REACTOME_SIGNALLING_TO_P38_VIA_RIT_AND_RIN	25	0.0148311	0.0433296	0.95667	0.0866592	0.882307	Down
LY_AGING_MIDDLE_DN	25	0.070295	0.043352	0.956648	0.086704	0.882307	Down
SCHUETZ_BREAST_CANCER_DUCTAL_INVASIVE_UP	457	0.0523315	0.0437026	0.956297	0.0874052	0.882307	Down
LY_AGING_MIDDLE_UP	11	0.212155	0.043948	0.956052	0.0878961	0.882307	Down
IIZUKA_LIVER_CANCER_PROGRESSION_L0_L1_DN	16	0.0764583	0.0440934	0.955907	0.0881869	0.882307	Down
REACTOME_SCF_BETA_TRCP_MEDIATED_DEGRADATION_OF_EMI1	73	0.10481	0.0446164	0.955384	0.0892328	0.882307	Down
HOFFMANN_LARGE_TO_SMALL_PRE_BII_LYMPHOCYTE_UP	130	0.0364758	0.0448163	0.955184	0.0896326	0.882307	Down
WATANABE_COLON_CANCER_MSI_VS_MSS_DN	64	0.00212784	0.0448206	0.955179	0.0896411	0.882307	Down
ZHAN_MULTIPLE_MYELOMA_PR_UP	53	0.0625482	0.0450181	0.954982	0.0900362	0.882307	Down
CAIRO_LIVER_DEVELOPMENT_DN	218	0.0132835	0.0450208	0.954979	0.0900416	0.882307	Down
KEGG_PENTOSE_AND_GLUCURONATE_INTERCONVERSIONS	14	0.17837	0.0450553	0.954945	0.0901105	0.882307	Down
HELLER_SILENCED_BY_METHYLATION_UP	253	0.0142696	0.0451304	0.95487	0.0902608	0.882307	Down
ACEVEDO_LIVER_TUMOR_VS_NORMAL_ADJACENT_TISSUE_UP	1066	0.0287697	0.0453018	0.954698	0.0906036	0.882307	Down
STEIN_ESR1_TARGETS	98	0.0285568	0.0453794	0.954621	0.0907589	0.882307	Down
REACTOME_HORMONE_BIOSYNTHESIS	32	0.0899963	0.0456406	0.954359	0.0912812	0.882307	Down
BIOCARTA_DEATH_PATHWAY	58	0.00832626	0.0456842	0.954316	0.0913684	0.882307	Down
NAGY_STAGA_COMPONENTS_HUMAN	14	0.00516957	0.046189	0.953811	0.092378	0.882307	Down
FAELT_B_CLL_WITH_VH3_21_DN	64	0.032949	0.0469511	0.953049	0.0939022	0.882307	Down
LE_EGR2_TARGETS_UP	150	0.0348218	0.0470207	0.952979	0.0940415	0.882307	Down
RUGO_RESPONSE_TO_GAMMA_RADIATION	60	0.00476006	0.0470391	0.952961	0.0940782	0.882307	Down
KYNG_DNA_DAMAGE_BY_GAMMA_RADIATION	60	0.00476006	0.0470391	0.952961	0.0940782	0.882307	Down
REACTOME_REGULATION_OF_ORNITHINE_DECARBOXYLASE	65	0.129749	0.0470462	0.952954	0.0940923	0.882307	Down
KEGG_APOPTOSIS	132	0.0372487	0.0472352	0.952765	0.0944704	0.882307	Down
KEGG_VALINE_LEUCINE_AND_ISOLEUCINE_DEGRADATION	47	0.0570444	0.0472585	0.952742	0.0945169	0.882307	Down
SASAKI_ADULT_T_CELL_LEUKEMIA	187	0.00257239	0.0481703	0.95183	0.0963406	0.882307	Down
BORCZUK_MALIGNANT_MESOTHELIOMA_UP	445	0.0409228	0.0482752	0.951725	0.0965504	0.882307	Down
BIOCARTA_FAS_PATHWAY	53	0.0151417	0.0484616	0.951538	0.0969233	0.882307	Down
YAGI_AML_FAB_MARKERS	252	0.00263235	0.048499	0.951501	0.0969981	0.882307	Down
BIOCARTA_MITOCHONDRIA_PATHWAY	34	-0.00507871	0.0486739	0.951326	0.0973478	0.882307	Down
ABRAHAM_ALPC_VS_MULTIPLE_MYELOMA_DN	23	-0.0135077	0.0489232	0.951077	0.0978464	0.882307	Down
BIOCARTA_CTLA4_PATHWAY	16	0.176178	0.0492145	0.950786	0.0984289	0.882307	Down
KEGG_RIBOFLAVIN_METABOLISM	17	0.00745952	0.0492471	0.950753	0.0984942	0.882307	Down
FARMER_BREAST_CANCER_CLUSTER_2	35	0.107364	0.0494462	0.950554	0.0988923	0.882307	Down
FUNG_IL2_SIGNALING_2	10	0.00677588	0.0494755	0.950525	0.098951	0.882307	Down
KYNG_DNA_DAMAGE_UP	151	0.0241529	0.0496794	0.950321	0.0993588	0.882307	Down
MODY_HIPPOCAMPUS_NEONATAL	16	0.0752112	0.0499351	0.950065	0.0998701	0.882307	Down
BYSTRYKH_HEMATOPOIESIS_STEM_CELL_AND_BRAIN_QTL_CIS	89	0.0103568	0.0499718	0.950028	0.0999437	0.882307	Down
Differentially expressed genes
ProbeID	TargetID	Symbol	logFC	AveExpr	t	P.Value	adj.P.Val	B
2140671	ONECUT2	Onecut2	3.293	7.34644	9.72181	5.03e-09	8e-05	8.22154
1030632	PCDHB22	Pcdhb22	2.587	8.88755	9.50026	7.37e-09	8e-05	7.98694
5270379	C730009D12	Onecut2	2.931	7.02471	7.19063	5.78e-07	0.00415	5.07639
6510255	2810405F04RIK	NA	1.376	6.00161	6.80863	1.27e-06	0.00686	4.50624
4640653	GABRB3	Gabrb3	2.103	6.1789	6.58337	2.05e-06	0.00739	4.15768
2100064	1700030C10RIK	1700030C10Rik	2.07	6.25609	6.54159	2.24e-06	0.00739	4.09204
1070341	4933439C20RIK	Pisd-ps3	1.626	12.3134	6.50846	2.4e-06	0.00739	4.03975
5890019	PCDHA7	Pcdha7	2.235	6.31478	6.30155	3.74e-06	0.01008	3.70881
1470392	LOC100046518	NA	2.359	8.12315	6.2317	4.35e-06	0.01042	3.59537
6480605	NLRP4E	Nlrp4e	1.547	5.86858	5.77014	1.2e-05	0.02584	2.8245
6270411	PCDH17	Pcdh17	2.23	8.02948	5.47127	2.34e-05	0.04588	2.30637
3120639	PCDHA7	Pcdha7	1.856	6.04591	5.36994	2.94e-05	0.05289	2.12751
5360228	LOR	Lor	2.634	8.515	5.23786	3.98e-05	0.06397	1.89207
7550053	GAD1	Gad1	3.209	8.53067	5.2185	4.15e-05	0.06397	1.85735
6940367	IVL	Ivl	2.389	6.54557	5.15872	4.76e-05	0.06627	1.7498
4150612	SMCHD1	Smchd1	-1.295	8.78069	-5.14459	4.92e-05	0.06627	1.72429
830437	GAD1	Gad1	3.321	8.00413	5.09809	5.47e-05	0.06938	1.64019
4490367	NDN	Ndn	2.273	11.2409	5.04676	6.16e-05	0.07371	1.54703
1990504	MKRN3	Mkrn3	1.665	7.59947	4.97536	7.25e-05	0.08229	1.41685
6350678	GATA6	Gata6	1.494	6.36449	4.93521	7.96e-05	0.08575	1.34335
610315	LDOC1L	Ldoc1l	1.678	6.59073	4.82881	0.000101717	0.1044	1.14765
5670739	MSX1	Msx1	2.699	7.98051	4.77944	0.000114028	0.11172	1.0564
7560202	SPRY3	Spry3	1.079	5.76562	4.69174	0.000139741	0.1242	0.893606
5550288	SH2D6	Sh2d6	1.495	5.93036	4.68222	0.000142864	0.1242	0.875887
3440646	PRKCB1	Prkcb	1.627	9.96043	4.67864	0.000144057	0.1242	0.869218
4180040	1700019N12RIK	1700019N12Rik	1.281	5.98582	4.64425	0.000156034	0.12935	0.805133
3140427	EPHB6	Ephb6	1.561	6.42463	4.53488	0.00020125	0.143	0.600498
1050224	PRKCB	Prkcb	1.788	7.2919	4.52485	0.000206009	0.143	0.581669
380438	TSHZ3	Tshz3	1.557	8.43882	4.51735	0.000209641	0.143	0.567589
7210192	GABRB3	Gabrb3	1.246	5.7765	4.51722	0.000209706	0.143	0.56734
620064	TNNT1	Tnnt1	2.986	7.75679	4.50981	0.000213355	0.143	0.553437
5080292	IGFBP5	Igfbp5	2.973	11.3204	4.48501	0.000226055	0.143	0.506816
3120136	GDF10	Gdf10	1.728	6.69915	4.48441	0.000226368	0.143	0.5057
6380097	1700019H03RIK	Slc17a9	1.284	6.66208	4.481	0.000228176	0.143	0.499282
4920243	GAD1	Gad1	2.85	8.01992	4.47351	0.0002322	0.143	0.485179
10544	RNF165	Rnf165	1.685	5.93413	4.45798	0.000240763	0.14415	0.455957
4260609	NME7	Nme7	1.837	8.41965	4.43546	0.00025375	0.14695	0.413536
270402	SGSM1	Sgsm1	1.141	5.65189	4.42655	0.000259079	0.14695	0.396749
4540309	2310005C01RIK	Nos1	1.628	6.45859	4.41224	0.000267877	0.14805	0.369765
2190162	LOC100040020	NA	2.718	6.71175	4.39958	0.000275912	0.14868	0.345879
580136	BVES	Bves	2.314	6.79051	4.34327	0.000314693	0.16544	0.239481
6370333	SH2D6	Sh2d6	1.407	6.14528	4.31094	0.000339393	0.17417	0.178285
3060360	PRKCB1	Prkcb	1.727	7.16204	4.26957	0.000373853	0.18719	0.0998931
5220475	B230373P09RIK	Dnahc1	1.133	6.18432	4.2602	0.000382128	0.18719	0.0821351
3830390	GRIK5	Grik5	1.776	6.13652	4.23949	0.000401096	0.19103	0.0428272
2260438	NPR3	Npr3	2.056	7.14812	4.23252	0.000407682	0.19103	0.0296077
2650731	AJAP1	Ajap1	1.319	5.75499	4.20052	0.000439367	0.19855	-0.03117
2850209	LOC100043986	NA	1.446	5.9646	4.19614	0.000443888	0.19855	-0.0394858
2900671	NPR3	Npr3	1.07	5.63946	4.18899	0.000451376	0.19855	-0.0530775
1190427	AVIL	Avil	1.597	6.27213	4.17647	0.000464797	0.20004	-0.0768878
5900551	PHF21B	Phf21b	1.62473	7.32799	4.16116	0.00048174	0.200037	-0.105991
6110088	KCNIP3	Kcnip3	1.81849	6.23935	4.1604	0.000482598	0.200037	-0.107438
130215	NME7	Nme7	1.97372	7.43249	4.08497	0.000575752	0.224615	-0.251042
6400450	GM1446	Vmn1r123	0.961241	5.49368	4.07948	0.000583189	0.224615	-0.261492
5050471	NRN1	Nrn1	2.42539	8.43629	4.06768	0.000599519	0.224615	-0.283985
430593	PCDHA6	Pcdha6	0.81971	5.50686	4.06581	0.00060215	0.224615	-0.287551
5130228	POPDC3	Popdc3	3.226	8.60935	4.06512	0.000603118	0.224615	-0.28886
6110341	CHRNG	Chrng	3.09223	6.87501	4.0642	0.000604419	0.224615	-0.290615
5960731	CDH23	Cdh23	1.48365	6.13648	4.05659	0.000615268	0.224771	-0.305108
2690435	PEG3	Peg3	1.58222	11.0331	4.02956	0.000655439	0.235455	-0.356649
1050358	ISL1	Isl1	3.29476	7.91156	4.01766	0.000673948	0.235935	-0.379351
5090736	ADCYAP1	Adcyap1	0.863438	5.52135	4.01468	0.000678667	0.235935	-0.38504
3130112	GLS2	Gls2	1.04941	6.1099	3.99928	0.000703555	0.240705	-0.414409
6940296	1110018J23RIK	Rbm20	2.82415	6.88118	3.97959	0.000736708	0.242161	-0.451969
2650382	MCPT8	Mcpt8	1.4637	6.34575	3.97289	0.000748356	0.242161	-0.464768
7400619	BVES	Bves	2.79505	8.20676	3.96327	0.000765383	0.242161	-0.483126
290193	PDZRN4	Pdzrn4	1.91801	8.22007	3.95432	0.000781561	0.242161	-0.500197
2680523	RPRML	Rprml	1.96276	6.90859	3.94709	0.000794897	0.242161	-0.514007
160100	IGFBP5	Igfbp5	2.98223	11.5799	3.94632	0.00079633	0.242161	-0.515477
7000398	LOC673578	NA	1.52105	7.21813	3.94238	0.000803697	0.242161	-0.522994
1170553	NUDT11	Nudt11	1.32029	6.6864	3.94034	0.000807534	0.242161	-0.526883
1230332	H2-M1	H2-M1	1.50693	5.72481	3.93961	0.000808928	0.242161	-0.528291
1170435	1700093K21RIK	1700093K21Rik	2.71542	7.10673	3.88367	0.000921938	0.272212	-0.635095
4590414	IGFBP5	Igfbp5	2.53755	11.8387	3.8694	0.000953185	0.277635	-0.662333
3450064	B130052F17RIK	NA	1.89051	6.38849	3.86193	0.000969974	0.278758	-0.676603
3180195	TMEM120B	Tmem120b	1.12275	8.13066	3.83481	0.00103341	0.293081	-0.728395
7210079	MUC16	Muc16	1.6103	6.1118	3.82746	0.00105131	0.294284	-0.742433
4250646	3110007F17RIK	3110007F17Rik	1.36691	6.24622	3.8025	0.0011144	0.306893	-0.790098
7650370	CDH15	Cdh15	3.17235	6.59456	3.7985	0.00112483	0.306893	-0.797721
4280131	SLC24A3	Slc24a3	1.94081	9.19125	3.77781	0.00118048	0.315709	-0.837228
4610288	GARNL3	Garnl3	1.08997	8.49048	3.77566	0.00118644	0.315709	-0.841348
3850463	TRAF1	Traf1	1.10143	9.32951	3.74697	0.00126855	0.333336	-0.896115
6650646	ITGB4	Itgb4	1.39041	9.82762	3.74051	0.00128779	0.333336	-0.908438
4290300	SP5	Sp5	2.18289	8.17528	3.73522	0.00130379	0.333336	-0.918547
110026	A930004K21RIK	Frmd5	2.14408	6.7581	3.7317	0.00131454	0.333336	-0.925269
3180402	KLRA22	Klra22	1.73355	9.89145	3.7234	0.0013402	0.335891	-0.941094
4050026	CACNA1H	Cacna1h	1.50316	8.593	3.6794	0.00148488	0.367874	-1.02505
2850403	MID1	Mid1	1.88007	8.45288	3.6592	0.00155638	0.367974	-1.06358
6420471	MYH3	Myh3	1.82756	5.85618	3.65248	0.00158093	0.367974	-1.0764
3060400	PRODH	Prodh	1.20738	6.80386	3.6524	0.00158122	0.367974	-1.07655
1410438	NEO1	Neo1	1.2256	9.07791	3.6523	0.00158158	0.367974	-1.07674
2260066	TNNI2	Tnni2	1.28787	7.60279	3.64962	0.00159147	0.367974	-1.08184
1030482	SLC29A4	Slc29a4	0.760278	5.43849	3.64073	0.00162471	0.367974	-1.09878
2940114	OSBPL6	Osbpl6	1.40501	9.95248	3.63743	0.00163726	0.367974	-1.10508
4610431	TTYH1	Ttyh1	1.23691	10.56	3.63715	0.00163832	0.367974	-1.10562
7510692	C630025L14	NA	1.42674	7.89065	3.63699	0.00163893	0.367974	-1.10592
1500347	CRISP1	Crisp1	1.77358	5.8662	3.60984	0.00174573	0.387912	-1.15765
4220364	RYR1	Ryr1	2.13474	6.65721	3.59612	0.00180227	0.395892	-1.18378
2470753	AMIGO2	Amigo2	1.02822	9.40998	3.59229	0.00181838	0.395892	-1.19107
5560468	GLDC	Gldc	2.08658	8.50425	3.57706	0.00188388	0.406051	-1.22008

## Sheet: Table S4 - E17.5 preB cells
Table S4
MSigDB C2 Curated Gene Sets	NGenes	Correlation	Down	Up	TwoSided	FDR	Direction
TIS7_OVEREXP_DN	10	-0.0486367	0.993587	0.00641294	0.0128259	0.973472	Up
ZMPSTE24_KO_UP	35	-0.0180612	0.99062	0.00937975	0.0187595	0.973472	Up
CALRES_RHESUS_UP	53	-0.00104065	0.988746	0.0112541	0.0225082	0.973472	Up
TSP1PATHWAY	5	-0.212569	0.988645	0.0113549	0.0227098	0.973472	Up
IL2PATHWAY	23	0.0025558	0.988491	0.0115095	0.0230189	0.973472	Up
IL3PATHWAY	16	0.00871434	0.986531	0.0134687	0.0269374	0.973472	Up
NGFPATHWAY	19	-0.0368816	0.9865	0.0134999	0.0269997	0.973472	Up
DREAMPATHWAY	13	-0.00989369	0.986203	0.0137973	0.0275946	0.973472	Up
CROONQUIST_RAS_STROMA_DN	7	-0.0987478	0.985303	0.0146972	0.0293945	0.973472	Up
KANNAN_P53_UP	35	0.0254146	0.984868	0.0151319	0.0302638	0.973472	Up
UVB_NHEK1_C4	9	-0.035246	0.982871	0.0171287	0.0342573	0.973472	Up
FALT_B_CLL_UP	59	-0.0041149	0.982417	0.0175832	0.0351665	0.973472	Up	Falt et al, Blood, 2005
GLOBOSIDE_METABOLISM	6	-0.024851	0.981822	0.0181784	0.0363568	0.973472	Up
HSA00603_GLYCOSPHINGOLIPID_BIOSYNTHESIS_GLOBOSERIES	6	-0.119498	0.978298	0.0217016	0.0434033	0.973472	Up
UVB_NHEK2_UP	80	0.00335967	0.977943	0.0220567	0.0441133	0.973472	Up
SARCOMAS_LEIOMYOSARCOMA_UP	8	0.0591034	0.977619	0.0223806	0.0447612	0.973472	Up
ET743_RESIST_UP	21	0.0422909	0.977467	0.0225331	0.0450663	0.973472	Up
EPOPATHWAY	22	-0.00221984	0.976371	0.0236294	0.0472587	0.973472	Up
P53GENES_ALL	21	-0.00278044	0.97608	0.0239198	0.0478396	0.973472	Up
CARDIACEGFPATHWAY	9	-0.0368647	0.976064	0.0239359	0.0478718	0.973472	Up
HDACI_COLON_BUT48HRS_UP	75	-0.0107763	0.975997	0.0240028	0.0480056	0.973472	Up
UVC_HIGH_ALL_UP	12	-0.0286045	0.974248	0.0257524	0.0515048	0.973472	Up
RAY_P210_DIFF	41	-0.00414401	0.973863	0.0261372	0.0522744	0.973472	Up
BCNU_GLIOMA_NOMGMT_24HRS_UP	14	-0.0371982	0.97383	0.0261705	0.052341	0.973472	Up
FLECHNER_KIDNEY_TRANSPLANT_REJECTION_PBL_UP	78	-0.00247601	0.972312	0.027688	0.055376	0.973472	Up
SANA_IFNG_ENDOTHELIAL_UP	46	0.0442995	0.971576	0.0284242	0.0568485	0.973472	Up
ZHAN_PCS_MULTIPLE_MYELOMA_SPKD	10	-0.0247298	0.970632	0.0293676	0.0587352	0.973472	Up
BRENTANI_CYTOSKELETON	11	0.0591656	0.969649	0.0303508	0.0607016	0.973472	Up
IL6PATHWAY	27	0.0315991	0.96807	0.0319303	0.0638606	0.973472	Up
VEGF_MMMEC_6HRS_UP	16	-0.049168	0.967904	0.0320961	0.0641922	0.973472	Up
5FU_RESIST_GASTRIC_UP	22	0.0250768	0.967205	0.0327952	0.0655905	0.973472	Up
BIOSYNTHESIS_OF_STEROIDS	19	0.00731018	0.96618	0.0338196	0.0676393	0.973472	Up
MITOCHONDRIAPATHWAY	24	0.00998185	0.965102	0.0348981	0.0697963	0.973472	Up
JNK_UP	19	0.0748638	0.965048	0.0349515	0.0699031	0.973472	Up
BLYMPHOCYTEPATHWAY	10	-0.0243875	0.964699	0.0353006	0.0706013	0.973472	Up
IL4PATHWAY	9	-0.057536	0.963865	0.0361347	0.0722695	0.973472	Up
YU_CMYC_DN	61	0.11812	0.963732	0.0362683	0.0725365	0.973472	Up
MOREAUX_TACI_HI_VS_LOW_UP	234	0.000286884	0.963423	0.0365773	0.0731546	0.973472	Up
IFNA_UV-CMV_COMMON_HCMV_6HRS_UP	18	-0.0100015	0.96333	0.0366699	0.0733398	0.973472	Up
4NQO_ESR_OLD_UNREG	7	0.0466976	0.962821	0.0371786	0.0743573	0.973472	Up
CIS_RESIST_GASTRIC_UP	11	-0.058219	0.96097	0.0390297	0.0780594	0.973472	Up
SPPAPATHWAY	18	-0.0206944	0.960301	0.0396995	0.0793989	0.973472	Up
ZHAN_MULTIPLE_MYELOMA_CD1_VS_CD2_DN	40	-0.0112786	0.958258	0.0417417	0.0834834	0.973472	Up	Zhan et al, Blood, 2006
CDMACPATHWAY	19	-0.02506	0.957847	0.0421526	0.0843053	0.973472	Up
GAMMA_ESR_WS_UNREG	30	0.0463563	0.954556	0.0454436	0.0908872	0.973472	Up
CELL_SURFACE_RECEPTOR_LINKED_SIGNAL_TRANSDUCTION	73	0.0474885	0.952608	0.0473921	0.0947843	0.973472	Up
STRESS_GENOTOXIC_SPECIFIC_UP	24	-0.0102377	0.951494	0.0485056	0.0970111	0.973472	Up
PHOSPHATIDYLINOSITOL_SIGNALING_SYSTEM	75	-0.0057277	0.951169	0.0488305	0.0976611	0.973472	Up
ACE_INHIBITOR_PATHWAY_PHARMGKB	2	0.218955	0.00215811	0.997842	0.00431622	0.973472	Down
HSA04610_COMPLEMENT_AND_COAGULATION_CASCADES	18	0.0586615	0.00595418	0.994046	0.0119084	0.973472	Down
HOFMANN_MANTEL_LYMPHOMA_VS_LYMPH_NODES_UP	67	-0.0109093	0.00628017	0.99372	0.0125603	0.973472	Down
BLOOD_CLOTTING_CASCADE	5	-0.13748	0.00691189	0.993088	0.0138238	0.973472	Down
LEE_MYC_DN	27	-0.0288954	0.00788269	0.992117	0.0157654	0.973472	Down
HSA03320_PPAR_SIGNALING_PATHWAY	44	-0.000519164	0.0117205	0.98828	0.0234409	0.973472	Down
OLDONLY_FIBRO_UP	38	-0.0198525	0.0121935	0.987807	0.024387	0.973472	Down
ALTERNATIVEPATHWAY	1	NA	0.0124182	0.987582	0.0248364	0.973472	Down
COMPPATHWAY	1	NA	0.0124182	0.987582	0.0248364	0.973472	Down
CLASSICPATHWAY	1	NA	0.0124182	0.987582	0.0248364	0.973472	Down
INTRINSICPATHWAY	7	-0.0441823	0.0146302	0.98537	0.0292605	0.973472	Down
AGED_MOUSE_HIPPOCAMPUS_MULTI_UP	21	0.0100699	0.0149592	0.985041	0.0299184	0.973472	Down
EXTRINSICPATHWAY	7	-0.0780167	0.0165963	0.983404	0.0331927	0.973472	Down
CHEOK_HDMTX_UP	2	0.994503	0.0177082	0.982292	0.0354164	0.973472	Down
LAL_KO_3MO_UP	21	-0.0194926	0.0192402	0.98076	0.0384805	0.973472	Down
FLECHNER_KIDNEY_TRANSPLANT_REJECTION_DN	478	-0.00112535	0.0200662	0.979934	0.0401325	0.973472	Down
AGED_MOUSE_NEOCORTEX_DN	41	-0.0149854	0.020682	0.979318	0.041364	0.973472	Down
BECKER_TAMOXIFEN_RESISTANT_DN	40	-0.0129323	0.0209351	0.979065	0.0418701	0.973472	Down
BYSTRYKH_SCP2_CIS_TRANSCRIPTS_GLOCUS	11	-0.00502376	0.0219487	0.978051	0.0438974	0.973472	Down
OLDAGE_DN	64	-0.00521284	0.022069	0.977931	0.044138	0.973472	Down
HSIAO_LIVER_SPECIFIC_GENES	145	0.0227234	0.0237228	0.976277	0.0474457	0.973472	Down
HANSON_NFKAPPB_IND	6	-0.116482	0.0243152	0.975685	0.0486304	0.973472	Down
HYPOPHYSECTOMY_RAT_DN	42	0.00276446	0.0253006	0.974699	0.0506013	0.973472	Down
AGEING_KIDNEY_SPECIFIC_DN	111	0.00900666	0.0298892	0.970111	0.0597784	0.973472	Down
JNK_DN	19	-0.0111897	0.0299686	0.970031	0.0599371	0.973472	Down
OLD_FIBRO_UP	57	-0.00870239	0.0308284	0.969172	0.0616569	0.973472	Down
CHEN_HOXA5_TARGETS_DN	56	0.0265088	0.0338414	0.966159	0.0676828	0.973472	Down
FIBRINOLYSISPATHWAY	4	-0.134638	0.0344199	0.96558	0.0688397	0.973472	Down
LEE_MYC_TGFA_UP	53	-0.00731591	0.0373533	0.962647	0.0747065	0.973472	Down
ABRAHAM_AL_VS_MM_UP	19	0.00451384	0.0373964	0.962604	0.0747928	0.973472	Down
FATTY_ACID_DEGRADATION	35	0.0421266	0.0376575	0.962343	0.0753149	0.973472	Down
ELONGINA_KO_DN	173	0.00352363	0.0385777	0.961422	0.0771554	0.973472	Down
TESTIS_EXPRESSED_GENES	30	0.0385647	0.0393636	0.960636	0.0787272	0.973472	Down
MTX_RES_XENOGRAFTS_UP	5	-0.00692004	0.0397609	0.960239	0.0795217	0.973472	Down
LEE_ACOX1_DN	34	-0.000646129	0.0405772	0.959423	0.0811544	0.973472	Down
UVC_LOW_C1_DN	14	-0.0153599	0.0413378	0.958662	0.0826755	0.973472	Down
G1PATHWAY	35	-0.0107272	0.0416637	0.958336	0.0833275	0.973472	Down
SA_G2_AND_M_PHASES	10	-0.0969908	0.0436081	0.956392	0.0872161	0.973472	Down
NOUZOVA_CPG_METHLTD	26	0.01328	0.0445676	0.955432	0.0891352	0.973472	Down
OLDWERNER_FIBRO_DN	109	-0.0030576	0.0446645	0.955335	0.089329	0.973472	Down
HDACI_COLON_BUT30MIN_DN	43	-0.00824475	0.0450052	0.954995	0.0900104	0.973472	Down
COMPLEMENT_ACTIVATION_CLASSICAL	2	-0.0135051	0.0451753	0.954825	0.0903505	0.973472	Down
BRCA1KO_MEF_DN	102	0.020493	0.0464019	0.953598	0.0928039	0.973472	Down
BREASTCA_TWO_CLASSES	169	0.00969366	0.0466112	0.953389	0.0932223	0.973472	Down
HSA00071_FATTY_ACID_METABOLISM	38	0.034263	0.0466245	0.953375	0.093249	0.973472	Down
VALINE_LEUCINE_AND_ISOLEUCINE_DEGRADATION	39	0.0199949	0.0475974	0.952403	0.0951949	0.973472	Down
BECKER_CANCER_ASSOCIATED_SUBSET_2	10	-0.0788065	0.0484132	0.951587	0.0968264	0.973472	Down
CIRCADIAN_EXERCISE	46	0.0609343	0.0486351	0.951365	0.0972702	0.973472	Down
BYSTRYKH_FGF3_TARGETS_GLOCUS	7	-0.0654254	0.0492069	0.950793	0.0984138	0.973472	Down
Differentially expressed genes
ProbeID	Symbol	logFC	AveExpr	t	P.Value	adj.P.Val	B
4490367	Ndn	4.29753	8.7023	31.6045	3.06407e-11	4.86513e-07	8.7376
4150612	Smchd1	-4.75968	7.23994	-27.2916	1.28267e-10	1.01831e-06	8.48772
7000682	Ambp	-3.50824	6.61004	-15.0249	4.03801e-08	0.000213718	6.68595
5820315	Afp	-3.54711	6.42528	-12.4588	2.351e-07	0.000933231	5.80841
2360553	Smchd1	-2.45578	5.9478	-11.5367	4.79916e-07	0.00152402	5.40481
4290521	Kng1	-2.96533	6.27937	-10.7874	8.89969e-07	0.0021853	5.03327
6480326	Ahsg	-4.08763	7.16423	-10.6943	9.63417e-07	0.0021853	4.98408
6420131	Apoa2	-2.60067	6.89611	-10.4254	1.21552e-06	0.0024125	4.838
2120152	Serpina1b	-3.54141	6.98291	-10.0724	1.66207e-06	0.00279897	4.63686
2510204	Apoa1	-3.20462	6.48849	-10.0072	1.7628e-06	0.00279897	4.59847
2650463	Serpina1b	-3.26065	6.52036	-9.66247	2.41878e-06	0.0034914	4.389
4880026	Tspan17	1.69668	6.99706	9.51694	2.77216e-06	0.00366803	4.29714
1430253	Serpina1b	-2.91626	6.46563	-9.08746	4.18807e-06	0.00511525	4.01352
2100035	Ahsg	-3.1281	6.70096	-8.95735	4.76051e-06	0.0053991	3.92374
2690364	Serpina1d	-2.68623	6.40758	-8.74156	5.90709e-06	0.00625285	3.77074
3190392	C030034I22Rik	-1.85225	6.09281	-8.3827	8.53806e-06	0.00847295	3.50443
6350537	Apoa2	-3.24823	7.29212	-8.31475	9.16749e-06	0.00856244	3.45228
2680113	Ttr	-3.81007	7.6269	-8.09609	1.15612e-05	0.00993338	3.28059
6770564	Itih3	-1.77717	5.61613	-8.07023	1.18865e-05	0.00993338	3.25988
7650360	Lbh	1.89525	7.29565	7.80533	1.58576e-05	0.0125894	3.04284
1990504	Mkrn3	1.65597	5.81765	7.32781	2.71709e-05	0.0203328	2.62776
1070341	Pisd-ps3	1.80209	9.41035	7.29649	2.81724e-05	0.0203328	2.59943
5050653	Igf2	-3.46174	7.46476	-7.11143	3.49717e-05	0.0241427	2.42908
7210039	Gpc1	1.62263	7.53547	7.05301	3.7473e-05	0.0247915	2.37426
2760187	Apom	-1.21052	6.03651	-6.71836	5.61012e-05	0.035631	2.05032
1340626	Kng1	-1.39821	5.409	-6.45151	7.81633e-05	0.0477337	1.77955
2750066	Rn18s	-0.618108	13.5484	-6.30661	9.39424e-05	0.0552451	1.62773
6250121	Serpina1c	-1.24527	5.53861	-6.21374	0.000105844	0.060021	1.52863
3710706	Serpina1a	-1.47201	5.49392	-6.13832	0.000116707	0.0633879	1.44709
2100064	1700030C10Rik	1.69375	6.2814	6.11845	0.000119766	0.0633879	1.42545
7040044	Trf	-3.02331	7.2982	-6.03807	0.000133047	0.0681459	1.33725
7560291	Jun	1.29636	5.59911	5.90934	0.000157739	0.0776524	1.19371
6220274	NA	1.12031	5.94866	5.89217	0.000161389	0.0776524	1.17436
360431	Serpina1a	-1.13148	5.29635	-5.86033	0.000168401	0.0786433	1.13832
510056	NA	0.942118	7.59432	5.82057	0.000177619	0.0805782	1.0931
3840082	Gm5433	1.11557	5.43421	5.75785	0.000193284	0.0844961	1.02119
1170280	Fgg	-1.44253	5.66978	-5.74416	0.000196899	0.0844961	1.0054
3460142	Bach2	-0.664538	10.3844	-5.4756	0.000284651	0.118939	0.68916
6770671	Vtn	-1.30881	5.27636	-5.44	0.000299132	0.121785	0.646294
1050358	Isl1	1.26236	5.36436	5.36054	0.000334383	0.132733	0.549807
4070767	NA	-0.606033	11.1382	-5.29408	0.000367289	0.142239	0.468255
3520240	Rn18s	-0.428877	14.564	-5.25963	0.000385695	0.145811	0.42568
3940242	Samd9l	1.11449	7.99086	5.22459	0.000405435	0.149709	0.382156
1980129	NA	1.40334	5.90439	5.08576	0.000494936	0.178604	0.2076
6940037	Ltf	-1.97593	8.96376	-4.97944	0.00057771	0.203842	0.0716074
5860347	C3	-2.25857	6.16984	-4.94458	0.000607977	0.209858	0.02658
2190500	1300017J02Rik	-1.06615	5.26586	-4.90425	0.000645102	0.217935	-0.025759
2900139	Ube2e2	0.958647	5.23056	4.81453	0.000736678	0.243687	-0.143257
1710066	Apoc1	-1.79514	5.81544	-4.7942	0.000759291	0.246041	-0.170072
730487	Ngp	-2.21771	7.11342	-4.77064	0.000786422	0.249736	-0.201235
3370445	A630001G21Rik	0.856006	5.92587	4.72382	0.000843467	0.259351	-0.263468
6940504	Mir17hg	-0.674748	10.3631	-4.71109	0.000859726	0.259351	-0.280453
510368	Fos	2.17862	5.65894	4.69895	0.000875543	0.259351	-0.296679
3610528	NA	1.02334	5.27825	4.69403	0.000882036	0.259351	-0.303256
4780255	Frat2	-0.663563	8.44002	-4.671	0.000913134	0.263613	-0.334118
4040209	NA	1.07928	6.65236	4.60061	0.00101564	0.284832	-0.429029
7610097	Spink3	-1.22226	5.61366	-4.59617	0.00102251	0.284832	-0.435047
450671	Umod	1.13373	5.51993	4.5345	0.00112309	0.303268	-0.518937
5960465	NA	0.817455	7.68386	4.52915	0.0011323	0.303268	-0.526243
1690091	Vim	0.607388	10.6899	4.52128	0.00114599	0.303268	-0.537006
4590136	Actn1	-0.798185	7.50596	-4.49956	0.00118469	0.30837	-0.566752
630403	Rbm3	-0.846019	6.68999	-4.46631	0.00124665	0.319264	-0.61245
5310682	Asap2	1.04685	6.12939	4.34138	0.00151193	0.377748	-0.785793
5890195	Smoc1	1.0741	6.39236	4.32611	0.00154826	0.377748	-0.807165
5310600	Pdcd4	-0.641251	10.7522	-4.32136	0.00155973	0.377748	-0.813812
450670	Camp	-2.45018	7.59884	-4.31707	0.00157019	0.377748	-0.819831
4880187	Erdr1	1.1132	8.3935	4.28089	0.0016613	0.393702	-0.870659
5090064	NA	-0.524561	13.2659	-4.24166	0.00176641	0.412456	-0.925998
1190546	S100a8	-1.91361	11.5024	-4.20092	0.00188305	0.425731	-0.983739
7100674	Ly96	0.789624	7.35521	4.1967	0.0018956	0.425731	-0.98974
4480753	2410018L13Rik	1.04869	5.8041	4.19399	0.0019037	0.425731	-0.993592
1940113	Pdcd4	-0.617649	10.3904	-4.16174	0.0020029	0.441696	-1.03951
5570168	NA	1.2801	6.46415	4.13736	0.00208154	0.452748	-1.07434
6040605	NA	0.939032	5.98956	4.12712	0.00211551	0.453921	-1.089
7000438	Prrc2c	-0.647644	7.76237	-4.11332	0.00216224	0.457762	-1.10877
6860270	NA	0.798982	5.30379	4.10273	0.00219885	0.459386	-1.12397

## Sheet: Table S4- Premalignant preB
Table S4
MSigDB C2 Curated Gene Sets	NGenes	Correlation	Down	Up	TwoSided	FDR	Direction
XU_HGF_SIGNALING_NOT_VIA_AKT1_6HR	17	-0.00423383	0.999516	0.000484469	0.000968938	0.606594	Up
DELYS_THYROID_CANCER_UP	250	0.00990461	0.999071	0.000929026	0.00185805	0.606594	Up
ZHAN_MULTIPLE_MYELOMA_SPIKED	12	0.00140113	0.99878	0.00122031	0.00244061	0.606594	Up
WHITESIDE_CISPLATIN_RESISTANCE_UP	9	0.00857164	0.998481	0.0015193	0.00303861	0.606594	Up
BUSA_SAM68_TARGETS_UP	3	0.728653	0.99821	0.00179014	0.00358028	0.606594	Up
CHIARADONNA_NEOPLASTIC_TRANSFORMATION_KRAS_CDC25_UP	58	0.0339238	0.997794	0.00220606	0.00441212	0.606594	Up
SANCHEZ_MDM2_TARGETS	12	0.149576	0.997714	0.00228598	0.00457196	0.606594	Up
LIANG_HEMATOPOIESIS_STEM_CELL_NUMBER_LARGE_VS_TINY_UP	42	0.0364008	0.997391	0.00260906	0.00521811	0.606594	Up
HOFMANN_MYELODYSPLASTIC_SYNDROM_RISK_UP	17	0.0141656	0.997345	0.00265549	0.00531097	0.606594	Up
MAHADEVAN_RESPONSE_TO_MP470_UP	8	0.0570665	0.997202	0.00279847	0.00559693	0.606594	Up
SWEET_LUNG_CANCER_KRAS_UP	454	0.00379217	0.996974	0.00302622	0.00605245	0.606594	Up
MAINA_VHL_TARGETS_DN	8	0.142692	0.996802	0.00319784	0.00639569	0.606594	Up
OHM_METHYLATED_IN_ADULT_CANCERS	20	0.0372966	0.996568	0.00343228	0.00686455	0.606594	Up
PYEON_HPV_POSITIVE_TUMORS_DN	5	0.453196	0.996423	0.00357714	0.00715429	0.606594	Up
MYLLYKANGAS_AMPLIFICATION_HOT_SPOT_11	6	0.125459	0.996188	0.00381237	0.00762473	0.606594	Up
BIOCARTA_IL6_PATHWAY	32	0.00838627	0.995693	0.00430722	0.00861444	0.606594	Up
IVANOVA_HEMATOPOIESIS_LATE_PROGENITOR	140	0.00533416	0.995558	0.0044421	0.0088842	0.606594	Up
WU_CELL_MIGRATION	83	0.0136547	0.99539	0.00461032	0.00922064	0.606594	Up
HELLEBREKERS_SILENCED_DURING_TUMOR_ANGIOGENESIS	30	-0.0144397	0.994525	0.00547488	0.0109498	0.606594	Up
YAO_TEMPORAL_RESPONSE_TO_PROGESTERONE_CLUSTER_16	46	0.00211344	0.994298	0.00570203	0.0114041	0.606594	Up
DIRMEIER_LMP1_RESPONSE_LATE_DN	35	0.0219311	0.994157	0.0058425	0.011685	0.606594	Up
KHETCHOUMIAN_TRIM24_TARGETS_UP	30	0.0670279	0.994107	0.00589269	0.0117854	0.606594	Up
LANDIS_BREAST_CANCER_PROGRESSION_DN	38	0.0053148	0.993909	0.00609059	0.0121812	0.606594	Up
LE_EGR2_TARGETS_DN	77	0.0230183	0.993494	0.00650607	0.0130121	0.606594	Up
ROSS_LEUKEMIA_WITH_MLL_FUSIONS	70	0.0158106	0.993467	0.00653265	0.0130653	0.606594	Up	Ross et al, Blood, 2004
WONG_ENDMETRIUM_CANCER_DN	13	-0.0316148	0.99332	0.00668021	0.0133604	0.606594	Up
BOYLAN_MULTIPLE_MYELOMA_PCA3_UP	33	0.0510973	0.993026	0.00697448	0.013949	0.606594	Up
HOLLMAN_APOPTOSIS_VIA_CD40_DN	278	-0.000741717	0.992872	0.00712772	0.0142554	0.606594	Up
RUTELLA_RESPONSE_TO_HGF_VS_CSF2RB_AND_IL4_UP	339	0.00654449	0.992418	0.00758171	0.0151634	0.606594	Up
LANDIS_ERBB2_BREAST_TUMORS_324_DN	101	0.00180017	0.992343	0.00765653	0.0153131	0.606594	Up
RORIE_TARGETS_OF_EWSR1_FLI1_FUSION_DN	6	0.0199496	0.992152	0.00784777	0.0156955	0.606594	Up
ZHAN_MULTIPLE_MYELOMA_CD1_VS_CD2_UP	45	0.0119933	0.992079	0.00792095	0.0158419	0.606594	Up
AMIT_EGF_RESPONSE_40_MCF10A	17	-0.02034	0.99155	0.00844964	0.0168993	0.606594	Up
HOFFMANN_PRE_BI_TO_LARGE_PRE_BII_LYMPHOCYTE_DN	59	0.0665986	0.991534	0.00846605	0.0169321	0.606594	Up
DAVICIONI_MOLECULAR_ARMS_VS_ERMS_DN	106	0.00178545	0.991245	0.00875529	0.0175106	0.606594	Up
PICCALUGA_ANGIOIMMUNOBLASTIC_LYMPHOMA_UP	88	0.0212356	0.990802	0.00919801	0.018396	0.606594	Up
WANG_ESOPHAGUS_CANCER_VS_NORMAL_UP	89	0.0060352	0.990306	0.0096938	0.0193876	0.606594	Up
COULOUARN_TEMPORAL_TGFB1_SIGNATURE_DN	100	0.0103138	0.990272	0.00972756	0.0194551	0.606594	Up
CASORELLI_APL_SECONDARY_VS_DE_NOVO_UP	24	0.0383659	0.990037	0.00996348	0.019927	0.606594	Up
ONDER_CDH1_TARGETS_2_DN	198	0.00929626	0.989899	0.0101006	0.0202011	0.606594	Up
VERNELL_RETINOBLASTOMA_PATHWAY_DN	8	0.145187	0.989886	0.0101136	0.0202271	0.606594	Up
LOPEZ_MESOTHELIOMA_SURVIVAL_WORST_VS_BEST_UP	17	0.0236255	0.989863	0.0101372	0.0202745	0.606594	Up
LEE_LIVER_CANCER_MYC_TGFA_UP	51	0.0259187	0.989785	0.0102145	0.0204291	0.606594	Up
CHASSOT_SKIN_WOUND	8	-0.0305651	0.989672	0.0103276	0.0206551	0.606594	Up
LIANG_SILENCED_BY_METHYLATION_UP	15	-0.0139598	0.989607	0.0103932	0.0207864	0.606594	Up
KANG_CISPLATIN_RESISTANCE_UP	15	0.015424	0.989444	0.010556	0.021112	0.606594	Up
VERRECCHIA_RESPONSE_TO_TGFB1_C3	10	0.017872	0.989388	0.0106119	0.0212238	0.606594	Up
MOOTHA_GLUCONEOGENESIS	24	0.00919376	0.988754	0.0112459	0.0224918	0.606594	Up
WILLERT_WNT_SIGNALING	23	0.0758825	0.988733	0.0112671	0.0225343	0.606594	Up
XU_RESPONSE_TO_TRETINOIN_AND_NSC682994_UP	16	0.0323337	0.988728	0.0112717	0.0225434	0.606594	Up
LOPES_METHYLATED_IN_COLON_CANCER_UP	10	0.0179821	0.98868	0.0113204	0.0226408	0.606594	Up
HUANG_FOXA2_TARGETS_DN	17	0.046919	0.988613	0.0113867	0.0227733	0.606594	Up
HAHTOLA_MYCOSIS_FUNGOIDES_CD4_UP	51	0.0288061	0.98852	0.0114804	0.0229608	0.606594	Up
RIGGI_EWING_SARCOMA_PROGENITOR_UP	202	0.00157419	0.988374	0.0116262	0.0232524	0.606594	Up
HENDRICKS_SMARCA4_TARGETS_UP	47	0.0189769	0.988293	0.0117066	0.0234133	0.606594	Up
BIOCARTA_MCALPAIN_PATHWAY	23	0.0280969	0.988119	0.011881	0.0237619	0.606594	Up
MARSON_FOXP3_TARGETS_UP	68	-0.00247534	0.988085	0.0119152	0.0238304	0.606594	Up
LOPEZ_MESOTHELIOMA_SURVIVAL_OVERALL_DN	13	-0.0290111	0.987941	0.0120592	0.0241183	0.606594	Up
REACTOME_ADHERENS_JUNCTIONS_INTERACTIONS	12	-0.0183472	0.987893	0.0121071	0.0242142	0.606594	Up
CASTELLANO_NRAS_TARGETS_UP	46	0.0766277	0.987671	0.0123285	0.0246571	0.606594	Up
KEGG_ALANINE_ASPARTATE_AND_GLUTAMATE_METABOLISM	26	0.0265494	0.987478	0.0125225	0.0250449	0.606594	Up
HOFFMANN_SMALL_PRE_BII_TO_IMMATURE_B_LYMPHOCYTE_UP	52	0.00266201	0.987459	0.0125414	0.0250828	0.606594	Up
LU_TUMOR_ENDOTHELIAL_MARKERS_UP	12	-0.032258	0.987312	0.0126876	0.0253753	0.606594	Up
MCCLUNG_CREB1_TARGETS_UP	71	0.00653841	0.987269	0.0127309	0.0254619	0.606594	Up
REACTOME_G_PROTEIN_ACTIVATION	16	0.000878485	0.98726	0.0127403	0.0254805	0.606594	Up
AMIT_EGF_RESPONSE_60_MCF10A	29	0.0198977	0.987217	0.0127834	0.0255667	0.606594	Up
DACOSTA_UV_RESPONSE_VIA_ERCC3_TTD_UP	52	-0.00174315	0.987208	0.0127925	0.0255849	0.606594	Up
TSAI_DNAJB4_TARGETS_UP	15	0.0814858	0.987171	0.0128285	0.025657	0.606594	Up
BREDEMEYER_RAG_SIGNALING_VIA_ATM_NOT_VIA_NFKB_UP	43	-0.00528873	0.98696	0.0130399	0.0260797	0.606594	Up
BIOCARTA_INTEGRIN_PATHWAY	36	-0.00317154	0.986877	0.0131229	0.0262458	0.606594	Up
SIMBULAN_UV_RESPONSE_IMMORTALIZED_DN	27	-0.0021571	0.986863	0.0131369	0.0262738	0.606594	Up
LIN_APC_TARGETS	74	-0.00244893	0.985786	0.0142142	0.0284285	0.606594	Up
LIAN_LIPA_TARGETS_3M	27	0.0710285	0.985763	0.0142367	0.0284734	0.606594	Up
NEWMAN_ERCC6_TARGETS_DN	8	0.112923	0.985554	0.0144462	0.0288924	0.606594	Up
BIOCARTA_UCALPAIN_PATHWAY	11	0.0591279	0.98521	0.0147897	0.0295795	0.606594	Up
SEITZ_NEOPLASTIC_TRANSFORMATION_BY_8P_DELETION_UP	33	0.03173	0.98519	0.0148101	0.0296201	0.606594	Up
LENAOUR_DENDRITIC_CELL_MATURATION_UP	80	0.0233491	0.984564	0.0154355	0.0308711	0.606594	Up
LENAOUR_DENDRITIC_CELL_MATURATION_DN	100	0.0112843	0.983944	0.0160558	0.0321116	0.606594	Up
LI_PROSTATE_CANCER_EPIGENETIC	22	0.000464379	0.983915	0.0160846	0.0321692	0.606594	Up
MISHRA_CARCINOMA_ASSOCIATED_FIBROBLAST_UP	9	0.178716	0.983843	0.0161568	0.0323137	0.606594	Up
SENESE_HDAC2_TARGETS_DN	55	0.0150576	0.983545	0.0164554	0.0329109	0.606594	Up
KOBAYASHI_EGFR_SIGNALING_6HR_DN	10	0.198969	0.98318	0.0168197	0.0336393	0.606594	Up
NAKAYAMA_SOFT_TISSUE_TUMORS_PCA1_UP	35	0.178682	0.982109	0.0178911	0.0357822	0.606594	Up
PROVENZANI_METASTASIS_DN	119	0.00304016	0.98194	0.01806	0.03612	0.606594	Up
RUTELLA_RESPONSE_TO_HGF_UP	343	0.00470104	0.981806	0.018194	0.0363879	0.606594	Up
BIOCARTA_IL3_PATHWAY	17	0.0403079	0.981768	0.0182318	0.0364635	0.606594	Up
CHIANG_LIVER_CANCER_SUBCLASS_INTERFERON_UP	22	0.0585074	0.981625	0.0183751	0.0367502	0.606594	Up
TONKS_TARGETS_OF_RUNX1_RUNX1T1_FUSION_HSC_DN	140	0.0252552	0.981621	0.0183786	0.0367572	0.606594	Up
LE_SKI_TARGETS_UP	7	0.0644123	0.981128	0.0188722	0.0377444	0.606594	Up
SHI_SPARC_TARGETS_DN	8	0.0607045	0.981083	0.0189172	0.0378344	0.606594	Up
REACTOME_ADP_SIGNALLING_THROUGH_P2Y_PURINOCEPTOR_12	13	0.0338985	0.980552	0.0194483	0.0388966	0.606594	Up
HAN_SATB1_TARGETS_DN	288	-0.000589802	0.980167	0.0198332	0.0396664	0.606594	Up
AMIT_SERUM_RESPONSE_40_MCF10A	22	-0.00929985	0.979766	0.0202338	0.0404677	0.606594	Up
JISON_SICKLE_CELL_DISEASE_UP	177	0.0369441	0.979507	0.0204929	0.0409858	0.606594	Up
REN_ALVEOLAR_RHABDOMYOSARCOMA_DN	385	0.0437327	0.979362	0.0206375	0.041275	0.606594	Up
GAUSSMANN_MLL_AF4_FUSION_TARGETS_D_DN	5	0.426557	0.979161	0.0208389	0.0416778	0.606594	Up	Gaussmann et al, Oncogene, 2007
KEGG_HEMATOPOIETIC_CELL_LINEAGE	34	0.017693	0.979015	0.0209849	0.0419699	0.606594	Up
REACTOME_METABOLISM_OF_LIPIDS_AND_LIPOPROTEINS	189	0.00485196	0.978739	0.0212606	0.0425213	0.606594	Up
LIAN_LIPA_TARGETS_6M	30	0.0476519	0.97854	0.0214599	0.0429199	0.606594	Up
JEON_SMAD6_TARGETS_UP	10	0.271619	0.978102	0.0218979	0.0437958	0.606594	Up
REACTOME_PHASE_1_FUNCTIONALIZATION_OF_COMPOUNDS	15	0.0221935	0.977941	0.022059	0.044118	0.606594	Up
TAKEDA_TARGETS_OF_NUP98_HOXA9_FUSION_8D_UP	69	0.0494418	0.977523	0.0224766	0.0449531	0.606594	Up
REACTOME_G_BETA_GAMMA_SIGNALLING_THROUGH_PLC_BETA	12	0.0473195	0.977458	0.0225418	0.0450836	0.606594	Up
TAKEDA_TARGETS_OF_NUP98_HOXA9_FUSION_8D_DN	98	0.0170703	0.977448	0.0225522	0.0451043	0.606594	Up
MULLIGHAN_MLL_SIGNATURE_1_UP	413	0.00946761	0.977359	0.0226406	0.0452811	0.606594	Up
5820315	235	0.00191412	0.977281	0.0227189	0.0454379	0.606594	Up
KEGG_GLYCOLYSIS_GLUCONEOGENESIS	46	0.0229043	0.977236	0.0227641	0.0455282	0.606594	Up
TONKS_TARGETS_OF_RUNX1_RUNX1T1_FUSION_ERYTHROCYTE_UP	103	0.0050758	0.977057	0.022943	0.0458861	0.606594	Up
OLSSON_E2F3_TARGETS_UP	14	0.0462705	0.976421	0.0235793	0.0471586	0.606594	Up
REACTOME_IMMUNOREGULATORY_INTERACTIONS_BETWEEN_A_LYMPHOID_AND_A_NON_LYMPHOID_CELL	40	0.128011	0.976165	0.0238355	0.047671	0.606594	Up
REACTOME_GLYCOLYSIS	26	0.0853284	0.975931	0.0240689	0.0481378	0.606594	Up
GAUSSMANN_MLL_AF4_FUSION_TARGETS_F_UP	52	0.00694176	0.975603	0.0243967	0.0487934	0.606594	Up	Gaussmann et al, Oncogene, 2007
KEGG_STEROID_BIOSYNTHESIS	20	0.244326	0.975461	0.0245393	0.0490786	0.606594	Up
SWEET_KRAS_ONCOGENIC_SIGNATURE	65	-0.00205861	0.97543	0.0245703	0.0491407	0.606594	Up
BIOCARTA_EPO_PATHWAY	22	0.0154182	0.975379	0.0246212	0.0492425	0.606594	Up
GRANDVAUX_IRF3_TARGETS_UP	8	0.326485	0.975033	0.0249672	0.0499344	0.606594	Up
FUJII_YBX1_TARGETS_UP	27	0.0199602	0.974683	0.0253167	0.0506334	0.606594	Up
RODRIGUES_THYROID_CARCINOMA_UP	9	-0.0139562	0.974586	0.0254139	0.0508279	0.606594	Up
BIOCARTA_FREE_PATHWAY	8	0.0853848	0.974545	0.0254552	0.0509105	0.606594	Up
MOOTHA_GLYCOLYSIS	22	0.0989316	0.974253	0.0257473	0.0514946	0.606594	Up
REACTOME_ENDOGENOUS_STEROLS	6	0.153025	0.973996	0.0260044	0.0520087	0.606594	Up
NICK_RESPONSE_TO_PROC_TREATMENT_UP	7	0.0815779	0.973889	0.0261109	0.0522217	0.606594	Up
REACTOME_STEROID_METABOLISM	44	0.104544	0.973877	0.026123	0.052246	0.606594	Up
NAKAYAMA_SOFT_TISSUE_TUMORS_PCA1_DN	16	0.010596	0.973852	0.0261484	0.0522968	0.606594	Up
LIN_MELANOMA_COPY_NUMBER_DN	46	0.00746765	0.973751	0.026249	0.052498	0.606594	Up
BOYAULT_LIVER_CANCER_SUBCLASS_G56_DN	9	0.104447	0.973148	0.0268516	0.0537032	0.606594	Up
FRIDMAN_SENESCENCE_UP	67	0.0275129	0.97299	0.0270102	0.0540204	0.606594	Up
TOMLINS_PROSTATE_CANCER_UP	33	0.0156175	0.972826	0.0271735	0.054347	0.606594	Up
XU_HGF_SIGNALING_NOT_VIA_AKT1_48HR_UP	26	0.00254486	0.972685	0.027315	0.05463	0.606594	Up
TOMLINS_METASTASIS_DN	9	0.0201236	0.972424	0.0275762	0.0551523	0.606594	Up
JAZAG_TGFB1_SIGNALING_VIA_SMAD4_DN	46	0.000271293	0.972255	0.0277449	0.0554898	0.606594	Up
LU_TUMOR_VASCULATURE_UP	14	-0.0479724	0.972113	0.027887	0.0557741	0.606594	Up
LEE_INTRATHYMIC_T_PROGENITOR	6	0.002661	0.971922	0.0280782	0.0561565	0.606594	Up
ACEVEDO_LIVER_CANCER_DN	423	0.00147266	0.971918	0.0280815	0.0561631	0.606594	Up
BIOCARTA_TCYTOTOXIC_PATHWAY	8	0.304599	0.971834	0.0281658	0.0563315	0.606594	Up
KEGG_BIOSYNTHESIS_OF_UNSATURATED_FATTY_ACIDS	22	0.0661837	0.971668	0.0283318	0.0566636	0.606594	Up
KEGG_ARGININE_AND_PROLINE_METABOLISM	31	0.0712885	0.971584	0.0284162	0.0568324	0.606594	Up
TAKEDA_TARGETS_OF_NUP98_HOXA9_FUSION_10D_UP	89	0.0448803	0.9715	0.0284995	0.0569991	0.606594	Up
HUPER_BREAST_BASAL_VS_LUMINAL_UP	17	0.093466	0.971365	0.028635	0.0572699	0.606594	Up
CROMER_METASTASIS_DN	54	0.00906813	0.97131	0.0286901	0.0573802	0.606594	Up
HARRIS_HYPOXIA	54	0.0128999	0.971049	0.0289509	0.0579018	0.606594	Up
REACTOME_INHIBITION_OF_INSULIN_SECRETION_BY_ADRENALINE_NORADRENALINE	18	0.0429317	0.971035	0.028965	0.05793	0.606594	Up
WANG_ESOPHAGUS_CANCER_VS_NORMAL_DN	87	-0.000797816	0.970819	0.0291813	0.0583626	0.606594	Up
BUCKANOVICH_T_LYMPHOCYTE_HOMING_ON_TUMOR_UP	9	0.00804468	0.97081	0.0291904	0.0583808	0.606594	Up
KEGG_ECM_RECEPTOR_INTERACTION	26	0.0438262	0.970808	0.0291916	0.0583831	0.606594	Up
SCHUETZ_BREAST_CANCER_DUCTAL_INVASIVE_UP	172	0.0545765	0.970672	0.0293283	0.0586565	0.606594	Up
LUI_THYROID_CANCER_CLUSTER_5	9	-0.085251	0.970644	0.0293559	0.0587119	0.606594	Up
ROSS_AML_WITH_AML1_ETO_FUSION	64	0.0171109	0.970517	0.029483	0.0589659	0.606594	Up
MOROSETTI_FACIOSCAPULOHUMERAL_MUSCULAR_DISTROPHY_UP	9	0.00952864	0.970403	0.0295971	0.0591943	0.606594	Up
BERENJENO_ROCK_SIGNALING_NOT_VIA_RHOA_UP	21	0.0696283	0.97038	0.0296196	0.0592391	0.606594	Up
ZHANG_ANTIVIRAL_RESPONSE_TO_RIBAVIRIN_UP	19	0.044005	0.970191	0.0298093	0.0596185	0.606594	Up
PASTURAL_RIZ1_TARGETS_DN	3	-0.245343	0.970012	0.0299875	0.0599751	0.606594	Up
REACTOME_P130CAS_LINKAGE_TO_MAPK_SIGNALING_FOR_INTEGRINS	9	-0.0385169	0.969935	0.0300646	0.0601293	0.606594	Up
WAMUNYOKOLI_OVARIAN_CANCER_LMP_UP	245	0.00688944	0.969565	0.030435	0.06087	0.606594	Up
HOSHIDA_LIVER_CANCER_SUBCLASS_S3	179	0.0133908	0.969269	0.030731	0.0614621	0.606594	Up
HEIDENBLAD_AMPLICON_12P11_12_UP	12	-0.0110485	0.969216	0.0307842	0.0615684	0.606594	Up
BIOCARTA_BLYMPHOCYTE_PATHWAY	13	0.116361	0.969128	0.0308716	0.0617432	0.606594	Up
APPEL_IMATINIB_RESPONSE	34	0.19507	0.96899	0.0310104	0.0620208	0.606594	Up
RAY_ALZHEIMERS_DISEASE	1	NA	0.968837	0.0311631	0.0623262	0.606594	Up
SMID_BREAST_CANCER_ERBB2_UP	98	-0.000831162	0.968805	0.0311948	0.0623895	0.606594	Up
YANAGISAWA_LUNG_CANCER_RECURRENCE	5	-0.08239	0.96851	0.0314898	0.0629796	0.606594	Up
KEGG_FOLATE_BIOSYNTHESIS	11	0.0535687	0.968338	0.0316623	0.0633246	0.606594	Up
RICKMAN_TUMOR_DIFFERENTIATED_WELL_VS_POORLY_DN	289	0.00497903	0.968274	0.0317259	0.0634518	0.606594	Up
HSIAO_LIVER_SPECIFIC_GENES	114	0.0265035	0.967982	0.0320184	0.0640368	0.606594	Up
KERLEY_RESPONSE_TO_CISPLATIN_UP	33	0.0232991	0.967491	0.0325088	0.0650175	0.606594	Up
BAELDE_DIABETIC_NEPHROPATHY_UP	22	0.0321946	0.967355	0.0326454	0.0652908	0.606594	Up
CHIARADONNA_NEOPLASTIC_TRANSFORMATION_CDC25_DN	154	0.0138054	0.967306	0.0326943	0.0653887	0.606594	Up
SAGIV_CD24_TARGETS_DN	42	0.0297756	0.966913	0.0330866	0.0661732	0.606594	Up
RUTELLA_RESPONSE_TO_CSF2RB_AND_IL4_DN	254	0.00317456	0.96681	0.0331897	0.0663793	0.606594	Up
BROWNE_HCMV_INFECTION_48HR_DN	383	0.000856887	0.966658	0.0333423	0.0666847	0.606594	Up
DORN_ADENOVIRUS_INFECTION_48HR_DN	24	0.00757707	0.966305	0.0336952	0.0673905	0.606594	Up
BIOCARTA_THELPER_PATHWAY	9	0.365354	0.966242	0.0337576	0.0675152	0.606594	Up
DOANE_BREAST_CANCER_ESR1_UP	39	-0.0110083	0.966142	0.0338576	0.0677152	0.606594	Up
REACTOME_INTEGRIN_CELL_SURFACE_INTERACTIONS	38	0.0514408	0.966079	0.0339212	0.0678425	0.606594	Up
REACTOME_CYTOCHROME_P450_ARRANGED_BY_SUBSTRATE_TYPE	10	0.0481686	0.965991	0.0340095	0.068019	0.606594	Up
LI_CISPLATIN_RESISTANCE_UP	17	0.000536732	0.965903	0.0340967	0.0681935	0.606594	Up
ROSS_ACUTE_MYELOID_LEUKEMIA_CBF	72	0.0177194	0.965895	0.0341049	0.0682097	0.606594	Up
AKL_HTLV1_INFECTION_UP	30	-0.0103552	0.965753	0.0342466	0.0684932	0.606594	Up
SMID_BREAST_CANCER_LUMINAL_B_DN	279	0.00261876	0.965663	0.0343374	0.0686748	0.606594	Up
LEE_LIVER_CANCER_HEPATOBLAST	9	0.105902	0.965583	0.0344167	0.0688333	0.606594	Up
FLECHNER_BIOPSY_KIDNEY_TRANSPLANT_REJECTED_VS_OK_UP	89	0.0525903	0.965532	0.0344684	0.0689369	0.606594	Up
CHIBA_RESPONSE_TO_TSA_UP	25	0.0274674	0.965443	0.0345574	0.0691149	0.606594	Up
MCLACHLAN_DENTAL_CARIES_UP	146	0.0671503	0.965351	0.0346491	0.0692981	0.606594	Up
AMIT_SERUM_RESPONSE_240_MCF10A	40	0.00442446	0.96522	0.0347799	0.0695598	0.606594	Up
REACTOME_PHASE_1_FUNCTIONALIZATION	3	0.0762818	0.965075	0.0349252	0.0698505	0.606594	Up
GERY_CEBP_TARGETS	84	0.0208214	0.96485	0.0351502	0.0703005	0.606594	Up
KEGG_HYPERTROPHIC_CARDIOMYOPATHY_HCM	41	0.0128509	0.964845	0.0351546	0.0703091	0.606594	Up
ZHU_CMV_24_HR_DN	32	0.0310353	0.96482	0.03518	0.0703599	0.606594	Up
RODWELL_AGING_KIDNEY_NO_BLOOD_UP	79	0.00418642	0.964542	0.0354584	0.0709169	0.606594	Up
WOO_LIVER_CANCER_RECURRENCE_DN	61	0.0512718	0.964501	0.0354987	0.0709974	0.606594	Up
REACTOME_INTEGRIN_ALPHAIIBBETA3_SIGNALING	15	0.0203002	0.964003	0.0359969	0.0719937	0.606594	Up
MILI_PSEUDOPODIA_HAPTOTAXIS_DN	695	0.0203564	0.963954	0.0360457	0.0720913	0.606594	Up
DORN_ADENOVIRUS_INFECTION_32HR_DN	25	-0.000707836	0.96357	0.0364298	0.0728596	0.606594	Up
MCLACHLAN_DENTAL_CARIES_DN	159	0.0480915	0.96352	0.0364802	0.0729604	0.606594	Up
KEGG_BETA_ALANINE_METABOLISM	16	0.0997681	0.96323	0.0367701	0.0735403	0.606594	Up
ST_PAC1_RECEPTOR_PATHWAY	10	0.00761322	0.963217	0.0367825	0.0735651	0.606594	Up
KRIGE_AMINO_ACID_DEPRIVATION	27	0.0484206	0.963056	0.0369436	0.0738872	0.606594	Up
SCHLESINGER_METHYLATED_IN_COLON_CANCER	3	0.495587	0.962589	0.0374109	0.0748217	0.606594	Up
AMIT_EGF_RESPONSE_20_HELA	9	0.091738	0.962509	0.0374907	0.0749814	0.606594	Up
GILDEA_METASTASIS	14	0.0666671	0.962482	0.0375178	0.0750357	0.606594	Up
RADMACHER_AML_PROGNOSIS	49	-0.00120587	0.962316	0.0376839	0.0753678	0.606594	Up
AMIT_EGF_RESPONSE_60_HELA	39	0.0268066	0.962281	0.0377188	0.0754376	0.606594	Up
FRIDMAN_IMMORTALIZATION_DN	23	0.0148611	0.962112	0.0378881	0.0757762	0.606594	Up
GRABARCZYK_BCL11B_TARGETS_UP	59	0.00785378	0.961988	0.0380125	0.076025	0.606594	Up
ROSS_AML_WITH_CBFB_MYH11_FUSION	38	0.0725694	0.96189	0.0381101	0.0762203	0.606594	Up
BIOCARTA_IL17_PATHWAY	3	0.536346	0.961803	0.0381969	0.0763938	0.606594	Up
ZHAN_MULTIPLE_MYELOMA_HP_DN	51	0.0178255	0.961674	0.0383257	0.0766514	0.606594	Up
LI_WILMS_TUMOR_VS_FETAL_KIDNEY_1_UP	158	0.0430327	0.961277	0.0387226	0.0774451	0.606594	Up
BIOCARTA_GATA3_PATHWAY	11	0.0114251	0.960695	0.0393048	0.0786096	0.606594	Up
KEGG_N_GLYCAN_BIOSYNTHESIS	63	0.0458962	0.960526	0.0394737	0.0789474	0.606594	Up
BUCKANOVICH_T_LYMPHOCYTE_HOMING_ON_TUMOR_DN	8	-0.0404523	0.960404	0.039596	0.0791919	0.606594	Up
MCCABE_HOXC6_TARGETS_UP	6	-0.017111	0.96013	0.0398702	0.0797404	0.606594	Up
BOWIE_RESPONSE_TO_TAMOXIFEN	14	0.546726	0.960036	0.0399643	0.0799285	0.606594	Up
BIOCARTA_TH1TH2_PATHWAY	11	0.0297726	0.959895	0.0401053	0.0802107	0.606594	Up
PIEPOLI_LGI1_TARGETS_DN	6	0.186209	0.959761	0.0402391	0.0804781	0.606594	Up
SATO_SILENCED_BY_METHYLATION_IN_PANCREATIC_CANCER_1	210	0.00603554	0.95976	0.0402398	0.0804797	0.606594	Up
DAVIES_MULTIPLE_MYELOMA_VS_MGUS_UP	4	-0.0311228	0.959659	0.0403408	0.0806815	0.606594	Up
COWLING_MYCN_TARGETS	17	-0.000216294	0.959372	0.0406281	0.0812561	0.606594	Up
NIELSEN_LEIOMYOSARCOMA_UP	2	0.551165	0.959306	0.0406936	0.0813872	0.606594	Up
GU_PDEF_TARGETS_DN	13	-0.0392255	0.959156	0.0408442	0.0816884	0.606594	Up
REACTOME_CHOLESTEROL_BIOSYNTHESIS	23	0.181889	0.958879	0.0411207	0.0822415	0.606594	Up
MARTORIATI_MDM4_TARGETS_NEUROEPITHELIUM_UP	100	0.0305598	0.958855	0.0411448	0.0822896	0.606594	Up
TRAYNOR_RETT_SYNDROM_UP	11	-0.0258317	0.958645	0.0413547	0.0827095	0.606594	Up
SMITH_TERT_TARGETS_DN	61	0.00778963	0.958369	0.0416311	0.0832621	0.606594	Up
HAHTOLA_SEZARY_SYNDROM_DN	23	0.1128	0.958036	0.041964	0.083928	0.606594	Up
BARIS_THYROID_CANCER_DN	58	-0.00614222	0.958025	0.0419747	0.0839494	0.606594	Up
YAGI_AML_FAB_MARKERS	171	0.00340324	0.957618	0.0423816	0.0847633	0.606594	Up
RICKMAN_HEAD_AND_NECK_CANCER_B	3	-0.10618	0.957545	0.0424547	0.0849095	0.606594	Up
KIM_RESPONSE_TO_TSA_AND_DECITABINE_UP	66	-0.00735739	0.957253	0.0427465	0.085493	0.606594	Up
KRASNOSELSKAYA_ILF3_TARGETS_UP	15	0.378702	0.957251	0.0427492	0.0854985	0.606594	Up
KEGG_VIRAL_MYOCARDITIS	57	0.0829133	0.957223	0.0427767	0.0855534	0.606594	Up
BOQUEST_STEM_CELL_CULTURED_VS_FRESH_UP	1	NA	0.956982	0.0430176	0.0860353	0.606594	Up
DAUER_STAT3_TARGETS_UP	24	0.0954652	0.956947	0.0430532	0.0861063	0.606594	Up
NAKAYAMA_SOFT_TISSUE_TUMORS_PCA2_DN	7	0.018724	0.956748	0.0432522	0.0865043	0.606594	Up
CHIN_BREAST_CANCER_COPY_NUMBER_UP	19	0.0249621	0.956708	0.0432919	0.0865839	0.606594	Up
GRAHAM_CML_QUIESCENT_VS_CML_DIVIDING_UP	7	0.185527	0.956692	0.0433082	0.0866163	0.606594	Up
VETTER_TARGETS_OF_PRKCA_AND_ETS1_DN	11	-0.0385163	0.956378	0.0436222	0.0872445	0.606594	Up
REACTOME_CELL_JUNCTION_ORGANIZATION	41	0.0183531	0.956192	0.0438082	0.0876164	0.606594	Up
BONOME_OVARIAN_CANCER_POOR_SURVIVAL_DN	35	0.0122661	0.955958	0.0440424	0.0880849	0.606594	Up
REACTOME_SEMAPHORIN_INTERACTIONS	52	0.0235333	0.955829	0.0441714	0.0883429	0.606594	Up
ST_MYOCYTE_AD_PATHWAY	21	0.121346	0.955769	0.0442315	0.0884629	0.606594	Up
CHIARADONNA_NEOPLASTIC_TRANSFORMATION_KRAS_CDC25_DN	26	0.106008	0.955724	0.0442757	0.0885514	0.606594	Up
ICHIBA_GRAFT_VERSUS_HOST_DISEASE_35D_UP	104	0.0868373	0.955709	0.0442907	0.0885814	0.606594	Up
ONDER_CDH1_SIGNALING_VIA_CTNNB1	34	0.0203809	0.9556	0.0444001	0.0888003	0.606594	Up
BOWIE_RESPONSE_TO_EXTRACELLULAR_MATRIX	8	0.623395	0.955389	0.0446113	0.0892226	0.606594	Up
BASSO_HAIRY_CELL_LEUKEMIA_DN	52	0.0390894	0.955326	0.0446738	0.0893476	0.606594	Up
SOUCEK_MYC_TARGETS	2	0.637826	0.955221	0.0447792	0.0895583	0.606594	Up
STEARMAN_TUMOR_FIELD_EFFECT_UP	19	0.16189	0.954979	0.0450206	0.0900413	0.606594	Up
AMUNDSON_POOR_SURVIVAL_AFTER_GAMMA_RADIATION_8G	87	0.013338	0.954934	0.0450664	0.0901328	0.606594	Up
CERVERA_SDHB_TARGETS_1_UP	39	0.0374246	0.95483	0.0451697	0.0903394	0.606594	Up
JI_RESPONSE_TO_FSH_UP	55	0.0140267	0.954618	0.0453821	0.0907642	0.606594	Up
PASQUALUCCI_LYMPHOMA_BY_GC_STAGE_UP	218	0.0851947	0.954502	0.0454982	0.0909964	0.606594	Up
MULLIGHAN_MLL_SIGNATURE_2_UP	457	0.0129202	0.95443	0.0455701	0.0911401	0.606594	Up
REACTOME_PYRIMIDINE_CATABOLISM	8	0.220188	0.953242	0.0467585	0.093517	0.606594	Up
GUENTHER_GROWTH_SPHERICAL_VS_ADHERENT_DN	21	0.092203	0.953238	0.0467618	0.0935236	0.606594	Up
NAM_FXYD5_TARGETS_DN	20	-0.00348747	0.953223	0.0467772	0.0935544	0.606594	Up
SUNG_METASTASIS_STROMA_UP	62	-0.00849985	0.953197	0.0468034	0.0936067	0.606594	Up
MARKS_HDAC_TARGETS_DN	19	0.023367	0.953097	0.0469028	0.0938057	0.606594	Up
NOJIMA_SFRP2_TARGETS_DN	25	0.0647928	0.952417	0.0475828	0.0951657	0.606594	Up
SU_KIDNEY	2	0.0884548	0.952415	0.047585	0.09517	0.606594	Up
KAAB_FAILED_HEART_VENTRICLE_DN	48	-0.00553516	0.952288	0.047712	0.0954241	0.606594	Up
REACTOME_CRMPS_IN_SEMA3A_SIGNALING	11	0.0255104	0.952176	0.0478237	0.0956474	0.606594	Up
KEGG_GLYCOSPHINGOLIPID_BIOSYNTHESIS_GANGLIO_SERIES	14	0.161121	0.952126	0.0478742	0.0957484	0.606594	Up
VARELA_ZMPSTE24_TARGETS_UP	43	0.00175301	0.952114	0.0478865	0.0957729	0.606594	Up
NIKOLSKY_BREAST_CANCER_20Q11_AMPLICON	39	-0.0112993	0.951818	0.0481817	0.0963634	0.606594	Up
MURATA_VIRULENCE_OF_H_PILORI	13	0.0439743	0.951785	0.0482148	0.0964295	0.606594	Up
LINDSTEDT_DENDRITIC_CELL_MATURATION_D	49	-0.00164143	0.951694	0.0483061	0.0966122	0.606594	Up
YANG_BREAST_CANCER_ESR1_UP	12	0.128903	0.951567	0.0484334	0.0968668	0.606594	Up
JAEGER_METASTASIS_DN	102	0.00553089	0.951454	0.048546	0.0970921	0.606594	Up
ZHANG_INTERFERON_RESPONSE	24	0.35644	0.951414	0.0485859	0.0971719	0.606594	Up
OUELLET_CULTURED_OVARIAN_CANCER_INVASIVE_VS_LMP_DN	16	0.00742582	0.951386	0.0486142	0.0972283	0.606594	Up
SUZUKI_AMPLIFIED_IN_ORAL_CANCER	12	0.00270445	0.951367	0.0486328	0.0972656	0.606594	Up
NIELSEN_SCHWANNOMA_DN	1	NA	0.951274	0.0487256	0.0974511	0.606594	Up
KEGG_GLYCOSAMINOGLYCAN_DEGRADATION	18	0.094402	0.951193	0.0488075	0.0976149	0.606594	Up
ZHAN_LATE_DIFFERENTIATION_GENES_UP	23	0.00356272	0.951124	0.0488763	0.0977526	0.606594	Up
DACOSTA_ERCC3_ALLELE_XPCS_VS_TTD_DN	13	0.0533059	0.951057	0.0489427	0.0978854	0.606594	Up
ST_STAT3_PATHWAY	11	0.153047	0.950739	0.0492607	0.0985215	0.606594	Up
BOYLAN_MULTIPLE_MYELOMA_D_CLUSTER_UP	27	-5.47524e-05	0.950732	0.0492679	0.0985357	0.606594	Up
BIOCARTA_FEEDER_PATHWAY	10	0.0529886	0.950701	0.0492985	0.0985971	0.606594	Up
NIKOLSKY_BREAST_CANCER_22Q13_AMPLICON	14	-0.0104621	0.950679	0.049321	0.0986419	0.606594	Up
TARTE_PLASMA_CELL_VS_B_LYMPHOCYTE_UP	80	0.0718773	0.950398	0.0496024	0.0992049	0.606594	Up
DUNNE_TARGETS_OF_AML1_MTG8_FUSION_UP	49	0.182345	0.950303	0.0496966	0.0993932	0.606594	Up
MISSIAGLIA_REGULATED_BY_METHYLATION_UP	84	0.0258093	0.950129	0.0498713	0.0997426	0.606594	Up
MORI_SMALL_PRE_BII_LYMPHOCYTE_UP	78	0.0516071	0.00109263	0.998907	0.00218526	0.606594	Down
NAKAYAMA_FRA2_TARGETS	41	-0.00327037	0.00133101	0.998669	0.00266203	0.606594	Down
KOBAYASHI_EGFR_SIGNALING_6HR_UP	11	0.0881244	0.00305757	0.996942	0.00611514	0.606594	Down
SU_THYMUS	14	0.0289111	0.00361444	0.996386	0.00722888	0.606594	Down
BIOCARTA_PGC1A_PATHWAY	29	-0.00775807	0.00462541	0.995375	0.00925082	0.606594	Down
KEGG_VASCULAR_SMOOTH_MUSCLE_CONTRACTION	84	0.00231325	0.00553609	0.994464	0.0110722	0.606594	Down
KEGG_MAPK_SIGNALING_PATHWAY	227	-2.01226e-05	0.00574592	0.994254	0.0114918	0.606594	Down
BIOCARTA_ACE2_PATHWAY	1	NA	0.00593336	0.994067	0.0118667	0.606594	Down
PIEPOLI_LGI1_TARGETS_UP	8	0.00347744	0.00697257	0.993027	0.0139451	0.606594	Down
LIU_VMYB_TARGETS_UP	125	0.0144188	0.00770099	0.992299	0.015402	0.606594	Down
KEGG_GNRH_SIGNALING_PATHWAY	91	0.0108418	0.00824208	0.991758	0.0164842	0.606594	Down
SMID_BREAST_CANCER_RELAPSE_IN_LUNG_DN	13	0.0129721	0.00924272	0.990757	0.0184854	0.606594	Down
BIOCARTA_NOS1_PATHWAY	17	0.0123788	0.0100171	0.989983	0.0200343	0.606594	Down
BIOCARTA_CBL_PATHWAY	11	0.0537276	0.0111165	0.988883	0.022233	0.606594	Down
IIZUKA_LIVER_CANCER_PROGRESSION_L0_L1_UP	9	0.0719062	0.011868	0.988132	0.023736	0.606594	Down
CHENG_IMPRINTED_BY_ESTRADIOL	81	0.00801928	0.0119111	0.988089	0.0238222	0.606594	Down
ST_JNK_MAPK_PATHWAY	42	0.0250997	0.0120096	0.98799	0.0240193	0.606594	Down
REACTOME_METABOLISM_OF_NITRIC_OXIDE	15	0.0121975	0.0121351	0.987865	0.0242701	0.606594	Down
BUYTAERT_PHOTODYNAMIC_THERAPY_STRESS_UP	816	0.0148028	0.0122343	0.987766	0.0244686	0.606594	Down
BIOCARTA_HCMV_PATHWAY	29	0.0365735	0.0122829	0.987717	0.0245658	0.606594	Down
CHANG_POU5F1_TARGETS_UP	8	0.0857813	0.0125506	0.987449	0.0251013	0.606594	Down
BASAKI_YBX1_TARGETS_DN	314	0.000975042	0.012998	0.987002	0.0259959	0.606594	Down
PASTURAL_RIZ1_TARGETS_UP	2	0.431912	0.0130222	0.986978	0.0260443	0.606594	Down
HADDAD_B_LYMPHOCYTE_PROGENITOR	277	0.0310221	0.0131838	0.986816	0.0263677	0.606594	Down
BIOCARTA_SRCRPTP_PATHWAY	17	0.15518	0.0132843	0.986716	0.0265686	0.606594	Down
TURASHVILI_BREAST_LOBULAR_CARCINOMA_VS_DUCTAL_NORMAL_UP	34	0.00516933	0.0147431	0.985257	0.0294861	0.606594	Down
CROMER_METASTASIS_UP	66	0.0215635	0.0152102	0.98479	0.0304204	0.606594	Down
SCIAN_INVERSED_TARGETS_OF_TP53_AND_TP73_DN	34	0.0141416	0.0162072	0.983793	0.0324144	0.606594	Down
BIOCARTA_RAC1_PATHWAY	23	0.030664	0.0163021	0.983698	0.0326043	0.606594	Down
SPIELMAN_LYMPHOBLAST_EUROPEAN_VS_ASIAN_2FC_DN	8	-0.0625571	0.016309	0.983691	0.032618	0.606594	Down
KEGG_LONG_TERM_POTENTIATION	79	0.0112793	0.0165658	0.983434	0.0331315	0.606594	Down
TURJANSKI_MAPK1_AND_MAPK2_TARGETS	16	-0.00622444	0.0166048	0.983395	0.0332096	0.606594	Down
YEGNASUBRAMANIAN_PROSTATE_CANCER	63	0.00517494	0.0168333	0.983167	0.0336665	0.606594	Down
HEIDENBLAD_AMPLICON_8Q24_UP	22	0.0298833	0.0170872	0.982913	0.0341745	0.606594	Down
RICKMAN_HEAD_AND_NECK_CANCER_A	25	0.0551922	0.0173783	0.982622	0.0347565	0.606594	Down
GARGALOVIC_RESPONSE_TO_OXIDIZED_PHOSPHOLIPIDS_LIGHTYELLOW_UP	10	0.025996	0.0196801	0.98032	0.0393602	0.606594	Down
KEGG_FC_EPSILON_RI_SIGNALING_PATHWAY	74	0.0217306	0.0197263	0.980274	0.0394525	0.606594	Down
GARGALOVIC_RESPONSE_TO_OXIDIZED_PHOSPHOLIPIDS_MAGENTA_DN	15	0.122986	0.0199928	0.980007	0.0399856	0.606594	Down
DING_LUNG_CANCER_MUTATED_FREQUENTLY	15	-0.0263591	0.0206449	0.979355	0.0412897	0.606594	Down
MMS_MOUSE_LYMPH_HIGH_4HRS_UP	43	0.0945155	0.0209659	0.979034	0.0419319	0.606594	Down
KEGG_GAP_JUNCTION	75	-0.00294153	0.0217434	0.978257	0.0434869	0.606594	Down
OSMAN_BLADDER_CANCER_DN	455	0.015429	0.0218176	0.978182	0.0436352	0.606594	Down
BLALOCK_ALZHEIMERS_DISEASE_INCIPIENT_UP	398	0.0149971	0.021863	0.978137	0.043726	0.606594	Down
BIOCARTA_TEL_PATHWAY	22	0.0561401	0.0220241	0.977976	0.0440482	0.606594	Down
WANG_CISPLATIN_RESPONSE_AND_XPC_DN	147	0.00092291	0.0220945	0.977905	0.044189	0.606594	Down
BYSTRYKH_HEMATOPOIESIS_STEM_CELL_FLI1	5	0.0337385	0.0226641	0.977336	0.0453281	0.606594	Down
CREIGHTON_ENDOCRINE_THERAPY_RESISTANCE_5	362	0.00440445	0.0228557	0.977144	0.0457115	0.606594	Down
BIOCARTA_AKT_PATHWAY	28	0.00727427	0.0230036	0.976996	0.0460072	0.606594	Down
ROY_WOUND_BLOOD_VESSEL_DN	5	0.137128	0.0239318	0.976068	0.0478636	0.606594	Down
BIOCARTA_GCR_PATHWAY	24	0.0576378	0.0242824	0.975718	0.0485648	0.606594	Down
HOEBEKE_LYMPHOID_STEM_CELL_UP	83	0.00848928	0.0245634	0.975437	0.0491267	0.606594	Down
KORKOLA_EMBRYONAL_CARCINOMA_DN	9	0.0322836	0.0247274	0.975273	0.0494547	0.606594	Down
KORKOLA_SEMINOMA_DN	9	0.0322836	0.0247274	0.975273	0.0494547	0.606594	Down
KIM_MYCN_AMPLIFICATION_TARGETS_DN	68	0.0119305	0.0249392	0.975061	0.0498785	0.606594	Down
LAIHO_COLORECTAL_CANCER_SERRATED_DN	85	0.0306069	0.0249411	0.975059	0.0498823	0.606594	Down
REACTOME_TRKA_SIGNALLING_FROM_THE_PLASMA_MEMBRANE	106	0.00341698	0.0252212	0.974779	0.0504424	0.606594	Down
JAEGER_METASTASIS_UP	43	0.179228	0.0254913	0.974509	0.0509825	0.606594	Down
STREICHER_LSM1_TARGETS_UP	39	0.0292342	0.0256173	0.974383	0.0512347	0.606594	Down
LAU_APOPTOSIS_CDKN2A_DN	6	-0.0126851	0.0258789	0.974121	0.0517579	0.606594	Down
REACTOME_CAM_PATHWAY	17	0.016371	0.0261592	0.973841	0.0523184	0.606594	Down
WILLIAMS_ESR1_TARGETS_DN	3	-0.154236	0.0264153	0.973585	0.0528306	0.606594	Down
NIKOLSKY_BREAST_CANCER_19Q13.1_AMPLICON	8	0.0324185	0.0265439	0.973456	0.0530878	0.606594	Down
MARZEC_IL2_SIGNALING_DN	45	0.0186752	0.0268971	0.973103	0.0537941	0.606594	Down
KEGG_HEDGEHOG_SIGNALING_PATHWAY	27	-0.00495916	0.0271349	0.972865	0.0542698	0.606594	Down
BIOCARTA_MYOSIN_PATHWAY	31	-0.021009	0.0273163	0.972684	0.0546326	0.606594	Down
MCCLUNG_CREB1_TARGETS_DN	41	-0.00601122	0.0292797	0.97072	0.0585595	0.606594	Down
REACTOME_CREB_PHOSPHORYLATION_THROUGH_THE_ACTIVATION_OF_CAMKII	14	0.175344	0.0293593	0.970641	0.0587186	0.606594	Down
BRUECKNER_TARGETS_OF_MIRLET7A3_UP	61	-0.00296614	0.0296774	0.970323	0.0593548	0.606594	Down
MOREAUX_B_LYMPHOCYTE_MATURATION_BY_TACI_UP	53	0.00268113	0.0296789	0.970321	0.0593578	0.606594	Down
ST_B_CELL_ANTIGEN_RECEPTOR	49	0.00939906	0.0297457	0.970254	0.0594914	0.606594	Down
KEGG_MELANOGENESIS	79	0.0146149	0.0298974	0.970103	0.0597947	0.606594	Down
KORKOLA_YOLK_SAC_TUMOR_DN	13	0.0238217	0.0299295	0.97007	0.0598591	0.606594	Down
STEGMEIER_PRE-MITOTIC_CELL_CYCLE_REGULATORS	18	0.119563	0.0299989	0.970001	0.0599977	0.606594	Down
DAVICIONI_PAX_FOXO1_SIGNATURE_IN_ARMS_UP	39	-0.00397825	0.030166	0.969834	0.060332	0.606594	Down
HOFFMANN_PRE_BI_TO_LARGE_PRE_BII_LYMPHOCYTE_UP	20	0.189683	0.0302698	0.96973	0.0605397	0.606594	Down
BARRIER_COLON_CANCER_RECURRENCE_UP	49	0.0126207	0.0304779	0.969522	0.0609557	0.606594	Down
OUELLET_CULTURED_OVARIAN_CANCER_INVASIVE_VS_LMP_UP	68	0.0224638	0.0304938	0.969506	0.0609875	0.606594	Down
BREUHAHN_GROWTH_FACTOR_SIGNALING_IN_LIVER_CANCER	8	-0.062787	0.0305288	0.969471	0.0610576	0.606594	Down
LEE_LIVER_CANCER_MYC_DN	25	0.0140062	0.0308201	0.96918	0.0616402	0.606594	Down
GRESHOCK_CANCER_COPY_NUMBER_UP	354	0.0307004	0.0308653	0.969135	0.0617307	0.606594	Down
GRESHOCK_CANCER_COPY_NUMBER_DN	364	0.0328893	0.0312213	0.968779	0.0624427	0.606594	Down
RODRIGUES_THYROID_CARCINOMA_ANAPLASTIC_DN	406	0.00279136	0.0313675	0.968632	0.062735	0.606594	Down
VANHARANTA_UTERINE_FIBROID_WITH_7Q_DELETION_DN	33	0.00177739	0.0317425	0.968257	0.063485	0.606594	Down
DING_LUNG_CANCER_MUTATED_SIGNIFICANTLY	23	0.0765344	0.0319602	0.96804	0.0639204	0.606594	Down
REACTOME_PHOSPHORYLATION_OF_THE_APC	17	0.194727	0.0320301	0.96797	0.0640602	0.606594	Down
KEGG_INSULIN_SIGNALING_PATHWAY	133	0.00734031	0.0321776	0.967822	0.0643551	0.606594	Down
THUM_MIR21_TARGETS_HEART_DISEASE_DN	5	0.077207	0.0323522	0.967648	0.0647044	0.606594	Down
STEARMAN_LUNG_CANCER_EARLY_VS_LATE_UP	126	0.0294509	0.0328037	0.967196	0.0656075	0.606594	Down
BIOCARTA_CTCF_PATHWAY	33	0.0369761	0.0333624	0.966638	0.0667247	0.606594	Down
OSMAN_BLADDER_CANCER_UP	463	0.0199956	0.0334584	0.966542	0.0669167	0.606594	Down
REACTOME_SIGNALLING_BY_NGF	234	0.000156831	0.033475	0.966525	0.0669501	0.606594	Down
RICKMAN_TUMOR_DIFFERENTIATED_WELL_VS_MODERATELY_UP	102	-0.00345165	0.0336202	0.96638	0.0672405	0.606594	Down
SHEN_SMARCA2_TARGETS_UP	509	0.0477437	0.0336577	0.966342	0.0673154	0.606594	Down
WATANABE_COLON_CANCER_MSI_VS_MSS_DN	30	0.000477884	0.0336584	0.966342	0.0673168	0.606594	Down
SHAFFER_IRF4_TARGETS_IN_MYELOMA_VS_MATURE_B_LYMPHOCYTE	112	0.00547547	0.0338693	0.966131	0.0677385	0.606594	Down
DAZARD_RESPONSE_TO_UV_NHEK_DN	308	0.0904377	0.0340592	0.965941	0.0681183	0.606594	Down
LIN_NPAS4_TARGETS_DN	47	-0.00280108	0.0345208	0.965479	0.0690416	0.606594	Down
BROWNE_HCMV_INFECTION_6HR_DN	163	0.0398587	0.0345612	0.965439	0.0691224	0.606594	Down
KORKOLA_TERATOMA_DN	8	0.0798293	0.03467	0.96533	0.0693399	0.606594	Down
DONATO_CELL_CYCLE_TRETINOIN	6	0.0294862	0.0352373	0.964763	0.0704746	0.606594	Down
BIOCARTA_FCER1_PATHWAY	57	0.0247394	0.0353303	0.96467	0.0706606	0.606594	Down
MORI_MATURE_B_LYMPHOCYTE_DN	87	0.219971	0.0357294	0.964271	0.0714587	0.606594	Down
FIRESTEIN_CTNNB1_PATHWAY	38	0.0116028	0.0358753	0.964125	0.0717505	0.606594	Down
ZEMBUTSU_SENSITIVITY_TO_DOXORUBICIN	4	0.215104	0.0359719	0.964028	0.0719438	0.606594	Down
REACTOME_APCDC20_MEDIATED_DEGRADATION_OF_CYCLIN_B	21	0.193807	0.0361036	0.963896	0.0722071	0.606594	Down
BLALOCK_ALZHEIMERS_DISEASE_UP	1706	0.0153442	0.036274	0.963726	0.072548	0.606594	Down
BIOCARTA_STATHMIN_PATHWAY	17	0.0148662	0.0367396	0.96326	0.0734792	0.606594	Down
KENNY_CTNNB1_TARGETS_DN	38	0.0126924	0.0375438	0.962456	0.0750875	0.606594	Down
WENDT_COHESIN_TARGETS_UP	31	-0.00205113	0.0376544	0.962346	0.0753088	0.606594	Down
GALE_APL_WITH_FLT3_MUTATED_UP	70	0.012311	0.0377149	0.962285	0.0754298	0.606594	Down
FINETTI_BREAST_CANCERS_KINOME_GRAY	17	0.0537503	0.037941	0.962059	0.075882	0.606594	Down
RODWELL_AGING_KIDNEY_DN	91	0.0389672	0.0382047	0.961795	0.0764093	0.606594	Down
REACTOME_INACTIVATION_OF_APC_VIA_DIRECT_INHIBITION_OF_THE_APCOMPLEX	22	0.266606	0.0382159	0.961784	0.0764319	0.606594	Down
BIOCARTA_HDAC_PATHWAY	38	-0.00461093	0.0383283	0.961672	0.0766566	0.606594	Down
HASLINGER_B_CLL_WITH_13Q14_DELETION	14	0.0937054	0.0387447	0.961255	0.0774894	0.606594	Down
MANN_RESPONSE_TO_AMIFOSTINE_DN	13	0.157757	0.0388131	0.961187	0.0776263	0.606594	Down
WILCOX_PRESPONSE_TO_ROGESTERONE_UP	156	0.0494448	0.0388973	0.961103	0.0777946	0.606594	Down
HOSHIDA_LIVER_CANCER_LATE_RECURRENCE_UP	50	0.0163755	0.0393362	0.960664	0.0786725	0.606594	Down
DEURIG_T_CELL_PROLYMPHOCYTIC_LEUKEMIA_DN	309	0.00310841	0.0393914	0.960609	0.0787828	0.606594	Down
SIG_CHEMOTAXIS	47	0.0341173	0.0397471	0.960253	0.0794941	0.606594	Down
MULLIGHAN_NPM1_MUTATED_SIGNATURE_2_UP	127	0.0715573	0.0397902	0.96021	0.0795804	0.606594	Down
RIZ_ERYTHROID_DIFFERENTIATION_HBZ	35	0.22312	0.0405717	0.959428	0.0811434	0.606594	Down
BIOCARTA_BCR_PATHWAY	48	0.0339593	0.0407589	0.959241	0.0815179	0.606594	Down
KEGG_VEGF_SIGNALING_PATHWAY	79	0.0109049	0.0407971	0.959203	0.0815943	0.606594	Down
KEGG_UBIQUITIN_MEDIATED_PROTEOLYSIS	197	0.0886739	0.0413201	0.95868	0.0826402	0.606594	Down
JAERVINEN_AMPLIFIED_IN_LARYNGEAL_CANCER	42	0.0575809	0.0414197	0.95858	0.0828393	0.606594	Down
BIOCARTA_TGFB_PATHWAY	23	-0.0148834	0.0417738	0.958226	0.0835476	0.606594	Down
REACTOME_ACTIVATED_TAK1_MEDIATES_P38_MAPK_ACTIVATION	20	0.0240363	0.041795	0.958205	0.0835901	0.606594	Down
SHIPP_DLBCL_CURED_VS_FATAL_DN	58	0.00804203	0.0418184	0.958182	0.0836368	0.606594	Down
MOLENAAR_TARGETS_OF_CCND1_AND_CDK4_DN	63	0.26473	0.0419618	0.958038	0.0839235	0.606594	Down
REACTOME_CONVERSION_FROM_APC_CDC20_TO_APC_CDH1_IN_LATE_ANAPHASE	21	0.223123	0.042243	0.957757	0.084486	0.606594	Down
BIOCARTA_ETS_PATHWAY	21	0.0834329	0.0424105	0.95759	0.0848209	0.606594	Down
CHEOK_RESPONSE_TO_MERCAPTOPURINE_AND_HD_MTX_DN	30	0.0384087	0.0430205	0.95698	0.086041	0.606594	Down
VALK_AML_WITH_T_8_21_TRANSLOCATION	3	0.262033	0.0433127	0.956687	0.0866254	0.606594	Down
UDAYAKUMAR_MED1_TARGETS_DN	234	0.00284328	0.0433559	0.956644	0.0867119	0.606594	Down
RAGHAVACHARI_PLATELET_SPECIFIC_GENES	77	-0.00012113	0.0434591	0.956541	0.0869183	0.606594	Down
ZHAN_EARLY_DIFFERENTIATION_GENES_DN	57	0.148995	0.0435308	0.956469	0.0870617	0.606594	Down
BIOCARTA_FMLP_PATHWAY	44	-0.000773394	0.0435914	0.956409	0.0871829	0.606594	Down
SESTO_RESPONSE_TO_UV_C5	54	0.0243249	0.0437412	0.956259	0.0874824	0.606594	Down
DACOSTA_UV_RESPONSE_VIA_ERCC3_COMMON_DN	509	0.0564569	0.0439054	0.956095	0.0878108	0.606594	Down
BROWNE_HCMV_INFECTION_10HR_DN	62	0.0729285	0.0440723	0.955928	0.0881446	0.606594	Down
EGUCHI_CELL_CYCLE_RB1_TARGETS	23	0.41159	0.044252	0.955748	0.0885039	0.606594	Down
LEE_LIVER_CANCER_MYC_E2F1_DN	33	-0.0143053	0.0442899	0.95571	0.0885798	0.606594	Down
DACOSTA_UV_RESPONSE_VIA_ERCC3_DN	985	0.0553094	0.0443055	0.955695	0.0886109	0.606594	Down
ZHANG_RESPONSE_TO_IKK_INHIBITOR_AND_TNF_DN	82	0.0932537	0.0444053	0.955595	0.0888107	0.606594	Down
REN_ALVEOLAR_RHABDOMYOSARCOMA_UP	72	0.00395109	0.0445157	0.955484	0.0890314	0.606594	Down
MILI_PSEUDOPODIA_HAPTOTAXIS_UP	577	0.0987457	0.0449505	0.95505	0.089901	0.606594	Down
REACTOME_RAS_ACTIVATION_UOPN_CA2+_INFUX_THROUGH_NMDA_RECEPTOR	15	0.0955416	0.0450216	0.954978	0.0900432	0.606594	Down
KEGG_PROGESTERONE_MEDIATED_OOCYTE_MATURATION	93	0.0392268	0.0457649	0.954235	0.0915299	0.606594	Down
KEGG_MTOR_SIGNALING_PATHWAY	65	0.0417859	0.0458534	0.954147	0.0917068	0.606594	Down
MORI_IMMATURE_B_LYMPHOCYTE_DN	79	0.372405	0.0460251	0.953975	0.0920502	0.606594	Down
MEINHOLD_OVARIAN_CANCER_LOW_GRADE_DN	26	0.0335539	0.0461059	0.953894	0.0922117	0.606594	Down
KEGG_PHOSPHATIDYLINOSITOL_SIGNALING_SYSTEM	79	0.00449333	0.0462438	0.953756	0.0924876	0.606594	Down
ACEVEDO_NORMAL_TISSUE_ADJACENT_TO_LIVER_TUMOR_UP	164	0.0072764	0.0462695	0.95373	0.092539	0.606594	Down
BROWNE_HCMV_INFECTION_14HR_DN	258	0.00658324	0.0463977	0.953602	0.0927954	0.606594	Down
BIOCARTA_CREB_PATHWAY	43	0.0520602	0.0464314	0.953569	0.0928628	0.606594	Down
STEIN_ESRRA_TARGETS_DN	96	0.00647687	0.0465189	0.953481	0.0930378	0.606594	Down
THUM_SYSTOLIC_HEART_FAILURE_DN	193	0.0234156	0.0465687	0.953431	0.0931375	0.606594	Down
ZHAN_MULTIPLE_MYELOMA_MF_DN	28	-0.028404	0.0465719	0.953428	0.0931439	0.606594	Down
BIOCARTA_PS1_PATHWAY	19	0.0191424	0.0471223	0.952878	0.0942447	0.606594	Down
OUELLET_OVARIAN_CANCER_INVASIVE_VS_LMP_DN	12	0.106685	0.0472584	0.952742	0.0945168	0.606594	Down
HAMAI_APOPTOSIS_VIA_TRAIL_UP	342	0.0567475	0.04728	0.95272	0.09456	0.606594	Down
SAGIV_CD24_TARGETS_UP	26	0.0395536	0.0473036	0.952696	0.0946072	0.606594	Down
SMID_BREAST_CANCER_LUMINAL_A_UP	18	0.00909623	0.0474857	0.952514	0.0949714	0.606594	Down
BIOCARTA_PAR1_PATHWAY	40	-0.0128183	0.0476219	0.952378	0.0952437	0.606594	Down
GOVONI_GH1_TARGETS_24HR_DN	11	0.10166	0.0476763	0.952324	0.0953526	0.606594	Down
ST_FAS_SIGNALING_PATHWAY	68	-0.00134168	0.0479675	0.952032	0.0959351	0.606594	Down
BROWNE_HCMV_INFECTION_12HR_DN	80	0.0203381	0.0481482	0.951852	0.0962965	0.606594	Down
AMIT_EGF_RESPONSE_240_MCF10A	18	-0.0329026	0.0482205	0.951779	0.096441	0.606594	Down
MYLLYKANGAS_AMPLIFICATION_HOT_SPOT_9	4	0.103514	0.0483181	0.951682	0.0966362	0.606594	Down
SAKAI_TUMOR_INFILTRATING_MONOCYTES_UP	23	0.0311223	0.0483909	0.951609	0.0967819	0.606594	Down
MYLLYKANGAS_AMPLIFICATION_HOT_SPOT_5	9	-0.0325293	0.0487768	0.951223	0.0975535	0.606594	Down
KEGG_DORSO_VENTRAL_AXIS_FORMATION	23	0.0634854	0.0488652	0.951135	0.0977305	0.606594	Down
RUGO_RESPONSE_TO_GAMMA_RADIATION	37	0.0166633	0.0490043	0.950996	0.0980087	0.606594	Down
KYNG_DNA_DAMAGE_BY_GAMMA_RADIATION	37	0.0166633	0.0490043	0.950996	0.0980087	0.606594	Down
ZHAN_MULTIPLE_MYELOMA_SUBGROUPS	38	0.128706	0.0492602	0.95074	0.0985204	0.606594	Down
GENTILE_RESPONSE_CLUSTER_D3	54	0.0668966	0.0494436	0.950556	0.0988871	0.606594	Down
SCHLOSSER_SERUM_RESPONSE_DN	747	0.0264739	0.0498668	0.950133	0.0997336	0.606594	Down
KEGG_NOD_LIKE_RECEPTOR_SIGNALING_PATHWAY	56	0.00910406	0.0498803	0.95012	0.0997606	0.606594	Down
Differentially expressed genes
ProbeID	Symbol	logFC	AveExpr	t	P.Value	adj.P.Val	B
4150612	Smchd1	-4.41938	7.25619	-30.1538	1.59874e-14	2.23759e-10	18.3152
3190392	C030034I22Rik	-2.51945	6.10981	-24.5941	2.9368e-13	2.05517e-09	17.0188
4250632	Nlrc4	-2.57778	5.68611	-21.2874	2.2741e-12	1.06094e-08	15.9241
4490367	Ndn	4.39688	6.68482	20.6449	3.50419e-12	1.22612e-08	15.6733
7650360	Lbh	1.39364	8.03203	15.4113	2.06425e-10	5.77825e-07	12.9884
2100064	1700030C10Rik	1.97598	5.5466	13.2629	1.59876e-09	3.72936e-06	11.4386
7210039	Gpc1	2.44816	6.78524	12.8965	2.33216e-09	4.66298e-06	11.1396
2360553	Smchd1	-1.31183	5.1798	-11.6949	8.59877e-09	1.50435e-05	10.078
3830296	Gal3st1	1.49796	6.21828	11.187	1.54368e-08	2.39731e-05	9.58835
1070341	Pisd-ps3	1.39373	9.20484	11.0986	1.71285e-08	2.39731e-05	9.50051
160735	Smchd1	-1.38717	6.45485	-10.3424	4.28911e-08	5.45731e-05	8.71481
7200044	Ccnd1	1.17865	10.4634	10.1809	5.25313e-08	6.1269e-05	8.53887
1050358	Isl1	2.66454	6.10704	9.90056	7.51471e-08	8.09046e-05	8.22615
5960647	Yipf4	-0.947776	4.92241	-9.82001	8.34077e-08	8.33838e-05	8.13459
5690441	Ccnd1	1.27382	10.1304	9.27169	1.7264e-07	0.000161085	7.49026
4890246	Cask	1.33883	5.42954	8.98387	2.56152e-07	0.000224069	7.13683
730692	Eml1	2.10992	5.79546	8.88553	2.93734e-07	0.000241829	7.01358
1300246	Elavl2	2.44013	5.69944	8.6533	4.07585e-07	0.00031692	6.71743
380639	Sertad4	-1.1582	6.31014	-8.44214	5.51966e-07	0.000406596	6.44177
1990504	Mkrn3	1.63344	5.35839	8.18814	8.0045e-07	0.000560155	6.10197
2900139	Ube2e2	0.851889	4.95397	8.04418	9.91559e-07	0.000647033	5.90533
2140300	Psme4	-0.585229	11.3885	-8.02722	1.01706e-06	0.000647033	5.88197
2470553	Ptk2	0.752717	8.86049	7.78183	1.47442e-06	0.000897218	5.53927
5490358	Klhl6	-0.365805	12.2932	-7.7246	1.60955e-06	0.00092265	5.45807
6270634	Spns3	-1.04413	7.7853	-7.70922	1.64806e-06	0.00092265	5.43616
3830129	Crmp1	1.21301	5.18661	7.47623	2.36632e-06	0.00127381	5.10007
4880026	Tspan17	0.856216	7.67118	7.41964	2.58636e-06	0.00130495	5.01722
3120639	Pcdha7	0.974033	4.8896	7.41139	2.62021e-06	0.00130495	5.00509
1110326	Fcgr2b	0.637441	9.02582	7.39146	2.70388e-06	0.00130495	4.97577
7610484	Reln	1.89172	7.89484	7.16718	3.86527e-06	0.00178519	4.64165
20364	Ccnd1	1.29906	8.06829	7.15306	3.95406e-06	0.00178519	4.62036
5220279	Mt1	1.81929	11.4658	7.10268	4.28889e-06	0.00187585	4.54413
6980563	Ren1	-1.0004	5.47842	-7.02342	4.87721e-06	0.00206853	4.42344
3190731	Prickle1	1.02577	5.60827	6.79857	7.05571e-06	0.00290446	4.07577
3130129	Tapt1	-0.453068	11.3793	-6.76587	7.4493e-06	0.00297887	4.02454
60681	Cd86	0.820531	6.36034	6.72432	7.98282e-06	0.00310354	3.95922
5310682	Asap2	1.19052	5.38152	6.65325	8.99035e-06	0.00340078	3.84688
2030072	1810013D10Rik	-0.792763	7.03491	-6.58762	1.00394e-05	0.00369765	3.74244
1260164	Asns	1.13176	9.74688	6.46083	1.24462e-05	0.00446661	3.53877
3780192	Rhof	0.766796	6.3879	6.40144	1.37748e-05	0.00477586	3.4425
1820725	Mta3	-1.19202	9.98066	-6.39237	1.39904e-05	0.00477586	3.42775
7560291	Jun	0.724994	5.07157	6.36382	1.46926e-05	0.00489612	3.38124
4880022	Spast	-0.753726	5.21904	-6.1731	2.04364e-05	0.00658922	3.06728
6940136	Mllt4	1.09824	5.93605	6.15771	2.09928e-05	0.00658922	3.04168
1570026	Epb4.1l4b	-1.29405	5.53128	-6.15247	2.11857e-05	0.00658922	3.03297
20064	Capg	0.479345	9.4021	6.12791	2.21148e-05	0.00672868	2.99205
6900414	Spr	0.927745	7.04684	6.07773	2.41485e-05	0.0071911	2.90816
2340445	C130026I21Rik	3.04116	6.33211	6.04932	2.53855e-05	0.00740197	2.86049
4540717	Epb4.1l4b	-1.04533	5.52141	-5.94139	3.07224e-05	0.00863617	2.67826
2320184	Fgf13	-0.781022	5.95964	-5.93901	3.08523e-05	0.00863617	2.67422
6110138	C1galt1	-0.48162	11.4383	-5.84025	3.67913e-05	0.0100967	2.50586
6200446	Klk8	1.57773	5.67235	5.81678	3.83709e-05	0.0101785	2.46564
5080326	S100a6	1.94285	9.69582	5.81427	3.85438e-05	0.0101785	2.46133
6370379	Hexa	0.597565	8.34328	5.80215	3.93905e-05	0.0102094	2.44053
2320626	Asns	1.18611	7.71216	5.79046	4.02259e-05	0.0102364	2.42044
3180296	Maf1	-0.309443	12.1544	-5.77824	4.11195e-05	0.0102374	2.3994
4010475	Ltk	-0.683191	5.59139	-5.77054	4.16926e-05	0.0102374	2.38615
6270521	Ncam1	1.83378	5.2283	5.69092	4.81339e-05	0.0116152	2.24851
5910068	Lmo4	-1.09789	7.06838	-5.63504	5.32679e-05	0.0125236	2.15134
7330278	Lgals1	0.803922	12.3277	5.63071	5.3688e-05	0.0125236	2.14381
6940491	Stambpl1	-0.525722	10.0647	-5.61956	5.47886e-05	0.0125708	2.12434
2470040	Gnai1	1.22987	4.94314	5.60502	5.62575e-05	0.0126997	2.09896
5260201	Trp53inp1	-0.69965	10.3184	-5.52834	6.47163e-05	0.0143773	1.96453
1780445	Klhl6	-0.53532	6.9948	-5.50135	6.79993e-05	0.0145965	1.91701
6660241	Zfp292	-0.372195	9.09837	-5.49982	6.81912e-05	0.0145965	1.91431
2060546	Tnfrsf19	-1.08021	7.57645	-5.49472	6.88317e-05	0.0145965	1.90533
3390053	Bnip3l	-0.41265	9.6776	-5.48225	7.04273e-05	0.014712	1.88332
5810008	Whsc2	-0.319634	10.2752	-5.44526	7.53888e-05	0.0155168	1.81792
6520446	H2afv	-0.588737	12.0551	-5.43118	7.73709e-05	0.015694	1.79298
5700097	Macrod2	0.676295	5.08378	5.40724	8.08678e-05	0.0160649	1.7505
4480333	Ppic	1.0989	6.02388	5.40306	8.14953e-05	0.0160649	1.74307
60291	Trp53inp1	-0.68794	7.24884	-5.34985	8.99359e-05	0.0173647	1.64833
1010050	Lmo4	-0.500843	12.5613	-5.34606	9.05706e-05	0.0173647	1.64156
6650612	Lrig3	1.95518	5.63352	5.33752	9.20185e-05	0.0174039	1.62631
6760025	Krba1	-0.61594	6.19184	-5.31924	9.51984e-05	0.0175831	1.59364
870291	Fam132a	0.682836	6.46277	5.31766	9.54784e-05	0.0175831	1.59081
4640113	Igk-V5	-1.83903	8.06767	-5.29138	0.000100264	0.0182247	1.54376
7100192	Pgls	-0.874437	6.194	-5.27328	0.000103707	0.0186088	1.51128
6220725	C130026I21Rik	2.5316	5.81284	5.26536	0.00010525	0.0186466	1.49707
830369	Cyba	0.489417	11.9909	5.16385	0.000127293	0.0216432	1.31403
3140682	Atg9b	0.897541	7.06107	5.16336	0.000127411	0.0216432	1.31314
1690537	Aldoa	0.554083	10.5412	5.16048	0.000128102	0.0216432	1.30793
2030372	Igk-V5	-1.39139	6.86248	-5.1539	0.000129699	0.0216432	1.296
6380762	Igh-VJ558	-2.46833	9.85817	-5.15309	0.000129897	0.0216432	1.29454
270341	Emb	1.32332	7.66861	5.11195	0.000140365	0.0227456	1.21989
3420075	1110018G07Rik	-0.31	10.1411	-5.11155	0.000140471	0.0227456	1.21916
5290671	Fdps	0.674113	10.7309	5.1081	0.000141388	0.0227456	1.2129
4830612	Hopx	1.076	8.10091	5.08875	0.000146648	0.0233236	1.17771
4780301	LOC675759	-1.34205	6.8473	-5.06461	0.000153496	0.0241386	1.13374
3520113	Rrm2b	-0.475224	9.47645	-5.04501	0.000159303	0.0247733	1.09796
4120626	Tardbp	-0.911206	7.10734	-5.01376	0.000169028	0.0259969	1.04085
240242	Igh-VJ558	-2.28257	6.99251	-4.99411	0.00017546	0.0266927	1.00486
6590338	Trim33	-0.388085	7.98569	-4.98725	0.000177764	0.0267526	0.992282
2100097	Mvd	1.24749	6.56516	4.96479	0.000185527	0.0276238	0.951081
5700689	Lgr5	-0.917906	7.24157	-4.95802	0.000187937	0.027688	0.938642
630678	Mta3	-1.0368	7.04447	-4.95207	0.000190078	0.0277118	0.92772
4390246	Kdm5a	-0.807222	5.54016	-4.94533	0.00019254	0.0277813	0.915316
5420541	Sbf1	-0.550436	5.004	-4.92821	0.000198932	0.0284107	0.883829
10255	Cdc14b	0.815025	5.97373	4.92189	0.000201346	0.028465	0.872197
830445	Slc6a13	1.31029	6.05253	4.91197	0.0002052	0.0284778	0.853914
7550730	Dgkd	-0.444727	11.307	-4.91049	0.000205779	0.0284778	0.851198
6620521	Kcnk6	0.788887	7.77333	4.90604	0.000207541	0.0284778	0.84298
3170246	Neil1	-0.854998	6.60882	-4.87822	0.000218885	0.0296673	0.791661
510368	Fos	2.14217	6.10665	4.87451	0.000220448	0.0296673	0.784798
7330722	Cdk19	-0.373386	9.05524	-4.86383	0.000225005	0.0299544	0.765067
4480605	Zfp212	-0.327418	10.196	-4.85955	0.000226862	0.0299544	0.757141
6550671	D17Wsu104e	0.391378	9.25939	4.84879	0.000231592	0.0302931	0.737243
2750521	N6amt2	0.581625	8.44404	4.84083	0.000235156	0.0304744	0.722514
2650136	Dclk2	-0.639945	5.66555	-4.82695	0.000241511	0.0310109	0.696793
620360	Cnih4	0.311846	10.1772	4.81868	0.00024538	0.0312213	0.681463
6520392	Csprs	3.4071	6.54393	4.81014	0.000249444	0.0314524	0.665622
110577	Tardbp	-0.794342	7.69594	-4.79785	0.000255409	0.0318961	0.642827
5130703	Foxn3	-0.500244	8.7613	-4.79358	0.000257521	0.0318961	0.634883
2100678	Tmem205	0.681524	6.54435	4.78756	0.000260521	0.0319846	0.623712
4120687	Glipr2	0.975412	7.89306	4.77992	0.000264385	0.0320513	0.609507
2190403	Sgcb	0.577746	6.94646	4.77746	0.000265643	0.0320513	0.604928
7380630	E330016A19Rik	0.640056	9.35393	4.76928	0.000269861	0.0322818	0.589734
4180703	Gigyf1	-0.626435	7.55405	-4.75569	0.000277033	0.0328589	0.564429
1990180	Fibp	-0.418324	7.11894	-4.74735	0.000281524	0.03289	0.548915
7570537	Lmo2	1.03299	8.7137	4.74276	0.000284032	0.03289	0.540359
2760528	Klhl24	-0.546849	9.78116	-4.73265	0.000289637	0.03289	0.521507
6370189	Bckdha	-0.532781	9.69503	-4.73188	0.000290064	0.03289	0.520086
3440181	Klhl24	-0.846865	5.78977	-4.72984	0.000291211	0.03289	0.516279
1710215	Angptl4	0.679693	8.18544	4.72951	0.000291395	0.03289	0.51567
5890544	Pppde2	-0.369735	9.81438	-4.7242	0.000294403	0.0329638	0.505761
6450056	Sqle	0.567937	9.35821	4.70268	0.000306921	0.0334545	0.465589
50064	LOC677643	-1.09069	9.36226	-4.69689	0.000310382	0.0334545	0.454771
2030576	Dazap2	-0.399071	11.449	-4.69339	0.000312488	0.0334545	0.448246
1850128	Elovl1	0.358478	10.2605	4.69213	0.000313256	0.0334545	0.445875
1240039	Plcd3	-0.691187	6.9494	-4.68878	0.000315292	0.0334545	0.439626
7160048	Cops7a	0.381806	7.78518	4.68709	0.000316328	0.0334545	0.43646
7100484	Glcci1	-0.698483	6.04364	-4.6869	0.000316444	0.0334545	0.436108
4010615	Nipbl	-0.448208	9.61234	-4.68447	0.000317935	0.0334545	0.431573
5130301	Klhdc2	-0.30364	11.3828	-4.68065	0.000320299	0.0334545	0.424424
4730039	Rap1gap	0.824296	5.28458	4.67574	0.00032336	0.0335241	0.415247
7570008	Spg21	-0.378019	10.4969	-4.66154	0.000332395	0.0336276	0.388658
5080356	Tcf12	-0.54725	4.86271	-4.66078	0.000332886	0.0336276	0.387234
6650630	Zfp710	-0.370452	8.88121	-4.66029	0.000333197	0.0336276	0.386333
610129	Fam164a	0.566917	6.69052	4.65369	0.000337498	0.0336276	0.373957
240343	Tbc1d15	-0.314906	9.79598	-4.64731	0.000341704	0.0336276	0.362007
2450088	Mboat1	0.673862	5.0207	4.64643	0.000342283	0.0336276	0.360373
3940458	Rfc4	-0.438631	10.5405	-4.64557	0.000342861	0.0336276	0.358748
4670091	LOC100048770	-0.927453	7.85935	-4.64449	0.00034358	0.0336276	0.356724
2480551	Aprt	0.244724	11.9955	4.63761	0.000348203	0.0338434	0.343828
5720014	Sord	-0.610885	7.98965	-4.61382	0.000364689	0.0347354	0.299194
3850241	LOC637785	-1.09554	8.98858	-4.61374	0.000364744	0.0347354	0.299048
2190671	Dck	-0.474692	8.41933	-4.61362	0.000364826	0.0347354	0.298831
2370523	Ube2h	-0.494727	9.33935	-4.60381	0.00037186	0.0351659	0.280403
6650291	Manea	-0.367027	8.48291	-4.59825	0.000375911	0.0353104	0.269951
5900468	Traf6	-0.481184	7.07756	-4.58643	0.000384662	0.0358915	0.247744
540102	Msh3	-0.520339	6.35631	-4.57394	0.000394146	0.036289	0.224242
5900605	Zfp367	-0.459341	7.8474	-4.57121	0.000396246	0.036289	0.219114
4260647	Fbxl12	-0.727913	8.96509	-4.5695	0.00039757	0.036289	0.215897
1740445	Zfp777	-0.356861	7.92189	-4.56728	0.000399294	0.036289	0.211722
6100164	D19Ertd737e	-0.617956	6.23148	-4.56208	0.000403367	0.0364228	0.201927
4670066	Nadk	0.258257	9.97488	4.54299	0.000418685	0.0375636	0.165963
2600019	Clspn	-0.382746	10.3996	-4.53574	0.000424659	0.0376343	0.152292
4780681	Cdk19	-0.369307	10.2875	-4.53551	0.000424851	0.0376343	0.151856
2810609	E330020D12Rik	0.598838	6.30654	4.53051	0.000429023	0.0377648	0.142428
6200634	Fzd10	1.82761	5.41244	4.51276	0.000444172	0.038854	0.108943
3890072	Mgmt	0.872554	5.4794	4.50797	0.000448359	0.0388795	0.0998908
5270689	Igf1r	0.582202	4.95752	4.50608	0.00045002	0.0388795	0.0963232
4590619	Lrrn3	-0.841622	5.66659	-4.49622	0.000458787	0.0392573	0.0777057
6520598	Tspan31	1.05433	8.21993	4.49086	0.000463631	0.0392573	0.067572
6200500	Dyrk1b	-0.521199	8.01169	-4.49033	0.000464112	0.0392573	0.0665713
2750762	Net1	-0.629155	5.74051	-4.48868	0.000465612	0.0392573	0.0634565
1300537	Cnp	-0.436531	6.62257	-4.4816	0.000472118	0.0395674	0.0500692
3840411	Lig4	-0.66149	6.36894	-4.47818	0.000475293	0.0395964	0.0436018
3450091	Ctsz	0.565844	9.41951	4.46855	0.000484347	0.0398738	0.025394
6040674	Rab5b	-0.60997	6.65383	-4.4674	0.000485442	0.0398738	0.0232145
1500491	Nusap1	-0.476854	11.5528	-4.46235	0.000490274	0.0398738	0.013658
7550324	Irgm1	0.402628	12.6459	4.46141	0.000491182	0.0398738	0.0118723
2370148	Acy1	0.51841	7.94238	4.45966	0.000492868	0.0398738	0.00856746
4780255	Frat2	-0.835449	8.87559	-4.43077	0.000521629	0.0419582	-0.0461548
2900333	Pdia5	1.99296	6.93197	4.40819	0.000545315	0.0436127	-0.0889979
2810689	Arhgap8	0.677513	7.48155	4.40194	0.000552058	0.0437067	-0.100856
1030484	Hnrnpm	-0.234414	13.2205	-4.40131	0.000552736	0.0437067	-0.10204
430333	Ncapg2	-0.577999	7.21485	-4.39142	0.000563607	0.044316	-0.120829
7400735	Iqcb1	-0.343154	9.37601	-4.37646	0.000580456	0.0453356	-0.149247
4570451	Cdkn1c	1.0515	7.77303	4.36779	0.000590465	0.0453356	-0.16574
2810273	Tspan17	0.54665	5.24796	4.36704	0.000591336	0.0453356	-0.167163
5890487	Gstk1	0.452289	7.53633	4.36637	0.000592117	0.0453356	-0.168436
3290259	Cdc23	-0.461834	8.57635	-4.36581	0.000592771	0.0453356	-0.169501
3610193	Rab11b	-0.249587	12.5254	-4.35951	0.000600174	0.045416	-0.181474
4010750	Xrcc6	-0.538741	9.27512	-4.3594	0.000600312	0.045416	-0.181695
3460333	Golm1	0.7188	8.57574	4.34685	0.000615352	0.046256	-0.205567
870195	Pde4b	-0.395389	8.36547	-4.34216	0.000621071	0.046256	-0.21449
7570050	Hdac5	-0.584891	8.67266	-4.3394	0.000624459	0.046256	-0.219738
3940639	Glipr2	0.952102	7.56477	4.33926	0.000624635	0.046256	-0.220009
2100484	Plxnb2	0.412689	7.68683	4.33549	0.000629305	0.0463566	-0.227195
6760372	Hook3	-0.458851	4.98281	-4.33085	0.000635087	0.0465376	-0.236016
4830129	Srebf2	0.615255	7.92956	4.32439	0.000643247	0.04689	-0.248331
5390553	LOC640696	-0.95679	7.33429	-4.3138	0.000656844	0.0475187	-0.268507
4040270	Agrn	1.25634	6.25783	4.3124	0.000658662	0.0475187	-0.271174
3310427	Pgls	-0.796556	6.59556	-4.3059	0.000667187	0.0478609	-0.283578
2320403	Gch1	0.386598	8.14401	4.30358	0.000670244	0.0478609	-0.287987
5860053	A530032D15Rik	1.34766	5.93623	4.29728	0.000678645	0.0482111	-0.300001
6940504	Mir17hg	-1.02083	9.90204	-4.29476	0.000682037	0.0482111	-0.30481
5670564	Cryl1	0.447461	8.66743	4.29219	0.000685509	0.048213	-0.309707
4830021	Kbtbd2	-0.295049	9.57114	-4.28384	0.000696939	0.0487718	-0.325655
150630	Pcyt2	0.312236	8.91306	4.28092	0.000700972	0.0488099	-0.33122
1820731	Klk1b27	2.14544	7.40711	4.26723	0.000720228	0.0499026	-0.357356
1340465	Orai1	0.609911	7.04745	4.2639	0.000724993	0.0499852	-0.363715

## Sheet: Table S4 - lymphomas
Table S4
MSigDB C2 Curated Gene Sets	NGenes	Correlation	Down	Up	TwoSided	FDR	Direction
GOZGIT_ESR1_TARGETS_UP	89	-0.00371717	0.997405	0.00259519	0.00519039	0.999874	Up
GRAHAM_CML_DIVIDING_VS_NORMAL_DIVIDING_UP	7	0.0304394	0.993225	0.00677525	0.0135505	0.999874	Up
KEGG_HISTIDINE_METABOLISM	21	-0.000428561	0.992612	0.00738759	0.0147752	0.999874	Up
REACTOME_NCAM1_INTERACTIONS	11	0.0352357	0.99169	0.00830984	0.0166197	0.999874	Up
LU_TUMOR_VASCULATURE_UP	14	0.0455371	0.991199	0.0088006	0.0176012	0.999874	Up
SCHUETZ_BREAST_CANCER_DUCTAL_INVASIVE_DN	47	0.0236356	0.990403	0.00959652	0.019193	0.999874	Up
MARTINEZ_RESPONSE_TO_TRABECTEDIN_UP	62	0.00771242	0.990101	0.00989884	0.0197977	0.999874	Up
LU_TUMOR_ENDOTHELIAL_MARKERS_UP	13	0.0582137	0.988586	0.0114142	0.0228284	0.999874	Up
LEE_INTRATHYMIC_T_PROGENITOR	5	-0.0615292	0.988262	0.0117377	0.0234754	0.999874	Up
THUM_SYSTOLIC_HEART_FAILURE_UP	355	0.00031105	0.987877	0.0121232	0.0242465	0.999874	Up
WANG_ESOPHAGUS_CANCER_VS_NORMAL_DN	86	0.00308556	0.987407	0.012593	0.025186	0.999874	Up
CHIANG_LIVER_CANCER_SUBCLASS_INTERFERON_DN	19	-0.0170823	0.987228	0.0127717	0.0255433	0.999874	Up
KEGG_SNARE_INTERACTIONS_IN_VESICULAR_TRANSPORT	54	0.00918432	0.987189	0.0128108	0.0256216	0.999874	Up
CERVERA_SDHB_TARGETS_2	35	-0.00882019	0.985991	0.0140089	0.0280178	0.999874	Up
WANG_RESPONSE_TO_PACLITAXEL_VIA_MAPK8_UP	15	0.00979564	0.985923	0.014077	0.0281539	0.999874	Up
TURASHVILI_BREAST_LOBULAR_CARCINOMA_VS_LOBULAR_NORMAL_UP	52	0.0493635	0.985114	0.0148859	0.0297719	0.999874	Up
REACTOME_TIE2_SIGNALING	20	-0.0160991	0.984559	0.0154406	0.0308813	0.999874	Up
CHEBOTAEV_GR_TARGETS_UP	49	-0.00610103	0.983816	0.0161844	0.0323688	0.999874	Up
NIELSEN_LIPOSARCOMA_UP	1	NA	0.983394	0.0166057	0.0332113	0.999874	Up
GU_PDEF_TARGETS_DN	12	0.00926931	0.979407	0.0205926	0.0411852	0.999874	Up
LI_CYTIDINE_ANALOGS_CYCTOTOXICITY	21	-0.0129132	0.979079	0.020921	0.0418419	0.999874	Up
BANDRES_RESPONSE_TO_CARMUSTIN_WITHOUT_MGMT_48HR_UP	12	-0.0121135	0.978868	0.0211319	0.0422637	0.999874	Up
DOANE_BREAST_CANCER_ESR1_UP	40	0.00213029	0.978611	0.0213894	0.0427787	0.999874	Up
CHIARADONNA_NEOPLASTIC_TRANSFORMATION_CDC25_UP	93	0.000674304	0.978344	0.0216557	0.0433115	0.999874	Up
LEE_NEURAL_CREST_STEM_CELL_UP	53	-0.00576301	0.978249	0.0217506	0.0435013	0.999874	Up
REACTOME_CLASS_B2_SECRETIN_FAMILY_RECEPTORS	24	-0.0259844	0.977616	0.0223837	0.0447675	0.999874	Up
NAKAJIMA_MAST_CELL	11	-0.00142564	0.97702	0.0229802	0.0459604	0.999874	Up
REACTOME_FRS2MEDIATED_CASCADE	5	-0.0415951	0.976883	0.0231175	0.046235	0.999874	Up
NAKAYAMA_SOFT_TISSUE_TUMORS_PCA1_DN	10	0.161748	0.976099	0.0239014	0.0478028	0.999874	Up
HEIDENBLAD_AMPLICON_8Q24_DN	42	-0.0139068	0.976043	0.0239566	0.0479132	0.999874	Up
HASLINGER_B_CLL_WITH_MUTATED_VH_GENES	7	-0.0205868	0.974931	0.0250694	0.0501389	0.999874	Up
IZADPANAH_STEM_CELL_ADIPOSE_VS_BONE_DN	53	-0.00594827	0.974685	0.0253149	0.0506298	0.999874	Up
PATTERSON_DOCETAXEL_RESISTANCE	6	-0.0365213	0.974288	0.0257121	0.0514242	0.999874	Up
BOYLAN_MULTIPLE_MYELOMA_PCA3_UP	33	0.0165265	0.974205	0.0257945	0.0515891	0.999874	Up
LIEN_BREAST_CARCINOMA_METAPLASTIC	12	-0.0400177	0.974075	0.0259246	0.0518493	0.999874	Up
KEGG_DRUG_METABOLISM_CYTOCHROME_P450	22	0.0100648	0.973909	0.0260909	0.0521818	0.999874	Up
ROYLANCE_BREAST_CANCER_16Q_COPY_NUMBER_DN	8	0.171052	0.973212	0.0267883	0.0535765	0.999874	Up
CHEOK_RESPONSE_TO_MERCAPTOPURINE_DN	20	-0.00656159	0.971905	0.0280947	0.0561895	0.999874	Up
WONG_ENDMETRIUM_CANCER_DN	11	-0.0707366	0.971796	0.0282045	0.056409	0.999874	Up
HAEGERSTRAND_RESPONSE_TO_IMATINIB	2	-0.108526	0.971345	0.0286551	0.0573102	0.999874	Up
REACTOME_INSULIN_SYNTHESIS_AND_SECRETION	124	0.00502623	0.970962	0.0290382	0.0580764	0.999874	Up
WALLACE_PROSTATE_CANCER_RACE_DN	65	0.0200222	0.970416	0.0295839	0.0591678	0.999874	Up
REACTOME_ACTIVATION_OF_BH3_ONLY_PROTEINS	25	-0.00727065	0.969282	0.0307184	0.0614368	0.999874	Up
ZHAN_MULTIPLE_MYELOMA_MS_UP	20	0.0982187	0.968858	0.0311425	0.0622849	0.999874	Up
LIU_NASOPHARYNGEAL_CARCINOMA	65	-0.00710472	0.968788	0.0312118	0.0624236	0.999874	Up
WAMUNYOKOLI_OVARIAN_CANCER_LMP_DN	109	-0.00532326	0.968452	0.0315483	0.0630966	0.999874	Up
BRUNEAU_SEPTATION_VENTRICULAR	8	0.0354046	0.968425	0.0315753	0.0631506	0.999874	Up
REACTOME_RAS_ACTIVATION_UOPN_CA2+_INFUX_THROUGH_NMDA_RECEPTOR	17	0.0377593	0.9677	0.0323	0.0646001	0.999874	Up
BIOCARTA_DREAM_PATHWAY	11	0.0140567	0.967655	0.0323449	0.0646897	0.999874	Up
BEGUM_TARGETS_OF_PAX3_FOXO1_FUSION_UP	26	-0.0171537	0.967305	0.0326949	0.0653897	0.999874	Up
REACTOME_GLYCOGEN_BREAKDOWN_GLYCOGENOLYSIS	19	0.0165005	0.96567	0.0343297	0.0686594	0.999874	Up
KEGG_MATURITY_ONSET_DIABETES_OF_THE_YOUNG	6	0.0739738	0.965393	0.0346067	0.0692135	0.999874	Up
SMID_BREAST_CANCER_ERBB2_DN	1	NA	0.962912	0.0370879	0.0741758	0.999874	Up
DOANE_BREAST_CANCER_CLASSES_DN	24	0.0404188	0.962197	0.0378033	0.0756065	0.999874	Up
PEPPER_CHRONIC_LYMPHOCYTIC_LEUKEMIA_UP	18	0.000543617	0.962128	0.0378722	0.0757444	0.999874	Up
MASSARWEH_TAMOXIFEN_RESISTANCE_DN	168	0.00771341	0.961676	0.0383238	0.0766476	0.999874	Up
MYLLYKANGAS_AMPLIFICATION_HOT_SPOT_30	8	0.0666164	0.95927	0.0407299	0.0814597	0.999874	Up
DORSAM_HOXA9_TARGETS_UP	44	0.0208502	0.959188	0.040812	0.081624	0.999874	Up
REACTOME_VITAMIN_B5_(PANTOTHENATE)_METABOLISM	11	0.0350235	0.958328	0.0416721	0.0833441	0.999874	Up
WEBER_METHYLATED_LCP_IN_FIBROBLAST_UP	1	NA	0.957607	0.0423932	0.0847863	0.999874	Up
WEBER_METHYLATED_LCP_IN_SPERM_UP	1	NA	0.957607	0.0423932	0.0847863	0.999874	Up
LINDGREN_BLADDER_CANCER_CLUSTER_1_UP	113	0.00632567	0.957163	0.042837	0.0856739	0.999874	Up
ACEVEDO_LIVER_CANCER_WITH_H3K9ME3_UP	40	0.00697655	0.957042	0.0429582	0.0859164	0.999874	Up
BREDEMEYER_RAG_SIGNALING_VIA_ATM_NOT_VIA_NFKB_UP	43	0.012258	0.956806	0.0431937	0.0863875	0.999874	Up
ROPERO_HDAC2_TARGETS	70	-0.00136094	0.956688	0.0433119	0.0866238	0.999874	Up
SCHLESINGER_METHYLATED_IN_COLON_CANCER	2	0.927807	0.956158	0.0438417	0.0876834	0.999874	Up
BREDEMEYER_RAG_SIGNALING_NOT_VIA_ATM_UP	56	0.000305846	0.955731	0.0442694	0.0885387	0.999874	Up
HAHTOLA_MYCOSIS_FUNGOIDES_CD4_UP	51	0.020559	0.955271	0.0447286	0.0894572	0.999874	Up
MCCOLLUM_GELDANAMYCIN_RESISTANCE_DN	1	NA	0.955155	0.0448454	0.0896909	0.999874	Up
KEGG_METABOLISM_OF_XENOBIOTICS_BY_CYTOCHROME_P450	23	0.0320409	0.954973	0.0450271	0.0900542	0.999874	Up
GAUSSMANN_MLL_AF4_FUSION_TARGETS_D_DN	5	0.118159	0.953391	0.046609	0.093218	0.999874	Up
RIGGINS_TAMOXIFEN_RESISTANCE_UP	45	-0.00363209	0.952805	0.0471948	0.0943897	0.999874	Up
HANN_RESISTANCE_TO_BCL2_INHIBITOR_DN	13	0.0997035	0.95251	0.0474899	0.0949798	0.999874	Up
SMID_BREAST_CANCER_RELAPSE_IN_BONE_UP	30	0.00250816	0.951854	0.0481462	0.0962925	0.999874	Up
SCHRAMM_INHBA_TARGETS_DN	6	0.191909	0.950771	0.0492287	0.0984575	0.999874	Up
MYLLYKANGAS_AMPLIFICATION_HOT_SPOT_3	8	-0.0718342	0.00185596	0.998144	0.00371193	0.999874	Down
VALK_AML_CLUSTER_12	26	-0.0301328	0.00493859	0.995061	0.00987718	0.999874	Down
ROVERSI_GLIOMA_COPY_NUMBER_UP	69	0.00057804	0.00513647	0.994864	0.0102729	0.999874	Down
REACTOME_NOTCH_HLH_TRANSCRIPTION_PATHWAY	9	0.0272782	0.00569981	0.9943	0.0113996	0.999874	Down
SHEDDEN_LUNG_CANCER_GOOD_SURVIVAL_A12	177	-0.00347963	0.00584402	0.994156	0.011688	0.999874	Down
REACTOME_P75NTR_RECRUITS_SIGNALLING_COMPLEXES	13	-0.0164732	0.00654223	0.993458	0.0130845	0.999874	Down
HASLINGER_B_CLL_WITH_6Q21_DELETION	15	0.0591292	0.00713111	0.992869	0.0142622	0.999874	Down
KANNAN_TP53_TARGETS_UP	45	0.0122968	0.00731677	0.992683	0.0146335	0.999874	Down
DASU_IL6_SIGNALING_SCAR_DN	6	-0.0953715	0.00796418	0.992036	0.0159284	0.999874	Down
REACTOME_MYD88_CASCADE	27	0.0443404	0.00815518	0.991845	0.0163104	0.999874	Down
SHAFFER_IRF4_MULTIPLE_MYELOMA_PROGRAM	29	-0.00643347	0.00945623	0.990544	0.0189125	0.999874	Down
REACTOME_AMINE_LIGAND_BINDING_RECEPTORS	7	-0.0572554	0.00951846	0.990482	0.0190369	0.999874	Down
ZHAN_MULTIPLE_MYELOMA_CD1_AND_CD2_DN	50	-0.00664646	0.0108869	0.989113	0.0217737	0.999874	Down
HOFFMANN_PRE_BI_TO_LARGE_PRE_BII_LYMPHOCYTE_UP	20	0.0197289	0.0109647	0.989035	0.0219295	0.999874	Down
MCCOLLUM_GELDANAMYCIN_RESISTANCE_UP	5	0.0763763	0.0134324	0.986568	0.0268649	0.999874	Down
MYLLYKANGAS_AMPLIFICATION_HOT_SPOT_23	26	0.0475717	0.0139412	0.986059	0.0278824	0.999874	Down
REACTOME_A_THIRD_PROTEOLYTIC_CLEAVAGE_RELEASES_NICD	9	-0.0931714	0.0140465	0.985953	0.0280931	0.999874	Down
LEE_LIVER_CANCER_CIPROFIBRATE_DN	31	-0.0130423	0.0160354	0.983965	0.0320708	0.999874	Down
ZHU_CMV_ALL_UP	54	-0.00324162	0.0163552	0.983645	0.0327103	0.999874	Down
KEGG_NOTCH_SIGNALING_PATHWAY	36	0.021714	0.0170649	0.982935	0.0341299	0.999874	Down
BILBAN_B_CLL_LPL_UP	76	0.0107698	0.0171877	0.982812	0.0343753	0.999874	Down
WIKMAN_ASBESTOS_LUNG_CANCER_DN	36	0.00109556	0.0177975	0.982202	0.0355951	0.999874	Down
BIOCARTA_VDR_PATHWAY	13	0.0267209	0.0177994	0.982201	0.0355988	0.999874	Down
DER_IFN_GAMMA_RESPONSE_UP	78	0.0168149	0.0182675	0.981732	0.036535	0.999874	Down
SENGUPTA_NASOPHARYNGEAL_CARCINOMA_WITH_LMP1_DN	38	0.0247111	0.0184695	0.981531	0.0369389	0.999874	Down
REACTOME_TOLL_LIKE_RECEPTOR_9_CASCADE	30	0.0568943	0.0187138	0.981286	0.0374275	0.999874	Down
ZHAN_MULTIPLE_MYELOMA_MF_UP	39	0.0155923	0.0188439	0.981156	0.0376878	0.999874	Down
LINDGREN_BLADDER_CANCER_CLUSTER_3_DN	196	0.00767332	0.0197026	0.980297	0.0394053	0.999874	Down
LUI_THYROID_CANCER_PAX8_PPARG_UP	41	0.00383895	0.020003	0.979997	0.040006	0.999874	Down
5820315	32	-0.0021508	0.0206977	0.979302	0.0413953	0.999874	Down
IIZUKA_LIVER_CANCER_PROGRESSION_G1_G2_DN	37	0.0275788	0.0211595	0.978841	0.042319	0.999874	Down
REACTOME_ACTIVATED_TLR4_SIGNALLING	35	0.0536409	0.0219764	0.978024	0.0439528	0.999874	Down
FUJII_YBX1_TARGETS_UP	29	0.0529177	0.0227477	0.977252	0.0454953	0.999874	Down
DER_IFN_BETA_RESPONSE_DN	6	0.0823933	0.0232224	0.976778	0.0464448	0.999874	Down
KEGG_GLYCEROPHOSPHOLIPID_METABOLISM	67	-0.00460256	0.0234093	0.976591	0.0468185	0.999874	Down
NOUZOVA_METHYLATED_IN_APL	33	0.0213271	0.0243228	0.975677	0.0486456	0.999874	Down
YAO_TEMPORAL_RESPONSE_TO_PROGESTERONE_CLUSTER_0	55	0.0688916	0.0245736	0.975426	0.0491472	0.999874	Down
MCBRYAN_PUBERTAL_BREAST_3_4WK_UP	127	0.000763792	0.0262523	0.973748	0.0525046	0.999874	Down
WILCOX_PRESPONSE_TO_ROGESTERONE_DN	32	0.0260816	0.026607	0.973393	0.0532141	0.999874	Down
REACTOME_NRIF_SIGNALS_CELL_DEATH_FROM_THE_NUCLEUS	16	0.0256884	0.0266228	0.973377	0.0532456	0.999874	Down
SATO_SILENCED_EPIGENETICALLY_IN_PANCREATIC_CANCER	17	-0.0117907	0.0271035	0.972896	0.0542071	0.999874	Down
REACTOME_SIGNALING_BY_NOTCH	10	-0.0898204	0.0273111	0.972689	0.0546221	0.999874	Down
EBAUER_MYOGENIC_TARGETS_OF_PAX3_FOXO1_FUSION	25	-0.00569908	0.0281647	0.971835	0.0563294	0.999874	Down
GARGALOVIC_RESPONSE_TO_OXIDIZED_PHOSPHOLIPIDS_GREEN_UP	23	0.0259862	0.0285686	0.971431	0.0571373	0.999874	Down
YAO_HOXA10_TARGETS_VIA_PROGESTERONE_DN	6	0.0751595	0.0317072	0.968293	0.0634145	0.999874	Down
ZIRN_TRETINOIN_RESPONSE_WT1_UP	9	0.356392	0.032195	0.967805	0.0643899	0.999874	Down
LANDIS_ERBB2_BREAST_TUMORS_324_UP	133	0.0024622	0.0321955	0.967805	0.064391	0.999874	Down
OUELLET_CULTURED_OVARIAN_CANCER_INVASIVE_VS_LMP_DN	17	0.0436914	0.0323789	0.967621	0.0647578	0.999874	Down
SOTIRIOU_BREAST_CANCER_GRADE_1_VS_3_DN	37	0.0217487	0.0330509	0.966949	0.0661017	0.999874	Down
GARGALOVIC_RESPONSE_TO_OXIDIZED_PHOSPHOLIPIDS_YELLOW_DN	29	0.0110211	0.0339554	0.966045	0.0679108	0.999874	Down
HEIDENBLAD_AMPLIFIED_IN_BONE_CANCER	7	-0.0871902	0.0341457	0.965854	0.0682913	0.999874	Down
WINNEPENNINCKX_MELANOMA_METASTASIS_DN	25	0.0367738	0.0342264	0.965774	0.0684528	0.999874	Down
BIOCARTA_UCALPAIN_PATHWAY	12	0.0342886	0.0342303	0.96577	0.0684607	0.999874	Down
RAY_ALZHEIMERS_DISEASE	1	NA	0.0349425	0.965058	0.069885	0.999874	Down
CHEOK_RESPONSE_TO_MERCAPTOPURINE_AND_HD_MTX_DN	30	0.0100732	0.0366603	0.96334	0.0733207	0.999874	Down
KEGG_PATHOGENIC_ESCHERICHIA_COLI_INFECTION	61	0.0284458	0.0377232	0.962277	0.0754465	0.999874	Down
BIOCARTA_SODD_PATHWAY	15	0.0359617	0.0386431	0.961357	0.0772862	0.999874	Down
ZHU_CMV_8_HR_UP	30	0.112632	0.0393572	0.960643	0.0787145	0.999874	Down
YAO_TEMPORAL_RESPONSE_TO_PROGESTERONE_CLUSTER_3	14	-0.0288616	0.0398322	0.960168	0.0796644	0.999874	Down
REACTOME_ACETYLCHOLINE_NEUROTRANSMITTER_RELEASE_CYCLE	5	0.0114981	0.040576	0.959424	0.081152	0.999874	Down
REACTOME_DOPAMINE_NEUROTRANSMITTER_RELEASE_CYCLE	5	0.0114981	0.040576	0.959424	0.081152	0.999874	Down
REACTOME_NOREPINEPHRINE_NEUROTRANSMITTER_RELEASE_CYCLE	5	0.0114981	0.040576	0.959424	0.081152	0.999874	Down
REACTOME_SEROTONIN_NEUROTRANSMITTER_RELEASE_CYCLE	5	0.0114981	0.040576	0.959424	0.081152	0.999874	Down
MCBRYAN_PUBERTAL_BREAST_6_7WK_DN	45	-0.00580975	0.0406808	0.959319	0.0813615	0.999874	Down
BERTUCCI_INVASIVE_CARCINOMA_DUCTAL_VS_LOBULAR_DN	22	0.114314	0.040869	0.959131	0.0817381	0.999874	Down
ZERBINI_RESPONSE_TO_SULINDAC_UP	9	-0.0366042	0.0423654	0.957635	0.0847309	0.999874	Down
LIANG_HEMATOPOIESIS_STEM_CELL_NUMBER_SMALL_VS_HUGE_DN	31	0.0303695	0.042511	0.957489	0.085022	0.999874	Down
REACTOME_REGULATED_PROTEOLYSIS_OF_P75NTR	16	0.0482498	0.0433436	0.956656	0.0866872	0.999874	Down
KERLEY_RESPONSE_TO_CISPLATIN_UP	34	-0.00163478	0.0435855	0.956414	0.087171	0.999874	Down
BIOCARTA_PML_PATHWAY	27	0.0861518	0.0440371	0.955963	0.0880742	0.999874	Down
REACTOME_LIPOPROTEIN_METABOLISM	10	-0.0416134	0.0443938	0.955606	0.0887876	0.999874	Down
GLINSKY_CANCER_DEATH_UP	4	-0.0232628	0.0445364	0.955464	0.0890728	0.999874	Down
SMID_BREAST_CANCER_RELAPSE_IN_LUNG_UP	10	0.13199	0.0447056	0.955294	0.0894113	0.999874	Down
LUI_THYROID_CANCER_CLUSTER_1	54	-0.0015382	0.0447305	0.955269	0.0894611	0.999874	Down
BROWNE_HCMV_INFECTION_10HR_DN	60	0.019597	0.0450561	0.954944	0.0901121	0.999874	Down
BROWNE_HCMV_INFECTION_24HR_DN	114	8.09647e-05	0.046482	0.953518	0.0929641	0.999874	Down
SEITZ_NEOPLASTIC_TRANSFORMATION_BY_8P_DELETION_DN	18	0.0431872	0.0475024	0.952498	0.0950047	0.999874	Down
SENGUPTA_EBNA1_ANTICORRELATED	126	0.0463389	0.0480235	0.951977	0.0960469	0.999874	Down
SAKAI_CHRONIC_HEPATITIS_VS_LIVER_CANCER_DN	22	0.00269964	0.049486	0.950514	0.098972	0.999874	Down
REACTOME_COPI_MEDIATED_TRANSPORT	16	0.0741088	0.049621	0.950379	0.0992419	0.999874	Down
TAKEDA_TARGETS_OF_NUP98_HOXA9_FUSION_16D_DN	79	0.0057605	0.0496792	0.950321	0.0993583	0.999874	Down
WANG_HCP_PROSTATE_CANCER	55	0.010013	0.0498784	0.950122	0.0997569	0.999874	Down
Differentially expressed genes
ProbeID	Symbol	logFC	AveExpr	t	P.Value	adj.P.Val	B
4150612	Smchd1	-4.37259	7.96213	-18.3412	4.70131e-10	7.34486e-06	-1.22874
3190392	C030034I22Rik	-2.91055	6.31462	-10.5798	2.20124e-07	0.0017195	-1.53668
1990504	Mkrn3	2.19753	5.66383	9.43233	7.48993e-07	0.00390051	-1.64206
2100064	1700030C10Rik	1.97668	5.80668	6.76551	2.14488e-05	0.0837736	-2.05119
6940592	Pkp4	3.3745	7.14686	5.41057	0.00016523	0.516276	-2.41205
4490367	Ndn	2.55084	5.89043	4.64423	0.000587152	0.999928	-2.68865
5960465	NA	1.48745	6.18104	4.55014	0.000689844	0.999928	-2.72693
510056	NA	1.23445	6.34757	4.44504	0.000827049	0.999928	-2.77089
540689	Slc16a10	0.86164	6.44964	3.95321	0.0019676	0.999928	-2.99373
2710692	Olfr378	-0.668896	5.0664	-3.93166	0.00204504	0.999928	-3.00416
2750750	Sox12	0.852709	5.37865	3.90117	0.00215998	0.999928	-3.01899
770270	Sfxn2	0.688541	6.48888	3.79352	0.00262191	0.999928	-3.07227
1300246	Elavl2	1.45885	5.40308	3.78149	0.0026795	0.999928	-3.07831
3450735	Wars	-0.758629	7.16587	-3.7744	0.00271404	0.999928	-3.08188
5090632	Mospd3	0.933372	7.38113	3.69773	0.00311819	0.999928	-3.12084
6270521	Ncam1	1.79923	5.6904	3.68097	0.00321447	0.999928	-3.12945
4230014	Tcfcp2	0.620803	5.01466	3.41155	0.00525651	0.999928	-3.2723
5130577	Bbs7	1.35025	5.3467	3.40302	0.00533942	0.999928	-3.27696
1850368	1810043G02Rik	0.700976	5.76783	3.39111	0.00545738	0.999928	-3.28347
3390484	Scly	-0.6011	8.49766	-3.33548	0.00604459	0.999928	-3.31411
7380246	Cryz	0.848411	5.89368	3.3112	0.00632055	0.999928	-3.32759
2570576	Vhl	-0.619625	5.13267	-3.28942	0.00657901	0.999928	-3.33974
520040	NA	-1.14272	8.74137	-3.2751	0.00675474	0.999928	-3.34775
7040711	Zmat3	1.36096	7.54135	3.23367	0.00729031	0.999928	-3.37105
4150333	4632411B12Rik	-0.706325	5.26364	-3.23164	0.00731764	0.999928	-3.3722
2140450	Cxx1a	2.52124	9.47375	3.22874	0.00735677	0.999928	-3.37383
6200634	Fzd10	2.47701	6.6263	3.22568	0.00739837	0.999928	-3.37556
5670452	Slc38a10	-0.602956	5.7162	-3.21363	0.0075645	0.999928	-3.38238
6130044	Pear1	-1.0062	5.34212	-3.20845	0.0076372	0.999928	-3.38532
2350551	Rltpr	-1.05832	5.67944	-3.18491	0.0079759	0.999928	-3.3987
6270382	Ccng2	-0.698794	6.82461	-3.18421	0.00798626	0.999928	-3.3991
4900519	Sgk1	-0.939588	9.28234	-3.16948	0.00820616	0.999928	-3.4075
160735	Smchd1	-0.89246	5.85506	-3.16448	0.00828219	0.999928	-3.41036
1300446	Stxbp1	-0.78859	5.51269	-3.15071	0.00849522	0.999928	-3.41824
4480202	Agl	0.633589	7.09744	3.10757	0.00919933	0.999928	-3.44305
1580075	Tusc1	1.3315	6.81209	3.10157	0.00930175	0.999928	-3.44651
1510300	Tpk1	0.616446	5.73879	3.09967	0.00933453	0.999928	-3.44761
1570102	Gstm5	1.46054	5.52792	3.06408	0.0099685	0.999928	-3.46824
7210039	Gpc1	2.74621	6.91777	3.05201	0.0101931	0.999928	-3.47526
7510670	Commd10	1.03008	7.97278	3.04597	0.0103074	0.999928	-3.47878
5310682	Asap2	0.68035	5.06777	3.03311	0.0105552	0.999928	-3.48629
870608	Prr7	-1.05839	7.00824	-3.02947	0.0106264	0.999928	-3.48842
630615	Mtf2	-0.627305	9.88734	-3.01296	0.0109555	0.999928	-3.49808
870092	Arhgef6	-0.619197	5.6851	-3.0117	0.0109809	0.999928	-3.49882
1740427	Pml	-0.693089	8.84659	-2.95524	0.012188	0.999928	-3.53205
3310437	Pkp4	1.31954	5.35127	2.95471	0.0121998	0.999928	-3.53236
10180	4930415F15Rik	0.806	5.16029	2.92952	0.0127808	0.999928	-3.54728
2680341	Haghl	-0.58345	5.12853	-2.9062	0.0133433	0.999928	-3.56114
7160328	Nphp1	1.14268	6.27404	2.90413	0.0133942	0.999928	-3.56236
4570609	NA	1.31611	8.51152	2.88116	0.0139745	0.999928	-3.57606
